# Supplementary material for: Evidence for oceans pre-4300 Ma confirmed by preserved igneous compositions in Hadean zircon
Source: publisher site journal article supplement (doi:10.2138/am-2023-9180), 2024-03-28
Supplement: Supplementary file 1 [file 9180_suppA-D.xlsx]

## Sheet: Appendix A
American Mineralogist: October 2024 Online Materials AM-24-109180 (use tabs to navigate to other tables)
Cameron et al.: Igneous Hadean zircon
APPENDIX A. Summary of SIMS oxygen isotope data and locations for all samples.
Sample	δ18O Zircon (‰, VSMOW)*	Latitude	Longitude	Location Reference	Location
01JH-13a	6.2±0.8	26°10'00.3"S	116°59'28.9"E	Cavosie, 2005	Quartz pebble metaconglomerate from Eranondoo Hill locality
01JH-13b	5.4±2.2	26°10'00.3"S	116°59'28.9"E	Cavosie, 2005	Quartz pebble metaconglomerate from Eranondoo Hill locality
01JH-36	5.1±2.4	26°09'41.4"S	116°59'58.1"E	Cavosie, 2005	Quartzite/conglomerate from <1 km northeast of Eranondoo Hill locality
01JH-54a	6.2±1.2	26°10'01.0"S	116°59'27.9"E	Cavosie, 2005	Quartz pebble metaconglomerate from Eranondoo Hill locality
01JH-54b	7.1±0.9	26°10'01.0"S	116°59'27.9"E	Cavosie, 2005	Quartz pebble metaconglomerate from Eranondoo Hill locality
01JH-60a	6.2±0.5	26°10'01.0"S	116°59'27.9"E	Cavosie, 2005	Quartz pebble metaconglomerate from ~25 m southwest of Eranondoo Hill locality
01JH-60b	6.0±2.2	26°10'01.0"S	116°59'27.9"E	Cavosie, 2005	Quartz pebble metaconglomerate from ~25 m southwest of Eranondoo Hill locality
W74/3	6.4±0.5	33°25'27.39"N	118°25'57.76"W	Cavosie, 2005	Quartzite from Eranondoo Hill locality
W74/4	6.3±0.4	33°25'27.39"N	118°25'57.76"W	Cavosie, 2005	Quartzite from Eranondoo Hill locality
W62	7.2	See map	See map	Pidgeon and Wilde, 1998	Archean monzogranite from ~3 km southeast of Eranondoo Hill locality
W64	2.8±1.6	See map	See map	Pidgeon and Wilde, 1998	Archean tonalitic gneiss ~30 km northeast of Eranondoo Hill locality, near Mt. Hale
*Average values for zircons from respective samples -- all data compiled in Appendix B. Value is average ion microprobe value from all spots in zircon that did not overlap phases, cracks, etc. in zircons from given host rock. Precisions varied between 0.1 and 1.0‰ for individual sets of bracketed analyses, depending on ion microprobe spot size (10 or 3 µm). Precisions are the range of all zircon …

## Sheet: Appendix B
American Mineralogist: October 2024 Online Materials AM-24-109180 (use tabs to navigate to other tables)
Cameron et al.: Igneous Hadean zircon
APPENDIX B. δ18O-16OH/16O ANALYSES OF ZIRCON BY ION MICROPROBE
An. #	Spot name, Comment	δ18O ‰ VSMOW	2SD (external)	Mass Bias (‰)	δ18O ‰ measured	2 SE (internal)	16O (Gcps)	Primary Beam Current (nA)	Yield (Gcps/nA)	Time	X (um)	Y (um)	DTFA-X	DTFA-Y	C-bkg	H1-bkg	16OH/16O	2SD	EMHV (bit)	16OH/16O (corrected)	NOTES:
Session #1 Date: 7/19 to 7/24/2006
sample 01JH-13b
1	KIM-5.1				6.527	0.227	2.27071	2.32541	0.97648	11:33	-1174	5617
2	KIM-5.2				6.358	0.231	2.27916	2.34888	0.97032	11:36	-1172	5582
3	KIM-5.3				6.663	0.21	2.28228	2.34997	0.971195	11:39	-1176	5549
4	KIM-5.4				6.381	0.271	2.24851	2.34438	0.959109	11:43	-1174	5512
5	KIM-5.5				6.537	0.182	2.26882	2.33804	0.970393	11:46	-1171	5643
	average		0.314077	1.34144	6.4932	0.250521
6	2.5NM 1-2.1	7.06356	0.314077		8.405	0.197	2.27662	2.31516	0.983355	11:51	-3775	4588
7	2.5NM 1-2.2	6.93856	0.314077		8.28	0.213	2.25848	2.32486	0.971448	11:54	-3740	4582
8	2.5NM 1-2.3	6.89456	0.314077		8.236	0.224	2.26153	2.32889	0.971076	11:57	-3714	4579
9	2.5NM 1-2.4	7.11856	0.314077		8.46	0.21	2.26836	2.3285	0.974174	12:00	-3805	4600
10	KIM-5.6				6.367	0.204	2.23165	2.31895	0.962352	12:04	-1138	5640
11	KIM-5.7				6.523	0.233	2.2529	2.33276	0.965764	12:07	-1137	5608
12	KIM-5.8				6.416	0.238	2.2622	2.33186	0.970127	12:10	-1134	5577
13	KIM-5.9				6.111	0.225	2.24694	2.33065	0.964085	12:14	-1133	5544
	average		0.292612	1.24937	6.35425	0.349519
14	2.5NM 1-1.1	6.72363	0.292612		7.973	0.235	2.27673	2.29998	0.989893	12:18	-4943	4575
15	2.5NM 1-1.2	6.80863	0.292612		8.058	0.214	2.28089	2.32545	0.980842	12:22	-4915	4587
16	2.5NM 1-1.3	6.43663	0.292612		7.686	0.246	2.26677	2.31887	0.977529	12:25	-4946	4600
17	2.5NM 2-1.1	6.09863	0.292612		7.348	0.207	2.25402	2.30331	0.978602	12:29	-4339	4426
18	2.5NM 2-1.2	6.50762	0.292612		7.757	0.191	2.28594	2.31872	0.985865	12:32	-4257	4440
19	2.5NM 2-1.3	6.32163	0.292612		7.571	0.212	2.26873	2.30061	0.986143	12:36	-4260	4416
20	2.5NM 3-1.1	6.63463	0.292612		7.884	0.183	2.26631	2.29724	0.986534	12:40	-5292	4216
21	2.5NM 3-1.2	6.64363	0.292612		7.893	0.206	2.27924	2.30487	0.988878	12:44	-5410	4231
22	2.5NM 4-2.1 core	7.28863	0.292612		8.538	0.215	2.26176	2.29568	0.985226	12:48	-5861	3993
23	2.5NM 4-2.2 core	7.07163	0.292612		8.321	0.236	2.21689	2.29924	0.964184	12:51	-5827	4012
24	2.5NM 4-2.3 rim	6.55962	0.292612		7.809	0.237	2.24681	2.30694	0.973932	12:55	-5924	3963
25	2.5NM 6-4.1	7.03362	0.292612		8.283	0.202	2.25033	2.29376	0.981066	12:59	-2144	3820
26	2.5NM 6-4.2	6.61763	0.292612		7.867	0.281	2.24674	2.30819	0.973377	13:02	-2198	3838
27	KIM-5.10				6.238	0.235	2.25507	2.29478	0.982696	13:07	-1132	5512
28	KIM-5.11				6.529	0.219	2.24316	2.30381	0.973674	13:10	-1134	5478
29	KIM-5.12				6.256	0.278	2.24804	2.31215	0.972275	13:13	-1097	5478
30	KIM-5.13				6.275	0.311	2.2321	2.31704	0.963341	13:17	-1098	5517
	average		0.282021	1.19938	6.3245	0.274336
31	2.5nm 7-1.1 core	7.59763	0.282021		8.797	0.257	2.25592	2.2911	0.984646	13:21	-2771	3630
32	2.5nm 7-1.2 rim	8.37663	0.282021		9.576	0.299	2.25419	2.31015	0.975774	13:24	-2705	3673
33	2.5nm 7-1.3 rim	8.23762	0.282021		9.437	0.14	2.24061	2.30976	0.970063	13:27	-2853	3636
34	2.5nm 7-1.4 core	7.47762	0.282021		8.677	0.275	2.23407	2.28903	0.975991	13:31	-2802	3613
35	2.5nm 7-1.5 core	7.53463	0.282021		8.734	0.274	2.23313	2.29458	0.973217	13:34	-2797	3648
37	2.5nm 7-2.1 core	6.66263	0.282021		7.862	0.2	2.22858	2.28164	0.976746	13:38	-4207	3541
38	2.5nm 7-2.2 rim	7.02262	0.282021		8.222	0.198	2.13948	2.28789	0.935131	13:42	-4102	3539
39	2.5nm 7-5.1	6.33162	0.282021		7.531	0.253	2.19398	2.27205	0.965639	13:46	-3463	3641
40	2.5nm 7-5.2	6.31062	0.282021		7.51	0.25	2.22365	2.28872	0.971573	13:50	-3555	3636
41	2.5nm 8-1.1 core	6.84463	0.282021		8.044	0.203	2.23521	2.28457	0.978392	13:53	-4204	3307
42	2.5nm 8-1.2 rim	6.56862	0.282021		7.768	0.189	2.23899	2.29419	0.97594	13:57	-4319	3328
43	2.5nm 11-1.1 core	6.38363	0.282021		7.583	0.259	2.23664	2.27647	0.982501	14:01	-5783	2621
44	2.5nm 11-1.2 core	6.45263	0.282021		7.652	0.184	2.24002	2.30119	0.973418	14:04	-5779	2591
45	2.5nm 11-1.3 rim	6.84763	0.282021		8.047	0.225	2.25568	2.29791	0.981623	14:08	-5912	2574
46	KIM-5.14				6.111	0.209	2.21313	2.28469	0.968681	14:11	-1091	5557
47	KIM-5.15				6.222	0.191	2.21315	2.30342	0.960808	14:14	-1093	5579
48	KIM-5.16				6.208	0.258	2.22581	2.30119	0.96724	14:18	-1079	5602
49	KIM-5.17				6.476	0.231	2.21641	2.30413	0.961931	14:21	-1100	5628
	average		0.356819	1.124	6.25425	0.311711
50	2.5nm 12-1.1 core	6.808	0.356819		7.932	0.163	2.24982	2.27944	0.987003	14:25	-5230	2401
51	2.5nm 12-1.2 rim	6.127	0.356819		7.251	0.196	2.23567	2.2922	0.975339	14:28	-5129	2368
52	2.5nm 12-1.3 core	6.669	0.356819		7.793	0.207	2.24795	2.29783	0.978294	14:32	-5197	2402
53	2.5nm 16-2.1	6.579	0.356819		7.703	0.234	2.2061	2.27405	0.97012	14:37	-5489	1449
54	2.5nm 16-2.2	6.751	0.356819		7.875	0.235	2.24952	2.28257	0.985519	14:40	-5464	1488
55	2.5nm 17-1.1	7.353	0.356819		8.477	0.269	2.22294	2.27663	0.976419	14:45	-2005	1598
56	2.5nm 17-1.2	6.835	0.356819		7.959	0.287	2.21056	2.28915	0.96567	14:48	-1979	1562
57	2.5nm 17-1.3	7.092	0.356819		8.216	0.214	2.22656	2.28023	0.976463	14:52	-2061	1530
58	2.5nm 18-1.1	6.442	0.356819		7.566	0.191	2.22709	2.27952	0.976996	14:56	-2546	1272									Irregular Texture/Zoning: Alteration Suspected
59	2.5nm 18-1.2	6.927	0.356819		8.051	0.193	2.24828	2.29247	0.980725	14:59	-2574	1342
60	2.5nm 18-3.1	6.446	0.356819		7.57	0.277	2.23937	2.27808	0.983009	15:04	-2304	1336
61	2.5nm 18-3.2	6.45	0.356819		7.574	0.17	2.21662	2.29001	0.967954	15:07	-2220	1334
62	2.5nm 18-2.1	6.515	0.356819		7.639	0.226	2.22319	2.2832	0.973715	15:11	-1726	1373
63	2.5nm 18-2.2	6.234	0.356819		7.358	0.192	2.22362	2.29259	0.969918	15:14	-1679	1347
64	KIM-5.18				6.128	0.248	2.21819	2.28594	0.970362	15:18	-1121	5661
65	KIM-5.19				5.89	0.231	2.20826	2.29247	0.963265	15:21	-1150	5665
66	KIM-5.20				6.345	0.244	2.21246	2.30444	0.960085	15:24	-1178	5668
67	KIM-5.21				6.332	0.254	2.24459	2.30162	0.975221	15:28	-1176	5695
	average		0.350878	1.144	6.17375	0.427359
68	2.5nm 19-2.1 core	7.065	0.350878		8.209	0.25	2.21892	2.27651	0.974704	15:32	-1625	1134
69	2.5nm 19-2.2 rim	7.053	0.350878		8.197	0.152	2.21808	2.28613	0.970231	15:36	-1760	1183
70	2.5nm 19-4.1	6.722	0.350878		7.866	0.231	2.22307	2.28707	0.972014	15:39	-3093	1004
71	KIM-5.22				6.457	0.217	2.23867	2.26814	0.987007	15:53	-1143	5688
72	KIM-5.23				6.155	0.212	2.21955	2.28152	0.97284	15:57	-1112	5690
73	KIM-5.24				6.323	0.254	2.23885	2.29869	0.973968	16:00	-1077	5689
74	KIM-5.25				6.242	0.219	2.22437	2.29955	0.967304	16:03	-1071	5659
	average		0.297225	1.2975	6.29425	0.256735
75
76	2.5nm 19-1.1	6.0055	0.297225		7.303	0.209	2.24161	2.2737	0.985891	16:08	-4350	883
77	2.5nm 19-1.2	5.7565	0.297225		7.054	0.282	2.23625	2.29325	0.975141	16:11	-4481	856
78	2.5nm 20-2.1	8.0585	0.297225		9.356	0.263	2.20413	2.28782	0.963421	16:15	-4444	679
79	2.5nm 20-2.2 rim?	8.2315	0.297225		9.529	0.253	2.22095	2.28727	0.971004	16:18	-4400	690
80	2.5nm 20-2.3	8.2145	0.297225		9.512	0.259	2.23753	2.29192	0.976266	16:21	-4470	674
81	2.5nm 20-2.4	8.1305	0.297225		9.428	0.334	2.21624	2.28496	0.969926	16:25	-4484	713
82	2.5nm 20-2.5	8.2645	0.297225		9.562	0.197	2.23384	2.27573	0.981592	16:29	-4418	664
83	2.5nm 20-3.1	6.7485	0.297225		8.046	0.184	2.22969	2.27237	0.981219	16:34	-4815	673
84	2.5nm 20-3.2 core	6.3155	0.297225		7.613	0.182	2.20924	2.27546	0.9709	16:37	-4705	635
85	2.5nm 22-6.1 rim	6.3905	0.297225		7.688	0.257	2.21185	2.26661	0.975838	16:41	-2050	487
86	2.5nm 22-6.2	6.5135	0.297225		7.811	0.178	2.19911	2.27929	0.964825	16:45	-2178	452
87	2.5nm 23-2.1	6.0165	0.297225		7.314	0.256	2.2001	2.26724	0.970385	16:49	-2623	274
88	2.5nm 23-2.2	6.1655	0.297225		7.463	0.207	2.21035	2.27276	0.972542	16:52	-2682	184
89	2.5nm 23-2.3	6.2735	0.297225		7.571	0.296	2.19467	2.27166	0.966108	16:56	-2486	200
90	KIM-5.26				6.596	0.196	2.207	2.26286	0.975315	17:00	-1063	5625
91	KIM-5.27				6.417	0.304	2.20381	2.28383	0.964964	17:03	-1048	5600
92	KIM-5.28				6.547	0.273	2.21622	2.27952	0.972231	17:06	-1048	5571
93	KIM-5.29				6.363	0.258	2.20488	2.27581	0.968836	17:10	-1064	5544
	average		0.352662	1.28163	6.48075	0.217871
94	2.5nm 24-4.1	4.77738	0.352662		6.059	0.244	2.19157	2.24933	0.974321	17:15	-1995	-39
95	2.5nm 24-4.2	4.58938	0.352662		5.871	0.301	2.19094	2.26575	0.966981	17:18	-2064	-33
96	2.5nm 24-4.3	4.71837	0.352662		6	0.334	2.19283	2.26928	0.966312	17:22	-1918	20
97	2.5nm 24-1.1	6.62838	0.352662		7.91	0.233	2.18751	2.25918	0.968277	17:26	-2816	-106
98	2.5nm 24-1.2	6.60438	0.352662		7.886	0.255	2.20853	2.26556	0.974829	17:29	-3020	-172
99	2.5nm 24-2.1	5.12538	0.352662		6.407	0.24	2.19463	2.25226	0.974411	17:33	-4017	-197									Irregular Texture/Zoning: Alteration Suspected
100	2.5nm 24-2.2	5.38938	0.352662		6.671	0.228	2.20207	2.2618	0.973588	17:37	-3924	-177									Irregular Texture/Zoning: Alteration Suspected
101	2.5nm 24-2.3	4.90038	0.352662		6.182	0.191	2.18902	2.26751	0.965385	17:40	-3977	-249									Irregular Texture/Zoning: Alteration Suspected
102	2.5nm 24-2.4	5.39438	0.352662		6.676	0.163	2.20336	2.26278	0.973739	17:44	-3973	-192									Irregular Texture/Zoning: Alteration Suspected
103	2.5nm 24-7.1	6.64438	0.352662		7.926	0.214	2.20671	2.25339	0.979282	17:47	-4577	-270
104	2.5nm 24-7.2	6.54638	0.352662		7.828	0.202	2.20726	2.25496	0.978849	17:51	-4668	-261
105	2.5nm 25-8.1 core	6.66937	0.352662		7.951	0.292	2.20402	2.2523	0.978563	17:55	-5378	-670
106	2.5nm 25-8.2 rim	6.69838	0.352662		7.98	0.205	2.19809	2.26407	0.970858	17:58	-5306	-580
107	2.5nm 25-7.1	6.21237	0.352662		7.494	0.228	2.19047	2.24631	0.97514	18:03	-3413	-436
108	2.5nm 25-7.2	6.17438	0.352662		7.456	0.242	2.19942	2.25723	0.974388	18:07	-3515	-384
109	2.5nm 25-5.1	6.11437	0.352662		7.396	0.212	2.18032	2.25347	0.96754	18:11	-2799	-328
110	2.5nm 25-5.2	6.03238	0.352662		7.314	0.203	2.19422	2.26392	0.969216	18:14	-2665	-364
111	KIM-5.30				6.516	0.203	2.19962	2.25007	0.977579	18:18	-1177	5723
112	KIM-5.31				6.151	0.226	2.19575	2.26712	0.968516	18:22	-1143	5721
113	KIM-5.32				6.19	0.207	2.20112	2.27655	0.966868	18:25	-1108	5718
114	KIM-5.33				6.193	0.282	2.18307	2.28242	0.956472	18:28	-1073	5712
	average		0.227189	1.17738	6.2625	0.340159
115	2.5M 1-3.1	6.14663	0.227189		7.324	0.389	2.16772	2.24307	0.96641	18:33	-1958	-1159
116	2.5M 1-3.2	6.17963	0.227189		7.357	0.24	2.17113	2.25613	0.962323	18:36	-2032	-1184
117	2.5M 2-1.1	6.30663	0.227189		7.484	0.202	2.16291	2.25109	0.960828	18:40	-1993	-1442
118	2.5M 2-1.2	6.23963	0.227189		7.417	0.232	2.17857	2.24956	0.968445	18:44	-1952	-1484
119	2.5M 5-3.1	6.50063	0.227189		7.678	0.221	2.1808	2.23916	0.973937	18:48	-2940	-2220
120	2.5M 5-3.2	6.67963	0.227189		7.857	0.214	2.16941	2.25113	0.963701	18:52	-2789	-2206
121	2.5M 5-2.1	6.50463	0.227189		7.682	0.249	2.15421	2.24099	0.961275	18:56	-4415	-2441
122	2.5M 5-2.2	6.88063	0.227189		8.058	0.21	2.04219	2.24209	0.910843	19:00	-4368	-2424
123	2.5M 6-3.1 rim	6.62063	0.227189		7.798	0.23	2.18593	2.23947	0.976095	19:04	-3338	-2494
124	2.5M 6-3.2 core	5.68263	0.227189		6.86	0.274	2.16716	2.24197	0.966632	19:08	-3407	-2496
125	2.5M 6-3.3 rim	6.65763	0.227189		7.835	0.259	2.1804	2.24385	0.971723	19:12	-3362	-2464
126	2.5M 6-3.4 core	6.06762	0.227189		7.245	0.257	2.10652	2.24495	0.938338	19:16	-3431	-2486
127	2.5M 8.4.1 rim	5.80763	0.227189		6.985	0.286	2.17042	2.23211	0.972359	19:21	-2414	-2773
128	2.5M 8.4.2 core	4.09262	0.227189		5.27	0.202	2.17101	2.24029	0.969073	19:25	-2404	-2722
129	2.5M 8.4.3 rim	5.95363	0.227189		7.131	0.228	2.16868	2.24436	0.966279	19:28	-2358	-2718
130	2.5M 8.4.4 rim	5.84463	0.227189		7.022	0.203	2.1565	2.24549	0.960369	19:32	-2542	-2748
131	2.5M 10-3.1	6.48563	0.227189		7.663	0.193	2.18725	2.2264	0.982414	19:36	-5438	-3566
132	2.5M 10-3.2	6.30663	0.227189		7.484	0.252	2.1835	2.24557	0.972359	19:39	-5533	-3584
133	2.5M 10-4.1 core	6.25263	0.227189		7.43	0.29	2.18941	2.2264	0.983385	19:44	-5155	-3478
134	2.5M 10-4.2 rim	6.23863	0.227189		7.416	0.192	2.16551	2.24714	0.963674	19:47	-5056	-3462
135	KIM-5.34				6.265	0.256	2.17822	2.23004	0.976763	19:51	-1209	5724
136	KIM-5.35				6.295	0.21	2.17231	2.25363	0.963918	19:54	-1209	5693
137	KIM-5.36				6.301	0.213	2.18872	2.25578	0.970273	19:57	-1212	5664
138	KIM-5.37				6.228	0.171	2.18061	2.25371	0.967565	20:00	-1210	5631
	average		0.318844	1.28875	6.27225	0.0668805
139	2.5M 13-2.1 core	6.40925	0.318844		7.698	0.238	2.15986	2.22934	0.968836	20:04	-5115	-3978
140	2.5M 13-2.2 rim	6.70425	0.318844		7.993	0.239	2.16157	2.23	0.969313	20:08	-5027	-3951
141	2.5M 16-1.1	5.94625	0.318844		7.235	0.25	2.16962	2.21303	0.980385	20:13	-3398	-4190
142	2.5M 16-2.2	6.05525	0.318844		7.344	0.201	2.15446	2.22425	0.968624	20:17	-3312	-4175
143	2.5M 18-1.1	6.24525	0.318844		7.534	0.277	2.10688	2.22222	0.948099	20:23	-1985	-4277
144	2.5M 18-1.2	6.31625	0.318844		7.605	0.286	2.16849	2.24909	0.964163	20:27	-1837	-4273
145	2.5M 19-3.1	6.84425	0.318844		8.133	0.251	2.19228	2.24002	0.978688	20:31	-3367	-4641
146	2.5M 19-3.2	6.49825	0.318844		7.787	0.244	2.18481	2.24905	0.971435	20:35	-3263	-4639
147	2.5M 19-3.3	6.27425	0.318844		7.563	0.248	2.17218	2.26505	0.958997	20:38	-3400	-4651
148	2.5M 24.1.1	7.23925	0.318844		8.528	0.256	2.1793	2.24455	0.97093	20:43	-5352	-5689
149	2.5M 24.1.2	7.53125	0.318844		8.82	0.239	2.18267	2.26443	0.963894	20:46	-5373	-5684
150	2.5M 24.1.3	6.90225	0.318844		8.191	0.224	2.19499	2.27225	0.965999	20:50	-5414	-5732
151	2.5M 24.1.4	7.47825	0.318844		8.767	0.199	2.20649	2.26998	0.972032	20:53	-5321	-5700
152	2.5M 24.1.5	6.86125	0.318844		8.15	0.217	2.1595	2.26396	0.953862	20:56	-5331	-5669
153	KIM-5.38				6.564	0.24	2.20151	2.24788	0.979372	21:01	-1209	5600
154	KIM-5.39				6.438	0.325	2.19404	2.27878	0.962815	21:04	-1208	5573
155	KIM-5.40				6.663	0.2	2.18582	2.28046	0.958497	21:07	-1202	5540
156	KIM-5.41				6.276	0.167	2.19731	2.28214	0.962826	21:10	-1201	5515
	average				6.48525	0.334295
157	KIM-5.42				6.63	0.192	2.19918	2.27491	0.966713	21:19	-1238	5720
158	KIM-5.43				6.689	0.233	2.19483	2.28347	0.961182	21:22	-1236	5688
	average				6.53504	0.293179
159	KIM-5.44				6.568	0.204	2.24814	2.28582	0.983514	22:18	-1241	5662
160	KIM-5.45				6.092	0.213	2.20333	2.3044	0.95614	22:21	-1240	5636
161	KIM-5.46				6.212	0.306	2.21918	2.31035	0.960542	22:24	-1240	5633
162	KIM-5.47				6.415	0.225	2.22278	2.30784	0.963142	22:27	-1238	5581
163	KIM-5.48				6.234	0.275	2.20995	2.30174	0.960123	22:30	-1234	5551
164	KIM-5.49				6.362	0.196	2.20914	2.29853	0.96111	22:33	-1232	5522
	average		0.321473	1.23625	6.31383	0.338359
165	2.5M 25-3.1	5.92575	0.321473		7.162	0.343	2.11798	2.24933	0.941606	22:38	-1413	-5279
166	2.5M 25-3.2	6.33675	0.321473		7.573	0.192	2.16506	2.25648	0.959482	22:42	-1369	-5261
167	5M 2-1.1	5.29275	0.321473		6.529	0.163	2.14889	2.24401	0.957612	22:57	1238	-1071
168	5M 2-1.2	5.01775	0.321473		6.254	0.233	2.14591	2.26118	0.949024	23:00	1190	-1092									Proximal to <85% Concordant U-Pb Analysis
169	5M 2-1.3	5.07275	0.321473		6.309	0.282	2.14369	2.26227	0.947583	23:04	1277	-1002
170	5M 4-2.1 core	4.38175	0.321473		5.618	0.232	2.17013	2.2388	0.969325	23:08	346	-1603
171	5M 4-2.2 rim	3.81275	0.321473		5.049	0.174	2.14192	2.24878	0.952481	23:12	225	-1592
172	5M 4-2.3 core	4.46175	0.321473		5.698	0.285	2.15123	2.24217	0.959441	23:16	310	-1601
173	5M 4-2.4 rim	3.75875	0.321473		4.995	0.292	2.1657	2.24749	0.963608	23:19	310	-1560
174	5M 6-2.1	5.43775	0.321473		6.674	0.204	2.145	2.23231	0.960886	23:24	2575	-1698
175	5M 6-2.2	5.44375	0.321473		6.68	0.255	2.14321	2.24854	0.953156	23:27	2546	-1685
176	5M 9-1.1 rim low yield				6.543	0.227	1.97237	2.22785	0.885323	23:33	2942	-2416									Irregular Analysis/Grain Behavior
177	5M 9-1.2 core low yield				10.53	0.369	1.74111	2.24142	0.776786	23:36	2909	-2415									Irregular Analysis/Grain Behavior
178	5M 9-1.3 core low yield				10.095	0.399	1.75727	2.23759	0.785341	23:40	2874	-2422									Irregular Analysis/Grain Behavior
179	5M 9-1.4 rim low yield				6.199	0.308	1.96348	2.22672	0.881784	23:44	2807	-2430									Irregular Analysis/Grain Behavior
180	5M 10-2.1 core	6.15075	0.321473		7.387	0.189	2.10115	2.22179	0.945704	23:49	1624	-2761
181	5M 10-2.2 core	5.32175	0.321473		6.558	0.163	2.12868	2.23309	0.953245	23:52	1606	-2767
182	5M 10-2.3 rim?	5.49275	0.321473		6.729	0.25	2.13806	2.23258	0.95766	23:56	1680	-2764
183	KIM-5.50				6.042	0.305	2.17784	2.22046	0.980808	00:01	-1271	5719
184	KIM-5.51				6.318	0.234	2.16573	2.24843	0.963221	00:04	-1267	5693
185	KIM-5.52				6.496	0.272	2.13448	2.25582	0.946211	00:07	-1268	5664
186	KIM-5.53				6.491	0.266	2.15807	2.25856	0.955509	00:10	-1268	5664
187	KIM-5.54				6.305	0.269	2.16546	2.25946	0.9584	00:13	-1266	5612
188	KIM-5.55				6.38	0.288	2.17492	2.26098	0.961936	00:16	-1264	5613
	average		0.297711	1.31325	6.33867	0.333754
189	5M 10-4.1	4.70675	0.297711		6.02	0.202	2.143	2.2379	0.957592	00:19	543	-2933
190	5M 10-4.2	4.98775	0.297711		6.301	0.218	2.14844	2.24514	0.95693	00:23	599	-2900
191	5M 12-4.1	6.18975	0.297711		7.503	0.261	2.10739	2.22977	0.945117	00:27	2572	-3035
192	5M 12-4.2	6.18775	0.297711		7.501	0.266	2.11258	2.23094	0.946943	00:31	2468	-3048
193	5M 13-2.1	5.71675	0.297711		7.03	0.246	2.14378	2.22343	0.964178	00:35	356	-3413
194	5M 13-2.2	5.73775	0.297711		7.051	0.216	2.13074	2.23403	0.953765	00:39	458	-3407
195	5M 14-1.1	5.73075	0.297711		7.044	0.223	2.14148	2.22335	0.963176	00:43	-701	-3726
196	5M 14-1.2	5.88775	0.297711		7.201	0.231	2.14449	2.23047	0.961452	00:46	-606	-3655
197	5M 14-4.1 core	6.58675	0.297711		7.9	0.361	2.15676	2.2153	0.973578	00:52	279	-3563									Irregular Texture/Zoning: Alteration Suspected
198	5M 14-4.2 rim	6.32475	0.297711		7.638	0.24	2.14412	2.23528	0.959214	00:55	392	-3554
199	5M 14-4.3 core	6.58075	0.297711		7.894	0.258	2.15092	2.22108	0.96841	01:00	314	-3554									Irregular Texture/Zoning: Alteration Suspected
200	5M 20-1.1	5.84275	0.297711		7.156	0.238	2.10521	2.22163	0.947596	01:04	3228	-4332
201	5M 20-1.2	4.41675	0.297711		5.73	0.22	2.11951	2.24268	0.945082	01:07	3301	-4299
202	5M 20-1.3 core	4.29375	0.297711		5.607	0.281	2.13863	2.25097	0.950092	01:11	3255	-4317
203	5M 20-1.4 rim?	6.18175	0.297711		7.495	0.309	2.18159	2.25328	0.968183	01:14	3194	-4327
204	5M 22-1.1 core: Z-focus	6.17175	0.297711		7.485	0.309	2.00341	2.22335	0.901077	01:19	-634	-5123
205	5M 22-1.2 rim low yield	5.62875	0.297711		6.942	0.238	1.90702	2.2451	0.849415	01:22	-689	-5144									Irregular Grain/Analysis
206	5M 22-1.3 core	6.16875	0.297711		7.482	0.263	2.08256	2.23747	0.930763	01:26	-513	-5137
207	5M 22-2.1	5.89875	0.297711		7.212	0.194	2.12803	2.22386	0.956906	01:30	367	-4998
208	5M 22-2.2	5.71175	0.297711		7.025	0.215	1.95762	2.21889	0.882248	01:34	492	-4956
209	5M 22-4.1 core	6.35575	0.297711		7.669	0.304	2.15595	2.22523	0.968868	01:37	2417	-4777
210	5M 22-4.2 rim	6.74475	0.297711		8.058	0.233	2.16997	2.24127	0.968191	01:41	2492	-4798
211	5M 22-4.3 core	6.01275	0.297711		7.326	0.17	2.14111	2.24893	0.952053	01:44	2379	-4773
212	5M 22-4.4 rim: burned out?	5.89575	0.297711		7.209	0.269	2.15773	2.24772	0.959962	01:47	2339	-4750
213	KIM-5.56				6.527	0.21	2.1868	2.22507	0.982797	01:52	-1250	5754
214	KIM-5.57				6.502	0.255	2.18613	2.24835	0.972325	01:55	-1250	5754
215	KIM-5.58				6.515	0.217	2.17241	2.25418	0.963726	01:58	-1194	5762
216	KIM-5.59				6.263	0.285	2.14156	2.25797	0.948445	02:01	-1156	5763
217	KIM-5.60				6.542	0.222	2.1816	2.25977	0.96541	02:04	-1130	5762
218	KIM-5.61				6.458	0.319	2.16807	2.26227	0.95836	02:07	-1096	5765
	average				6.46783	0.208704
sample: 01JH-13a
219	KIM-5.1				6.44	0.224	2.17546	2.28085	0.953791	02:25	-1115	6510
220	KIM-5.2				6.618	0.253	2.17918	2.29251	0.950566	02:28	-1115	6510
221	KIM-5.3				6.841	0.337	2.17648	2.29396	0.948788	02:31	-1051	6505
222	KIM-5.4				6.492	0.222	2.1597	2.29145	0.9425	02:34	-1015	6505
223	KIM-5.5				6.338	0.223	2.18943	2.27964	0.960429	02:37	-982	6503
	average		0.301374	1.49567	6.5458	0.386814
224	2.5NM 2-2.1	6.21033	0.301374		7.706	0.254	2.20668	2.25269	0.979574	02:42	-3412	4888
225	2.5NM 2-2.2	6.27433	0.301374		7.77	0.257	2.19976	2.27041	0.968883	02:45	-3285	4758
226	2.5NM 2-2.3	6.86433	0.301374		8.36	0.16	2.189	2.26063	0.968313	02:48	-3496	4942
227	2.5NM 3-1.1	6.11133	0.301374		7.607	0.247	2.1693	2.25621	0.961481	02:52	-1984	4578
228	2.5NM 3-1.2	6.30333	0.301374		7.799	0.223	2.18262	2.26615	0.963141	02:55	-1813	4644
229	2.5NM 3-6.1	6.58133	0.301374		8.077	0.162	2.21349	2.25476	0.981697	02:58	-4152	4543
230	2.5NM 3-6.2	6.71133	0.301374		8.207	0.262	2.1902	2.25738	0.970236	03:02	-4274	4427
231	2.5NM 3-6.3	6.58233	0.301374		8.078	0.271	2.22527	2.26321	0.983237	03:05	-4240	4663
232	2.5NM 4-4.1	6.17533	0.301374		7.671	0.312	2.17176	2.27092	0.956337	03:09	-5586	3946
233	2.5NM 4-4.2	5.66033	0.301374		7.156	0.228	2.17882	2.26372	0.962494	03:13	-5456	3904
234	2.5NM 4-4.3	5.94233	0.301374		7.438	0.195	2.22968	2.24514	0.993115	03:16	-5767	4025
235	2.5NM 5-3.1	6.55833	0.301374		8.054	0.252	2.23316	2.23888	0.997445	03:20	-4887	3603
236	2.5NM 5-3.2	6.35833	0.301374		7.854	0.23	2.20304	2.24534	0.981161	03:23	-4800	3711
237	2.5NM 5-3.3	5.73833	0.301374		7.234	0.204	2.17182	2.23321	0.972512	03:27	-4840	3654
238	2.5NM 5-3.4	6.38533	0.301374		7.881	0.272	2.20359	2.24096	0.983326	03:30	-4563	3615
239	2.5NM 6-2.1	6.21633	0.301374		7.712	0.232	2.21433	2.21905	0.997874	03:34	-5964	3097
240	2.5NM 6-2.2	5.81833	0.301374		7.314	0.183	2.18701	2.24037	0.976182	03:37	-5818	3147
241	2.5NM 6-2.3	6.12833	0.301374		7.624	0.154	2.18702	2.23704	0.977639	03:40	-5888	3151
242	KIM-5.6				6.727	0.294	2.13726	2.2268	0.959793	03:44	-1164	6478
243	KIM-5.7				6.647	0.243	2.15041	2.23892	0.960468	03:47	-1164	6478
244	KIM-5.8				6.597	0.255	2.14902	2.25062	0.954858	03:50	-1131	6477
245	KIM-5.9				6.571	0.186	2.14328	2.25113	0.952093	03:53	-1070	6472
	average		0.449009	1.4317	6.6355	0.137341
246	2.5NM_6-3.1 core	7.2393	0.449009		8.671	0.297	2.12939	2.18533	0.9744	03:58	-1954	3409
247	2.5NM_6-3.2 rim	6.8423	0.449009		8.274	0.242	2.12354	2.17638	0.975721	04:01	-1815	3290
248	2.5NM_6-3.3 core	7.1803	0.449009		8.612	0.229	2.12622	2.1664	0.981452	04:04	-2037	3426
249	2.5NM_6-3.4 rim	6.7213	0.449009		8.153	0.258	2.09421	2.18338	0.959159	04:07	-2037	3426
250	2.5NM_8-2.1	6.4703	0.449009		7.902	0.279	2.11092	2.14054	0.986161	04:12	-4982	2090
251	2.5NM_8-2.2	6.7323	0.449009		8.164	0.195	2.1293	2.15255	0.989198	04:16	-5092	2223
252	2.5NM_8-2.3	6.4823	0.449009		7.914	0.307	2.12109	2.1556	0.983989	04:19	-5115	2086
253	2.5NM_9-1.1 core	6.9143	0.449009		8.346	0.226	2.09666	2.13753	0.980877	04:23	-3610	1592
254	2.5NM_9-1.2 rim	6.1533	0.449009		7.585	0.288	2.10966	2.14508	0.983487	04:27	-3788	1637
255	2.5NM_9-1.3 core	6.8323	0.449009		8.264	0.253	2.0968	2.15087	0.97486	04:30	-3686	1588
256	2.5NM_9-1.4 rim	6.1083	0.449009		7.54	0.295	2.09151	2.13358	0.980281	04:34	-3475	1614
257	2.5NM_9-1.5 rim	6.0403	0.449009		7.472	0.218	2.05453	2.14113	0.959551	04:37	-3402	1713
258	2.5NM_9-1.6 core	6.6303	0.449009		8.062	0.217	2.07386	2.14371	0.967415	04:41	-3663	1587
259	2.5NM_9-1.7 c/r boundary	6.6173	0.449009		8.049	0.228	2.0839	2.13241	0.977249	04:45	-3548	1652
260	2.5NM_9-1.8 core	6.7353	0.449009		8.167	0.264	2.09567	2.15158	0.974015	04:48	-3583	1643
261	2.5NM_9-1.9 rim	6.4063	0.449009		7.838	0.241	2.07364	2.14477	0.966834	04:51	-3478	1696
262	2.5NM_9-1.10 core	6.6113	0.449009		8.043	0.204	2.07841	2.1389	0.97172	04:55	-3637	1589
263	2.5NM_9-1.11 rim	6.2333	0.449009		7.665	0.2	2.06723	2.14117	0.965465	04:58	-3450	1688
264	2.5NM_9-1.12 core	6.6503	0.449009		8.082	0.248	2.06918	2.13933	0.967209	05:02	-3732	1580
265	2.5NM_9-1.13 rim	6.0433	0.449009		7.475	0.354	2.06552	2.14512	0.962892	05:05	-3771	1580
266	KIM-5.10				6.449	0.21	2.06026	2.13198	0.966359	05:09	-1163	6452
267	KIM-5.11				6.644	0.217	2.06604	2.1391	0.965845	05:12	-1163	6452
268	KIM-5.12				6.666	0.363	2.04071	2.15717	0.946014	05:15	-1128	6451
269	KIM-5.13				5.946	0.265	2.02977	2.163	0.938408	05:18	-1095	6445
270	KIM-5.14				6.564	0.311	2.07113	2.1459	0.965153	05:22	-1064	6441
271	KIM-5.15				6.406	0.271	2.06408	2.14321	0.963079	05:25	-1006	6468
	average		0.429109	1.36836	6.44583	0.531516
272	2.5NM_9-1.14 core	6.67964	0.429109		8.048	0.262	2.04384	2.13808	0.955921	05:29	-3626	1656
273	2.5NM_9-1.15 core	6.88764	0.429109		8.256	0.261	2.09025	2.14356	0.975132	05:32	-3624	1693
274	2.5NM_9-1.16 rim	6.30564	0.429109		7.674	0.209	2.07798	2.14504	0.968737	05:35	-3508	1692
275	2.5NM_9-1.17 rim	6.34864	0.429109		7.717	0.27	2.07956	2.15995	0.962784	05:38	-3539	1679
276	2.5NM_9-1.18 rim	6.21364	0.429109		7.582	0.267	2.07097	2.1497	0.963375	05:41	-3424	1704
279	2.5M_1-3.1 core	6.13864	0.429109		7.507	0.278	2.09011	2.12435	0.983883	05:46	-4801	-621
280	2.5M_1-3.2 rim	5.76864	0.429109		7.137	0.226	2.08687	2.1434	0.973624	05:50	-4624	-654
281	2.5M_1-3.3 ?	6.27764	0.429109		7.646	0.201	2.05442	2.13906	0.96043	05:53	-4723	-684
282	2.5M_2-1.1	6.35064	0.429109		7.719	0.243	2.06253	2.13562	0.965776	05:57	-4725	-978
283	2.5M_2-1.2	6.65464	0.429109		8.023	0.261	2.08305	2.13898	0.973854	06:00	-4849	-993
284	2.5M_2-1.3	5.94464	0.429109		7.313	0.257	2.08676	2.14825	0.971377	06:04	-4469	-1000
285	2.5M_2-1.4	6.32064	0.429109		7.689	0.339	2.06534	2.13515	0.967305	06:07	-4578	-1013
286	2.5M_3-3.1	6.23164	0.429109		7.6	0.236	2.07789	2.12357	0.97849	06:12	-2393	-1622
287	2.5M_3-3.2	6.36164	0.429109		7.73	0.253	2.08515	2.14888	0.970345	06:15	-2535	-1589
288	2.5M_3-4.1	6.60864	0.429109		7.977	0.22	2.0865	2.13691	0.976408	06:19	-4039	-1549
289	2.5M_3-4.2	6.84364	0.429109		8.212	0.29	2.09067	2.15705	0.969224	06:22	-4148	-1678
290	2.5M_3-4.3	6.32464	0.429109		7.693	0.277	2.08293	2.14919	0.96917	06:25	-4126	-1504
291	2.5M_5-1.1	6.19364	0.429109		7.562	0.257	2.09341	2.13483	0.980595	06:29	-3716	-2550
292	2.5M_5-1.2	6.34564	0.429109		7.714	0.27	2.09173	2.14367	0.975769	06:32	-3810	-2428
293	2.5M_5-1.3	6.57064	0.429109		7.939	0.219	2.09139	2.14223	0.97627	06:35	-3585	-2486
294	KIM-5.16				6.623	0.279	2.06685	2.12897	0.970822	06:39	-1186	6420
295	KIM-5.17				6.656	0.314	2.07178	2.15208	0.962683	06:42	-1153	6419
296	KIM-5.18				6.38	0.214	2.05412	2.15944	0.951229	06:45	-1153	6419
297	KIM-5.19				6.276	0.267	2.04853	2.17168	0.943291	06:48	-1117	6413
298	KIM-5.20				6.432	0.227	2.06299	2.14575	0.961432	06:51	-1080	6414
	average		0.332486	1.477	6.4734	0.324233
299	2.5M_5-5.1	6.406	0.332486		7.883	0.251	2.10124	2.12834	0.987267	06:55	-5387	-2569
300	2.5M_5-5.2	6.718	0.332486		8.195	0.272	2.09905	2.14571	0.978255	06:58	-5467	-2697
301	2.5M_5-5.3 cycle 5 no counts						1.99165	2.15408	0.924595	07:01	-5518	-2610									Irregular Analysis
302	2.5M_6-3.1	6.753	0.332486		8.23	0.225	2.10963	2.11465	0.997624	07:06	-6606	-2925
303	2.5M_6-3.2	7	0.332486		8.477	0.248	2.11129	2.13519	0.98881	07:09	-6662	-2851
304	2.5M_6-3.3	6.414	0.332486		7.891	0.354	2.0885	2.13937	0.976219	07:13	-6636	-2987
305	2.5M_6-6.1	5.096	0.332486		6.573	0.188	2.08534	2.11751	0.984808	07:17	-1997	-2921
306	2.5M_6-6.2	5.074	0.332486		6.551	0.335	2.09592	2.13155	0.983284	07:20	-1863	-2982
307	2.5M_6-6.3	5.033	0.332486		6.51	0.252	2.0778	2.13151	0.974804	07:24	-1917	-2946
308	2.5M_7-2.1	6.392	0.332486		7.869	0.364	2.11088	2.12138	0.995049	07:28	-6919	-3290
309	2.5M_7-2.2	6.499	0.332486		7.976	0.209	2.10088	2.12752	0.987478	07:31	-7017	-3368
310	2.5M_7-2.3	6.311	0.332486		7.788	0.29	2.0938	2.13933	0.978717	07:34	-6854	-3270
311	2.5M_7-6.1	6.1	0.332486		7.577	0.278	2.0304	2.13417	0.951378	07:37	-5770	-3240
312	2.5M_7-6.2	6.031	0.332486		7.508	0.298	2.08061	2.12732	0.978039	07:41	-5593	-3260
313	2.5M_7-6.3	6.308	0.332486		7.785	0.296	2.09354	2.14043	0.978093	07:44	-5886	-3307
314	2.5M_10-1.1 low value	4.294	0.332486		5.771	0.221	2.07728	2.12271	0.978601	07:48	-3622	-4283									Irregular Analysis
315	2.5M_10-1.2	5.701	0.332486		7.178	0.311	2.02592	2.12635	0.952772	07:51	-3647	-4307
316	2.5M_10-1.3	5.766	0.332486		7.243	0.277	2.06149	2.13292	0.96651	07:54	-3634	-4252
317	2.5M_10-1.4	5.722	0.332486		7.199	0.274	2.08369	2.12944	0.978515	07:58	-3543	-4220
318	2.5M_10-1.5	5.352	0.332486		6.829	0.228	2.04515	2.12998	0.960173	08:01	-3584	-4302
319	KIM-5.21				6.687	0.321	2.05859	2.13159	0.965753	08:05	-982	6503
320	KIM-5.22				6.83	0.228	2.04731	2.15298	0.950917	08:08	-1157	6379
321	KIM-5.23				6.59	0.283	2.04242	2.16311	0.944205	08:11	-1155	6396
322	KIM-5.24				6.515	0.325	2.04417	2.15916	0.946741	08:14	-1096	6386
323	KIM-5.25				6.681	0.242	2.06351	2.15443	0.957798	08:17	-1096	6386
	average		0.21089	1.53111	6.6606	0.236629
324	2.5M_10-2.1	6.82989	0.21089		8.361	0.244	2.08291	2.12419	0.980566	08:20	-3981	-4219
325	2.5M_10-2.2	6.51189	0.21089		8.043	0.302	2.03584	2.13069	0.955486	08:24	-4096	-4310
326	2.5M_10-2.3	6.94189	0.21089		8.473	0.285	2.07309	2.13237	0.972199	08:27	-4080	-4168
327	2.5M_10-3.1	5.02489	0.21089		6.556	0.344	2.01846	2.11782	0.953084	08:31	-3297	-4108
328	2.5M_10-3.2	5.79289	0.21089		7.324	0.199	2.07762	2.13018	0.975324	08:34	-3355	-4165
329	5M_3-2.1	6.44389	0.21089		7.975	0.184	2.05541	2.10155	0.978046	08:41	-200	-1678
330	5M_3-2.2	6.68989	0.21089		8.221	0.26	2.06248	2.12717	0.969588	08:44	59	-1770
331	5M_3-2.3	6.28589	0.21089		7.817	0.203	2.05078	2.12498	0.965086	08:48	133	-1864
332	5M_7-1.1	5.54889	0.21089		7.08	0.252	2.07062	2.11997	0.97672	08:52	1950	-3300									Irregular Texture/Zoning: Alteration Suspected
333	5M_7-1.2	5.84389	0.21089		7.375	0.194	2.03752	2.12224	0.96008	08:55	2114	-3258									Irregular Texture/Zoning: Alteration Suspected
334	10/20M 11-1.1	6.05989	0.21089		7.591	0.252	2.05873	2.10472	0.978154	09:01	-664	1196									Irregular Texture/Zoning: Alteration Suspected
335	10/20M 11-1.2	6.61689	0.21089		8.148	0.172	2.06511	2.12439	0.972095	09:04	-701	976									Irregular Texture/Zoning: Alteration Suspected
336	10/20M 9-2.1	6.42889	0.21089		7.96	0.249	2.07156	2.11442	0.97973	09:08	1359	1878
337	10/20M 9-2.2	6.27489	0.21089		7.806	0.249	2.06375	2.1195	0.973696	09:12	1166	1948
338	10/20M 6-1.1	5.53989	0.21089		7.071	0.283	2.07312	2.11156	0.981796	09:16	956	3508
339	10/20M 6-1.2	5.65589	0.21089		7.187	0.221	2.07447	2.12396	0.976698	09:19	1036	3540
340	10/20M 4-1.1	6.41489	0.21089		7.946	0.244	2.06507	2.11997	0.974103	09:23	562	4170
341	10/20M 4-1.2	6.57889	0.21089		8.11	0.214	2.06901	2.12787	0.972337	09:26	369	4167
342	10/20M 3-2.1	5.95489	0.21089		7.486	0.325	1.92375	2.11313	0.910382	09:30	2463	4501
343	10/20M 3-2.2	6.13589	0.21089		7.667	0.159	2.0717	2.12873	0.97321	09:33	2525	4595
344	5M 3-sb.1 speckled grain				5.82	0.276	2.05974	2.10483	0.978578	09:40	2659	-1674									Irregular Grain. Excluded.
345	KIM-5.26				6.47	0.218	1.99481	2.11465	0.943328	09:43	-1169	6505
346	KIM-5.27				6.638	0.32	2.04771	2.12944	0.961622	09:47	-1166	6543
347	KIM-5.28				6.585	0.249	2.03168	2.1276	0.954918	09:50	-1136	6533
348	KIM-5.29				6.594	0.286	2.03513	2.13722	0.952234	09:53	-1102	6544
	average				6.57175	0.143354
sample: 01JH-60b
349	KIM-5.1				6.588	0.269	2.12211	2.17978	0.973543	14:03	-2076	6284
350	KIM-5.2				6.745	0.244	2.13234	2.19801	0.970126	14:06	-2079	6259
351	KIM-5.3				6.901	0.293	2.14214	2.20399	0.971938	14:09	-2082	6232
352	KIM-5.4				6.688	0.284	2.16619	2.23908	0.967449	14:12	-2085	6205
353	average		0.233683	1.65238	6.7305	0.261771
354	10M 1-2.1	6.31262	0.233683		7.965	0.223	2.21289	2.22539	0.994386	14:18	-3656	5056									Irregular Texture/Zoning: Alteration Suspected
355	10M 1-2.2	6.03962	0.233683		7.692	0.202	2.17487	2.2424	0.969882	14:21	-3539	5131									Irregular Texture/Zoning: Alteration Suspected
356	10M 5-1.1 core	6.85062	0.233683		8.503	0.301	2.16929	2.2187	0.977729	14:25	-3537	3640									Proximal to <85% Concordant U-Pb Analysis
357	10M 5-1.2 core	6.74062	0.233683		8.393	0.177	2.16405	2.2052	0.981338	14:29	-3511	3639									Proximal to <85% Concordant U-Pb Analysis
358	10M 5-1.3 rim	8.63162	0.233683		10.284	0.327	2.14269	2.20888	0.970037	14:33	-3592	3657									Proximal to <85% Concordant U-Pb Analysis
359	10M 5-1.4 rim	7.78262	0.233683		9.435	0.302	2.14368	2.20125	0.973845	14:36	-3439	3656									Proximal to <85% Concordant U-Pb Analysis
360	10M 5-1.5 core	5.94862	0.233683		7.601	0.173	2.11374	2.191	0.964734	14:40	-3487	3632									Proximal to <85% Concordant U-Pb Analysis
361	10M 9-1.1	4.36862	0.233683		6.021	0.314	2.11799	2.17078	0.975679	14:45	-3594	2062
362	10M 9-1.2	4.51262	0.233683		6.165	0.195	2.12502	2.18381	0.973081	14:48	-3632	1988
363	5M 12-2.1 core	6.05862	0.233683		7.711	0.254	2.09567	2.16018	0.970136	14:56	524	1771
364	5M 12-2.2 core	5.53662	0.233683		7.189	0.263	2.08764	2.17207	0.961126	14:59	599	1752
365	5M 12-2.3 rim	5.88162	0.233683		7.534	0.268	2.09292	2.16542	0.966519	15:03	460	1794
366	5M 12-2.4 rim	5.98562	0.233683		7.638	0.33	2.09046	2.17094	0.96293	15:07	634	1793
367	5M 10-4.1	5.39662	0.233683		7.049	0.215	2.0953	2.16288	0.968754	15:11	292	2515
368	5M 10-4.2 rim?	5.19462	0.233683		6.847	0.303	2.09508	2.17262	0.964308	15:14	213	2628
369	5M 10-3.1	7.75762	0.233683		9.41	0.266	2.0876	2.1583	0.967243	15:19	1274	2588									Irregular Texture/Zoning: Alteration Suspected
370	5M 10-3.2	7.45362	0.233683		9.106	0.169	2.0778	2.16691	0.958876	15:22	1205	2585
371	5M 10-3.3	7.27362	0.233683		8.926	0.268	2.07294	2.17563	0.9528	15:26	1222	2560
372	5M 10-3.4	7.72262	0.233683		9.375	0.28	2.09933	2.1675	0.968552	15:29	1232	2540
373	5M 10-3.5	7.48662	0.233683		9.139	0.296	2.06311	2.17243	0.949678	15:33	1239	2617
375	5M 5-1.1	6.27662	0.233683		7.929	0.295	2.06229	2.14657	0.960739	15:38	206	4182
376	5M 5-1.2	6.27162	0.233683		7.924	0.287	2.08055	2.15431	0.965761	15:42	224	4162
377	KIM-5.5				6.609	0.165	2.10145	2.14993	0.977448	15:46	-2048	6286
378	KIM-5.6				6.703	0.289	2.09036	2.1673	0.964501	15:49	-2051	6261
379	KIM-5.7				6.85	0.241	2.09547	2.1522	0.97364	15:54	-2056	6234
380	KIM-5.8				6.855	0.207	2.09744	2.17325	0.965119	15:57	-2054	6208
	average		0.355863	1.68388	6.75425	0.239563
381	5M 3-2.1	6.85412	0.355863		8.538	0.168	2.08081	2.15936	0.963622	16:01	-885	4672
382	5M 3-2.2	6.89912	0.355863		8.583	0.21	2.08916	2.16851	0.963406	16:05	-928	4710
383	5M 3-1.1	5.60312	0.355863		7.287	0.163	2.03428	2.15275	0.944968	16:10	1904	5050									Proximal to <85% Concordant U-Pb Analysis
384	5M 3-1.2	5.78112	0.355863		7.465	0.244	2.06497	2.16593	0.953387	16:13	2022	5056									Proximal to <85% Concordant U-Pb Analysis
385	2.5NM 4-7.1	6.36313	0.355863		8.047	0.259	2.08198	2.14543	0.970424	16:20	679	-1625									Irregular Texture/Zoning: Alteration Suspected
386	2.5NM 4-7.2	6.43812	0.355863		8.122	0.225	2.08837	2.16468	0.964747	16:23	715	-1634									Irregular Texture/Zoning: Alteration Suspected
387	2.5NM 4-3.1	4.81112	0.355863		6.495	0.288	2.09101	2.14923	0.972912	16:28	2070	-1741
388	2.5NM 4-3.2	4.83812	0.355863		6.522	0.187	2.09064	2.16128	0.967319	16:31	2040	-1810									Irregular Texture/Zoning: Alteration Suspected
389	2.5NM 6-1.1	5.91612	0.355863		7.6	0.206	2.09914	2.14688	0.977761	16:36	-406	-2869
390	2.5NM 6-1.2	5.87512	0.355863		7.559	0.214	2.08341	2.16844	0.960791	16:39	-447	-2869
391	2.5NM 7-1.1	6.87812	0.355863		8.562	0.234	2.0945	2.14688	0.9756	16:45	13	-3125
392	2.5NM 7-1.2	6.20512	0.355863		7.889	0.279	2.04732	2.15623	0.949488	16:49	-27	-3143
393	2.5NM 7-1.3	6.48612	0.355863		8.17	0.19	2.08172	2.16374	0.962095	16:52	-110	-3151
394	2.5NM 7-2.1	7.01412	0.355863		8.698	0.145	2.08297	2.16006	0.964307	16:56	-1006	-3239
395	2.5NM 7-2.2	6.70613	0.355863		8.39	0.228	2.07639	2.16308	0.959923	17:00	-927	-3287
396	2.5NM 7-3.1	6.72112	0.355863		8.405	0.244	2.07082	2.15733	0.959903	17:04	2664	-2999
397	2.5NM 7-3.2	6.39813	0.355863		8.082	0.218	2.04643	2.17125	0.942511	17:07	2602	-2998
398	2.5NM 8-4.1	7.47412	0.355863		9.158	0.213	2.07263	2.1619	0.958707	17:11	2288	-3411
399	2.5NM 8-4.2	7.31712	0.355863		9.001	0.191	2.07817	2.16593	0.95948	17:15	2236	-3388
401	KIM-5.9				6.504	0.275	2.06863	2.16574	0.955161	17:22	-2017	6282
402	KIM-5.10				6.698	0.267	2.07469	2.18338	0.95022	17:25	-2022	6261
403	KIM-5.11				7.051	0.225	2.08865	2.18615	0.955401	17:29	-2026	6233
404	KIM-5.12				6.921	0.197	2.10125	2.18975	0.959585	17:32	-2024	6202
	average		0.339191	1.66437	6.7935	0.483726
405	2.5NM 8-10.1 core	5.96663	0.339191		7.631	0.297	2.09947	2.161	0.971528	17:37	-394	-3664
406	2.5NM 8-10.2 core	6.26763	0.339191		7.932	0.336	2.1394	2.16632	0.987571	17:40	-318	-3721
407	2.5NM 8-10.3 rim	6.49563	0.339191		8.16	0.312	2.10529	2.17328	0.968713	17:44	-460	-3643
408	2.5NM 9-3.1	6.94063	0.339191		8.605	0.202	2.12034	2.15017	0.986126	17:49	1817	-4002
409	2.5NM 9-3.2	6.74863	0.339191		8.413	0.256	2.09914	2.15885	0.97234	17:53	1818	-4054
410	2.5NM 9-3.3	6.82263	0.339191		8.487	0.265	2.10503	2.15396	0.977282	17:57	1779	-4052
411	2.5NM 9-4.1 core	5.60763	0.339191		7.272	0.309	2.0756	2.16245	0.959838	18:00	1961	-4049
412	2.5NM 9-4.2 rim	5.63663	0.339191		7.301	0.207	2.09177	2.16992	0.963985	18:04	1954	-4126
413	2.5NM 9-4.3 rim	5.19463	0.339191		6.859	0.292	2.09271	2.16777	0.965375	18:07	1968	-3939
414	KIM-5.13				6.746	0.283	2.08243	2.14547	0.970615	18:12	-2094	6178
415	KIM-5.14				6.782	0.277	2.08217	2.16581	0.961381	18:15	-2065	6180
416	KIM-5.15				6.625	0.166	2.09714	2.16914	0.966809	18:19	-2035	6176
417	KIM-5.16				6.708	0.26	2.09111	2.17555	0.961184	18:22	-2098	6153
	average		0.263724	1.5897	6.71525	0.134654
418	10M row6.1 w/qz incl	5.6153	0.263724		7.205	0.24	2.12157	2.14094	0.990956	18:29	-5670	3226
419	10M row6.2 w/qz incl	6.0973	0.263724		7.687	0.307	2.11962	2.15357	0.984235	18:33	-5606	3199
420	KIM-5.17				6.577	0.196	2.04771	2.14113	0.95637	18:38	-2066	6152
421	KIM-5.18				6.816	0.21	2.08912	2.15631	0.968838	18:41	-2035	6148
	average				6.6965	0.337997
sample: 01JH-36
422	KIM-5.1				6.256	0.301	2.04017	2.13835	0.954083	21:48	5753	-129
423	KIM-5.2				6.705	0.281	2.10034	2.15029	0.976773	21:52	5663	-75
424	KIM-5.3				6.665	0.25	2.0383	2.16175	0.942895	21:55	5788	-57
425	KIM-5.4				6.602	0.266	2.04551	2.1556	0.948928	21:58	5858	-115
426	KIM-5.5				6.877	0.215	2.11429	2.18279	0.968618	22:02	5893	-83
427	KIM-5.6				6.552	0.227	2.09714	2.2036	0.95169	22:05	5892	3
	average		0.320974	1.4889	6.6095	0.411904
428	115.1	5.6831	0.320974		7.172	0.222	2.17344	2.20102	0.987472	22:11	2649	-1972
429	115.2	5.3121	0.320974		6.801	0.315	2.13958	2.23176	0.958694	22:14	2668	-1940
430	115.3	5.8001	0.320974		7.289	0.179	2.17561	2.23845	0.971924	22:17	2679	-1966
431	5.1	5.9271	0.320974		7.416	0.205	2.1755	2.21271	0.983184	22:21	2448	-2305
432	5.2	6.2491	0.320974		7.738	0.242	2.10307	2.24166	0.938177	22:25	2412	-2336
433	KIM-5.7				6.572	0.233	2.1585	2.21514	0.974431	22:36	5827	-112
434	KIM-5.8				6.48	0.267	2.16254	2.23767	0.966424	22:39	5688	-215
435	KIM-5.9				6.565	0.246	2.15421	2.24311	0.96037	22:43	5629	-250
436	KIM-5.10				6.515	0.28	2.14787	2.23896	0.959314	22:46	5778	-248
	average			1.44637	6.533	0.0870096
437	69.1 core	4.72512	0.343976		6.091	0.219	2.14398	2.20818	0.970929	23:19	3546	-1062
438	69.2 core	4.47212	0.343976		5.838	0.2	2.13712	2.2063	0.968645	23:23	3623	-1039
439	69.3 core	4.94412	0.343976		6.31	0.202	2.15668	2.21647	0.973027	23:26	3605	-1072
440	69.4 core	4.78012	0.343976		6.146	0.251	2.1407	2.21107	0.968175	23:30	3489	-1083
441	69.5 rim	5.72612	0.343976		7.092	0.196	2.13827	2.20998	0.967552	23:34	3578	-836									Proximal to <85% Concordant U-Pb Analysis
442	69.6 rim	5.35712	0.343976		6.723	0.316	2.09586	2.20657	0.949826	23:39	3667	-965
443	69.7 rim	5.86812	0.343976		7.234	0.245	2.12647	2.20395	0.964845	23:43	3611	-864
444	69.8 rim	5.46812	0.343976		6.834	0.236	2.12822	2.19734	0.968543	23:48	3470	-903
445	69.9	3.53612	0.343976		4.902	0.21	2.13783	2.18702	0.97751	23:53	3598	-902									Irregular Texture/Zoning: Alteration Suspected
446	69.1	4.99612	0.343976		6.362	0.22	2.12812	2.19374	0.970086	23:57	3496	-1142
447	69.11	4.81412	0.343976		6.18	0.267	2.09575	2.18342	0.959849	00:02	3666	-1035
448	KIM-5.15				6.443	0.345	2.11486	2.18776	0.966678	00:06	5590	23
449	KIM-5.16				6.261	0.219	2.078	2.21142	0.939664	00:09	5622	30
450	KIM-5.17				6.41	0.248	2.10947	2.21361	0.952951	00:12	5657	28
451	KIM-5.18				6.374	0.235	2.08684	2.2169	0.941331	00:16	5619	71
	average				6.372	0.158367
						0.208847
sample: 01JH-54b
452	KIM-5.1				6.929	0.239	2.17156	2.21619	0.979861	00:43	-314	5392
453	KIM-5.2				7.009	0.219	2.18847	2.23157	0.980689	00:46	-314	5392
454	KIM-5.3				6.724	0.19	2.14991	2.24283	0.958568	00:49	-247	5396
455	KIM-5.4				6.686	0.228	2.16175	2.24933	0.961065	00:52	-247	5396
456	KIM-5.5				6.969	0.268	2.16586	2.22993	0.971269	00:55	-213	5399
	average				6.8634	0.295901
457	2.5NM1_1-2.1	6.7986	0.301841		8.491	0.268	2.13081	2.19812	0.969375	01:03	-118	-893
458	2.5NM1_1-2.2	6.8566	0.301841		8.549	0.229	2.15007	2.2167	0.969941	01:07	-191	-870
459	2.5NM1_1-2.3 rim?	6.1026	0.301841		7.795	0.28	2.10986	2.21643	0.951919	01:10	-143	-1040
460	2.5NM1_1-2.4	6.5766	0.301841		8.269	0.196	2.10382	2.22132	0.947105	01:14	-143	-966
461	2.5NM1_4-1.1	6.1626	0.301841		7.855	0.195	2.08202	2.2088	0.942603	01:18	590	-3054
462	2.5NM1_4-1.2	6.2796	0.301841		7.972	0.201	2.13155	2.21975	0.960263	01:21	582	-2740
463	2.5NM1_4-1.3	5.5266	0.301841		7.219	0.261	2.12115	2.22726	0.952356	01:25	615	-2956
464	2.5NM1_4-1.4	5.6466	0.301841		7.339	0.248	2.12817	2.24013	0.95002	01:28	805	-2921
465	2.5NM1_4-1.5	6.1956	0.301841		7.888	0.234	2.11158	2.22101	0.95073	01:32	624	-3003
466	(2.5NM2_7-1.1 rim)	5.9736	0.301841		7.666	0.193	2.15034	2.20419	0.97557	01:38	1973	3777
467	(2.5NM2_7-1.2 core)	6.7356	0.301841		8.428	0.225	2.16147	2.21647	0.975188	01:42	2038	3678
468	(2.5NM2_7-1.3 core)	6.7126	0.301841		8.405	0.233	2.16986	2.21659	0.978919	01:45	1988	3705
469	(2.5NM2_7-1.4 rim)	6.1536	0.301841		7.846	0.251	2.17599	2.21588	0.981998	01:49	1980	3743
470	(2.5NM2_7-1.5 core)	6.7856	0.301841		8.478	0.219	2.17844	2.22699	0.978199	01:52	1984	3724
471	(2.5NM2_7-1.6 core)	6.6946	0.301841		8.387	0.276	2.15025	2.23564	0.961808	01:55	2030	3709
472	(2.5NM2_7-1.7 core)	6.5726	0.301841		8.265	0.288	2.17707	2.23481	0.974163	01:59	2057	3642
473	(2.5NM2_7-1.8 rim)	6.0346	0.301841		7.727	0.309	2.08947	2.22539	0.938922	02:02	1993	3776
474	(2.5NM2_7-1.9 rim?)	6.0896	0.301841		7.782	0.247	2.16826	2.22625	0.973953	02:05	1971	3648
475	(2.5NM2_7-1.10 core)	6.7346	0.301841		8.427	0.195	2.14898	2.23587	0.961136	02:08	2000	3673
476	(2.5NM2_7-1.11 rim)	6.2826	0.301841		7.975	0.313	2.14458	2.2117	0.969653	02:12	2037	3744
477	KIM-5.6				6.827	0.173	2.13061	2.20419	0.966618	02:16	-329	5359
478	KIM-5.7				6.81	0.248	2.15127	2.22742	0.965814	02:19	-297	5357
479	KIM-5.8				6.663	0.222	2.13543	2.23841	0.953993	02:22	-297	5357
480	KIM-5.9				6.561	0.225	2.11844	2.23622	0.94733	02:25	-223	5364
481	KIM-5.10				6.646	0.268	2.13761	2.22054	0.962652	02:28	-223	5364
	average				6.7014	0.227651
482	2.5M_1-2.1	5.90878	0.257918		7.547	0.269	2.13412	2.17923	0.979299	02:34	-3830	-965
483	2.5M_1-2.2	5.98978	0.257918		7.628	0.242	2.12046	2.20118	0.963333	02:37	-3896	-1060
484	2.5M_1-2.3	6.18078	0.257918		7.819	0.218	2.12289	2.21314	0.959219	02:40	-3749	-875
485	2.5M_5-1.1	6.70078	0.257918		8.339	0.286	2.0851	2.1752	0.958577	02:46	-5067	-2960
486	2.5M_5-1.2	6.54878	0.257918		8.187	0.244	2.11872	2.20008	0.963021	02:49	-4988	-2998
487	(2.5M_9-2.1)	6.62178	0.257918		8.26	0.153	2.09076	2.18021	0.958973	02:55	-5136	-4726
488	(2.5M_9-2.2)	6.92978	0.257918		8.568	0.264	2.11569	2.19797	0.962567	02:58	-5156	-4784
489	(2.5M_9-2.3)	6.69178	0.257918		8.33	0.29	2.11743	2.20329	0.961033	03:01	-5126	-4869
490	(2.5M_9-2.4)	6.63378	0.257918		8.272	0.244	2.11055	2.18713	0.964985	03:05	-5186	-4616
491	2.5M_8-1.1	6.59578	0.257918		8.234	0.323	2.11237	2.17861	0.969599	03:09	-3103	-4237
492	2.5M_8-1.2	6.66678	0.257918		8.305	0.282	2.11498	2.19116	0.965234	03:12	-3175	-4324
493	2.5M_8-1.3	6.67578	0.257918		8.314	0.235	2.10551	2.1914	0.960806	03:16	-3053	-4205
494	5M_4-2.1 rim	6.03078	0.257918		7.669	0.328	2.1116	2.16601	0.97488	03:23	-5730	3109
495	5M_4-2.2 core	5.67078	0.257918		7.309	0.2	2.11612	2.18889	0.966753	03:26	-5759	3134
496	5M_4-2.3 rim	6.24778	0.257918		7.886	0.308	2.09967	2.19973	0.954514	03:30	-5835	3114
497	5M_4-2.4 core	5.08078	0.257918		6.719	0.205	2.08106	2.18807	0.951091	03:33	-5799	3145
498	5M_4-2.5 rim	5.95078	0.257918		7.589	0.256	2.18044	2.23102	0.977331	03:37	-5691	3146
499	KIM-5.11				6.72	0.271	2.21412	2.26982	0.975461	03:41	-268	5240
500	KIM-5.12				6.812	0.258	2.21538	2.29462	0.965466	03:44	-268	5240
501	KIM-5.13				6.943	0.209	2.21101	2.31758	0.954015	03:47	-167	5236
502	KIM-5.14				6.572	0.278	2.21495	2.33163	0.94996	03:50	-167	5236
	average				6.76175	0.312249
503	5M_4-1.1 core	5.87956	0.333684		7.572	0.268	2.23801	2.29388	0.975644	03:54	-5466	3105									Proximal to <85% Concordant U-Pb Analysis
504	5M_4-1.2 core	7.16156	0.333684		8.854	0.236	2.23375	2.31586	0.964546	03:57	-5483	3062
505	5M_4-1.3 rim	7.80056	0.333684		9.493	0.208	2.24089	2.31516	0.967923	04:01	-5574	3115									Proximal to <85% Concordant U-Pb Analysis
506	5M_4-1.4 core	6.59156	0.333684		8.284	0.16	2.2403	2.31727	0.966783	04:04	-5478	3087
507	5M_4-1.5 rim	7.48656	0.333684		9.179	0.214	2.25138	2.32279	0.96926	04:08	-5571	3145									Proximal to <85% Concordant U-Pb Analysis
508	5M_4-1.6 core	7.54856	0.333684		9.241	0.197	2.24738	2.33135	0.963983	04:11	-5431	3082									Proximal to <85% Concordant U-Pb Analysis
509	5M_4-1.7 core	6.72756	0.333684		8.42	0.248	2.24522	2.33041	0.963443	04:14	-5512	3118
510	5M_4-1.8 core	6.53756	0.333684		8.23	0.268	2.26194	2.33163	0.970113	04:18	-5527	3091
511	5M_4-1.9 rim	7.62856	0.333684		9.321	0.189	2.25483	2.32791	0.968608	04:21	-5570	3097									Proximal to <85% Concordant U-Pb Analysis
512	KIM-5.15				7.041	0.242	2.26911	2.33808	0.970503	04:39	-264	5209
513	KIM-5.16				6.777	0.224	2.29617	2.37454	0.967	04:42	-264	5209
514	KIM-5.17				6.943	0.21	2.28594	2.3867	0.957784	04:45	-252	5180
515	KIM-5.18				6.602	0.249	2.30057	2.38604	0.96418	04:48	-187	5210
516	KIM-5.19				6.632	0.23	2.27693	2.38619	0.954211	04:51	-246	5151
	average				6.799	0.38273
sample: W74/4
517	KIM-5.5				6.549	0.217	2.26623	2.34735	0.965442	05:47	-2822	2442
518	KIM-5.6				6.398	0.241	2.27736	2.36984	0.960976	05:50	-2822	2442
519	KIM-5.7				6.769	0.188	2.28335	2.37989	0.959435	05:53	-2839	2253
520	KIM-5.8				6.201	0.187	2.27787	2.3874	0.954121	05:56	-2847	2247
521	KIM-5.9				6.309	0.246	2.25627	2.39409	0.942432	05:59	-2812	2247
	average				6.4452	0.442756
522	1.1	6.70989	0.443638		8.152	0.169	2.2654	2.35185	0.963243	06:03	-2687	-3582
523	1.2	6.62689	0.443638		8.069	0.221	2.25354	2.37293	0.949687	06:06	-2680	-3468
524	1.3	6.22289	0.443638		7.665	0.246	2.28195	2.37669	0.960138	06:09	-2628	-3566
525	2.1	6.35789	0.443638		7.8	0.208	2.27826	2.35197	0.968661	06:13	-2948	-2798
526	2.2	6.64689	0.443638		8.089	0.249	2.28936	2.37145	0.965385	06:17	-2910	-2713
527	3.1	6.05589	0.443638		7.498	0.197	2.25907	2.3531	0.96004	06:21	-3561	-3274
528	3.2	6.31389	0.443638		7.756	0.2	2.27606	2.37723	0.957439	06:24	-3621	-3393									Proximal to <85% Concordant U-Pb Analysis
529	3.3	6.46089	0.443638		7.903	0.211	2.23034	2.3743	0.939367	06:27	-3504	-3351									Proximal to <85% Concordant U-Pb Analysis
530	3.4	6.26489	0.443638		7.707	0.245	2.27485	2.36906	0.960233	06:31	-3714	-3359									Proximal to <85% Concordant U-Pb Analysis
531	4.1	6.17089	0.443638		7.613	0.187	2.27528	2.3486	0.96878	06:35	-3508	-4892
532	4.2	6.29489	0.443638		7.737	0.214	2.25368	2.36671	0.952242	06:38	-3452	-4927
533	5.1	6.56889	0.443638		8.011	0.29	2.24514	2.34352	0.958022	06:43	-2110	-4488
534	5.2	7.02889	0.443638		8.471	0.201	2.28164	2.363	0.965569	06:46	-2069	-4414
535	5.3	6.66889	0.443638		8.111	0.249	2.27051	2.36632	0.959511	06:50	-2119	-4538
536	5.4	6.40989	0.443638		7.852	0.198	2.28107	2.34731	0.97178	06:54	-2006	-4471
537	KIM-5.10				6.54	0.277	2.31343	2.34813	0.985221	06:58	-2895	2269
538	KIM-5.11				6.861	0.179	2.29061	2.37477	0.964562	07:01	-2895	2269
539	KIM-5.12				6.734	0.301	2.28045	2.38298	0.956971	07:04	-2931	2253
540	KIM-5.13				6.428	0.252	2.28986	2.38549	0.959913	07:07	-2913	2204
	average				6.64075	0.387503
541	6.1	6.64556	0.551255		7.969	0.273	2.28864	2.3468	0.975218	07:11	998	2393
542	6.2	6.36456	0.551255		7.688	0.279	2.25176	2.36041	0.953969	07:15	1020	2467
543	6.3	6.75056	0.551255		8.074	0.242	2.28485	2.37086	0.963722	07:18	970	2371
544	7.1	5.79156	0.551255		7.115	0.163	2.25907	2.34958	0.96148	07:22	783	2704
545	7.2	6.02156	0.551255		7.345	0.229	2.26645	2.36487	0.958383	07:25	760	2766
546	7.3	6.62356	0.551255		7.947	0.157	2.26804	2.35787	0.9619	07:29	676	2717
547	7.4	5.73156	0.551255		7.055	0.274	2.25965	2.34715	0.962719	07:32	714	2790
548	8.1 core	6.44356	0.551255		7.767	0.271	2.28049	2.33753	0.975599	07:37	-253	1315
549	8.2 rim	6.36856	0.551255		7.692	0.169	2.25236	2.35826	0.955092	07:40	-354	1324
550	8.3 core	6.04356	0.551255		7.367	0.204	2.25183	2.36702	0.951334	07:43	-213	1296
551	8.4 rim	6.23056	0.551255		7.554	0.284	2.27563	2.36167	0.96357	07:47	-375	1348
552	KIM-5.14				6.412	0.255	2.26555	2.35584	0.961676	07:50	-2893	2368
553	KIM-5.15				6.28	0.289	2.26206	2.35384	0.961008	07:54	-2893	2368
554	KIM-5.16				6.359	0.214	2.24746	2.37004	0.948281	07:57	-2901	2454
555	KIM-5.17				5.988	0.222	2.26307	2.37684	0.952134	08:00	-2770	2353
556	KIM-5.18				6.119	0.225	2.22401	2.37004	0.938386	08:03	-2719	2326
	average				6.2316	0.350909
sample: 01JH-60b
557	KIM-5.1 NMR=0.1004884				6.992	0.217	2.51103	2.53299	0.99133	17:26	-562	-5776
558	KIM-5.2				7.079	0.169	2.51612	2.5369	0.991807	17:30	-593	-5782
559	KIM-5.3				7.14	0.2	2.52207	2.55353	0.98768	17:33	-580	-5810
560	KIM-5.4				6.931	0.155	2.51455	2.54234	0.989069	17:36	-553	-5797
561	average				7.0355	0.0924211
562	5M 10-3.6 see other anal.	7.83513	0.46413		9.576	0.278	2.51068	2.50643	1.00169	17:42	-3892	-2276
563	5M 10-3.7	7.69212	0.46413		9.433	0.209	2.48722	2.52067	0.986731	17:45	-3934	-2273
564	5M 10-3.8	7.50712	0.46413		9.248	0.163	2.48555	2.52443	0.984598	17:49	-3924	-2236									Irregular Texture/Zoning: Alteration Suspected
565	5M 10-3.9	7.99313	0.46413		9.734	0.187	2.48931	2.51003	0.991743	17:53	-3964	-2282									Irregular Texture/Zoning: Alteration Suspected
566	5M 10-3.10	7.81712	0.46413		9.558	0.179	2.48558	2.51461	0.988458	17:56	-3902	-2254
	average	7.76893	0.362504
567	KIM-5.5				6.728	0.208	2.48096	2.50276	0.99129	18:01	-677	-5794
568	KIM-5.6				6.579	0.152	2.45801	2.53593	0.969276	18:04	-650	-5785
569	KIM-5.7				6.565	0.197	2.47394	2.53753	0.974938	18:07	-708	-5788
570	KIM-5.8				6.633	0.26	2.47498	2.5346	0.976477	18:10	-734	-5793
	average				13.2525	0.073898
571	KIM-5.9 NMR=0.1004891				6.801	0.236	2.4673	2.49959	0.987081	18:17	-490	-5807
572	2.5NM 7-3.3 see other analyses	6.34925	0.298516		7.997	0.259	2.46601	2.47322	0.997082	18:26	-5237	3329
573	2.5NM 7-3.4	6.26825	0.298516		7.916	0.169	2.45838	2.49266	0.986248	18:29	-5245	3363
574	2.5NM 7-3.5	6.54125	0.298516		8.189	0.194	2.46691	2.49411	0.989095	18:33	-5277	3365
575	2.5NM 9-4.4 see other analyses	5.40625	0.298516		7.054	0.22	2.46491	2.46806	0.998724	18:38	-4511	4450
576	2.5NM 9-4.5	5.62925	0.298516		7.277	0.142	2.43311	2.48038	0.980941	18:41	-4554	4293
577	2.5NM 9-4.6	5.54425	0.298516		7.192	0.212	2.40562	2.48156	0.969399	18:45	-4566	4323
578	KIM-5.10				6.907	0.239	2.46139	2.47956	0.99267	18:49	-606	-5974
579	KIM-5.11				6.695	0.202	2.45002	2.48574	0.985631	18:52	-610	-5997
580	KIM-5.12				6.833	0.219	2.44756	2.49798	0.979813	18:55	-579	-5989
581	KIM-5.13				6.962	0.201	2.45714	2.50725	0.98001	18:58	-570	-5964
	average				6.84925	0.231242
Session #2 Date: 1/6 to 1/7/2016
sample: WI-STD-74
65	WI-STD-74 KIM-5 g1				6.559	0.204	2.56229	1.73057	1.4806	16:51	-2111	384	1	-11	-2598356	-54760	0.00090398
66	WI-STD-74 KIM-5 g1				6.618	0.255	2.55531	1.73347	1.4741	16:55	-1994	345	1	-13	-2598356	-54760	0.000957205
67	WI-STD-74 KIM-5 g1 Cs-Res=184				6.693	0.223	2.69991	1.83122	1.47438	17:02	-1954	389	1	-13	-2598356	-54760	0.000887016
68	WI-STD-74 KIM-5 g1				6.923	0.178	2.73578	1.85926	1.47143	17:06	-1973	515	1	-13	-2598356	-54760	0.000875407
	average and 2SD				6.69825	0.319104
78	WI-STD-74 KIM-5 g1				6.98	0.195	2.69495	1.8383	1.466	17:43	-2293	315	0	-14	-2598356	-54760	0.000816648
79	WI-STD-74 KIM-5 g2				7.028	0.203	2.6849	1.83861	1.46028	17:46	-3407	285	3	-14	-2598356	-54760	0.00085359
80	WI-STD-74 KIM-5 g3				6.699	0.215	2.6695	1.82617	1.4618	17:50	-4060	-62	0	-15	-2598356	-54760	0.000858532
81	WI-STD-74 KIM-5 g4				7.069	0.177	2.6532	1.82441	1.45428	17:54	-4987	-148	-4	-12	-2598356	-54760	0.000850176
	average and 2SD	5.09		1.84461	6.944	0.334668
86	WI-STD-74 KIM-5 g1				6.598	0.18	2.68546	1.84049	1.4591	08:16	-2130	354	-10	-8	-2635140	-51733	0.000407301
87	WI-STD-74 KIM-5 g2				6.455	0.243	2.66257	1.83806	1.44857	08:20	-3416	-12	-11	-9	-2635140	-51733	0.000420181
88	WI-STD-74 KIM-5 g3				6.521	0.26	2.64735	1.83157	1.4454	08:24	-4238	-307	-13	-10	-2635140	-51733	0.0004078
89	WI-STD-74 KIM-5 g4				6.591	0.251	2.65577	1.83267	1.44913	08:27	-5075	-482	-10	-8	-2635140	-51733	0.000393926
	average and 2SD	5.09		1.4439	6.54125	0.134386
sample: 01JH-13a
92	01JH-13a KIM-5 1				6.568	0.231	2.59359	1.79273	1.44673	08:56	447	6892	-12	-9	-2635140	-51733	0.000640056
93	01JH-13a KIM-5 2;				6.512	0.252	2.57838	1.7871	1.44278	09:00	484	6890	-15	-12	-2635140	-51733	0.00065017
94	01JH-13a KIM-5 3; Cs-Res=185				6.46	0.183	2.69724	1.86032	1.44988	09:06	506	6878	-15	-12	-2635140	-51733	0.000638427
95	01JH-13a KIM-5 4 EGun-HV=9998				6.295	0.162	2.74363	1.8789	1.46023	09:10	527	6876	-14	-11	-2635140	-51733	0.000644281
	average and 2SD				6.45875	0.235476
97	01JH-13a 2.5NM 2-2 zrc	6.3	0.23	1.3	7.606	0.148	2.74573	1.88899	1.45354	09:19	-1718	5354	-17	-12	-2635140	-51733	0.000910316			0.000226605
100	01JH-13a 2.5NM 9-1 zrc	6.16748	0.231626	1.29852	7.474	0.185	2.66808	1.84776	1.44395	09:39	-1843	2265	-19	-14	-2635140	-51733	0.000818736			0.000135025
102	01JH-13a 2.5M 2-1 zrc	6.34724	0.231626	1.29852	7.654	0.246	2.6502	1.82891	1.44906	09:49	-2941	-420	-17	-10	-2635140	-51733	0.000844353			0.000160642
106	01JH-13a KIM-5 5;				6.335	0.237	2.63789	1.80779	1.45918	10:08	547	6879	-15	-13	-2635140	-51733	0.000719253
107	01JH-13a KIM-5 6;				6.245	0.224	2.62029	1.8018	1.45426	10:11	566	6881	-14	-13	-2635140	-51733	0.00072626
108	01JH-13a KIM-5 7;				6.306	0.224	2.60698	1.79551	1.45195	10:15	583	6883	-15	-13	-2635140	-51733	0.000723077
109	01JH-13a KIM-5 8;				6.657	0.27	2.56186	1.45302	1.76313	10:18	599	6886	-14	-14	-2635140	-51733	0.000736543
110	01JH-13a KIM-5 9 Cs-Res=186				6.44	0.19	2.67784	1.83345	1.46055	10:23	618	6888	-15	-14	-2635140	-51733	0.000728164
	average and 2SD				6.3315	0.16296
	bracket average and 2SD	5.09		1.29852	6.39512	0.231626											0.000683711	12.7198
111	01JH-13a 2.5M 7-6 zrc	6.4392	0.139146	1.24379	7.691	0.168	2.74203	1.87812	1.45999	10:29	-3878	-2756	-10	-8	-2635140	-51733	0.000794596			7.40175e-05
113	01JH-13a 2.5M 10-1 zrc	5.8779	0.139146	1.24379	7.129	0.223	2.73263	1.89443	1.44245	10:40	-1757	-3711	-19	-12	-2635140	-51733	0.000746742			2.61634e-05
115	01JH-13a 10M 4-1 zrc	6.30436	0.139146	1.24379	7.556	0.2	2.70221	1.85132	1.45961	10:54	2164	4752	-9	-16	-2635140	-51733	0.000816154			9.55754e-05
117	01JH-13a 10M 9-2 zrc	6.32434	0.139146	1.24379	7.576	0.194	2.73247	1.86963	1.46151	11:04	2962	2586	-11	-14	-2635140	-51733	0.000886951			0.000166373
118	01JH-13a KIM-5 10				6.385	0.232	2.72936	1.87057	1.45911	11:09	455	6851	-5	-10	-2635140	-51733	0.000691942
119	01JH-13a KIM-5 11				6.416	0.209	2.71126	1.86724	1.45201	11:13	483	6845	-6	-12	-2635140	-51733	0.000715927
120	01JH-13a KIM-5 12				6.33	0.197	2.70759	1.864	1.45257	11:16	511	6840	-4	-12	-2635140	-51733	0.000736969
121	01JH-13a KIM-5 13				6.264	0.229	2.69424	1.85743	1.45053	11:19	537	6837	-4	-13	-2635140	-51733	0.000723037
	average and 2SD				6.34875	0.13352
	bracket average and 2SD	5.09		1.24379	6.34012	0.139146											0.000720579	3.65551
sample: 01JH-13b
122	01JH-13b KIM-5 1 Egun-HV=9999				6.493	0.243	2.68358	1.84248	1.4565	11:37	220	6478	-14	7	-2635140	-51733	0.000649042
123	01JH-13b KIM-5 2				6.568	0.163	2.68025	1.84209	1.455	11:40	214	6446	-15	6	-2635140	-51733	0.000662935
124	01JH-13b KIM-5 3 Egun-HV=9998				6.289	0.273	2.70161	1.84534	1.46402	11:44	243	6473	-14	6	-2635140	-51733	0.000666703
125	01JH-13b KIM-5 4				6.437	0.165	2.68233	1.83576	1.46116	11:47	240	6448	-14	6	-2635140	-51733	0.000696741
	average and 2SD				6.44675	0.236138
127	01JH-13b 2.5M 10-4 zrc	6.00367	0.40522	1.18024	7.191	0.244	2.63922	1.80337	1.46349	11:57	-4552	-2002	-19	3	-2635140	-51733	0.0008827			0.000179689
128	01JH-13b 2.5M 5-2 zrc	6.61095	0.40522	1.18024	7.799	0.238	2.63312	1.80173	1.46144	12:02	-3680	-1002	-20	2	-2635140	-51733	0.000752433			4.94227e-05
129	01JH-13b 2.5M 8-4 zrc	5.90579	0.40522	1.18024	7.093	0.247	2.64966	1.80787	1.46563	12:06	-1796	-1504	-26	4	-2635140	-51733	0.000969618			0.000266607
131	01JH-13b 5M 4-2 zrc	3.79528	0.40522	1.18024	4.98	0.209	2.64905	1.81901	1.45631	12:16	1143	-641	-15	2	-2635140	-51733	0.00122907			0.000526056
133	01JH-13b 5M 12-4 zrc	6.27136	0.40522	1.18024	7.459	0.279	2.63425	1.8002	1.46331	12:30	3149	-2261	-23	3	-2635140	-51733	0.000857134			0.000154124
134	01JH-13b 5M 12-2 zrc	5.95373	0.40522	1.18024	7.141	0.221	2.63755	1.79973	1.46552	12:35	298	-2344	-17	0	-2635140	-51733	0.00103218			0.000329167	Irregular Texture/Zoning: Alteration Suspected
135	01JH-13b 5M 13-2 zrc	5.81689	0.40522	1.18024	7.004	0.245	2.642	1.80806	1.46123	12:39	1009	-2443	-18	0	-2635140	-51733	0.000959675			0.000256664
137	01JH-13b 5M 22-1 zrc	6.18646	0.40522	1.18024	7.374	0.222	2.60885	1.8074	1.44343	12:49	-148	-4130	-20	-4	-2635140	-51733	0.000859103			0.000156092
138	01JH-13b KIM-5 5				6.09	0.284	2.65479	1.80298	1.47245	12:53	289	6463	-17	7	-2635140	-51733	0.000710135
139	01JH-13b KIM-5 6				6.191	0.186	2.64114	1.79922	1.46793	12:57	308	6463	-17	7	-2635140	-51733	0.00072941
140	01JH-13b KIM-5 7				6.032	0.213	2.62774	1.79226	1.46616	13:00	310	6442	-18	8	-2635140	-51733	0.000751572
141	01JH-13b KIM-5 8				6.11	0.17	2.62485	1.79089	1.46566	13:04	211	6425	-18	7	-2635140	-51733	0.000757545
	average and 2SD				6.10575	0.131518
	bracket average and 2SD	5.09		1.18024	6.27625	0.40522											0.00070301	11.7575
sample: 01JH-60b
	Cs-Res=187
146	01JH-60b KIM-5 1				6.445	0.201	2.76262	1.89505	1.45781	13:42	629	-5705	-10	-13	-2635140	-51733	0.000669873
147	01JH-60b KIM-5 2				6.188	0.198	2.75848	1.9012	1.45092	13:46	661	-5706	-11	-15	-2635140	-51733	0.000681239
148	01JH-60b KIM-5 3				6.413	0.287	2.76067	1.90241	1.45114	13:49	695	-5706	-10	-14	-2635140	-51733	0.000674813
149	01JH-60b KIM-5 4				6.446	0.179	2.75444	1.90534	1.44564	13:52	678	-5758	-10	-14	-2635140	-51733	0.00068383
	average and 2SD				6.373	0.248564
151	(01JH-60b 2.5NM 4-3 zrc)	4.55536	0.379726	1.13348	5.694	0.214	2.78589	1.91817	1.45236	14:01	-3737	2058	-20	-8	-2635140	-51733	0.000729371			3.27212e-05
153	01JH-60b 2.5NM 8-4 zrc	7.0765	0.379726	1.13348	8.218	0.153	2.77222	1.91657	1.44645	14:11	-3986	3749	-24	-9	-2635140	-51733	0.000797622			0.000100971
155	01JH-60b 2.5NM 8-10 zrc	5.39341	0.379726	1.13348	6.533	0.239	2.79923	1.92255	1.456	14:22	-1333	4068	-18	-7	-2635140	-51733	0.000984837			0.000288186
156	01JH-60b 2.5NM 9-3 zrc	6.39927	0.379726	1.13348	7.54	0.19	2.75299	1.90261	1.44696	14:30	-3582	4346	-19	-13	-2635140	-51733	0.000945624			0.000248973
159	01JH-60b 10M 9-1 zrc	4.52639	0.379726	1.13348	5.665	0.257	2.76273	1.90112	1.45321	14:53	2007	-1551	-7	-9	-2635140	-51733	0.000868854			0.000172203
160	01JH-60b KIM-5 5				6.192	0.169	2.76805	1.90296	1.45461	14:57	693	-5621	-19	-15	-2635140	-51733	0.000706662
161	01JH-60b KIM-5 6				5.935	0.223	2.77994	1.91919	1.44849	15:01	730	-5618	-20	-15	-2635140	-51733	0.00071037
162	01JH-60b KIM-5 7				6.054	0.178	2.77806	1.92001	1.4469	15:04	732	-5588	-20	-14	-2635140	-51733	0.000723197
163	01JH-60b KIM-5 8				6.161	0.229	2.76006	1.91923	1.43811	15:07	675	-5592	-19	-14	-2635140	-51733	0.000723219
	average and 2SD				6.0855	0.232909
	bracket average and 2SD	5.09		1.13348	6.22925	0.379726											0.00069665	6.22847
sample: 01JH-54a
164	01JH-54a KIM-5 1				6.035	0.151	2.86997	1.94301	1.47707	15:16	-4051	-562	-5	-1	-2635140	-51733	0.000634954
165	01JH-54a KIM-5 2				6.201	0.195	2.86278	1.94939	1.46855	15:20	-4015	-560	-5	-2	-2635140	-51733	0.000637707
166	01JH-54a KIM-5 3				5.967	0.233	2.85273	1.94939	1.4634	15:23	-3987	-556	-6	-2	-2635140	-51733	0.000645163
167	01JH-54a KIM-5 4				5.969	0.166	2.86903	1.95334	1.46879	15:27	-3957	-556	-6	-2	-2635140	-51733	0.000640878
	average and 2SD				6.043	0.219939
169	01JH-54a 2.5NM 34 zrc	5.62911	0.157407	0.961481	6.596	0.214	2.87443	1.96186	1.46515	15:37	3125	2205	3	-4	-2635140	-51733	0.000834145			0.000144834
171	01JH-54a 2.5M 58 zrc	6.66211	0.157407	0.961481	7.63	0.214	2.80755	1.93135	1.45367	15:48	658	1760	-5	-5	-2635140	-51733	0.000789096			9.9785e-05
173	01JH-54a 5M 66 zrc	6.32744	0.157407	0.961481	7.295	0.204	2.79033	1.91864	1.45432	15:59	-525	2491	-1	-3	-2635140	-51733	0.000921438			0.000232127
174	01JH-54a 10M D90 zrc	5.61412	0.157407	0.961481	6.581	0.236	2.75997	1.90018	1.45248	16:05	3481	-780	-22	-1	-2635140	-51733	0.000951578			0.000262268	Proximal to <85% Concordant U-Pb Analysis
175	01JH-54a KIM-5 5				6.045	0.233	2.79451	1.89967	1.47105	16:09	-4059	-531	-6	-3	-2635140	-51733	0.000706993
176	01JH-54a KIM-5 6				6.058	0.186	2.77948	1.89822	1.46426	16:13	-4029	-524	-6	-3	-2635140	-51733	0.000740677
177	01JH-54a KIM-5 7				6.042	0.147	2.77122	1.88852	1.4674	16:16	-4001	-521	-6	-3	-2635140	-51733	0.000752046
178	01JH-54a KIM-5 8				6.134	0.241	2.76742	1.88614	1.46724	16:20	-3977	-517	-7	-2	-2635140	-51733	0.000756068
	average and 2SD				6.06975	0.0867852
	bracket average and 2SD	5.09		0.961481	6.05638	0.157407											0.00068931	15.9884
sample: 01JH-60a
179	01JH-60a KIM-5 1				6.385	0.194	2.66741	1.8259	1.46087	16:32	-3764	1608	-16	-6	-2635140	-51733	0.00063536
180	01JH-60a KIM-5 2				5.976	0.276	2.66935	1.82719	1.46091	16:36	-3767	1571	-13	-5	-2635140	-51733	0.000639802
181	01JH-60a KIM-5 3				6.309	0.127	2.66992	1.82813	1.46047	16:39	-3728	1567	-11	-5	-2635140	-51733	0.000630727
182	01JH-60a KIM-5 4				6.203	0.224	2.67893	1.82918	1.46455	16:42	-3751	1537	-13	-7	-2635140	-51733	0.000646789
	average and 2SD				6.21825	0.355825
186	01JH-60a 47 zrc	6.20274	0.409007	1.01	7.219	0.273	2.69557	1.85238	1.45519	16:59	-1947	343	-16	-4	-2635140	-51733	0.000861407			0.000184625
190	01JH-60a 68 zrc	6.52141	0.409007	1.01	7.538	0.187	2.59631	1.79085	1.44976	17:19	-3248	-310	-20	-8	-2635140	-51733	0.00124377			0.000566985
191	01JH-60a KIM-5 5				5.932	0.201	2.62454	1.79942	1.45855	17:23	-3690	1561	-21	-8	-2635140	-51733	0.000693823
192	01JH-60a KIM-5 6				5.771	0.19	2.60568	1.80008	1.44753	17:26	-3693	1591	-22	-8	-2635140	-51733	0.000721359
193	01JH-60a KIM-5 7				6.172	0.225	2.62591	1.8027	1.45665	17:30	-3732	1608	-18	-8	-2635140	-51733	0.000706313
194	01JH-60a KIM-5 8				6.082	0.236	2.58931	1.81154	1.42934	17:33	-3745	1633	-22	-8	-2635140	-51733	0.00074008
	average and 2SD				5.98925	0.351967
	bracket average and 2SD	5.09		1.00862	6.10375	0.409007											0.000676782	12.862
Session #3 Date: 1/20/2016
sample: W74/3
235	W74/3 KIM-5 1				5.851	0.191	3.19322	2.18889	1.45883	16:55:00	-3769	423	17	-17	-2650364	-52217	0.000742057
236	W74/3 KIM-5 2				5.722	0.222	3.23228	2.21154	1.46155	16:58:00	-3762	393	17	-18	-2650364	-52217	0.000748836
237	W74/3 KIM-5 3				5.587	0.25	3.25874	2.2338	1.45883	17:02:00	-3739	395	17	-18	-2650364	-52217	0.000757443
238	W74/3 KIM-5 4				5.531	0.228	3.318	2.27076	1.46119	17:05:00	-3738	422	17	-18	-2650364	-52217	0.000763014
	average and 2SD				5.67275	0.286693
239	W74/3 32 zrc	6.04245	0.19788	0.581042	6.627	0.216	3.35401	2.314	1.44913	17:11	-1229	2694	16	-1	-2650364	-52217	0.00101129			0.000227517	Proximal to <85% Concordant U-Pb Analysis
242	W74/3 174 zrc Cs-Res=203	6.26132	0.19788	0.581042	6.846	0.27	3.22954	2.2363	1.44414	17:29	1228	-1936	16	-38	-2650364	-52217	0.000901905			0.000118135
246	W74/3 7 zrc	6.61312	0.19788	0.581042	7.198	0.22	3.43059	2.377	1.4431	17:48	1618	1143	23	-15	-2650364	-52217	0.000890327			0.000106556
247	W74/3 30 zrc	5.84756	0.19788	0.581042	6.432	0.278	3.51618	2.421	1.45255	17:53	-225	2973	16	4	-2650364	-52217	0.000901335			0.000117564
248	W74/3 74 zrc	6.58213	0.19788	0.581042	7.167	0.241	3.57714	2.461	1.45324	17:57	2058	1537	18	-12	-2650364	-52217	0.000869951			8.61807e-05	Proximal to <85% Concordant U-Pb Analysis
249	W74/3 134 zrc	7.04486	0.19788	0.581042	7.63	0.212	3.33246	2.332	1.42917	18:04	-666	-985	16	-29	-2650364	-52217	0.00094866			0.000164889
250	W74/3 KIM-5 5				5.667	0.249	3.38346	2.316	1.46087	18:08	-4113	838	16	-13	-2650364	-52217	0.000801198
251	W74/3 KIM-5 6				5.612	0.22	3.35771	2.311	1.45282	18:12	-4073	840	15	-13	-2650364	-52217	0.000814221
252	W74/3 KIM-5 7				5.7	0.227	3.33375	2.29771	1.4509	18:15	-4034	839	15	-14	-2650364	-52217	0.000823318
253	W74/3 KIM-5 8				5.722	0.223	3.34291	2.29552	1.45627	18:18	-4007	821	15	-13	-2650364	-52217	0.000820075
	average and 2SD				5.67525	0.0956852
	bracket average and 2SD	5.09		0.581042	5.674	0.19788											0.00078377	8.73234
Session #4 Date: 7/22/2016
sample: 01JH-13a
293	01JH-13a KIM-5				5.499	0.218	2.78987	1.87284	1.48965	08:33	184	5925	-5	-6	-1826420	-51742	0.000670412
294	01JH-13a KIM-5 2				5.594	0.232	2.75912	1.86192	1.48187	08:36	206	5923	-6	-7	-1826420	-51742	0.00070521
295	01JH-13a KIM-5 3				5.685	0.298	2.72144	1.84421	1.47567	08:40	227	5923	-6	-7	-1826420	-51742	0.000726683
296	01JH-13a KIM-5 4				5.686	0.249	2.71076	1.82688	1.48382	08:43	243	5922	-6	-8	-1826420	-51742	0.000748431
	average and 2SD	5.82718			5.616	0.178266											0.000712684	9.33082
297	01JH-13a 2.5NM 2-2 1	6.39521	0.345802	0.410162	6.808	0.238	2.65932	1.78807	1.48726	08:51	-2049	4451	-12	-12	-1826420	-51742	0.000797078			2.61073e-05
298	01JH-13a 2.5NM 2-2 2 Cs-Res=155	6.26827	0.345802	0.410162	6.681	0.253	2.86133	1.90217	1.50424	08:57	-2037	4440	-12	-12	-1826420	-51742	0.000774553			3.58232e-06
299	01JH-13a 2.5NM 2-2 3	6.24328	0.345802	0.410162	6.656	0.266	2.85932	1.92158	1.48801	09:01	-2011	4462	-12	-13	-1826420	-51742	0.000809206			3.82351e-05
300	01JH-13a 2.5NM 3-1	6.13532	0.345802	0.410162	6.548	0.277	2.83632	1.91571	1.48056	09:06	-593	4142	-11	-13	-1826420	-51742	0.000866075			9.51045e-05
301	01JH-13a 2.5NM 3-1 2, on crack			0.410162	6.826	0.25	2.81635	1.90405	1.47914	09:10	-611	4156	-10	-12	-1826420	-51742	0.00101605				Irregular Analysis: Fracture/Inclusion
302	01JH-13a 2.5NM 3-6	6.4402	0.345802	0.410162	6.853	0.237	2.79133	1.88105	1.48392	09:15	-2754	4124	-9	-14	-1826420	-51742	0.000882977			0.000112007
303	01JH-13a 2.5NM 3-6 2	6.30425	0.345802	0.410162	6.717	0.253	2.76991	1.8649	1.48529	09:19	-2733	4149	-9	-13	-1826420	-51742	0.00091568			0.000144709
304	01JH-13a 2.5NM 3-6 3	6.52616	0.345802	0.410162	6.939	0.271	2.73666	1.85128	1.47825	09:23	-2735	4101	-9	-14	-1826420	-51742	0.000945325			0.000174354
305	01JH-13a 2.5NM 4-4	5.9534	0.345802	0.410162	6.366	0.358	2.72395	1.83032	1.48824	09:29	-4177	3511	-15	-16	-1826420	-51742	0.000843288			7.23171e-05
306	01JH-13a 2.5NM 4-4 2	5.73149	0.345802	0.410162	6.144	0.249	2.70293	1.81287	1.49097	09:33	-4173	3526	-14	-16	-1826420	-51742	0.000858266			8.72953e-05
307	01JH-13a KIM-5 5				5.32	0.234	2.66357	1.79465	1.48417	09:37	326	5926	-12	-9	-1826420	-51742	0.000808236
308	01JH-13a KIM-5 6				5.55	0.264	2.63269	1.78131	1.47795	09:40	339	5926	-12	-8	-1826420	-51742	0.000858434
309	01JH-13a KIM-5 7 Cs-Res=156				5.189	0.233	2.82698	1.89247	1.4938	09:46	352	5927	-13	-9	-1826420	-51742	0.000845319
310	01JH-13a KIM-5 8				5.495	0.248	2.84734	1.91645	1.48574	09:49	368	5928	-12	-9	-1826420	-51742	0.000805038
	average and 2SD				5.3885	0.330489											0.000829257
	bracket average and 2SD	5.09		0.410162	5.50225	0.345802											0.00077097	17.7121
311	01JH-13a 2.5NM 5-3	6.01263	0.229905	0.264777	6.279	0.314	2.83816	1.9145	1.48246	09:57	-3406	3218	-12	-18	-1826420	-51742	0.000964126			0.000150699
312	01JH-13a 2.5NM 5-3 2, on crack			0.264777	6.361	0.264	2.82188	1.90937	1.47791	10:00	-3388	3222	-11	-17	-1826420	-51742	0.00105421				Irregular Analysis: Fracture/Inclusion
313	01JH-13a 2.5NM 5-3 3	5.64173	0.229905	0.264777	5.908	0.318	2.81572	1.90225	1.4802	10:03	-3369	3225	-12	-17	-1826420	-51742	0.00111479			0.00030136
314	01JH-13a 2.5NM 6-2	6.07961	0.229905	0.264777	6.346	0.214	2.79797	1.88614	1.48344	10:08	-4526	2631	-6	-17	-1826420	-51742	0.000822872			9.44519e-06
315	01JH-13a 2.5NM 6-2 2	6.25757	0.229905	0.264777	6.524	0.241	2.77773	1.87816	1.47896	10:11	-4532	2641	-5	-17	-1826420	-51742	0.000856129			4.27024e-05
316	01JH-13a 2.5NM 6-3	7.19432	0.229905	0.264777	7.461	0.254	2.77666	1.87018	1.4847	10:16	-550	3031	-11	-15	-1826420	-51742	0.000818431			5.00389e-06
317	01JH-13a 2.5NM 6-3 2	7.19132	0.229905	0.264777	7.458	0.271	2.76351	1.86036	1.48547	10:20	-528	3030	-11	-14	-1826420	-51742	0.000863777			5.03506e-05
318	01JH-13a 2.5NM 6-3 3	6.8954	0.229905	0.264777	7.162	0.27	2.76007	1.85281	1.48967	10:23	-576	3047	-11	-15	-1826420	-51742	0.000924627			0.0001112
319	01JH-13a 2.5NM 8-2	6.58548	0.229905	0.264777	6.852	0.221	2.71973	1.82652	1.48902	10:30	-3630	1657	-16	-15	-1826420	-51742	0.000790997			-2.24304e-05
320	01JH-13a 2.5NM 8-2 2	6.41952	0.229905	0.264777	6.686	0.238	2.7033	1.81753	1.48735	10:34	-3648	1673	-16	-16	-1826420	-51742	0.000821666			8.23899e-06
321	01JH-13a 2.5NM 9-1	6.61947	0.229905	0.264777	6.886	0.267	2.6738	1.79234	1.4918	10:38	-2242	1178	-13	-16	-1826420	-51742	0.000925392			0.000111965
322	01JH-13a 2.5NM 9-1 2 Cs-Res=157	6.69145	0.229905	0.264777	6.958	0.242	2.84131	1.87534	1.51509	10:43	-2218	1182	-14	-16	-1826420	-51742	0.000882918			6.94906e-05
323	01JH-13a KIM-5				5.358	0.237	2.87675	1.93358	1.48778	10:47	198	5840	-13	-10	-1826420	-51742	0.00079768
324	01JH-13a KIM-5				5.316	0.18	2.90169	1.94614	1.491	10:50	217	5839	-14	-10	-1826420	-51742	0.000793663
325	01JH-13a KIM-5				5.293	0.261	2.87961	1.94328	1.48183	10:54	253	5836	-13	-9	-1826420	-51742	0.000797322
326	01JH-13a KIM-5				5.328	0.285	2.85412	1.93237	1.477	10:57	272	5834	-13	-9	-1826420	-51742	0.000801724
	average and 2SD				5.32375	0.0541202											0.000797597
	bracket average and 2SD	5.09		0.264777	5.35613	0.229905											0.000813427	6.00465
327	01JH-13a 2.5M 1-3	6.41751	0.125459	0.273732	6.693	0.225	2.85735	1.91156	1.49477	11:02	-3318	-1080	-10	-14	-1826420	-51742	0.000792548			-1.02943e-05
328	01JH-13a 2.5M 1-3 2	6.40651	0.125459	0.273732	6.682	0.268	2.85447	1.90573	1.49783	11:06	-3312	-1060	-10	-15	-1826420	-51742	0.000830032			2.71898e-05
329	01JH-13a 2.5M 1-3 3	6.29954	0.125459	0.273732	6.575	0.299	2.82912	1.89772	1.4908	11:09	-3302	-1042	-10	-16	-1826420	-51742	0.000837276			3.44338e-05
330	01JH-13a 2.5M 2-1	6.4515	0.125459	0.273732	6.727	0.291	2.81159	1.88794	1.48924	11:14	-3398	-1436	-10	-14	-1826420	-51742	0.000845026			4.21832e-05
331	01JH-13a 2.5M 2-1 2	6.49749	0.125459	0.273732	6.773	0.15	2.79025	1.88649	1.47907	11:17	-3416	-1432	-10	-15	-1826420	-51742	0.000968794			0.000165952
332	01JH-13a 2.5M 3-3	6.25456	0.125459	0.273732	6.53	0.245	2.79005	1.87245	1.49006	11:22	-1077	-1988	-11	-16	-1826420	-51742	0.000855041			5.21986e-05
333	01JH-13a 2.5M 3-3 2	5.99963	0.125459	0.273732	6.275	0.285	2.78954	1.87131	1.49069	11:25	-1046	-1984	-12	-15	-1826420	-51742	0.000867711			6.48683e-05
334	01JH-13a 2.5M 3-3 3	6.31554	0.125459	0.273732	6.591	0.233	2.76107	1.86063	1.48394	11:29	-1077	-2004	-11	-15	-1826420	-51742	0.000881508			7.86652e-05
335	01JH-13a 2.5M 3-4, on crack			0.273732	6.917	0.237	2.7449	1.83908	1.49254	11:33	-2584	-1942	-7	-15	-1826420	-51742	0.00122503				Irregular Analysis: Fracture/Inclusion
336	01JH-13a 2.5M 3-4 2	6.23056	0.125459	0.273732	6.506	0.282	2.73783	1.8345	1.49241	11:37	-2522	-1953	-8	-15	-1826420	-51742	0.000846362			4.35199e-05
337	01JH-13a 2.5M 5-1	6.32254	0.125459	0.273732	6.598	0.265	2.71655	1.82386	1.48945	11:41	-2226	-2963	-8	-15	-1826420	-51742	0.000821539			1.86968e-05
338	01JH-13a 2.5M 5-1 2	6.34253	0.125459	0.273732	6.618	0.184	2.69577	1.80986	1.48949	11:44	-2223	-2946	-8	-15	-1826420	-51742	0.000866359			6.35171e-05
339	01JH-13a 2.5M 5-1 3	6.12759	0.125459	0.273732	6.403	0.209	2.66663	1.79605	1.48472	11:48	-2226	-2999	-8	-15	-1826420	-51742	0.000851465			4.86231e-05
340	01JH-13a KIM-5 Cs-Res=158				5.466	0.312	2.82733	1.89529	1.49176	11:55	196	5820	-12	-9	-1826420	-51742	0.000782975
341	01JH-13a KIM-5				5.449	0.269	2.84153	1.92369	1.47712	11:58	211	5817	-12	-9	-1826420	-51742	0.000795855
342	01JH-13a KIM-5				5.379	0.263	2.86519	1.9355	1.48034	12:02	225	5815	-12	-10	-1826420	-51742	0.000853161
343	01JH-13a KIM-5				5.332	0.256	2.86789	1.94395	1.47529	12:05	241	5815	-12	-10	-1826420	-51742	0.00080036
	average and 2SD				5.4065	0.124649											0.000808088
	bracket average and 2SD	5.09		0.273732	5.36512	0.125459											0.000802842	5.26292
344	01JH-13a 2.5M 5-5	6.35807	0.119355	0.34176	6.702	0.192	2.87188	1.93077	1.48743	12:10	-3845	-3020	-13	-13	-1826420	-51742	0.000827728			-1.65862e-05
345	01JH-13a 2.5M 5-5 2	6.18912	0.119355	0.34176	6.533	0.217	2.89327	1.93574	1.49466	12:14	-3822	-3025	-14	-13	-1826420	-51742	0.000851491			7.1768e-06
346	01JH-13a 2.5M 6-3	6.38006	0.119355	0.34176	6.724	0.231	2.85629	1.92549	1.48341	12:19	-5125	-3431	-18	-9	-1826420	-51742	0.00080355			-4.07642e-05
347	01JH-13a 2.5M 6-3 2	6.32208	0.119355	0.34176	6.666	0.184	2.83269	1.91504	1.47918	12:22	-5121	-3464	-17	-9	-1826420	-51742	0.000822983			-2.13306e-05
348	01JH-13a 2.5M 6-3 3	6.38306	0.119355	0.34176	6.727	0.245	2.84117	1.90886	1.48841	12:26	-5094	-3434	-18	-9	-1826420	-51742	0.000857804			1.34901e-05
349	01JH-13a 2.5M 6-6	5.10549	0.119355	0.34176	5.449	0.245	2.80854	1.89584	1.48143	12:31	-489	-3340	-15	-17	-1826420	-51742	0.000803384			-4.09295e-05
350	01JH-13a 2.5M 7-2	6.21012	0.119355	0.34176	6.554	0.235	2.81154	1.88422	1.49215	12:36	-5429	-3755	-17	-7	-1826420	-51742	0.000803529			-4.07849e-05
351	01JH-13a 2.5M 7-2 2, SE unusually high			0.34176	7.143	1.077	2.78174	1.88645	1.47459	12:40	-5444	-3784	-17	-7	-1826420	-51742	0.000840152				Irregular Analysis: Anomolous 2SE/Cycle-by-cycle trend
351	01JH-13a 2.5M 7-6	6.33907	0.119355	0.34176	6.683	0.276	2.78882	1.87777	1.48518	12:45	-4280	-3650	-20	-10	-1826420	-51742	0.000828186			-1.61274e-05
352	01JH-13a 2.5M 7-6 2	6.22311	0.119355	0.34176	6.567	0.251	2.78005	1.87252	1.48466	12:49	-4258	-3688	-19	-10	-1826420	-51742	0.000836572			-7.7417e-06
353	01JH-13a 2.5M 7-6 3	6.61298	0.119355	0.34176	6.957	0.239	2.75945	1.86947	1.47606	12:52	-4266	-3654	-19	-10	-1826420	-51742	0.000870081			2.57673e-05
355	01JH-13a KIM-5				5.414	0.229	2.73368	1.85852	1.47089	12:57	251	5817	-9	-10	-1826420	-51742	0.000854523
356	01JH-13a KIM-5				5.531	0.38	2.69426	1.8446	1.46062	13:00	266	5816	-9	-10	-1826420	-51742	0.000939174
357	01JH-13a KIM-5				5.445	0.255	2.70393	1.83544	1.47318	13:03	279	5816	-9	-10	-1826420	-51742	0.000884763
358	01JH-13a KIM-5				5.452	0.252	2.68212	1.82785	1.46736	13:06	293	5816	-9	-9	-1826420	-51742	0.0008437
	average and 2SD				5.4605	0.0996327											0.00088054
	bracket average and 2SD	5.09		0.34176	5.4335	0.119355											0.000844314	12.2956
359	01JH-13a 2.5M 10-1	5.55772	0.17	0.41	5.97	0.29	2.66664	1.80165	1.48012	13:18	-2120	-4697	-15	-16	-1826420	-51742	0.000803757			-2.56935e-05
360	01JH-13a 2.5M 10-1 2, off CL				4.761	0.286	2.68263	1.80349	1.48747	13:22	-2148	-4686	-14	-17	-1826420	-51742	0.000843211				Irregular Analysis
361	01JH-13a 2.5M 10-2	6.66898	0.172729	0.410287	7.082	0.332	2.66542	1.79547	1.48453	13:26	-2488	-4657	-14	-16	-1826420	-51742	0.000800177			-2.92735e-05
362	01JH-13a 2.5M 10-2 2 Cs-Res=159	6.43807	0.172729	0.410287	6.851	0.277	2.87896	1.92514	1.49546	13:32	-2491	-4638	-14	-16	-1826420	-51742	0.000800238			-2.92129e-05
363	01JH-13a 2.5M 10-2 3	6.603	0.172729	0.410287	7.016	0.211	2.90896	1.97489	1.47297	13:36	-2453	-4667	-14	-17	-1826420	-51742	0.000792046			-3.7405e-05
364	01JH-13a 2.5M 10-3	5.36351	0.172729	0.410287	5.776	0.242	2.90984	1.97919	1.47021	13:40	-1767	-4542	-15	-17	-1826420	-51742	0.000828639			-8.11838e-07
365	01JH-13a 2.5M 10-3 2	5.18659	0.172729	0.410287	5.599	0.321	2.94095	1.98189	1.48391	13:43	-1765	-4528	-15	-18	-1826420	-51742	0.000908433			7.89817e-05
366	01JH-13a 5M 3-2	6.42808	0.172729	0.410287	6.841	0.266	2.96488	1.99374	1.48709	13:49	1258	-2063	-11	-17	-1826420	-51742	0.000782135			-4.73157e-05
367	01JH-13a 5M 3-2 2	6.49305	0.172729	0.410287	6.906	0.249	2.95952	1.99441	1.48391	13:52	1273	-2046	-11	-17	-1826420	-51742	0.000824865			-4.58554e-06
368	01JH-13a 5M 3-2 3	6.54103	0.172729	0.410287	6.954	0.259	2.95021	1.98604	1.48547	13:55	1313	-2074	-11	-18	-1826420	-51742	0.000818756			-1.06949e-05
369	01JH-13a 5M 7-1	6.01624	0.172729	0.410287	6.429	0.227	2.92792	1.96452	1.49039	14:00	3471	-3650	-13	-15	-1826420	-51742	0.000770277			-5.91737e-05	Irregular Texture/Zoning: Alteration Suspected
370	01JH-13a 5M 7-1 2	5.59342	0.172729	0.410287	6.006	0.301	2.9172	1.9578	1.49004	14:04	3475	-3662	-13	-15	-1826420	-51742	0.000762343			-6.71084e-05	Irregular Texture/Zoning: Alteration Suspected
371	01JH-13a 10M 3-2	5.71637	0.172729	0.410287	6.129	0.219	2.90181	1.94442	1.49238	14:10	3923	4254	-12	-16	-1826420	-51742	0.000795424			-3.40266e-05
372	01JH-13a 10M 3-2 2	5.80133	0.172729	0.410287	6.214	0.231	2.87283	1.93452	1.48503	14:13	3951	4228	-12	-17	-1826420	-51742	0.00084942			1.99687e-05
373	01JH-13a 10M 3-2 3	6.1302	0.172729	0.410287	6.543	0.284	2.86404	1.93006	1.48391	14:17	3939	4254	-11	-16	-1826420	-51742	0.000829462			1.10625e-08
374	01JH-13a KIM-5				5.595	0.312	2.86442	1.93225	1.48242	14:22	296	5835	-9	-9	-1826420	-51742	0.00076058
375	01JH-13a KIM-5				5.659	0.231	2.8267	1.92079	1.47163	14:25	300	5856	-8	-9	-1826420	-51742	0.000773678
376	01JH-13a KIM-5				5.487	0.234	2.82247	1.91328	1.4752	14:29	318	5853	-9	-9	-1826420	-51742	0.000771133
377	01JH-13a KIM-5				5.436	0.186	2.81743	1.91168	1.4738	14:32	314	5834	-8	-8	-1826420	-51742	0.000808058
	average and 2SD				5.54425	0.202448											0.000778362
	bracket average and 2SD	5.09		0.410287	5.50237	0.172729											0.000829451	15.1524
378	01JH-13a 10M 4-1	6.22444	0.168289	0.497468	6.725	0.299	2.82063	1.90065	1.48404	14:37	1779	3802	-13	-15	-1826420	-51742	0.000785009			1.29759e-05
379	01JH-13a 10M 4-1 2	6.25442	0.168289	0.497468	6.755	0.222	2.8107	1.89455	1.48357	14:40	1780	3767	-13	-15	-1826420	-51742	0.000950036			0.000178003
380	01JH-13a 10M 6-1	5.66871	0.168289	0.497468	6.169	0.286	2.8121	1.88547	1.49146	14:45	2355	3144	-13	-17	-1826420	-51742	0.000733478			-3.85552e-05
381	01JH-13a 10M 6-1 2	5.34587	0.168289	0.497468	5.846	0.226	2.80619	1.88262	1.49058	14:49	2376	3152	-14	-17	-1826420	-51742	0.000771879			-1.53612e-07
382	01JH-13a 10M 6-1 3	5.53778	0.168289	0.497468	6.038	0.25	2.79341	1.8773	1.488	14:52	2391	3121	-14	-18	-1826420	-51742	0.000766487			-5.54571e-06
383	01JH-13a 10M 9-2	6.02254	0.168289	0.497468	6.523	0.263	2.8004	1.87425	1.49415	14:57	2799	1487	-14	-17	-1826420	-51742	0.000782853			1.08203e-05
384	01JH-13a 10M 9-2 2	6.24742	0.168289	0.497468	6.748	0.215	2.79049	1.87914	1.48498	15:00	2816	1495	-14	-17	-1826420	-51742	0.000845712			7.36795e-05
385	01JH-13a 10M 11-1	6.1045	0.168289	0.497468	6.605	0.291	2.80014	1.86619	1.50046	15:04	790	786	-6	-18	-1826420	-51742	0.00081301			4.09777e-05	Irregular Texture/Zoning: Alteration Suspected
386	01JH-13a 10M 11-1 2	6.1045	0.168289	0.497468	6.605	0.224	2.73827	1.83896	1.48903	15:08	768	780	-7	-18	-1826420	-51742	0.000887594			0.000115562	Irregular Texture/Zoning: Alteration Suspected
387	01JH-13a 10M 11-1 3	6.35337	0.168289	0.497468	6.854	0.344	2.75051	1.83779	1.49664	15:11	767	797	-6	-18	-1826420	-51742	0.000867223			9.51903e-05	Irregular Texture/Zoning: Alteration Suspected
388	01JH-13a KIM-5				5.623	0.334	2.71618	1.84112	1.47529	15:15	197	5882	-8	-10	-1826420	-51742	0.000755941
389	01JH-13a KIM-5				5.606	0.234	2.70529	1.8293	1.47886	15:18	214	5882	-9	-10	-1826420	-51742	0.000765518
390	01JH-13a KIM-5				5.649	0.268	2.69472	1.82418	1.47723	15:21	230	5879	-8	-10	-1826420	-51742	0.000774496
391	01JH-13a KIM-5				5.665	0.29	2.68943	1.81948	1.47813	15:25	205	5902	-8	-10	-1826420	-51742	0.000766859
	average and 2SD				5.63575	0.0526466											0.000765703
	bracket average and 2SD	5.09		0.497468	5.59	0.168289											0.000772033	4.11557
sample: 01JH-54a
392	01JH-54a KIM-5				5.37	0.255	2.66464	1.77783	1.49882	15:41	-4721	-558	-20	0	-1826420	-51742	0.000715981
393	01JH-54a KIM-5 Cs-Res=160				5.343	0.247	2.84686	1.8931	1.50381	15:47	-4700	-571	-20	-1	-1826420	-51742	0.000712267
394	01JH-54a KIM-5				5.34	0.195	2.87382	1.92588	1.49221	15:50	-4666	-567	-20	-1	-1826420	-51742	0.000719281
395	01JH-54a KIM-5				5.215	0.229	2.89446	1.93984	1.49211	15:54	-4639	-579	-20	-2	-1826420	-51742	0.000713706
																	0.000715309	0.855005
396	01JH-54a 10M D2	6.42267	0.285266	0.342134	6.767	0.292	2.91419	1.9486	1.49553	15:59	2600	-826	-22	-2	-1826420	-51742	0.000873343			0.000137976	Irregular Texture/Zoning: Alteration Suspected
397	01JH-54a 10M D2 2	6.3177	0.285266	0.342134	6.662	0.232	2.90207	1.94923	1.48883	16:03	2590	-813	-23	0	-1826420	-51742	0.000834857			9.94904e-05	Irregular Texture/Zoning: Alteration Suspected
398	01JH-54a 10M D7	5.26507	0.285266	0.342134	5.609	0.247	2.83123	1.94066	1.4589	16:07	3635	-130	-23	-3	-1826420	-51742	0.00118213			0.000446763
399	01JH-54a 10M D7 2, on crack + high OH/O			0.342134	5.794	0.277	2.8575	1.93413	1.47741	16:11	3644	-116	-23	-2	-1826420	-51742	0.00177777			0.0010424
400	01JH-54a 10M D90 outside CL domain	5.39702	0.285266	0.342134	5.741	0.247	2.86359	1.89932	1.50769	16:15	2881	-11	-18	0	-1826420	-51742	0.00171423			0.000978864	Proximal to <85% Concordant U-Pb Analysis
401	01JH-54a 2.5NM 10	6.51964	0.285266	0.342134	6.864	0.246	2.82871	1.92529	1.46924	16:21	3841	3233	-20	0	-1826420	-51742	0.000857723			0.000122357
402	01JH-54a 2.5NM 10 2	6.66858	0.285266	0.342134	7.013	0.307	2.81906	1.92619	1.46354	16:24	3846	3215	-20	0	-1826420	-51742	0.000861127			0.000125761
403	01JH-54a 2.5NM 10 3	6.78355	0.285266	0.342134	7.128	0.171	2.8073	1.91919	1.46275	16:28	3856	3229	-20	-1	-1826420	-51742	0.00100039			0.000265025
404	01JH-54a 2.5NM 17	5.23807	0.285266	0.342134	5.582	0.293	2.80559	1.90213	1.47497	16:32	3537	2849	-19	-1	-1826420	-51742	0.00094937			0.000214003	Irregular Texture/Zoning: Alteration Suspected
405	01JH-54a 2.5NM 17 2	5.06913	0.285266	0.342134	5.413	0.207	2.82977	1.89998	1.48937	16:36	3501	2854	-20	0	-1826420	-51742	0.00110838			0.000373012	Irregular Texture/Zoning: Alteration Suspected
406	01JH-54a 2.5NM 20	6.78954	0.285266	0.342134	7.134	0.3	2.79952	1.88708	1.48352	16:42	3110	3736	-17	1	-1826420	-51742	0.000890554			0.000155187
407	01JH-54a 2.5NM 20 2	6.98048	0.285266	0.342134	7.325	0.201	2.78446	1.88078	1.48049	16:46	3102	3749	-16	1	-1826420	-51742	0.000924857			0.00018949
408	01JH-54a 2.5NM 20 3	6.66958	0.285266	0.342134	7.014	0.243	2.77889	1.86498	1.49004	16:50	3089	3724	-17	1	-1826420	-51742	0.000885512			0.000150145
409	01JH-54a 2.5NM 34	6.13377	0.285266	0.342134	6.478	0.346	2.75145	1.85633	1.4822	16:54	2291	3064	-16	1	-1826420	-51742	0.000889677			0.000154311
410	01JH-54a 2.5NM 34 2	6.42867	0.285266	0.342134	6.773	0.271	2.71869	1.84796	1.47119	16:58	2313	3057	-15	0	-1826420	-51742	0.000932787			0.00019742
411	01JH-54a KIM-5				5.495	0.173	2.73323	1.83122	1.49257	17:02	-4579	-640	-13	-2	-1826420	-51742	0.000741154
412	01JH-54a KIM-5				5.501	0.245	2.72185	1.82293	1.49312	17:06	-4578	-621	-13	-2	-1826420	-51742	0.000754427
413	01JH-54a KIM-5				5.542	0.295	2.71581	1.82152	1.49096	17:09	-4569	-597	-14	-1	-1826420	-51742	0.000761993
414	01JH-54a KIM-5				5.665	0.244	2.70807	1.82375	1.48489	17:12	-4566	-578	-13	-1	-1826420	-51742	0.000764125
	average and 2SD				5.55075	0.157957											0.000755425
	bracket average and 2SD	5.09		0.342134	5.43388	0.285266											0.000735367	6.14209
415	01JH-54a 2.5M 37	10.1442	0.175892	0.4027	10.551	0.31	2.6933	1.80658	1.49083	17:18	1638	2388	-26	1	-1826420	-51742	0.000899832			0.000148356	Metamorphic Zircon
416	01JH-54a 2.5M 37 2	10.2832	0.175892	0.4027	10.69	0.264	2.66916	1.79719	1.48519	17:24	1635	2372	-26	2	-1826420	-51742	0.000938411			0.000186935	Metamorphic Zircon
417	01JH-54a 2.5M 37 3 Cs-Res=161 outside CL domain	9.90631	0.175892	0.4027	10.313	0.26	2.84526	1.9186	1.48299	17:30	1542	2493	-28	1	-1826420	-51742	0.000839983			8.85065e-05	Metamorphic Zircon
418	01JH-54a 2.5M 40	6.03687	0.175892	0.4027	6.442	0.25	2.92276	1.96382	1.4883	17:35	1202	4186	-21	5	-1826420	-51742	0.00089806			0.000146584
419	01JH-54a 2.5M 40 2	6.06886	0.175892	0.4027	6.474	0.27	2.94095	1.97778	1.48699	17:38	1211	4173	-21	5	-1826420	-51742	0.000914191			0.000162715
420	01JH-54a 2.5M 58	6.29876	0.175892	0.4027	6.704	0.234	2.90787	1.98248	1.46678	17:44	-130	2361	-21	4	-1826420	-51742	0.00083434			8.28639e-05
421	01JH-54a 2.5M 58 2, on crack			0.4027	7.643	0.291	3.06268	1.98138	1.54573	17:47	-109	2365	-20	3	-1826420	-51742	0.010202				Irregular Analysis: Fracture/Inclusion
422	01JH-54a 2.5M 58 3	6.87653	0.175892	0.4027	7.282	0.193	2.86273	1.97223	1.45152	17:51	-149	2367	-21	3	-1826420	-51742	0.000884562			0.000133086
423	01JH-54a 5M 66	6.33875	0.175892	0.4027	6.744	0.234	2.87147	1.95416	1.46941	17:56	-1294	3049	-16	1	-1826420	-51742	0.000830909			7.94332e-05
424	01JH-54a 5M 66 2	6.51967	0.175892	0.4027	6.925	0.201	2.85868	1.94731	1.46801	18:00	-1284	3059	-16	0	-1826420	-51742	0.000848638			9.71616e-05
425	01JH-54a 5M 68	6.31876	0.175892	0.4027	6.724	0.268	2.8787	1.94579	1.47945	18:04	-1226	3572	-16	4	-1826420	-51742	0.000836648			8.51723e-05
426	01JH-54a 5M 68 2	6.47669	0.175892	0.4027	6.882	0.243	2.8496	1.93034	1.47622	18:08	-1243	3586	-16	4	-1826420	-51742	0.000853675			0.000102199
427	01JH-54a 5M 78	7.11044	0.175892	0.4027	7.516	0.281	2.82673	1.89279	1.49342	18:13	-2892	2608	-17	4	-1826420	-51742	0.00114481			0.000393338
428	01JH-54a 5M 78 2	7.05146	0.175892	0.4027	7.457	0.32	2.78784	1.88367	1.48	18:16	-2862	2638	-17	4	-1826420	-51742	0.000925032			0.000173556
429	01JH-54a 5M 81	6.50468	0.175892	0.4027	6.91	0.262	2.74476	1.87374	1.46486	18:20	-2944	3533	-16	8	-1826420	-51742	0.000868388			0.000116912
430	01JH-54a 5M 81 2	6.39972	0.175892	0.4027	6.805	0.23	2.73478	1.86298	1.46796	18:24	-2940	3546	-16	8	-1826420	-51742	0.000882726			0.00013125
431	01JH-54a KIM-5				5.381	0.27	2.76372	1.8525	1.49189	18:28	-4729	-639	-12	-1	-1826420	-51742	0.000739136
432	01JH-54a KIM-5				5.476	0.247	2.74146	1.8451	1.4858	18:32	-4693	-606	-13	-2	-1826420	-51742	0.000750423
433	01JH-54a KIM-5				5.397	0.244	2.72585	1.83642	1.48433	18:36	-4644	-608	-13	-2	-1826420	-51742	0.000743925
434	01JH-54a KIM-5				5.501	0.241	2.7172	1.82699	1.48725	18:39	-4626	-620	-13	-2	-1826420	-51742	0.000756625
	average and 2SD				5.43875	0.117421											0.000747527
	bracket average and 2SD	5.09		0.4027	5.49475	0.175892											0.000751476	2.51029
sample: 01JH-13b
435	01JH-13b KIM-5				5.543	0.223	2.68	1.80063	1.48837	18:49	513	6198	-21	7	-1826420	-51742	0.000701087
436	01JH-13b KIM-5				5.584	0.245	2.66404	1.79461	1.48447	18:52	515	6216	-21	6	-1826420	-51742	0.000720349
437	01JH-13b KIM-5				5.56	0.273	2.85585	1.90511	1.49905	18:58	514	6233	-22	7	-1826420	-51742	0.000699221
438	01JH-13b KIM-5				5.302	0.267	2.90166	1.94168	1.49441	19:01	516	6248	-22	6	-1826420	-51742	0.000703019
	average and 2SD				5.49725	0.262498											0.000705919	2.76076
439	01JH-13b 2.5NM 1-1	6.14138	0.300125	0.354446	6.498	0.208	2.89516	1.96257	1.47519	19:06	-3360	5781	-23	3	-1826420	-51742	0.000737212			2.87114e-05
440	01JH-13b 2.5NM 1-1 2	6.14338	0.300125	0.354446	6.5	0.184	2.92453	1.96554	1.4879	19:10	-3344	5795	-23	4	-1826420	-51742	0.00077118			6.26788e-05
441	01JH-13b 2.5NM 1-1 3	6.3623	0.300125	0.354446	6.719	0.252	2.86299	1.9623	1.459	19:13	-3348	5767	-23	1	-1826420	-51742	0.000797568			8.90671e-05
442	01JH-13b 2.5NM 1-2 high OH/O + crack			0.354446	7.196	0.21	2.88436	1.95615	1.47451	19:17	-2216	5648	-24	5	-1826420	-51742	0.00171292				Irregular Analysis: Fracture/Inclusion
443	01JH-13b 2.5NM 1-2 2	7.195	0.300125	0.354446	7.552	0.197	2.85332	1.95119	1.46235	19:20	-2169	5635	-23	5	-1826420	-51742	0.000768125			5.9624e-05
444	01JH-13b 2.5NM 2-1	6.26233	0.300125	0.354446	6.619	0.238	2.89155	1.93984	1.49061	19:24	-2727	5556	-23	5	-1826420	-51742	0.000762905			5.44046e-05
445	01JH-13b 2.5NM 2-1 2	6.30632	0.300125	0.354446	6.663	0.261	2.86948	1.93159	1.48555	19:28	-2689	5560	-23	5	-1826420	-51742	0.000728334			1.98337e-05
446	01JH-13b 2.5NM 2-1 3	6.53624	0.300125	0.354446	6.893	0.206	2.84673	1.92619	1.47791	19:31	-2688	5543	-23	4	-1826420	-51742	0.000744046			3.55451e-05
447	01JH-13b 2.5NM 3-1	6.29032	0.300125	0.354446	6.647	0.192	2.80867	1.91289	1.46829	19:35	-3738	5468	-23	2	-1826420	-51742	0.000904687			0.000196186
448	01JH-13b 2.5NM 3-1 2	6.39429	0.300125	0.354446	6.751	0.254	2.81441	1.90992	1.47357	19:38	-3732	5491	-23	3	-1826420	-51742	0.000761026			5.25255e-05
449	01JH-13b 2.5NM 4-2	6.88911	0.300125	0.354446	7.246	0.272	2.82357	1.90503	1.48217	19:43	-4367	5299	-22	0	-1826420	-51742	0.000803972			9.54715e-05
450	01JH-13b 2.5NM 4-2 2	6.83713	0.300125	0.354446	7.194	0.314	2.81136	1.90237	1.47782	19:46	-4382	5312	-23	1	-1826420	-51742	0.000750277			4.17761e-05
451	01JH-13b 2.5NM 4-2 3	7.47291	0.300125	0.354446	7.83	0.238	2.81726	1.89998	1.48278	19:49	-4357	5329	-22	2	-1826420	-51742	0.00072106			1.25594e-05
452	01JH-13b 2.5NM 6-4	6.73517	0.300125	0.354446	7.092	0.337	2.7617	1.87913	1.46966	19:54	-662	4659	-26	3	-1826420	-51742	0.000824671			0.000116171
453	01JH-13b 2.5NM 6-4 2	6.68918	0.300125	0.354446	7.046	0.221	2.7502	1.8701	1.47062	19:57	-684	4646	-26	4	-1826420	-51742	0.000791923			8.34221e-05
454	01JH-13b KIM-5				5.301	0.325	2.7582	1.86173	1.48152	20:01	544	6092	-26	6	-1826420	-51742	0.000710178
455	01JH-13b KIM-5				5.647	0.223	2.74945	1.85504	1.48215	20:04	551	6110	-25	6	-1826420	-51742	0.000714013
456	01JH-13b KIM-5				5.301	0.247	2.7531	1.85907	1.4809	20:07	580	6081	-26	6	-1826420	-51742	0.000696754
457	01JH-13b KIM-5				5.332	0.266	2.74861	1.85934	1.47827	20:11	599	6108	-26	6	-1826420	-51742	0.000723385
	average and 2SD				5.39525	0.336937											0.000711082
	bracket average and 2SD	5.09		0.354446	5.44625	0.300125											0.000708501	2.83137
462	01JH-13b KIM-5				5.418	0.22	2.97573	1.99124	1.49441	08:26	530	6094	-17	16	-1836628	-52499	0.000467462
463	01JH-13b KIM-5				5.36	0.25	2.94351	1.97157	1.49298	08:29	530	6079	-18	15	-1836628	-52499	0.000486149
464	01JH-13b KIM-5				5.43	0.287	2.9112	1.95666	1.48784	08:32	551	6078	-18	15	-1836628	-52499	0.000498116
465	01JH-13b KIM-5				5.245	0.182	2.88523	1.94512	1.48332	08:36	548	6061	-18	14	-1836628	-52499	0.000617001
	average and 2SD				5.36325	0.169103											0.000517182	47.1814
466	01JH-13b 2.5NM 7-1	8.10846	0.209465	0.344745	8.456	0.27	2.86295	1.92146	1.48999	08:40	-1281	4599	-18	13	-1836628	-52499	0.000595205			7.09458e-05
467	01JH-13b 2.5NM 7-1 2	7.93952	0.209465	0.344745	8.287	0.174	2.85033	1.90167	1.49886	08:44	-1284	4613	-18	14	-1836628	-52499	0.000611103			8.68436e-05
468	01JH-13b 2.5NM 7-1 3	8.07547	0.209465	0.344745	8.423	0.231	2.80254	1.88891	1.48368	08:47	-1263	4587	-18	13	-1836628	-52499	0.000608012			8.37527e-05
469	01JH-13b 2.5NM 7-5	6.47202	0.209465	0.344745	6.819	0.237	2.79485	1.8708	1.49393	08:51	-2029	4652	-17	12	-1836628	-52499	0.000630763			0.000106503
470	01JH-13b 2.5NM 7-5 2	6.65196	0.209465	0.344745	6.999	0.213	2.77113	1.85872	1.49088	08:54	-2010	4647	-17	13	-1836628	-52499	0.00063884			0.000114581
471	01JH-13b 2.5NM 8-1	6.17513	0.209465	0.344745	6.522	0.209	2.72413	1.84937	1.473	08:58	-2764	4436	-19	15	-1836628	-52499	0.000700549			0.00017629
472	01JH-13b 2.5NM 8-1 2	6.31108	0.209465	0.344745	6.658	0.275	2.71501	1.8331	1.48111	09:01	-2786	4445	-19	14	-1836628	-52499	0.000806978			0.000282718
473	01JH-13b 2.5NM 8-1 3, on crack			0.344745	5.811	0.241	2.69899	1.81624	1.48604	09:05	-2759	4420	-19	14	-1836628	-52499	0.00187259				Irregular Analysis: Fracture/Inclusion
474	01JH-13b 2.5NM 11-1	6.60098	0.209465	0.344745	6.948	0.202	2.68195	1.79148	1.49706	09:09	-4443	3977	-16	10	-1836628	-52499	0.000658061			0.000133801
475	01JH-13b 2.5NM 11-1 2 Cs-Res=162	6.43404	0.209465	0.344745	6.781	0.212	2.8698	1.9125	1.50055	09:15	-4424	3951	-16	9	-1836628	-52499	0.000600608			7.63487e-05
476	01JH-13b 2.5NM 16-2	6.57999	0.209465	0.344745	6.927	0.205	2.9116	1.93785	1.50249	09:19	-4294	2788	-17	11	-1836628	-52499	0.000658151			0.000133892
477	01JH-13b 2.5NM 16-2 2	6.39805	0.209465	0.344745	6.745	0.197	2.88395	1.9393	1.48711	09:23	-4254	2790	-17	11	-1836628	-52499	0.000690627			0.000166368
478	01JH-13b 2.5NM 17-1	6.77092	0.209465	0.344745	7.118	0.275	2.8767	1.92494	1.49444	09:27	-785	2475	-24	13	-1836628	-52499	0.000655849			0.00013159
479	01JH-13b 2.5NM 17-1 2	6.80791	0.209465	0.344745	7.155	0.216	2.86304	1.91852	1.49232	09:31	-810	2482	-23	13	-1836628	-52499	0.000644608			0.000120349
480	01JH-13b 2.5NM 17-1 3	6.85389	0.209465	0.344745	7.201	0.182	2.86085	1.90945	1.49826	09:34	-836	2485	-23	13	-1836628	-52499	0.000654536			0.000130276
481	01JH-13b KIM-5				5.461	0.177	2.84553	1.89908	1.49837	09:38	458	6094	-19	14	-1836628	-52499	0.000547211
482	01JH-13b KIM-5				5.602	0.253	2.83346	1.89408	1.49596	09:41	480	6091	-19	14	-1836628	-52499	0.000548764
483	01JH-13b KIM-5				5.505	0.249	2.81073	1.88684	1.48965	09:44	473	6124	-19	14	-1836628	-52499	0.000556965
484	01JH-13b KIM-5				5.471	0.253	2.79988	1.87421	1.4939	09:47	493	6081	-19	14	-1836628	-52499	0.00056515
	average and 2SD				5.50975	0.128638											0.000554523
	bracket average and 2SD	5.09		0.344745	5.4365	0.209465											0.00052426	18.6651
485	01JH-13b 2.5NM 18-1	6.69697	0.254994	0.328826	7.028	0.2	2.78256	1.84819	1.50556	09:53	-1431	2254	-22	14	-1836628	-52499	0.000751937			0.000188167
486	01JH-13b 2.5NM 18-1 2	6.57301	0.254994	0.328826	6.904	0.227	2.74974	1.83885	1.49536	09:56	-1464	2252	-23	13	-1836628	-52499	0.000704077			0.000140307
487	01JH-13b 2.5NM 18-2	5.9892	0.254994	0.328826	6.32	0.235	2.73895	1.82703	1.49913	10:00	-597	2214	-25	14	-1836628	-52499	0.000656068			9.22972e-05
488	01JH-13b 2.5NM 18-2 2	5.96721	0.254994	0.328826	6.298	0.195	2.73459	1.82281	1.5002	10:03	-577	2216	-25	14	-1836628	-52499	0.000666227			0.000102456
489	01JH-13b 2.5NM 18-2 3	6.0022	0.254994	0.328826	6.333	0.209	2.71009	1.81393	1.49405	10:07	-561	2212	-24	14	-1836628	-52499	0.000720152			0.000156382
490	01JH-13b 2.5NM 18-3	6.08417	0.254994	0.328826	6.415	0.253	2.69804	1.80388	1.49569	10:11	-1113	2250	-23	13	-1836628	-52499	0.0006945			0.000130729
491	01JH-13b 2.5NM 18-3 2	6.10317	0.254994	0.328826	6.434	0.297	2.68831	1.79425	1.49829	10:15	-1144	2247	-23	13	-1836628	-52499	0.000711465			0.000147694
492	01JH-13b 2.5NM 19-1 Cs-Res=163, on crack	5.93922	0.254994	0.328826	6.27	0.236	2.90789	1.91825	1.51591	10:20	-3219	2104	-19	11	-1836628	-52499	0.00092624				Irregular Analysis: Fracture/Inclusion
493	01JH-13b 2.5NM 19-1 2	6.05518	0.254994	0.328826	6.386	0.195	2.92422	1.95768	1.49372	10:24	-3231	2055	-20	12	-1836628	-52499	0.000666736			0.000102966
494	01JH-13b 2.5NM 19-1 3	5.91723	0.254994	0.328826	6.248	0.222	2.95114	1.97203	1.4965	10:27	-3251	2090	-20	12	-1836628	-52499	0.000648471			8.47004e-05
495	01JH-13b 2.5NM 19-2	6.63999	0.254994	0.328826	6.971	0.226	2.95585	1.97868	1.49385	10:31	-506	1970	-25	13	-1836628	-52499	0.000697867			0.000134097
496	01JH-13b 2.5NM 19-2 2	6.67698	0.254994	0.328826	7.008	0.243	2.95953	1.97947	1.49511	10:34	-583	1987	-25	13	-1836628	-52499	0.000701295			0.000137525
497	01JH-13b 2.5NM 19-4	6.58001	0.254994	0.328826	6.911	0.188	2.94768	1.97325	1.49382	10:39	-1965	2006	-23	14	-1836628	-52499	0.000683638			0.000119868
498	01JH-13b 2.5NM 19-4 2	6.35708	0.254994	0.328826	6.688	0.243	2.934	1.96926	1.4899	10:42	-1999	1997	-23	14	-1836628	-52499	0.000748688			0.000184918
499	01JH-13b 2.5NM 19-4 3	6.3041	0.254994	0.328826	6.635	0.226	2.92106	1.96159	1.48913	10:46	-1953	2008	-23	13	-1836628	-52499	0.000762041			0.00019827
500	01JH-13b KIM-5				5.251	0.165	2.92238	1.95299	1.49636	10:49	559	6204	-20	12	-1836628	-52499	0.000556494
501	01JH-13b KIM-5				5.295	0.214	2.92195	1.95357	1.4957	10:52	573	6247	-20	13	-1836628	-52499	0.000569318
502	01JH-13b KIM-5				5.282	0.218	2.91285	1.9499	1.49385	10:56	570	6270	-19	13	-1836628	-52499	0.00057971
503	01JH-13b KIM-5				5.497	0.239	2.8623	1.94074	1.47485	10:59	561	6300	-19	14	-1836628	-52499	0.000586551
	average and 2SD				5.33125	0.224062											0.000573018
	bracket average and 2SD	5.09		0.328826	5.4205	0.254994											0.00056377	5.02477
504	01JH-13b 2.5NM 20-3	6.38572	0.254483	0.31328	6.701	0.211	2.8998	1.92349	1.50757	11:05	-3761	1956	-20	12	-1836628	-52499	0.000680779			0.000103709
505	01JH-13b 2.5NM 20-3 2	6.40771	0.254483	0.31328	6.723	0.234	2.864	1.91497	1.49559	11:08	-3720	1912	-19	13	-1836628	-52499	0.000634582			5.75118e-05
506	(01JH-13b 2.5NM 20-2)	8.15616	0.254483	0.31328	8.472	0.189	2.86681	1.91051	1.50055	11:12	-3337	1859	-19	13	-1836628	-52499	0.000598789			2.17187e-05
507	(01JH-13b 2.5NM 20-2 2)	8.07019	0.254483	0.31328	8.386	0.21	2.84235	1.90534	1.49178	11:16	-3382	1867	-20	13	-1836628	-52499	0.000642255			6.5185e-05
508	(01JH-13b 2.5NM 20-2 3, on crack)			0.31328	8.527	0.248	2.83813	1.89353	1.49886	11:19	-3395	1840	-20	12	-1836628	-52499	0.00110286				Irregular Analysis: Fracture/Inclusion
509	01JH-13b 2.5NM 22-6, on crack			0.31328	6.264	0.237	2.83884	1.88156	1.50877	11:25	-1065	1386	-25	13	-1836628	-52499	0.000717358				Irregular Analysis: Fracture/Inclusion
510	01JH-13b 2.5NM 22-6 2	6.36473	0.254483	0.31328	6.68	0.245	2.80734	1.87898	1.49408	11:28	-1099	1386	-25	13	-1836628	-52499	0.000664201			8.71306e-05
511	01JH-13b 2.5NM 23-2	6.33274	0.254483	0.31328	6.648	0.245	2.81003	1.86365	1.50782	11:32	-1612	1197	-24	13	-1836628	-52499	0.000766497			0.000189427
512	01JH-13b 2.5NM 23-2 2	6.08581	0.254483	0.31328	6.401	0.249	2.80292	1.85508	1.51094	11:36	-1570	1195	-25	13	-1836628	-52499	0.000722818			0.000145748
513	01JH-13b 2.5NM 23-2 3, on crack			0.31328	6.568	0.231	2.79491	1.85473	1.50691	11:39	-1599	1167	-24	13	-1836628	-52499	0.00111309				Irregular Analysis: Fracture/Inclusion
514	01JH-13b 2.5NM 24-1	6.50168	0.254483	0.31328	6.817	0.218	2.77878	1.84624	1.5051	11:43	-1965	894	-24	15	-1836628	-52499	0.000691947			0.000114877
515	01JH-13b 2.5NM 24-1 2	6.64964	0.254483	0.31328	6.965	0.184	2.75461	1.83689	1.4996	11:46	-1988	886	-24	15	-1836628	-52499	0.000664673			8.7603e-05
516	01JH-13b 2.5NM 24-2	5.08313	0.254483	0.31328	5.398	0.261	2.74514	1.83094	1.4993	11:50	-3033	919	-22	14	-1836628	-52499	0.000657696			8.06259e-05	Irregular Texture/Zoning: Alteration Suspected
517	01JH-13b 2.5NM 24-2 2	4.90418	0.254483	0.31328	5.219	0.283	2.73209	1.8275	1.49499	11:54	-3071	944	-23	14	-1836628	-52499	0.000688843			0.000111773	Irregular Texture/Zoning: Alteration Suspected
518	01JH-13b 2.5NM 24-2 3	5.45801	0.254483	0.31328	5.773	0.213	2.72574	1.82246	1.49564	11:57	-3003	954	-22	13	-1836628	-52499	0.000697645			0.000120575	Irregular Texture/Zoning: Alteration Suspected
519	01JH-13b KIM-5				5.353	0.248	2.70002	1.81279	1.48942	12:01	661	6338	-19	13	-1836628	-52499	0.000583082
520	01JH-13b KIM-5				5.549	0.213	2.69462	1.8083	1.49014	12:04	659	6359	-19	13	-1836628	-52499	0.000573057
521	01JH-13b KIM-5				5.577	0.214	2.68086	1.80442	1.48572	12:07	658	6382	-19	13	-1836628	-52499	0.000577665
522	01JH-13b KIM-5				5.435	0.195	2.68171	1.80208	1.48812	12:11	656	6402	-20	13	-1836628	-52499	0.000590684
	average and 2SD				5.4785	0.207573											0.000581122
	bracket average and 2SD	5.09		0.31328	5.40487	0.254483											0.00057707	3.74714
523	01JH-13b 2.5NM 24-4	4.37941	0.142882	0.39984	4.781	0.238	2.70336	1.79402	1.50687	12:15	-1007	845	-27	14	-1836628	-52499	0.000647518			7.32363e-05
524	01JH-13b 2.5NM 24-4 2 Cs-Res=164	4.80524	0.142882	0.39984	5.207	0.284	2.90433	1.90609	1.52371	12:21	-988	859	-27	14	-1836628	-52499	0.000651646			7.73637e-05
525	01JH-13b 2.5NM 24-4 3	4.47737	0.142882	0.39984	4.879	0.214	2.91325	1.93554	1.50514	12:24	-1030	870	-27	14	-1836628	-52499	0.000622096			4.78145e-05
526	01JH-13b 2.5NM 24-7	6.26066	0.142882	0.39984	6.663	0.202	2.91443	1.94567	1.49791	12:28	-3597	938	-22	12	-1836628	-52499	0.000672729			9.84473e-05
527	01JH-13b 2.5NM 24-7 2	6.27865	0.142882	0.39984	6.681	0.245	2.91778	1.94677	1.49878	12:31	-3643	945	-22	13	-1836628	-52499	0.000721539			0.000147257
528	01JH-13b 2.5NM 25-5	5.95178	0.142882	0.39984	6.354	0.242	2.90096	1.93945	1.49577	12:35	-1883	652	-25	14	-1836628	-52499	0.000661703			8.74206e-05
529	01JH-13b 2.5NM 25-5 2	5.94778	0.142882	0.39984	6.35	0.286	2.90776	1.93589	1.50202	12:39	-1838	650	-25	14	-1836628	-52499	0.00067349			9.92075e-05
530	01JH-13b 2.5NM 25-7	5.78885	0.142882	0.39984	6.191	0.297	2.90279	1.9256	1.50747	12:44	-2579	663	-24	14	-1836628	-52499	0.000745806			0.000171524
531	01JH-13b 2.5NM 25-7 2	5.98777	0.142882	0.39984	6.39	0.23	2.87787	1.91657	1.50157	12:47	-2575	644	-24	13	-1836628	-52499	0.000696284			0.000122002
532	01JH-13b 2.5NM 25-7 3	5.67689	0.142882	0.39984	6.079	0.226	2.87211	1.91274	1.50157	12:50	-2552	658	-25	14	-1836628	-52499	0.000710843			0.000136561
533	01JH-13b 2.5NM 25-8	6.34862	0.142882	0.39984	6.751	0.257	2.88	1.90624	1.51082	12:54	-4448	682	-19	12	-1836628	-52499	0.000614608			4.03261e-05
534	01JH-13b 2.5NM 25-8 2	6.27665	0.142882	0.39984	6.679	0.198	2.88197	1.90526	1.51264	12:57	-4482	676	-19	12	-1836628	-52499	0.000640298			6.60155e-05
535	01JH-13b 2.5M 1-3	6.17169	0.142882	0.39984	6.574	0.277	2.83778	1.89869	1.4946	13:01	-1132	-244	-28	14	-1836628	-52499	0.000678298			0.000104016
536	01JH-13b 2.5M 1-3 2	6.10772	0.142882	0.39984	6.51	0.293	2.84113	1.89701	1.49769	13:04	-1163	-232	-28	14	-1836628	-52499	0.000643334			6.90517e-05
537	01JH-13b 2.5M 1-3 3	6.1457	0.142882	0.39984	6.548	0.225	2.84686	1.88688	1.50876	13:08	-1119	-222	-28	14	-1836628	-52499	0.000644977			7.06952e-05
538	01JH-13b KIM-5				5.54	0.218	2.78343	1.87428	1.48506	13:12	654	6314	-19	12	-1836628	-52499	0.000557625
539	01JH-13b KIM-5				5.483	0.291	2.78958	1.8717	1.4904	13:15	658	6299	-19	11	-1836628	-52499	0.000552767
540	01JH-13b KIM-5				5.489	0.232	2.77455	1.86791	1.48538	13:19	669	6314	-19	12	-1836628	-52499	0.000581213
541	01JH-13b KIM-5	6.73962			5.509	0.246	2.77094	1.86345	1.48699	13:22	678	6334	-19	12	-1836628	-52499	0.000578163
	average and 2SD				5.50525	0.0513907											0.000567442
	bracket average and 2SD	5.09		0.39984	5.49187	0.142882											0.000574282	4.48867
542	01JH-13b 2.5M 2-1	6.31478	0.121851	0.381807	6.699	0.232	2.78735	1.85156	1.50541	13:28	-1087	-527	-21	14	-1836628	-52499	0.000672677			0.00011183
543	01JH-13b 2.5M 2-1 2	6.50871	0.121851	0.381807	6.893	0.23	2.7769	1.85101	1.50021	13:31	-1038	-531	-21	14	-1836628	-52499	0.00065522			9.43737e-05
544	01JH-13b 2.5M 5-2	6.81959	0.121851	0.381807	7.204	0.265	2.76432	1.85046	1.49385	13:36	-3736	-1203	-17	13	-1836628	-52499	0.000627622			6.67757e-05
545	01JH-13b 2.5M 5-2 2	6.62366	0.121851	0.381807	7.008	0.244	2.75741	1.84647	1.49334	13:39	-3739	-1187	-17	13	-1836628	-52499	0.000644928			8.40817e-05
546	01JH-13b 2.5M 5-2 3	6.77561	0.121851	0.381807	7.16	0.248	2.73416	1.83994	1.486	13:43	-3758	-1215	-17	13	-1836628	-52499	0.000636111			7.52644e-05
547	01JH-13b 2.5M 5-3	6.68764	0.121851	0.381807	7.072	0.25	2.74854	1.83368	1.49892	13:47	-2262	-1214	-20	12	-1836628	-52499	0.000720597			0.00015975
548	01JH-13b 2.5M 5-3 2	6.71363	0.121851	0.381807	7.098	0.188	2.73122	1.82351	1.49778	13:50	-2226	-1194	-20	12	-1836628	-52499	0.000715318			0.000154471
549	01JH-13b 2.5M 6-3, on crack			0.381807	5.893	0.234	2.82266	1.8187	1.55202	13:54	-2659	-1408	-19	13	-1836628	-52499	0.00264517				Irregular Analysis: Fracture/Inclusion
550	01JH-13b 2.5M 6-3 2	6.38576	0.121851	0.381807	6.77	0.259	2.71179	1.81671	1.4927	13:58	-2638	-1416	-20	13	-1836628	-52499	0.000757731			0.000196885
551	01JH-13b 2.5M 6-3 3	6.55369	0.121851	0.381807	6.938	0.257	2.70299	1.81107	1.49248	14:02	-2643	-1396	-20	13	-1836628	-52499	0.00139808			0.000837232
552	01JH-13b 2.5M 8-4	5.88095	0.121851	0.381807	6.265	0.253	2.69855	1.79883	1.50017	14:06	-1749	-1833	-22	12	-1836628	-52499	0.000951602			0.000390755
553	01JH-13b 2.5M 8-4 2 Cs-Res=165, on crack			0.381807	4.953	0.19	2.92892	1.91876	1.52646	14:12	-1796	-1804	-23	13	-1836628	-52499	0.00205974				Irregular Analysis: Fracture/Inclusion
554	01JH-13b 2.5M 8-4 3, too close to FIB lift out			0.381807	5.769	0.172	2.88532	1.95557	1.47544	14:15	-1808	-1819	-22	12	-1836628	-52499	0.00283575				Irregular Analysis: Fracture/Inclusion
555	01JH-13b 2.5M 10-3	5.91194	0.121851	0.381807	6.296	0.263	2.96674	1.96523	1.50962	14:20	-4987	-2214	-17	12	-1836628	-52499	0.000640705			7.98583e-05
556	01JH-13b 2.5M 10-3 2	6.0069	0.121851	0.381807	6.391	0.237	2.93833	1.96609	1.49451	14:23	-4973	-2204	-17	12	-1836628	-52499	0.000627484			6.6637e-05
557	01JH-13b 2.5M 13-2	6.30978	0.121851	0.381807	6.694	0.172	2.94524	1.96229	1.50091	14:27	-4651	-2674	-19	12	-1836628	-52499	0.000678557			0.00011771
558	01JH-13b 2.5M 13-2 2, on crack	6.47672	0.121851	0.381807	6.861	0.187	2.93983	1.95572	1.50319	14:30	-4597	-2687	-18	12	-1836628	-52499	0.000750335			0.000189488
559	01JH-13b KIM-5				5.426	0.272	2.92059	1.95134	1.49671	14:34	618	6276	-13	11	-1836628	-52499	0.000561855
560	01JH-13b KIM-5				5.35	0.153	2.91578	1.95072	1.49472	14:38	585	6309	-13	13	-1836628	-52499	0.000553419
561	01JH-13b KIM-5				5.523	0.161	2.88069	1.93828	1.48621	14:41	569	6326	-13	13	-1836628	-52499	0.000549227
562	01JH-13b KIM-5				5.47	0.233	2.87776	1.93159	1.48984	14:44	602	6349	-12	13	-1836628	-52499	0.000552504
	average and 2SD				5.44225	0.146355											0.000554251
	bracket average and 2SD	5.09		0.381807	5.47375	0.121851											0.000560847	4.36977
563	01JH-13b 2.5M 16-1	5.62053	0.285519	0.411157	6.034	0.24	2.88043	1.91806	1.50174	14:51	-2961	-3099	-23	13	-1836628	-52499	0.000745885			4.20085e-05
564	01JH-13b 2.5M 16-1 2	5.7015	0.285519	0.411157	6.115	0.254	2.88276	1.91477	1.50554	14:54	-2930	-3112	-23	13	-1836628	-52499	0.00120186			0.000497982
565	01JH-13b 2.5M 16-1 3	6.29126	0.285519	0.411157	6.705	0.212	2.7929	1.91313	1.45986	14:58	-2983	-3091	-23	13	-1836628	-52499	0.00086708			0.000163204	Irregular Texture/Zoning: Alteration Suspected
566	01JH-13b 2.5M 18-1	6.23828	0.285519	0.411157	6.652	0.268	2.82997	1.89693	1.49187	15:03	-1411	-3373	-21	11	-1836628	-52499	0.000677928			0.000111156
567	01JH-13b 2.5M 18-1 2	6.48518	0.285519	0.411157	6.899	0.25	2.79195	1.88895	1.47804	15:06	-1413	-3406	-21	11	-1836628	-52499	0.000647249			8.04772e-05
568	01JH-13b 2.5M 19-3	6.61012	0.285519	0.411157	7.024	0.251	2.81674	1.88195	1.49671	15:10	-2950	-3544	-19	13	-1836628	-52499	0.000741328			3.74518e-05
569	01JH-13b 2.5M 19-3 2, near crack	6.1803	0.285519	0.411157	6.594	0.249	2.81231	1.87362	1.501	15:14	-2972	-3537	-19	13	-1836628	-52499	0.000732991			2.91149e-05
570	01JH-13b 2.5M 19-3 3	6.30125	0.285519	0.411157	6.715	0.256	2.78541	1.86865	1.4906	15:17	-2950	-3567	-19	11	-1836628	-52499	0.000743883			4.00069e-05
571	01JH-13b 2.5M 24-1	6.23628	0.285519	0.411157	6.65	0.195	2.76891	1.85293	1.49434	15:22	-5078	-4355	-16	14	-1836628	-52499	0.000867411			0.000163535
572	01JH-13b 2.5M 24-1 2	6.59213	0.285519	0.411157	7.006	0.254	2.77663	1.85465	1.49712	15:26	-5096	-4343	-16	14	-1836628	-52499	0.000755042			5.11661e-05
573	01JH-13b 2.5M 25-3	6.15731	0.285519	0.411157	6.571	0.299	2.78973	1.85719	1.50213	15:30	-1170	-4435	-25	9	-1836628	-52499	0.000656871			9.00997e-05
574	01JH-13b 2.5M 25-3 2	6.26627	0.285519	0.411157	6.68	0.3	2.78083	1.85367	1.50018	15:33	-1109	-4413	-25	10	-1836628	-52499	0.00062908			6.23081e-05
575	01JH-13b 2.5M 25-3 3	6.11233	0.285519	0.411157	6.526	0.224	2.78366	1.84804	1.50628	15:37	-1084	-4419	-25	10	-1836628	-52499	0.000632793			6.60216e-05
576	01JH-13b 5M 2-1	5.12274	0.285519	0.411157	5.536	0.285	2.72896	1.82203	1.49776	15:43	2087	-599	-24	16	-1836628	-52499	0.000747866			4.399e-05
577	01JH-13b 5M 2-1 2	5.4436	0.285519	0.411157	5.857	0.299	2.69971	1.82023	1.48317	15:46	2036	-604	-24	17	-1836628	-52499	0.000703876			0.000137105
578	01JH-13b KIM-5				5.522	0.16	2.68784	1.81428	1.48149	15:50	602	6223	-7	11	-1836628	-52499	0.000582297
579	01JH-13b KIM-5				5.6	0.189	2.70216	1.81459	1.48913	15:53	639	6228	-7	11	-1836628	-52499	0.000592725
580	01JH-13b KIM-5				5.351	0.223	2.69648	1.80896	1.49062	15:56	664	6268	-7	11	-1836628	-52499	0.000583453
581	01JH-13b KIM-5	4.25087			5.784	0.192	2.66131	1.79688	1.48108	15:59	685	6352	-5	12	-1836628	-52499	0.000558692
	average and 2SD				5.56425	0.359312											0.000579292
	bracket average and 2SD	5.09		0.411157	5.50325	0.285519											0.000566772	5.92277
582	01JH-13b 5M 4-2 Cs-Res=166	4.47977	0.307309	0.436279	4.918	0.262	2.92004	1.94602	1.50052	16:07	1067	-997	-22	15	-1836628	-52499	0.000815992			0.000243502
583	01JH-13b 5M 4-2 2	4.27186	0.307309	0.436279	4.71	0.202	2.95786	1.98467	1.49036	16:12	1050	-999	-22	15	-1836628	-52499	0.000862598			0.000290108
584	01JH-13b 5M 4-2 3	4.00098	0.307309	0.436279	4.439	0.201	2.96316	1.98569	1.49226	16:16	1062	-988	-22	15	-1836628	-52499	0.000837796			0.000265307
585	01JH-13b 5M 6-2	5.04852	0.307309	0.436279	5.487	0.23	2.9317	1.97724	1.48272	16:20	3267	-1392	-30	19	-1836628	-52499	0.000617048			4.45588e-05
586	01JH-13b 5M 6-2 2, on crack			0.436279	5.823	0.202	2.93654	1.97106	1.48983	16:24	3256	-1408	-30	18	-1836628	-52499	0.00117315			0.000600655	Irregular Analysis: Fracture/Inclusion
587	01JH-13b 5M 10-2	5.05751	0.307309	0.436279	5.496	0.258	2.93105	1.95486	1.49936	16:29	2219	-2347	-26	15	-1836628	-52499	0.000850086			0.000277596
588	01JH-13b 5M 10-2 2, phase overlap			0.436279	5.047	0.243	3.00655	1.9495	1.54221	16:34	2229	-2300	-26	16	-1836628	-52499	0.00184646			0.00127397	Irregular Analysis: Fracture/Inclusion
589	01JH-13b 5M 12-4	6.31397	0.307309	0.436279	6.753	0.243	2.93126	1.95635	1.49833	16:38	3115	-2719	-27	18	-1836628	-52499	0.000617277			4.47873e-05
590	01JH-13b 5M 12-4 2	6.25299	0.307309	0.436279	6.692	0.239	2.91038	1.94328	1.49766	16:42	3145	-2717	-26	18	-1836628	-52499	0.000654869			8.2379e-05
591	01JH-13b 5M 12-4 3	6.35895	0.307309	0.436279	6.798	0.231	2.88943	1.93339	1.49449	16:45	3105	-2675	-26	18	-1836628	-52499	0.000638505			6.60153e-05
592	01JH-13b 5M 14-4	6.13105	0.307309	0.436279	6.57	0.221	2.88937	1.92877	1.49804	16:50	896	-2939	-24	13	-1836628	-52499	0.000745342			0.000172853
593	01JH-13b 5M 14-4 2, not on CL domain	3.93101	0.307309	0.436279	4.369	0.169	2.8858	1.9249	1.49919	16:53	874	-2936	-23	12	-1836628	-52499	0.000834541			0.000262051	Irregular Texture/Zoning: Alteration Suspected
594	01JH-13b 5M 14-4 3, not on CL domain	5.44335	0.307309	0.436279	5.882	0.239	2.89386	1.92705	1.50171	16:57	874	-2954	-23	11	-1836628	-52499	0.000802533			0.000230044	Irregular Texture/Zoning: Alteration Suspected
595	01JH-13b 5M 14-1	6.09206	0.307309	0.436279	6.531	0.226	2.8832	1.91661	1.50433	17:01	-207	-3012	-23	11	-1836628	-52499	0.00093625			0.00036376
596	01JH-13b 5M 14-1 2	6.10006	0.307309	0.436279	6.539	0.244	2.87745	1.91062	1.50603	17:04	-191	-3005	-23	10	-1836628	-52499	0.00085468			0.00028219
597	01JH-13b KIM-5				5.654	0.225	2.84313	1.90628	1.49145	17:08	463	6210	-7	11	-1836628	-52499	0.000581565
598	01JH-13b KIM-5				5.422	0.212	2.8476	1.90155	1.49751	17:11	447	6220	-7	11	-1836628	-52499	0.000556683
599	01JH-13b KIM-5				5.34	0.233	2.83079	1.89482	1.49396	17:14	468	6269	-8	11	-1836628	-52499	0.000562971
600	01JH-13b KIM-5				5.555	0.292	2.83911	1.89373	1.49922	17:18	500	6314	-7	11	-1836628	-52499	0.000561531
	average and 2SD				5.49275	0.278603											0.000565687
	bracket average and 2SD	5.09		0.436279	5.5285	0.307309											0.00057249	4.86795
601	01JH-13b 5M 20-1	6.77001	0.280908	0.43802	7.211	0.198	2.84711	1.89376	1.50341	17:23	3586	-4070	-27	19	-1836628	-52499	0.000760975			0.000213848
602	01JH-13b 5M 20-1 2, on crack			0.43802	6.718	0.271	2.89745	1.89228	1.5312	17:27	3602	-4067	-18	19	-1836628	-52499	0.00166252			0.00111539	Irregular Analysis: Fracture/Inclusion
603	01JH-13b 5M 20-1 3	6.59209	0.280908	0.43802	7.033	0.226	2.85726	1.89122	1.5108	17:30	3595	-4078	-18	17	-1836628	-52499	0.00137228			0.000825153
604	01JH-13b 5M 22-1	6.21626	0.280908	0.43802	6.657	0.274	2.79681	1.8701	1.49554	17:37	-262	-4420	-17	8	-1836628	-52499	0.00129664			0.000749515
605	01JH-13b 5M 22-1 2	5.99335	0.280908	0.43802	6.434	0.265	2.75571	1.86091	1.48084	17:41	-272	-4437	-17	6	-1836628	-52499	0.0006889			0.000141773
606	01JH-13b 5M 22-1 3, on crack			0.43802	6.962	0.262	2.76659	1.85512	1.49133	17:44	-253	-4441	-17	6	-1836628	-52499	0.00164446			0.00109734	Irregular Analysis: Fracture/Inclusion
607	01JH-13b 5M 22-2 near large hole	5.8954	0.280908	0.43802	6.336	0.271	2.5812	1.65516	1.55948	17:48	827	-4399	-24	4	-1836628	-52499	0.000602162			5.50348e-05
608	01JH-13b KIM-5 Cs-Res=167				5.472	0.217	2.925	1.98354	1.47464	17:54	479	6061	-34	14	-1836628	-52499	0.000537072
609	01JH-13b KIM-5				5.419	0.235	3.02821	2.03083	1.49112	17:57	472	6046	-34	13	-1836628	-52499	0.000517966
610	01JH-13b KIM-5				5.629	0.233	3.03471	2.05254	1.47852	18:01	494	6047	-34	13	-1836628	-52499	0.00052696
611	01JH-13b KIM-5				5.751	0.264	3.01509	2.04944	1.47117	18:04	507	6040	-34	13	-1836628	-52499	0.000532273
	average and 2SD				5.56775	0.302494											0.000528568
	bracket average and 2SD	5.09		0.43802	5.53025	0.280908											0.000547128	7.9544
Session #5 Date: 9/10/2016
sample: 01JH-60b
457	01JH-60b KIM-5				3.893	0.22	2.46598	1.88309	1.30954	20:09	-808	6338	-15	8	-2646404	-52516	0.000246724
458	01JH-60b KIM-5				4.138	0.171	2.46356	1.87937	1.31084	20:13	-748	6334	-17	7	-2646404	-52516	0.000254391
459	01JH-60b KIM-5				4.043	0.213	2.46955	1.88246	1.31187	20:16	-720	6335	-17	6	-2646404	-52516	0.00027102
460	01JH-60b KIM-5				4.03	0.211	2.48081	1.88888	1.31338	20:20	-694	6334	-17	6	-2646404	-52516	0.000274147
	average and 2SD				4.026	0.201785											0.000261571	9.4965
461	(01JH-60b 2.5NM 4-7)	6.27128	0.173874	-1.07951	5.185	0.208	2.44709	1.89509	1.29128	20:26	1846	-1690	-10	-5	-2646404	-52516	0.000351697			7.30311e-05	Irregular Texture/Zoning: Alteration Suspected
462	(01JH-60b 2.5NM 4-7)	6.2943	0.173874	-1.07951	5.208	0.202	2.46545	1.89994	1.29764	20:29	1758	-1678	-11	-4	-2646404	-52516	0.000372839			9.41732e-05	Irregular Texture/Zoning: Alteration Suspected
463	(01JH-60b 2.5NM 4-7)	6.25125	0.173874	-1.07951	5.165	0.214	2.46748	1.9028	1.29676	20:33	1803	-1689	-11	-5	-2646404	-52516	0.000373508			9.48421e-05	Irregular Texture/Zoning: Alteration Suspected
464	(01JH-60b 2.5NM 4-3 overlap inclusion)				3.435	0.243	2.40989	1.89603	1.27102	20:37	3186	-1932	-13	-4	-2646404	-52516	0.000347326				Irregular Analysis: Fracture/Inclusion
465	(01JH-60b 2.5NM 4-3)	4.74162	0.173874	-1.07951	3.657	0.221	2.49186	1.90452	1.30839	20:41	3177	-1900	-13	-5	-2646404	-52516	0.000329115			5.04488e-05
466	(01JH-60b 2.5NM 4-3)	4.71259	0.173874	-1.07951	3.628	0.2	2.50676	1.91669	1.30786	20:44	3123	-1860	-15	-3	-2646404	-52516	0.00029174			1.30735e-05	Irregular Texture/Zoning: Alteration Suspected
467	01JH-60b 2.5NM 6-1	5.7407	0.173874	-1.07951	4.655	0.256	2.46642	1.91774	1.2861	20:49	644	-2910	-7	-4	-2646404	-52516	0.000316947			3.8281e-05
468	01JH-60b 2.5NM 6-1	5.85282	0.173874	-1.07951	4.767	0.242	2.46091	1.91958	1.282	20:52	612	-2911	-6	-4	-2646404	-52516	0.000317633			3.89666e-05
469	01JH-60b 2.5NM 6-1	5.88986	0.173874	-1.07951	4.804	0.22	2.46956	1.91567	1.28913	20:56	644	-2889	-7	-4	-2646404	-52516	0.000377402			9.87355e-05
470	01JH-60b 2.5NM 7-1	6.38139	0.173874	-1.07951	5.295	0.194	2.474	1.91786	1.28998	21:00	1050	-3163	-9	-4	-2646404	-52516	0.000357207			7.85404e-05
471	01JH-60b 2.5NM 7-1	6.34435	0.173874	-1.07951	5.258	0.155	2.47559	1.92326	1.28719	21:03	968	-3169	-9	-5	-2646404	-52516	0.000348114			6.94482e-05
472	01JH-60b 2.5NM 7-1	6.24324	0.173874	-1.07951	5.157	0.238	2.47864	1.92678	1.28642	21:07	996	-3160	-9	-5	-2646404	-52516	0.000334465			5.57993e-05
473	01JH-60b KIM-5				4.08	0.188	2.49928	1.92823	1.29615	21:12	-791	6316	-10	5	-2646404	-52516	0.000291641
474	01JH-60b KIM-5				3.922	0.247	2.51712	1.92983	1.30432	21:15	-790	6338	-10	5	-2646404	-52516	0.000289338
475	01JH-60b KIM-5				3.916	0.237	2.51825	1.93222	1.3033	21:19	-790	6357	-10	5	-2646404	-52516	0.000298045
476	01JH-60b KIM-5				4.018	0.206	2.50472	1.93456	1.29472	21:22	-791	6373	-9	6	-2646404	-52516	0.000304022
	average and 2SD				3.984	0.158493											0.000295762
	bracket average and 2SD	5.09		-1.07951	4.005	0.173874											0.000278666	14.831
477	01JH-60b 2.5NM 7-2	6.58481	0.173038	-1.12938	5.448	0.243	2.52364	1.93484	1.30432	21:27	115	-3311	-16	-4	-2646404	-52516	0.000445822			0.00013952
478	01JH-60b 2.5NM 7-2	6.55077	0.173038	-1.12938	5.414	0.22	2.5253	1.94	1.3017	21:31	88	-3279	-16	-4	-2646404	-52516	0.000380355			7.40527e-05
479	01JH-60b 2.5NM 7-2	6.71196	0.173038	-1.12938	5.575	0.2	2.51984	1.94211	1.29748	21:34	71	-3254	-17	-4	-2646404	-52516	0.000497006			0.000190703
480	01JH-60b 2.5NM 7-3	6.14131	0.173038	-1.12938	5.005	0.233	2.55764	1.92979	1.32535	21:38	3679	-3127	-23	-3	-2646404	-52516	0.000402634			9.6331e-05
481	01JH-60b 2.5NM 7-3	6.5688	0.173038	-1.12938	5.432	0.237	2.49852	1.92873	1.29542	21:42	3683	-3099	-9	-3	-2646404	-52516	0.000370924			6.46215e-05
482	01JH-60b 2.5NM 7-3	6.61284	0.173038	-1.12938	5.476	0.248	2.51415	1.93452	1.29962	21:45	3731	-3090	-10	-4	-2646404	-52516	0.000378912			7.26098e-05
483	01JH-60b 2.5NM 8-4	6.94722	0.173038	-1.12938	5.81	0.18	2.50996	1.92983	1.30061	21:49	3278	-3509	-7	-4	-2646404	-52516	0.000624755			0.000318452
484	01JH-60b 2.5NM 8-4	7.03132	0.173038	-1.12938	5.894	0.189	2.50897	1.92666	1.30224	21:52	3256	-3500	-7	-4	-2646404	-52516	0.000515773			0.000209471
485	01JH-60b 2.5NM 8-4 non-osc CL domain	7.22353	0.173038	-1.12938	6.086	0.236	2.49346	1.92068	1.29822	21:56	3367	-3587	-7	-4	-2646404	-52516	0.000394096			8.77932e-05
486	01JH-60b 2.5NM 8-10, mineralized crack runs through			-1.12938	4.388	0.175	2.47625	1.92474	1.28654	22:00	644	-3708	-5	-5	-2646404	-52516	0.000706744
487	01JH-60b 2.5NM 8-10	5.19925	0.173038	-1.12938	4.064	0.202	2.46675	1.92193	1.28348	22:04	671	-3721	-5	-5	-2646404	-52516	0.000436391			0.000130088
488	01JH-60b 2.5NM 8-10	5.64475	0.173038	-1.12938	4.509	0.232	2.44478	1.915	1.27664	22:08	683	-3698	-4	-5	-2646404	-52516	0.000444995			0.000138693
489	01JH-60b 2.5NM 9-3	6.36757	0.173038	-1.12938	5.231	0.187	2.43907	1.90382	1.28115	22:11	2857	-4050	-6	-2	-2646404	-52516	0.000673161			0.000366858
490	01JH-60b 2.5NM 9-3	6.22441	0.173038	-1.12938	5.088	0.175	2.4441	1.89674	1.28858	22:15	2837	-4063	-6	-2	-2646404	-52516	0.000491369			0.000185066
491	01JH-60b 2.5NM 9-3	6.50572	0.173038	-1.12938	5.369	0.344	2.46334	1.894	1.3006	22:18	2847	-4165	-6	-2	-2646404	-52516	0.000485254			0.000178952
492	01JH-60b KIM-5				3.934	0.25	2.48073	1.88997	1.31258	22:22	-761	6362	-8	5	-2646404	-52516	0.000313936
493	01JH-60b KIM-5	6.98927			4.039	0.195	2.47186	1.89036	1.30761	22:26	-734	6362	-8	5	-2646404	-52516	0.000313715
494	01JH-60b KIM-5				3.808	0.235	2.46451	1.88997	1.30399	22:29	-708	6360	-8	5	-2646404	-52516	0.000318413
495	01JH-60b KIM-5				3.922	0.29	2.44755	1.88895	1.29572	22:32	-686	6357	-8	4	-2646404	-52516	0.00032131
	average and 2SD				3.92575	0.188936											0.000316844
	bracket average and 2SD	5.09		-1.12938	3.95487	0.173038											0.000306303	8.03965
496	01JH-60b 2.5NM 9-4	5.30162	0.163553	-1.15748	4.138	0.199	2.45582	1.88359	1.30379	22:37	2990	-4116	-10	-2	-2646404	-52516	0.000421909			9.77969e-05
497	01JH-60b 2.5NM 9-4	5.24756	0.163553	-1.15748	4.084	0.175	2.41527	1.86368	1.29597	22:41	3003	-4159	-9	-2	-2646404	-52516	0.000454722			0.00013061
498	01JH-60b 2.5NM 9-4 off U-Pb CL domain	5.39273	0.163553	-1.15748	4.229	0.33	2.39616	1.8451	1.29866	22:44	2962	-4089	-11	-2	-2646404	-52516	0.000346254			2.21418e-05
499	01JH-60b 2.5M 3-3	6.13659	0.163553	-1.15748	4.972	0.256	2.34003	1.81675	1.28804	22:50	-1788	-1909	-9	-3	-2646404	-52516	0.000409137			8.50246e-05
500	01JH-60b 2.5M 3-3 osc off U-Pb CL	6.18364	0.163553	-1.15748	5.019	0.2	2.338	1.80798	1.29315	22:53	-1838	-1779	-9	-4	-2646404	-52516	0.000374838			5.07256e-05
501	01JH-60b 2.5M 3-3	6.18865	0.163553	-1.15748	5.024	0.173	2.33493	1.81557	1.28606	22:57	-1797	-1887	-9	-3	-2646404	-52516	0.000402216			7.81043e-05
502	01JH-60b 2.5M 7-1	6.38587	0.163553	-1.15748	5.221	0.202	2.32872	1.80677	1.28888	23:02	-2133	-3350	-9	-4	-2646404	-52516	0.000401817			7.77046e-05
503	01JH-60b 2.5M 7-1	5.77417	0.163553	-1.15748	4.61	0.188	2.32798	1.80947	1.28655	23:05	-2076	-3379	-9	-4	-2646404	-52516	0.000368525			4.44125e-05	Irregular Texture/Zoning: Alteration Suspected
504	01JH-60b 2.5M 7-1	5.94136	0.163553	-1.15748	4.777	0.194	2.32909	1.81096	1.28611	23:09	-2120	-3341	-9	-4	-2646404	-52516	0.000411189			8.7077e-05	Irregular Texture/Zoning: Alteration Suspected
505	01JH-60b 5M 3-2, mineralized crack runs through			-1.15748	5.916	0.19	2.33691	1.79703	1.30043	23:16	405	4666	-13	-4	-2646404	-52516	0.000669942
506	01JH-60b 5M 3-2	7.10571	0.163553	-1.15748	5.94	0.254	2.32807	1.79402	1.29769	23:19	415	4641	-13	-5	-2646404	-52516	0.000402772			7.866e-05
507	01JH-60b 5M 3-2	6.9225	0.163553	-1.15748	5.757	0.278	2.33111	1.79316	1.3	23:23	374	4663	-14	-4	-2646404	-52516	0.000555499			0.000231387
508	01JH-60b 5M 5-1	6.37987	0.163553	-1.15748	5.215	0.201	2.33078	1.7941	1.29914	23:27	1494	4133	-14	-5	-2646404	-52516	0.000407455			8.33428e-05
509	01JH-60b 5M 5-1	6.30478	0.163553	-1.15748	5.14	0.228	2.32822	1.79132	1.29972	23:30	1501	4122	-15	-5	-2646404	-52516	0.000416641			9.25288e-05
510	01JH-60b 5M 5-1 darker CL	6.18965	0.163553	-1.15748	5.025	0.18	2.3351	1.78827	1.30579	23:34	1470	4158	-15	-5	-2646404	-52516	0.000474899			0.000150787
511	01JH-60b KIM-5				3.995	0.226	2.33985	1.78553	1.31045	23:38	-666	6292	-15	4	-2646404	-52516	0.000335875
512	01JH-60b KIM-5				3.908	0.243	2.34446	1.78467	1.31367	23:41	-668	6275	-15	4	-2646404	-52516	0.000325214
513	01JH-60b KIM-5				3.987	0.28	2.33366	1.78166	1.30983	23:45	-674	6255	-14	5	-2646404	-52516	0.000325425
514	01JH-60b KIM-5				3.82	0.283	2.34217	1.77959	1.31613	23:48	-651	6258	-15	5	-2646404	-52516	0.000339009
	average and 2SD				3.9275	0.163434											0.000331381
	bracket average and 2SD	5.09		-1.15748	3.92663	0.163553											0.000324112	5.78482
515	01JH-60b 5M 10-3	7.49439	0.33742	-1.20238	6.283	0.231	2.32029	1.77622	1.30631	23:52	2523	2514	-18	-6	-2646404	-52516	0.000489029			0.000156312	Irregular Texture/Zoning: Alteration Suspected
516	01JH-60b 5M 10-3, mineralized crack runs through			-1.20238	6.531	0.212	2.33821	1.77896	1.31437	23:55	2501	2494	-17	-6	-2646404	-52516	0.0011404
517	01JH-60b 5M 10-3	7.70865	0.33742	-1.20238	6.497	0.229	2.32635	1.77931	1.30744	23:59	2495	2477	-18	-6	-2646404	-52516	0.00048327			0.000150552
518	01JH-60b 5M 10-4	5.20364	0.33742	-1.20238	3.995	0.195	2.30462	1.77556	1.29797	00:03	1515	2486	-14	-5	-2646404	-52516	0.000452151			0.000119434	Irregular Texture/Zoning: Alteration Suspected
519	01JH-60b 5M 10-4 osc CL not U-Pb	5.43491	0.33742	-1.20238	4.226	0.278	2.30933	1.77372	1.30197	00:06	1454	2591	-15	-6	-2646404	-52516	0.00054879			0.000216072
520	01JH-60b 5M 10-4	5.20364	0.33742	-1.20238	3.995	0.247	2.31298	1.77583	1.30248	00:10	1500	2510	-14	-5	-2646404	-52516	0.000530644			0.000197927	Irregular Texture/Zoning: Alteration Suspected
521	01JH-60b 5M 12-2	5.90148	0.33742	-1.20238	4.692	0.263	2.29865	1.7718	1.29735	00:14	1725	1701	-14	-4	-2646404	-52516	0.000451933			0.000119215
522	01JH-60b 5M 12-2	6.24189	0.33742	-1.20238	5.032	0.211	2.2943	1.76856	1.29728	00:17	1726	1734	-14	-4	-2646404	-52516	0.000579261			0.000246543
523	01JH-60b 5M 12-2 osc off U-Pb	5.36383	0.33742	-1.20238	4.155	0.197	2.29269	1.76507	1.29892	00:20	1802	1675	-15	-4	-2646404	-52516	0.000501487			0.00016877
524	01JH-60b 10M 1-2	5.8414	0.33742	-1.20238	4.632	0.252	2.2354	1.76288	1.26804	00:25	-2241	5164	-8	-2	-2646404	-52516	0.000404578			7.18606e-05	Irregular Texture/Zoning: Alteration Suspected
525	01JH-60b 10M 1-2	6.02162	0.33742	-1.20238	4.812	0.245	2.23953	1.76022	1.2723	00:28	-2242	5203	-7	-3	-2646404	-52516	0.00039656			6.38432e-05	Irregular Texture/Zoning: Alteration Suspected
526	01JH-60b 10M 1-2	5.86944	0.33742	-1.20238	4.66	0.263	2.24629	1.75799	1.27776	00:32	-2264	5188	-8	-3	-2646404	-52516	0.000562666			0.000229948	Irregular Texture/Zoning: Alteration Suspected
527	01JH-60b 10M 5-1, Cs-Res=172	6.53924	0.33742	-1.20238	5.329	0.235	2.36691	1.83345	1.29096	00:38	-2243	3707	-6	-6	-2646404	-52516	0.000643873			0.000311156	Proximal to <85% Concordant U-Pb Analysis
528	01JH-60b 10M 5-1 mineralized crack			-1.20238	4.938	0.192	2.39741	1.85876	1.28979	00:41	-2225	3705	-6	-6	-2646404	-52516	0.00153104				Proximal to <85% Concordant U-Pb Analysis
529	01JH-60b 10M 5-1, mineralized crack runs through			-1.20238	5.403	0.227	2.42944	1.86556	1.30226	00:45	-2265	3713	-7	-6	-2646404	-52516	0.00397138				Proximal to <85% Concordant U-Pb Analysis
530	01JH-60b 10M 9-1	4.03223	0.33742	-1.20238	2.825	0.203	2.37513	1.85848	1.27799	00:49	-2349	2086	-4	-6	-2646404	-52516	0.00042546			9.27427e-05
531	01JH-60b 10M 9-1	4.12834	0.33742	-1.20238	2.921	0.238	2.3742	1.85473	1.28008	00:52	-2395	2104	-4	-6	-2646404	-52516	0.000395453			6.27363e-05
532	01JH-60b 10M 9-1 osc off U-Pb	4.31957	0.33742	-1.20238	3.112	0.156	2.37186	1.85387	1.27941	00:56	-2369	1982	-4	-6	-2646404	-52516	0.000383289			5.05714e-05
533	01JH-60b KIM-5				3.642	0.173	2.42747	1.84714	1.31418	01:00	-656	6203	-14	3	-2646404	-52516	0.000333806
534	01JH-60b KIM-5				3.69	0.184	2.41443	1.84413	1.30925	01:03	-657	6173	-14	4	-2646404	-52516	0.000339014
535	01JH-60b KIM-5				3.853	0.244	2.42601	1.84456	1.31523	01:06	-639	6183	-14	4	-2646404	-52516	0.00032809
536	01JH-60b KIM-5				4.157	0.184	2.42299	1.8435	1.31434	01:10	-633	6233	-13	4	-2646404	-52516	0.000335306
	average and 2SD				3.8355	0.465161											0.000334054
	bracket average and 2SD	5.09		-1.20238	3.8815	0.33742											0.000332717	3.43042
sample: W74/3
595	W74/3 KIM-5				3.835	0.193	2.4546	1.88406	1.30282	03:53	-4143	869	1	11	-2646404	-52516	0.000334746
596	W74/3 KIM-5				3.873	0.217	2.46216	1.89009	1.30267	03:56	-4141	892	1	12	-2646404	-52516	0.000334629
597	W74/3 KIM-5				4.022	0.219	2.46854	1.88903	1.30677	04:00	-4154	911	1	12	-2646404	-52516	0.00033346
598	W74/3 KIM-5				3.768	0.269	2.46904	1.89517	1.3028	04:03	-4171	938	1	12	-2646404	-52516	0.000333639
	average and 2SD				3.8745	0.214976
599	W74/3 152	6.31828	0.239673	-1.24641	5.064	0.263	2.4751	1.91078	1.29533	04:07	-126	21	-12	4	-2646404	-52516	0.000446428			0.000118452
600	W74/3 152	6.11303	0.239673	-1.24641	4.859	0.26	2.43594	1.92224	1.26724	04:10	-90	44	-12	3	-2646404	-52516	0.000441283			0.000113308
601	W74/3 154	6.46146	0.239673	-1.24641	5.207	0.17	2.50564	1.91121	1.31102	04:15	327	776	-13	9	-2646404	-52516	0.000375785			4.78095e-05
602	W74/3 154	6.21515	0.239673	-1.24641	4.961	0.227	2.50949	1.90804	1.31522	04:18	360	779	-13	8	-2646404	-52516	0.000386933			5.89581e-05
603	W74/3 154	6.45345	0.239673	-1.24641	5.199	0.276	2.49742	1.91246	1.30587	04:22	330	735	-14	9	-2646404	-52516	0.000385851			5.78755e-05
604	W74/3 170	6.19613	0.239673	-1.24641	4.942	0.175	2.5016	1.89189	1.32228	04:26	115	-790	-14	2	-2646404	-52516	0.000442338			0.000114362
605	W74/3 170	6.1731	0.239673	-1.24641	4.919	0.24	2.5344	1.92345	1.31763	04:29	141	-783	-13	2	-2646404	-52516	0.0004583			0.000130325
606	W74/3 170	6.21315	0.239673	-1.24641	4.959	0.195	2.5522	1.93836	1.31668	04:32	157	-786	-14	2	-2646404	-52516	0.00043707			0.000109095
607	W74/3 174	6.44644	0.239673	-1.24641	5.192	0.198	2.57506	1.94978	1.32069	04:36	1250	-1922	-19	-7	-2646404	-52516	0.000399031			7.10563e-05
608	W74/3 174	6.15408	0.239673	-1.24641	4.9	0.307	2.57193	1.97454	1.30255	04:41	1280	-1921	-3	-8	-2646404	-52516	0.000431904			0.000103929
609	W74/3 174	6.093	0.239673	-1.24641	4.839	0.18	2.5944	1.99191	1.30247	04:44	1261	-1936	-3	-8	-2646404	-52516	0.000435968			0.000107993
610	W74/3 KIM-5				3.613	0.251	2.528	1.99586	1.26662	04:48	-4150	760	17	10	-2646404	-52516	0.000323038
611	W74/3 KIM-5				3.893	0.205	2.67158	2.00794	1.3305	04:52	-4148	841	-16	12	-2646404	-52516	0.000317587
612	W74/3 KIM-5				3.905	0.174	2.66743	2.01459	1.32405	04:55	-4011	854	-17	13	-2646404	-52516	0.000321789
613	W74/3 KIM-5				3.789	0.214	2.65655	2.01056	1.32129	04:59	-4010	895	-17	13	-2646404	-52516	0.000324913
	average and 2SD				3.8	0.27022
	bracket average and 2SD	5.09		-1.24641	3.83725	0.239673											0.000327975	4.20089
sample: 01JH-54b
614	01JH-54b KIM-5				3.36	0.148	2.59914	2.08668	1.24558	05:08	1071	6520	-73	45	-2646404	-52516	0.000278374
615	01JH-54b KIM-5				3.433	0.189	2.58083	2.00051	1.29009	05:11	1104	6525	-75	45	-2646404	-52516	0.000292793
616	01JH-54b KIM-5				3.468	0.208	2.54508	1.99535	1.27551	05:14	1135	6528	-72	46	-2646404	-52516	0.000301099
617	01JH-54b KIM-5				3.411	0.205	2.49651	1.99425	1.25185	05:18	1152	6529	-60	46	-2646404	-52516	0.000300816
	average and 2SD				3.418	0.0904655											0.000293271	7.26404
618	01JH-54b 2.5NM-1 1-2	6.8719	0.310339	-1.55919	5.302	0.168	2.62773	1.98936	1.32089	05:25	1209	290	-35	15	-2646404	-52516	0.000375291			5.98799e-05
619	01JH-54b 2.5NM-1 1-2	7.15735	0.310339	-1.55919	5.587	0.381	2.61452	1.98537	1.31689	05:28	1202	267	-34	13	-2646404	-52516	0.000386432			7.10217e-05
620	01JH-54b 2.5NM-1 1-2	7.21844	0.310339	-1.55919	5.648	0.232	2.63802	1.98307	1.33027	05:32	1167	284	-35	12	-2646404	-52516	0.000392432			7.7021e-05
621	01JH-54b 2.5NM-1 4-1	6.33206	0.310339	-1.55919	4.763	0.188	2.63666	1.98412	1.32888	05:36	1904	-1758	-32	23	-2646404	-52516	0.000502741			0.000187331
622	01JH-54b 2.5NM-1 4-1	7.00912	0.310339	-1.55919	5.439	0.178	2.63312	1.98295	1.32788	05:40	1936	-1818	-31	25	-2646404	-52516	0.0003549			3.94893e-05
623	01JH-54b 2.5NM-1 4-1	6.86189	0.310339	-1.55919	5.292	0.17	2.60707	1.97067	1.32294	05:43	1963	-1771	-31	26	-2646404	-52516	0.000431405			0.000115994
624	01JH-54b 2.5NM-2 7-1	6.1638	0.310339	-1.55919	4.595	0.221	2.39277	1.97297	1.21277	05:50	3331	4912	-72	40	-2646404	-52516	0.000376949			6.1538e-05
625	01JH-54b 2.5NM-2 7-1	6.25895	0.310339	-1.55919	4.69	0.199	2.43358	1.9675	1.23689	05:53	3263	4918	-71	40	-2646404	-52516	0.000335261			1.985e-05
626	01JH-54b 2.5NM-2 7-1	6.41319	0.310339	-1.55919	4.844	0.204	2.4481	1.9702	1.24257	05:56	3256	4935	-71	41	-2646404	-52516	0.000385454			7.00428e-05
627	01JH-54b 2.5M 1-2	6.96204	0.310339	-1.55919	5.392	0.193	2.59655	1.95193	1.33025	06:02	-2540	249	3	-16	-2646404	-52516	0.000538826			0.000223415
628	01JH-54b 2.5M 1-2	7.23647	0.310339	-1.55919	5.666	0.185	2.60438	1.95995	1.3288	06:05	-2503	265	2	-15	-2646404	-52516	0.000390246			7.48351e-05
629	01JH-54b 2.5M 1-2	7.20642	0.310339	-1.55919	5.636	0.154	2.62692	1.97297	1.33145	06:08	-2472	276	2	-15	-2646404	-52516	0.000404586			8.91748e-05
630	01JH-54b 2.5M 5-1	7.35466	0.310339	-1.55919	5.784	0.196	2.55092	1.97305	1.29288	06:14	-3769	-1760	41	-31	-2646404	-52516	0.000340564			2.51531e-05
631	01JH-54b 2.5M 5-1	7.65112	0.310339	-1.55919	6.08	0.156	2.56483	1.98651	1.29113	06:17	-3788	-1750	42	-32	-2646404	-52516	0.000345606			3.01955e-05
632	01JH-54b 2.5M 5-1	7.578	0.310339	-1.55919	6.007	0.192	2.57364	1.98944	1.29365	06:20	-3761	-1738	41	-31	-2646404	-52516	0.000368159			5.27486e-05
633	01JH-54b KIM-5				3.547	0.249	2.63177	1.99116	1.32172	06:24	949	6526	-70	42	-2646404	-52516	0.000307669
634	01JH-54b KIM-5				3.861	0.153	2.62879	1.9797	1.32787	06:27	910	6529	-69	41	-2646404	-52516	0.000321015
635	01JH-54b KIM-5				3.582	0.146	2.60174	1.96398	1.32473	06:30	947	6498	-70	41	-2646404	-52516	0.000383167
636	01JH-54b KIM-5				3.521	0.25	2.59431	1.94892	1.33116	06:34	957	6464	-70	39	-2646404	-52516	0.000338353
	average and 2SD				3.62775	0.314992											0.000337551
	bracket average and 2SD	5.09		-1.55919	3.52287	0.310339											0.000315411	20.769
637	01JH-54b 2.5M 8-1	7.3788	0.429774	-1.60695	5.76	0.164	2.59794	1.96836	1.31985	06:40	-1828	-3049	16	-17	-2646404	-52516	0.000380364			3.77344e-05
638	01JH-54b 2.5M 8-1	7.3768	0.429774	-1.60695	5.758	0.227	2.67749	2.00591	1.3348	06:44	-1787	-3036	15	-17	-2646404	-52516	0.000376226			3.35967e-05
639	01JH-54b 2.5M 8-1	7.41085	0.429774	-1.60695	5.792	0.224	2.62663	2.0065	1.30906	06:47	-1852	-3057	17	-16	-2646404	-52516	0.000391613			4.89838e-05
640	01JH-54b 2.5M 9-2	7.3147	0.429774	-1.60695	5.696	0.252	2.46069	1.95525	1.2585	06:51	-3893	-3537	60	-33	-2646404	-52516	0.000434582			9.19522e-05
641	01JH-54b 2.5M 9-2	7.35877	0.429774	-1.60695	5.74	0.225	2.45149	1.93249	1.26856	06:54	-3870	-3517	59	-33	-2646404	-52516	0.000443619			0.00010099
642	01JH-54b 2.5M 9-2	7.33073	0.429774	-1.60695	5.712	0.243	2.4553	1.92619	1.27469	06:58	-3843	-3542	59	-33	-2646404	-52516	0.000441028			9.83983e-05
643	01JH-54b 5M 4-1	6.95813	0.429774	-1.60695	5.34	0.226	2.53771	1.92353	1.3193	07:02	-4190	4245	8	-6	-2646404	-52516	0.000416949			7.43198e-05	Proximal to <85% Concordant U-Pb Analysis
644	01JH-54b 5M 4-1	8.01182	0.429774	-1.60695	6.392	0.26	2.5241	1.91387	1.31885	07:05	-4242	4245	8	-6	-2646404	-52516	0.000446131			0.000103502
645	01JH-54b 5M 4-2	6.7538	0.429774	-1.60695	5.136	0.198	2.50733	1.9001	1.31958	07:09	-4496	4284	13	-8	-2646404	-52516	0.000514758			0.000172129
646	01JH-54b 5M 4-2	6.91606	0.429774	-1.60695	5.298	0.18	2.48635	1.89376	1.31291	07:12	-4518	4317	13	-7	-2646404	-52516	0.000426896			8.4267e-05
647	01JH-54b KIM-5				3.5	0.198	2.41476	1.88888	1.27841	07:16	1141	6612	-71	47	-2646404	-52516	0.000327481
648	01JH-54b KIM-5				3.206	0.255	2.39651	1.88152	1.27371	07:19	1150	6658	-71	48	-2646404	-52516	0.000341325
649	01JH-54b KIM-5				3.377	0.281	2.37489	1.87421	1.26714	07:22	1180	6670	-70	49	-2646404	-52516	0.000352887
650	01JH-54b KIM-5				3.205	0.219	2.33412	1.86212	1.25347	07:25	1204	6673	-69	48	-2646404	-52516	0.000369139
	average and 2SD				3.322	0.287179											0.000347708
	bracket average and 2SD	5.09		-1.60695	3.47487	0.429774											0.000342629	14.6184
Session #6 Date: 9/12/2016
sample: 01JH-60a
13	01JH-60a KIM-5				5.303	0.15	2.90284	1.93355	1.50131	17:45	-2656	2082	-16	-7	-2650892	-52622	0.000172666
14	01JH-60a KIM-5				5.45	0.185	2.9098	1.94321	1.49742	17:49	-2626	2084	-17	-8	-2650892	-52622	0.000187019
15	01JH-60a KIM-5				5.199	0.219	2.90843	1.94567	1.49482	17:52	-2602	2087	-17	-9	-2650892	-52622	0.000192411
16	01JH-60a KIM-5				5.413	0.21	2.90973	1.94551	1.49561	17:55	-2581	2089	-17	-9	-2650892	-52622	0.000196323
					5.34125	0.227076											0.000187105	11.0673
17	01JH-60a 39	5.92729	0.355708	0.1031	6.031	0.178	2.88988	1.92928	1.49791	18:01	-1651	-177	-16	-14	-2650892	-52622	0.00093114			0.00073043
18	01JH-60a 39	6.20926	0.355708	0.1031	6.313	0.221	2.86833	1.92713	1.48839	18:05	-1634	-186	-16	-14	-2650892	-52622	0.000549074			0.000348364
19	01JH-60a 39 non-osc CL rim	6.38924	0.355708	0.1031	6.493	0.182	2.86741	1.93069	1.48518	18:08	-1767	-220	-16	-13	-2650892	-52622	0.000258149			5.74393e-05
20	01JH-60a 47 other osc domain	7.00618	0.355708	0.1031	7.11	0.221	2.89619	1.92631	1.50349	18:16	-1042	471	-18	-12	-2650892	-52622	0.00227523			0.00207452	Proximal to <85% Concordant U-Pb Analysis
21	01JH-60a 47	6.40524	0.355708	0.1031	6.509	0.24	2.87434	1.92709	1.49155	18:20	-1052	415	-19	-12	-2650892	-52622	0.000596207			0.000395497	Proximal to <85% Concordant U-Pb Analysis
22	01JH-60a 47	6.32925	0.355708	0.1031	6.433	0.16	2.86544	1.93073	1.48412	18:24	-1084	490	-19	-12	-2650892	-52622	0.000265614			6.49043e-05	Proximal to <85% Concordant U-Pb Analysis
23	01JH-60a 51	6.62322	0.355708	0.1031	6.727	0.137	2.86085	1.92377	1.48711	18:28	-1439	726	-18	-12	-2650892	-52622	0.000267186			6.64761e-05
24	01JH-60a 51	6.58122	0.355708	0.1031	6.685	0.247	2.8293	1.91684	1.47602	18:31	-1399	721	-18	-13	-2650892	-52622	0.00023582			3.51098e-05
25	01JH-60a 51	6.50223	0.355708	0.1031	6.606	0.176	2.82585	1.9109	1.47881	18:35	-1434	768	-18	-12	-2650892	-52622	0.000230347			2.96371e-05
26	01JH-60a 64	6.61522	0.355708	0.1031	6.719	0.193	2.81932	1.89998	1.48386	18:39	-1926	-90	-15	-13	-2650892	-52622	0.000249977			4.92666e-05
27	01JH-60a 64	6.57222	0.355708	0.1031	6.676	0.224	2.81599	1.89869	1.48312	18:43	-1976	-119	-16	-14	-2650892	-52622	0.000206943			6.23283e-06
28	01JH-60a 64	6.68421	0.355708	0.1031	6.788	0.193	2.80066	1.89267	1.47974	18:46	-1965	-85	-16	-14	-2650892	-52622	0.000217131			1.64205e-05
29	01JH-60a 68	6.31425	0.355708	0.1031	6.418	0.225	2.78914	1.88676	1.47827	18:50	-2411	-7	-14	-14	-2650892	-52622	0.000231514			3.0804e-05
30	01JH-60a 68	6.25226	0.355708	0.1031	6.356	0.22	2.80165	1.89032	1.4821	18:53	-2423	6	-14	-15	-2650892	-52622	0.00045506			0.00025435
31	01JH-60a 68	6.56422	0.355708	0.1031	6.668	0.202	2.82188	1.89983	1.48533	18:56	-2468	-19	-14	-15	-2650892	-52622	0.000635403			0.000434693
32	01JH-60a KIM-5				5.021	0.182	2.83965	1.89897	1.49537	19:00	-2661	2102	-17	-9	-2650892	-52622	0.000213117
33	01JH-60a KIM-5				5.045	0.186	2.83915	1.90112	1.49341	19:03	-2634	2107	-17	-9	-2650892	-52622	0.000215794
34	01JH-60a KIM-5				5.12	0.269	2.85719	1.91019	1.49576	19:07	-2607	2110	-17	-8	-2650892	-52622	0.000215758
35	01JH-60a KIM-5				4.998	0.179	2.86942	1.92091	1.49378	19:10	-2585	2112	-17	-9	-2650892	-52622	0.000212591
	average and 2SD				5.046	0.105868											0.000214315
	bracket average and 2SD	5.09		0.1031	5.19362	0.355708											0.00020071	16.0281
sample: W74/3
36	W74/3 KIM-5				13.328	1.939	2.17526	2.11938	1.02637	19:27	-3346	-458	0	-24	-2650892	-52622	0.000217561
37	W74/3 KIM-5				5.229	0.203	2.97369	1.97689	1.50423	19:31	-3344	-483	-9	-15	-2650892	-52622	0.000262956
39	W74/3 KIM-5				5.155	0.178	2.9898	1.99245	1.50056	19:34	-3345	-505	-11	-18	-2650892	-52622	0.000261572
30	W74/3 KIM-5				5.226	0.172	3.00042	2.00262	1.49825	19:37	-3342	-525	-11	-19	-2650892	-52622	0.000261509
40	W74/3 KIM-5				5.255	0.185	3.01048	2.01115	1.49689	19:41	-3339	-546	-11	-19	-2650892	-52622	0.000261201
	average and 2SD				5.21625	0.0857185											0.000261809	0.596766
41	W74/3 7	6.66389	0.208712	0.147126	6.812	0.252	2.98141	2.01964	1.47621	19:45	2185	389	-12	-14	-2650892	-52622	0.00062845			0.000366919
42	W74/3 13	6.10398	0.208712	0.147126	6.252	0.183	3.02302	2.01835	1.49777	19:49	2320	1032	-16	-15	-2650892	-52622	0.000453742			0.000192211
43	W74/3 15	6.6089	0.208712	0.147126	6.757	0.137	3.04201	2.02758	1.50031	19:53	2801	1444	-17	-11	-2650892	-52622	0.000353448			9.19167e-05
44	W74/3 17	6.43093	0.208712	0.147126	6.579	0.144	3.04048	2.02637	1.50046	19:57	2820	1760	-17	-10	-2650892	-52622	0.000345317			8.37858e-05	Proximal to <85% Concordant U-Pb Analysis
45	W74/3 30	6.04198	0.208712	0.147126	6.19	0.164	3.03381	2.02167	1.50064	20:01	295	2229	-9	-7	-2650892	-52622	0.000431694			0.000170163
46	W74/3 32	6.36494	0.208712	0.147126	6.513	0.22	3.02582	2.01358	1.50271	20:04	-606	1953	-5	-9	-2650892	-52622	0.000955597			0.000694066	Proximal to <85% Concordant U-Pb Analysis
47	W74/3 41	6.6209	0.208712	0.147126	6.769	0.164	2.99757	2.01479	1.48778	20:09	1014	1645	-12	-13	-2650892	-52622	0.000323583			6.20513e-05
48	W74/3 58	6.50792	0.208712	0.147126	6.656	0.168	3.00225	2.00321	1.49872	20:12	1606	-710	-11	-19	-2650892	-52622	0.000365657			0.000104126
49	W74/3 62	7.62375	0.208712	0.147126	7.772	0.163	2.98075	1.99836	1.4916	20:16	1943	-646	-12	-20	-2650892	-52622	0.000382181			0.00012065
50	W74/3 74	6.02699	0.208712	0.147126	6.175	0.228	3.03113	1.99347	1.52053	20:21	2733	797	-16	-12	-2650892	-52622	0.0012415			0.000979968	Proximal to <85% Concordant U-Pb Analysis
51	W74/3 114	5.915	0.208712	0.147126	6.063	0.161	2.9735	1.98729	1.49626	20:25	2399	-1867	-12	-25	-2650892	-52622	0.00044587			0.000184339
52	W74/3 131	5.2711	0.208712	0.147126	5.419	0.191	2.95232	1.97247	1.49677	20:29	-25	-1066	-5	-22	-2650892	-52622	0.000550214			0.000288683	Irregular Texture/Zoning: Alteration Suspected
53	W74/3 133	6.47092	0.208712	0.147126	6.619	0.209	2.93344	1.9709	1.48837	20:32	-327	-1960	-3	-24	-2650892	-52622	0.000338341			7.68093e-05
54	W74/3 134	7.05984	0.208712	0.147126	7.208	0.167	2.91067	1.96026	1.48484	20:36	-82	-1726	-4	-24	-2650892	-52622	0.000413464			0.000151933
55	W74/3 143	6.53191	0.208712	0.147126	6.68	0.201	2.88213	1.94262	1.48363	20:40	-852	701	-4	-17	-2650892	-52622	0.000595036			0.000333505
56	W74/3 KIM-5				5.272	0.158	2.88866	1.93233	1.49491	20:44	-3372	-463	1	-18	-2650892	-52622	0.000258533
57	W74/3 KIM-5				5.05	0.148	2.86964	1.93034	1.4866	20:47	-3370	-488	1	-19	-2650892	-52622	0.000261888
58	W74/3 KIM-5				5.4	0.225	2.84469	1.92294	1.47934	20:50	-3364	-510	1	-20	-2650892	-52622	0.000262224
59	W74/3 KIM-5				5.316	0.191	2.84351	1.91543	1.48452	20:53	-3360	-534	1	-21	-2650892	-52622	0.000262367
	average and 2SD				5.2595	0.29884											0.000261253
	bracket average and 2SD	5.09		0.147126	5.23788	0.208712											0.000261531	1.01926
sample: W74/4
60	W74/4 KIM-5				5.165	0.202	2.78103	1.86435	1.49169	21:11	895	3704	-13	-36	-2650892	-52622	0.000232244
61	W74/4 KIM-5				5.352	0.21	2.79193	1.86826	1.4944	21:14	779	3626	-13	-37	-2650892	-52622	0.000225093
62	W74/4 KIM-5				5.298	0.259	2.77704	1.86881	1.48599	21:17	836	3595	-12	-37	-2650892	-52622	0.000230466
63	W74/4 KIM-5				5.303	0.246	2.7763	1.8694	1.48513	21:21	852	3633	-12	-38	-2650892	-52622	0.000242207
	average and 2SD				5.2795	0.160254											0.000232502	6.14889
64	W74/4 1	6.42539	0.112696	0.178467	6.605	0.225	2.81903	1.85426	1.5203	21:30	-3619	-62	2	-30	-2650892	-52622	0.000278813			2.967e-05
65	W74/4 1	7.35922	0.112696	0.178467	7.539	0.22	2.77864	1.85805	1.49546	21:34	-3663	-38	8	-28	-2650892	-52622	0.000327007			7.78638e-05
66	W74/4 1	7.15526	0.112696	0.178467	7.335	0.241	2.76104	1.85555	1.48799	21:37	-3633	-79	3	-33	-2650892	-52622	0.000330875			8.1732e-05
67	W74/4 2	6.49637	0.112696	0.178467	6.676	0.175	2.76148	1.84917	1.49336	21:41	-3183	636	1	-32	-2650892	-52622	0.000305382			5.62387e-05
68	W74/4 2 Cs-Res=175	6.53837	0.112696	0.178467	6.718	0.175	2.89357	1.92541	1.50284	21:47	-3153	624	1	-31	-2650892	-52622	0.000307025			5.78817e-05
69	W74/4 3	6.22742	0.112696	0.178467	6.407	0.193	2.92991	1.95525	1.49848	21:52	-3981	835	5	-32	-2650892	-52622	0.000314637			6.54935e-05
70	W74/4 3	6.04146	0.112696	0.178467	6.221	0.157	2.91819	1.96335	1.48633	21:55	-3948	842	4	-33	-2650892	-52622	0.000346225			9.70817e-05
71	W74/4 4	5.90648	0.112696	0.178467	6.086	0.142	2.92806	1.95439	1.49819	22:01	-5242	-186	2	-30	-2650892	-52622	0.000430506			0.000181363
72	W74/4 4	6.3244	0.112696	0.178467	6.504	0.172	2.90715	1.9486	1.49192	22:04	-5264	-181	2	-31	-2650892	-52622	0.000339913			9.07698e-05
73	W74/4 5	6.85131	0.112696	0.178467	7.031	0.157	2.92107	1.93785	1.50738	22:09	-4064	-1053	-2	-28	-2650892	-52622	0.000452651			0.000203508
74	W74/4 5	7.11726	0.112696	0.178467	7.297	0.241	2.88522	1.92983	1.49507	22:12	-4040	-1039	-2	-28	-2650892	-52622	0.000389881			0.000140738
75	W74/4 6	6.82731	0.112696	0.178467	7.007	0.198	2.91796	1.90135	1.53468	22:20	4403	1068	-40	-18	-2650892	-52622	0.000337791			8.86478e-05
76	W74/4 6	6.3384	0.112696	0.178467	6.518	0.205	2.84285	1.89854	1.49739	22:24	4404	1045	0	-21	-2650892	-52622	0.000342585			9.34416e-05
77	W74/4 7	5.7715	0.112696	0.178467	5.951	0.186	2.84109	1.9001	1.49523	22:28	3439	1071	4	-23	-2650892	-52622	0.000334708			8.5565e-05
78	W74/4 8	6.41139	0.112696	0.178467	6.591	0.164	2.82543	1.89494	1.49104	22:33	1705	1009	7	-28	-2650892	-52622	0.000408617			0.000159474
79	W74/4 KIM-5				5.26	0.175	2.79129	1.88367	1.48184	22:36	984	3761	-6	-40	-2650892	-52622	0.000254741
80	W74/4 KIM-5	6.13444			5.231	0.21	2.76467	1.8667	1.48105	22:40	1005	3690	-5	-39	-2650892	-52622	0.000253203
81	W74/4 KIM-5				5.251	0.23	2.75445	1.86044	1.48054	22:43	937	3632	-5	-38	-2650892	-52622	0.000270811
82	W74/4 KIM-5				5.295	0.182	2.75093	1.85778	1.48077	22:46	924	3670	-5	-38	-2650892	-52622	0.000284382
	average and 2SD				5.25925	0.0534759											0.000265784
	bracket average and 2SD	5.09		0.178467	5.26938	0.112696											0.000249143	16.6739
sample: 01JH-36
83	01JH-36 KIM-5				4.925	0.185	2.77082	1.86591	1.48497	22:54	6080	1260	-14	9	-2650892	-52622	0.00194686
84	01JH-36 KIM-5				4.902	0.222	2.76832	1.871	1.47959	22:57	6040	1252	-15	7	-2650892	-52622	0.00197322
85	01JH-36 KIM-5				4.907	0.232	2.76344	1.87581	1.4732	23:01	5992	1257	-14	8	-2650892	-52622	0.00198836
87	01JH-36 KIM-5				4.848	0.226	2.77585	1.87714	1.47877	23:04	5823	1224	-14	8	-2650892	-52622	0.00202869
	average and 2SD				4.8955	0.0663425											0.00198428	3.44815
87	01JH-36 5	5.97565	0.219206	-0.172621	5.802	0.185	2.77004	1.88172	1.47208	23:08	2711	-892	-8	9	-2650892	-52622	0.00231318			0.000272494
88	01JH-36 5	5.89664	0.219206	-0.172621	5.723	0.213	2.78111	1.88821	1.47288	23:12	2666	-890	-9	8	-2650892	-52622	0.00229833			0.000257637
89	01JH-36 5	5.85263	0.219206	-0.172621	5.679	0.182	2.76896	1.88817	1.46648	23:15	2690	-926	-9	8	-2650892	-52622	0.00258829			0.000547597
90	01JH-36 69 U-Pb domain	4.67143	0.219206	-0.172621	4.498	0.227	2.76466	1.87788	1.47222	23:19	3864	277	-8	12	-2650892	-52622	0.00241364			0.000372952
91	01JH-36 69 dark CL domain	3.23218	0.219206	-0.172621	3.059	0.231	2.77445	1.87863	1.47685	23:23	3773	482	-8	8	-2650892	-52622	0.0024541			0.000413411	Irregular Texture/Zoning: Alteration Suspected
92	01JH-36 KIM-5				4.812	0.268	2.76006	1.86904	1.47672	23:26	6103	1277	-14	7	-2650892	-52622	0.00208278
93	01JH-36 KIM-5				4.883	0.194	2.75318	1.86752	1.47425	23:29	6150	1336	-14	6	-2650892	-52622	0.00210336
94	01JH-36 KIM-5				4.882	0.232	2.7733	1.87084	1.48238	23:33	6137	1419	-14	6	-2650892	-52622	0.00210245
95	01JH-36 KIM-5				5.173	0.187	2.75966	1.86795	1.47737	23:36	6158	1434	-14	7	-2650892	-52622	0.00209979
	average and 2SD				4.9375	0.320959											0.0020971
	bracket average and 2SD	5.09		-0.172621	4.9165	0.219206											0.00204069	6.33478
Session #7 Date: 1/23/2017
Note: This session was conducted after 2 samples were placed under high vacuum for ~1 month
sample: 01JH-36
20	01JH-36 KIM-5				3.08	0.157	2.39164	1.54278	1.55022	19:00	6165	414	20	-9	-2663124	-190544	0.00015658
21	01JH-36 KIM-5				3.167	0.155	2.36264	1.52706	1.54718	19:04	6200	400	19	-11	-2663124	-190544	0.000151152
22	01JH-36 KIM-5				3.189	0.149	2.33174	1.5093	1.54492	19:07	6226	418	18	-12	-2663124	-190544	0.000155541
23	01JH-36 KIM-5				3.109	0.174	2.30792	1.49545	1.54329	19:10	6203	474	18	-12	-2663124	-190544	0.000170463
	average and 2SD				3.13625	0.100894											0.000158434	10.5497
24	01JH-36 69	4.37866	0.191111	-1.88341	2.487	0.174	2.32011	1.47945	1.56823	19:16	3850	-649	5	-7	-2663124	-190544	0.000392091			0.000228507
25	01JH-36 69	4.18329	0.191111	-1.88341	2.292	0.204	2.2917	1.4692	1.55982	19:20	3856	-599	4	-9	-2663124	-190544	0.000443793			0.00028021
26	01JH-36 69	4.36564	0.191111	-1.88341	2.474	0.209	2.25121	1.45082	1.55169	19:23	3874	-594	4	-9	-2663124	-190544	0.000493191			0.000329608
27	01JH-36 69	4.5039	0.191111	-1.88341	2.612	0.216	2.21363	1.42606	1.55227	19:27	3869	-679	5	-8	-2663124	-190544	0.000549844			0.000386261
28	01JH-36 69	4.71129	0.191111	-1.88341	2.819	0.108	2.16351	1.39625	1.54951	19:31	3864	-696	4	-9	-2663124	-190544	0.000436437			0.000272853
29	01JH-36 115 CsRes=120	5.4607	0.191111	-1.88341	3.567	0.17	2.3629	1.51743	1.55717	19:40	2961	-1570	8	-9	-2663124	-190544	0.000279023			0.000115439
30	01JH-36 115 hit crack			-1.88341	3.668	0.174	2.37582	1.52408	1.55885	19:44	2947	-1560	8	-11	-2663124	-190544	0.00102668
31	01JH-36 115	5.41261	0.191111	-1.88341	3.519	0.165	2.3748	1.52377	1.5585	19:48	2969	-1588	8	-11	-2663124	-190544	0.000271865			0.000108282
32	01JH-36 115 hit inclusion			-1.88341	3.446	0.156	2.34982	1.5129	1.5532	19:51	2986	-1560	8	-12	-2663124	-190544	0.00033227
33	01JH-36 5	6.10391	0.191111	-1.88341	4.209	0.193	2.30221	1.48305	1.55235	19:55	2739	-1937	10	-12	-2663124	-190544	0.000342211			0.000178627
34	01JH-36 5	5.73822	0.191111	-1.88341	3.844	0.136	2.29442	1.46776	1.56321	19:59	2773	-1943	10	-14	-2663124	-190544	0.000254838			9.12546e-05
35	01JH-36 5	5.96565	0.191111	-1.88341	4.071	0.214	2.27494	1.45712	1.56126	20:02	2750	-1962	10	-14	-2663124	-190544	0.00114307			0.000979483
36	01JH-36 KIM-5				3.326	0.168	2.22742	1.42973	1.55793	20:09	5987	467	15	-12	-2663124	-190544	0.000155068
37	01JH-36 KIM-5				3.174	0.209	2.19797	1.41612	1.55211	20:12	6025	482	16	-13	-2663124	-190544	0.000184742
38	01JH-36 KIM-5				3.352	0.143	2.1421	1.39085	1.54013	20:16	6098	493	16	-14	-2663124	-190544	0.000170377
39	01JH-36 KIM-5 CsRes=121				3.179	0.16	2.33747	1.49451	1.56404	20:22	6150	497	16	-12	-2663124	-190544	0.000164744
	average and 2SD				3.25775	0.18888											0.000168733
	bracket average and 2SD	5.09		-1.88341	3.197	0.191111											0.000163583	13.7339
sample: W74/3
40	W74/3 KIM-5				3.008	0.182	2.30608	1.48767	1.55014	20:30	-4006	72	10	7	-2663124	-190544	8.81416e-05
41	W74/3 KIM-5				2.938	0.25	2.26956	1.45884	1.55573	20:36	-4006	57	8	6	-2663124	-190544	8.63149e-05
42	W74/3 KIM-5				2.906	0.166	2.24212	1.44382	1.55291	20:39	-4006	40	8	4	-2663124	-190544	8.78205e-05
43	W74/3 KIM-5				2.971	0.18	2.21637	1.43161	1.54817	20:42	-4006	22	8	4	-2663124	-190544	8.84594e-05
	average and 2SD				2.95575	0.0875804											8.76841e-05	2.16534
44	W74/3 152	5.93642	0.185503	-2.11884	3.805	0.25	2.20761	1.41483	1.56033	20:48	18	-3	4	5	-2663124	-190544	0.000260184			0.000171424
45	W74/3 152	6.03463	0.185503	-2.11884	3.903	0.152	2.22255	1.41405	1.57176	20:52	45	10	4	5	-2663124	-190544	0.000259109			0.000170349
46	W74/3 152	6.01258	0.185503	-2.11884	3.881	0.162	2.18657	1.3952	1.56721	20:56	25	18	3	5	-2663124	-190544	0.000348781			0.00026002
47	W74/3 7	6.65995	0.185503	-2.11884	4.527	0.228	2.0236	1.30883	1.54611	21:10	1640	1118	7	11	-2663124	-190544	0.000486807			0.000398046
48	W74/3 7 CsRes=122 crosses crack				2.79	0.194	2.28779	1.44139	1.58721	21:17	1714	1131	3	14	-2663124	-190544	0.000866985
49	W74/3 13	5.71595	0.185503	-2.11884	3.585	0.156	2.25546	1.45442	1.55076	21:21	1839	1782	5	16	-2663124	-190544	0.000315324			0.000226563
50	W74/3 13	5.79211	0.185503	-2.11884	3.661	0.192	2.26623	1.44855	1.56448	21:25	1813	1760	4	16	-2663124	-190544	0.000312078			0.000223317
51	W74/3 13	5.88531	0.185503	-2.11884	3.754	0.15	2.22864	1.43955	1.54814	21:28	1831	1772	4	14	-2663124	-190544	0.000302976			0.000214216
52	W74/3 15	6.76117	0.185503	-2.11884	4.628	0.191	2.23804	1.43024	1.5648	21:32	2247	2116	4	19	-2663124	-190544	0.000169719			8.0959e-05
53	W74/3 15	6.32224	0.185503	-2.11884	4.19	0.176	2.19125	1.4108	1.55319	21:36	2298	2147	4	20	-2663124	-190544	0.000216439			0.000127679
54	W74/3 KIM-5				3.067	0.158	2.1155	1.38487	1.52758	21:40	-3839	-115	18	3	-2663124	-190544	9.29162e-05
55	W74/3 KIM-5 CsRes=123				3.035	0.154	2.28436	1.47656	1.54708	21:46	-3803	-119	18	3	-2663124	-190544	8.87104e-05
56	W74/3 KIM-5				2.769	0.167	2.30521	1.4863	1.55098	21:49	-3766	-129	17	0	-2663124	-190544	8.79673e-05
57	W74/3 KIM-5				2.989	0.195	2.31206	1.49412	1.54744	21:53	-3730	-136	16	0	-2663124	-190544	8.9753e-05
	average and 2SD				2.965	0.269063											8.98367e-05
	bracket average and 2SD	5.09		-2.11884	2.96038	0.185503											8.87604e-05	4.36135
58	W74/3 17	6.34153	0.306446	-2.21746	4.11	0.19	2.30848	1.48637	1.5531	21:57	2208	2462	5	23	-2663124	-190544	0.000235545			0.00014665	Proximal to <85% Concordant U-Pb Analysis
59	W74/3 17	6.31146	0.306446	-2.21746	4.08	0.185	2.26947	1.46819	1.54577	22:01	2255	2473	5	22	-2663124	-190544	0.000221237			0.000132343	Proximal to <85% Concordant U-Pb Analysis
60	W74/3 17	6.2383	0.306446	-2.21746	4.007	0.208	2.25592	1.46189	1.54315	22:04	2241	2491	4	23	-2663124	-190544	0.000230333			0.000141438	Proximal to <85% Concordant U-Pb Analysis
61	W74/3 30	6.12404	0.306446	-2.21746	3.893	0.217	2.22297	1.44178	1.54182	22:08	-271	2967	14	27	-2663124	-190544	0.000263062			0.000174167
62	W74/3 30	5.75422	0.306446	-2.21746	3.524	0.175	2.2244	1.43904	1.54575	22:12	-226	2930	14	26	-2663124	-190544	0.000219474			0.000130579
63	W74/3 32	6.21625	0.306446	-2.21746	3.985	0.21	2.24856	1.42246	1.58075	22:16	-1148	2688	18	24	-2663124	-190544	0.00407894			0.00399005	Proximal to <85% Concordant U-Pb Analysis
64	W74/3 32	5.92761	0.306446	-2.21746	3.697	0.185	2.19675	1.41632	1.55103	22:19	-1160	2669	18	23	-2663124	-190544	0.00059432			0.000505426	Proximal to <85% Concordant U-Pb Analysis
65	W74/3 32	6.27939	0.306446	-2.21746	4.048	0.201	2.1748	1.41483	1.53714	22:22	-1162	2682	18	23	-2663124	-190544	0.000418957			0.000330062	Proximal to <85% Concordant U-Pb Analysis
66	W74/3 36	5.9236	0.306446	-2.21746	3.693	0.164	2.17476	1.40826	1.54429	22:26	55	1980	11	18	-2663124	-190544	0.000173264			8.437e-05
67	W74/3 36	5.86046	0.306446	-2.21746	3.63	0.165	2.14991	1.39864	1.53715	22:29	9	1948	11	17	-2663124	-190544	0.000169665			8.07706e-05
68	W74/3 41 CsRes=125	6.18819	0.306446	-2.21746	3.957	0.163	2.60374	1.66462	1.56416	22:36	516	2421	10	24	-2663124	-190544	0.000181056			9.21615e-05
69	W74/3 41	6.1962	0.306446	-2.21746	3.965	0.196	2.65431	1.71551	1.54724	22:39	478	2429	10	22	-2663124	-190544	0.000242475			0.000153581
70	W74/3 41	6.34553	0.306446	-2.21746	4.114	0.24	2.6335	1.71141	1.53879	22:43	450	2406	10	21	-2663124	-190544	0.000174838			8.59432e-05
71	W74/3 58	6.12505	0.306446	-2.21746	3.894	0.223	2.63491	1.68923	1.55983	22:47	1076	-6	5	6	-2663124	-190544	0.000200308			0.000111414
72	W74/3 58	5.98674	0.306446	-2.21746	3.756	0.215	2.5809	1.67538	1.54049	22:50	1128	21	4	5	-2663124	-190544	0.000248323			0.000159429
73	W74/3 KIM-5				2.747	0.117	2.55094	1.65528	1.5411	22:54	-4068	72	20	3	-2663124	-190544	8.8502e-05
74	W74/3 KIM-5				2.68	0.179	2.57856	1.65794	1.55528	22:57	-4068	51	20	3	-2663124	-190544	8.72157e-05
75	W74/3 KIM-5				2.718	0.18	2.57644	1.6647	1.54769	23:00	-4063	26	20	3	-2663124	-190544	8.72535e-05
76	W74/3 KIM-5				2.885	0.179	2.53777	1.64601	1.54178	23:04	-4065	1	20	2	-2663124	-190544	8.88376e-05
	average and 2SD				2.7575	0.178636											8.79522e-05
	bracket average and 2SD	5.09		-2.21746	2.86125	0.306446											8.88945e-05	4.11999
77	W74/3 62	7.56178	0.145698	-2.28848	5.256	0.152	2.52125	1.60615	1.56975	23:08	1373	130	3	6	-2663124	-190544	0.000264373			0.000176608
78	W74/3 62	7.93864	0.145698	-2.28848	5.632	0.183	2.52576	1.59371	1.58483	23:11	1387	117	3	5	-2663124	-190544	0.000226399			0.000138634
79	W74/3 62	7.76224	0.145698	-2.28848	5.456	0.151	2.50311	1.58956	1.57472	23:15	1383	67	3	4	-2663124	-190544	0.000324921			0.000237156
80	W74/3 74	6.34299	0.145698	-2.28848	4.04	0.257	2.44331	1.58154	1.54489	23:19	2169	1494	3	13	-2663124	-190544	0.000249839			0.000162074	Proximal to <85% Concordant U-Pb Analysis
81	W74/3 74	6.40012	0.145698	-2.28848	4.097	0.191	2.44499	1.56734	1.55996	23:22	2170	1527	2	13	-2663124	-190544	0.000260278			0.000172513	Proximal to <85% Concordant U-Pb Analysis
82	W74/3 114	6.03629	0.145698	-2.28848	3.734	0.174	2.40969	1.53992	1.56481	23:26	1909	-1132	0	-4	-2663124	-190544	0.000401042			0.000313277
83	W74/3 114	6.03529	0.145698	-2.28848	3.733	0.188	2.30222	1.4886	1.54656	23:29	1867	-1129	0	-4	-2663124	-190544	0.000259902			0.000172137
84	W74/3 114	5.98517	0.145698	-2.28848	3.683	0.19	2.2662	1.45931	1.55293	23:33	1875	-1109	0	-3	-2663124	-190544	0.000228704			0.000140939
85	W74/3 131 missed CL domain	5.91802	0.145698	-2.28848	3.616	0.175	2.24785	1.41972	1.5833	23:37	-571	-378	9	3	-2663124	-190544	0.000908255			0.00082049	Irregular Texture/Zoning: Alteration Suspected
86	W74/3 131 missed CL domain	5.55419	0.145698	-2.28848	3.253	0.169	2.21617	1.40595	1.57628	23:41	-569	-362	8	3	-2663124	-190544	0.000681436			0.000593671	Irregular Texture/Zoning: Alteration Suspected
87	W74/3 133	6.6507	0.145698	-2.28848	4.347	0.175	2.17313	1.38808	1.56557	23:44	-879	-1206	11	-3	-2663124	-190544	0.000234476			0.000146711
88	W74/3 133 CsRes=127	6.45926	0.145698	-2.28848	4.156	0.175	2.52252	1.59492	1.5816	23:51	-882	-1187	11	-3	-2663124	-190544	0.000211223			0.000123458
89	W74/3 133	6.25479	0.145698	-2.28848	3.952	0.205	2.56514	1.62977	1.57393	23:55	-836	-1174	11	-3	-2663124	-190544	0.000231154			0.000143389
90	W74/3 134	7.04861	0.145698	-2.28848	4.744	0.196	2.60993	1.67253	1.56047	23:58	-615	-1003	11	-3	-2663124	-190544	0.000245469			0.000157704
91	W74/3 134	6.99949	0.145698	-2.28848	4.695	0.164	2.64467	1.67921	1.57494	00:01	-602	-951	10	-2	-2663124	-190544	0.00023281			0.000145045
92	W74/3 KIM-5				2.796	0.162	2.53121	1.64362	1.54002	00:05	-3956	70	18	3	-2663124	-190544	8.67035e-05
93	W74/3 KIM-5				2.847	0.208	2.52576	1.62911	1.5504	00:08	-3949	47	18	3	-2663124	-190544	8.78098e-05
94	W74/3 KIM-5				2.865	0.173	2.5143	1.62574	1.54655	00:11	-3951	21	18	2	-2663124	-190544	8.75699e-05
95	W74/3 KIM-5				2.781	0.168	2.49262	1.61307	1.54527	00:15	-3950	-9	19	2	-2663124	-190544	8.82285e-05
	average and 2SD				2.82225	0.0802558											8.75779e-05
	bracket average and 2SD	5.09		-2.28848	2.78987	0.145698											8.77651e-05	1.64302
96	W74/3 143	5.45601	0.230517	-1.38943	4.059	0.244	2.49185	1.59062	1.56659	00:19	-1358	1438	-1	15	-2663124	-190544	0.000816874			0.000718891	Irregular Texture/Zoning: Alteration Suspected
97	W74/3 143	5.46001	0.230517	-1.38943	4.063	0.178	2.40362	1.55694	1.54381	00:23	-1397	1416	0	14	-2663124	-190544	0.000373534			0.000275552
98	W74/3 143 hit crack			-1.38943	3.354	0.221	2.40748	1.51794	1.58602	00:26	-1363	1428	-1	14	-2663124	-190544	0.00177918
99	W74/3 154 missed CL domain	5.52811	0.230517	-1.38943	4.131	0.231	2.35676	1.5012	1.56992	00:30	395	756	-8	10	-2663124	-190544	0.000164031			6.60479e-05
100	W74/3 154 missed CL domain	5.3038	0.230517	-1.38943	3.907	0.253	2.34324	1.49478	1.56761	00:33	409	783	-8	10	-2663124	-190544	0.000162143			6.41602e-05
101	W74/3 170	5.40594	0.230517	-1.38943	4.009	0.245	2.3135	1.48418	1.55877	00:37	163	-814	-7	0	-2663124	-190544	0.000229117			0.000131135
102	W74/3 170	5.36188	0.230517	-1.38943	3.965	0.16	2.28376	1.4649	1.55899	00:40	223	-798	-8	1	-2663124	-190544	0.000219528			0.000121545
103	W74/3 170	5.28177	0.230517	-1.38943	3.885	0.122	2.29182	1.46662	1.56266	00:44	173	-823	-8	0	-2663124	-190544	0.000272814			0.000174832
104	W74/3 174	5.54914	0.230517	-1.38943	4.152	0.222	2.28512	1.46083	1.56426	00:47	1264	-1923	-14	-10	-2663124	-190544	0.00022652			0.000128537
105	W74/3 174	5.77946	0.230517	-1.38943	4.382	0.185	2.22296	1.43333	1.5509	00:51	1272	-1941	13	-10	-2663124	-190544	0.000210841			0.000112858
106	W74/3 KIM-5				3.092	0.138	2.16457	1.41784	1.52666	00:54	-4027	65	29	3	-2663124	-190544	0.000108927
107	W74/3 KIM-5				3.064	0.209	2.17622	1.39864	1.55596	00:58	-4039	43	-1	4	-2663124	-190544	0.000114049
108	W74/3 KIM-5 CsRes=128				2.933	0.16	2.3563	1.48641	1.58523	01:04	-4039	28	-1	6	-2663124	-190544	0.000106544
109	W74/3 KIM-5				2.912	0.164	2.32625	1.4958	1.55519	01:07	-4036	11	-1	4	-2663124	-190544	0.000104031
	average and 2SD				3.00025	0.181816											0.000108388
	bracket average and 2SD	5.09		-1.38943	3.6935	0.230517											9.79828e-05	23.4265
Session #8 Date: 3/1 to 3/2/2017
sample: 01JH-13b
296	01JH-13b KIM-5				4.138	0.264	2.52848	1.49897	1.68681	21:03:00	-323	5102	36	10	-1858188	-190192	0.000454192
297	01JH-13b KIM-5				3.965	0.217	2.53691	1.50096	1.69018	21:07:00	-299	5101	35	9	-1858188	-190192	0.000459969
298	01JH-13b KIM-5; Cs 123				3.936	0.24	2.66922	1.5666	1.70383	21:13:00	-270	5098	36	9	-1858188	-190192	0.00045296
299	01JH-13b KIM-5				3.849	0.289	2.67833	1.59261	1.68172	21:16:00	-241	5097	37	9	-1858188	-190192	0.000456526
	average and 2SD	5.09		-1.11234	3.972	0.242295											0.000455912	1.35229
300	01JH-13b 2.5NM 7-2 core CL dark	6.37968	0.185539	-1.10662	5.266	0.219	2.73351	1.61561	1.69194	21:31:00	-3494	3648	22	-6	-1858188	-190192	0.000650001			0.000131327
301	01JH-13b 2.5NM 7-2 rim oscillatory	6.4938	0.185539	-1.10662	5.38	0.219	2.74487	1.62582	1.6883	21:35:00	-3574	3669	22	-5	-1858188	-190192	0.000540657			2.19828e-05
302	01JH-13b 2.5NM 7-2 sector zone bright core	5.95321	0.185539	-1.10662	4.84	0.27	2.71895	1.61221	1.68647	21:38:00	-3445	3652	25	-6	-1858188	-190192	0.000637288			0.000118614
303	01JH-13b 2.5NM 12-1 remnant oscillatory rim	6.0413	0.185539	-1.10662	4.928	0.222	2.69554	1.59656	1.68834	21:43:00	-4617	2538	16	-8	-1858188	-190192	0.000527202			8.52777e-06
304	01JH-13b 2.5NM 12-1 core little CL	6.24753	0.185539	-1.10662	5.134	0.22	2.70525	1.60094	1.68978	21:46:00	-4612	2575	16	-8	-1858188	-190192	0.000562264			4.35905e-05
305	01JH-13b 5M 9-1 CL dark core	9.34	0.185539	-1.10662	8.223	0.259	2.68057	1.57309	1.70401	21:54:00	2986	-2966	23	-18	-1858188	-190192	0.000735253			0.000216579
306	01JH-13b 5M 9-1 CL medium mantle	9.88	0.185539	-1.10662	8.767	0.311	2.62657	1.55886	1.68493	21:58:00	3035	-2962	23	-18	-1858188	-190192	0.000611564			9.28897e-05
307	01JH-13b 5M 9-1 CL dark oscillatory rim	5.93	0.185539	-1.10662	4.813	0.243	2.62913	1.55005	1.69615	22:01:00	3057	-2964	22	-18	-1858188	-190192	0.000589068			7.03944e-05
308	01JH-13b 5M 10-4 no good CL	5.12229	0.185539	-1.10662	4.01	0.205	2.5766	1.54078	1.67226	22:06:00	655	-3257	34	-20	-1858188	-190192	0.000520201			1.52728e-06
309	01JH-13b 5M 10-4 no good CL rim	5.02518	0.185539	-1.10662	3.913	0.248	2.56392	1.53171	1.67389	22:09:00	705	-3237	34	-20	-1858188	-190192	0.000515603			-3.07062e-06
310	01JH-13b KIM-5				3.938	0.227	2.549	1.52162	1.67519	22:13:00	-321	5083	25	9	-1858188	-190192	0.000911863
311	01JH-13b KIM-5				4.011	0.248	2.50738	1.51395	1.65618	22:17:00	-298	5081	25	13	-1858188	-190192	0.000467473
312	01JH-13b KIM-5				3.912	0.234	2.52851	1.50664	1.67825	22:20:00	-275	5080	26	9	-1858188	-190192	0.000473773
313	01JH-13b KIM-5				4.073	0.28	2.51086	1.50269	1.67092	22:23:00	-257	5073	26	9	-1858188	-190192	0.000472636
	average and 2SD	5.09		-1.1009	3.9835	0.145826											0.000581436
	bracket average and 2SD	5.09		-1.10662	3.97775	0.185539											0.000518674	61.3401
314	01JH-13b 5M 12-2 intruding dark CL	6.11784	0.232029	-1.1836	4.927	0.277	2.49482	1.48242	1.68293	22:30:00	-273	-3621	33	-22	-1858188	-190192	0.000662708			0.000127628	Irregular Texture/Zoning: Alteration Suspected
315	01JH-13b 5M 12-2 CL darker oscillatory rim	6.0848	0.232029	-1.1836	4.894	0.237	2.49368	1.47832	1.68683	22:33:00	-210	-3576	32	-21	-1858188	-190192	0.000898727			0.000363647
316	01JH-13b 5M 12-2 CL unintruded core	6.32609	0.232029	-1.1836	5.135	0.234	2.46018	1.47824	1.66427	22:37:00	-338	-3583	33	-21	-1858188	-190192	0.000728599			0.000193518
317	01JH-13b 5M 12-2 intruding dark CL core 2	5.87555	0.232029	-1.1836	4.685	0.249	2.44761	1.46955	1.66554	22:40:00	-262	-3612	33	-21	-1858188	-190192	0.000758194			0.000223114	Irregular Texture/Zoning: Alteration Suspected
318	01JH-13b 5M 13-2 CL darker rim	6.52833	0.232029	-1.1836	5.337	0.267	2.46194	1.47112	1.67352	22:44:00	361	-3759	31	-25	-1858188	-190192	0.00063296			9.78788e-05
319	01JH-13b 5M 13-2 CL brighter core	6.01071	0.232029	-1.1836	4.82	0.251	2.48319	1.46537	1.69459	22:48:00	386	-3706	31	-22	-1858188	-190192	0.000666816			0.000131735
320	01JH-13b 5M 13-2 CL brighter core but more muddled	6.28504	0.232029	-1.1836	5.094	0.289	2.47309	1.46404	1.68923	22:51:00	453	-3718	31	-22	-1858188	-190192	0.00054952			1.44391e-05
321	01JH-13b 5M 22-4 damaged rim?	6.48728	0.232029	-1.1836	5.296	0.25	2.46626	1.46138	1.68763	22:56:00	2353	-5294	36	-34	-1858188	-190192	0.000539505			4.42414e-06
322	01JH-13b 5M 22-4 brighter remnant oscillatory	6.38115	0.232029	-1.1836	5.19	0.232	2.48322	1.46189	1.69864	23:00:00	2247	-5253	36	-33	-1858188	-190192	0.0015248			0.00098972
323	01JH-13b 5M 22-4 no discernible CL change	6.48928	0.232029	-1.1836	5.298	0.286	2.50737	1.47018	1.70548	23:04:00	2288	-5263	36	-33	-1858188	-190192	0.00173132			0.00119624
324	01JH-13b KIM-5				3.905	0.23	2.49502	1.47648	1.68984	23:07:00	-250	5123	27	10	-1858188	-190192	0.000541409
325	01JH-13b KIM-5				3.853	0.278	2.49341	1.48	1.68474	23:11:00	-230	5121	27	11	-1858188	-190192	0.000469453
326	01JH-13b KIM-5				3.699	0.199	2.49932	1.48395	1.68424	23:14:00	-221	5108	27	10	-1858188	-190192	0.000469218
327	01JH-13b KIM-5				3.812	0.237	2.4892	1.4834	1.67804	23:17:00	-222	5092	27	10	-1858188	-190192	0.000474821
	average and 2SD	5.09		-1.2663	3.81725	0.175076											0.000488725
	bracket average and 2SD	5.09		-1.1836	3.90038	0.232029											0.000535081	57.6476
sample: 01JH-36
330	01JH-36 UWQ-1				4.865	0.274	2.54459	1.4728	1.72772	23:47:00	997	-5591	-3	-5	-1858188	-190192	0.000268597
331	01JH-36 UWQ-1				4.799	0.224	2.54718	1.47077	1.73187	23:51:00	1025	-5595	-3	-5	-1858188	-190192	0.000277474
332	01JH-36 UWQ-1				4.79	0.287	2.50399	1.46494	1.70928	23:54:00	1025	-5611	-3	-6	-1858188	-190192	0.000294057
333	01JH-36 UWQ-1				4.971	0.255	2.46174	1.4624	1.68336	23:57:00	994	-5606	-3	-6	-1858188	-190192	0.000309969
	average and 2SD	12.33		-7.38272	4.85625	0.166976											0.000287524	12.7358
334	01JH-36 KIM-5				4.216	0.436	2.40243	1.44667	1.66066	00:01:00	6955	424	24	13	-1858188	-190192	0.000499038
335	01JH-36 KIM-5				3.93	0.241	2.39802	1.43572	1.67026	00:05:00	6983	408	24	12	-1858188	-190192	0.000488571
336	01JH-36 KIM-5				4.078	0.207	2.34891	1.41913	1.65517	00:08:00	7060	380	25	12	-1858188	-190192	0.000480219
337	01JH-36 KIM-5				4.076	0.253	2.31968	1.40157	1.65506	00:11:00	7100	367	25	12	-1858188	-190192	0.000493242
	average and 2SD	5.09		-1.00986	4.075	0.233569											0.000490268	44.5291
338	01JH-36 5M 69 relatively CL dark disc rim	4.52643	0.148947	-1.00986	3.512	0.223	2.29273	1.38976	1.64973	00:16:00	4904	-667	4	17	-1858188	-190192	0.000824004			0.000537916	Irregular Texture/Zoning: Alteration Suspected
339	01JH-36 5M 69 relatively CL dark bleb	3.9048	0.148947	-1.00986	2.891	0.262	2.24752	1.3589	1.65393	00:20:00	4916	-368	5	16	-1858188	-190192	0.000799626			0.000513538	Irregular Texture/Zoning: Alteration Suspected
340	01JH-36 10M 56-2 oscillatory core, Cs-res 124	5.25316	0.148947	-1.00986	4.238	0.193	2.45334	1.4489	1.69324	00:35:00	-1453	-1355	0	15	-1858188	-190192	0.00125188			0.000965788	Irregular Texture/Zoning: Alteration Suspected
341	01JH-36 10M 56-2 oscillatory rim	5.86178	0.148947	-1.00986	4.846	0.251	2.43739	1.44562	1.68606	00:39:00	-1364	-1388	-2	14	-1858188	-190192	0.00265711			0.00237102	Irregular Texture/Zoning: Alteration Suspected
342	01JH-36 10M 57 bright CL core remnant?	4.83975	0.148947	-1.00986	3.825	0.266	2.41842	1.44088	1.67843	00:42:00	-1381	-1143	-1	15	-1858188	-190192	0.000669856			0.000383768	Irregular Texture/Zoning: Alteration Suspected
343	01JH-36 10M 57 darker CL remnant banding	4.86077	0.148947	-1.00986	3.846	0.29	2.42363	1.44131	1.68154	00:46:00	-1426	-1119	-2	15	-1858188	-190192	0.000885248			0.000599159	Irregular Texture/Zoning: Alteration Suspected
344	01JH-36 10M 57 CL damaged core?	4.9939	0.148947	-1.00986	3.979	0.214	2.42202	1.43615	1.68647	00:49:00	-1453	-1149	-2	15	-1858188	-190192	0.00105871			0.000772624	Irregular Texture/Zoning: Alteration Suspected
345	01JH-36 10M 59 oscillatory rim	5.4904	0.148947	-1.00986	4.475	0.214	2.41589	1.43423	1.68445	00:53:00	-1888	-906	0	15	-1858188	-190192	0.000834215			0.000548126
346	01JH-36 10M 59 less oscillatory core	5.63555	0.148947	-1.00986	4.62	0.272	2.40724	1.4297	1.68375	00:56:00	-1894	-835	0	15	-1858188	-190192	0.000882363			0.000596275
347	01JH-36 10M 60 heavily damaged core	7.96891	0.148947	-1.00986	6.951	0.186	2.44753	1.41929	1.72447	01:00:00	-1821	44	1	17	-1858188	-190192	0.0124478			0.0121617	Irregular Texture/Zoning: Alteration Suspected
348	01JH-36 10M 60 CL bright lower portion	4.9889	0.148947	-1.00986	3.974	0.191	2.37445	1.41823	1.67423	01:04:00	-1808	-100	0	17	-1858188	-190192	0.000614109			0.000328021	Irregular Texture/Zoning: Alteration Suspected
349	01JH-36 10M 60 CL dark not as damaged	5.46538	0.148947	-1.00986	4.45	0.23	2.37735	1.41749	1.67715	01:07:00	-1863	60	1	17	-1858188	-190192	0.00164462			0.00135853	Irregular Texture/Zoning: Alteration Suspected
350	01JH-36 10M 225 mottled core	6.54947	0.148947	-1.00986	5.533	0.323	2.33174	1.40963	1.65415	01:11:00	-1822	503	2	19	-1858188	-190192	0.00999344			0.00970735	Irregular Texture/Zoning: Alteration Suspected
351	01JH-36 10M 225 oscillatory rim	5.3863	0.148947	-1.00986	4.371	0.199	2.36173	1.40642	1.67925	01:14:00	-1894	460	2	19	-1858188	-190192	0.000865713			0.000579625	Irregular Texture/Zoning: Alteration Suspected
352	01JH-36 UWQ-1				4.961	0.254	2.39577	1.39696	1.71499	01:18:00	918	-5584	5	-6	-1858188	-190192	0.000268632
353	01JH-36 UWQ-1				4.957	0.243	2.35173	1.39418	1.68682	01:22:00	917	-5599	4	-7	-1858188	-190192	0.000285733
354	01JH-36 UWQ-1				4.876	0.28	2.40993	1.39199	1.73129	01:25:00	936	-5585	4	-6	-1858188	-190192	0.000287468
355	01JH-36 UWQ-1				4.953	0.249	2.35431	1.38381	1.70132	01:28:00	946	-5599	4	-6	-1858188	-190192	0.000296776
	average and 2SD	12.33		-7.3032	4.93675	0.0812629											0.000284652
	bracket average and 2SD	12.33		-7.34296	4.8965	0.148947											0.000286088	10.009
sample: 01JH-47b/113
356	01JH-113 un 1 mottled core	4.95586	0.319074	-1.00986	3.941	0.289	2.35893	1.42207	1.6588	01:41:00	-1000	205	13	-5	-1858188	-190192	0.00337265			0.00309297	Irregular Texture/Zoning: Alteration Suspected
357	01JH-113 un 1 mottled rim	5.4834	0.319074	-1.00986	4.468	0.219	2.34977	1.37	1.71515	01:45:00	-926	151	9	-8	-1858188	-190192	0.00172369			0.00144402	Irregular Texture/Zoning: Alteration Suspected
358	01JH-113 un 1 mottled core 2	5.60152	0.319074	-1.00986	4.586	0.186	2.35753	1.38315	1.70446	01:48:00	-954	177	9	-8	-1858188	-190192	0.00107277			0.000793103	Irregular Texture/Zoning: Alteration Suspected
359	01JH-113 un 2 intruding CL into core Cs-res 125	4.60151	0.319074	-1.00986	3.587	0.288	2.53245	1.46689	1.72641	01:54:00	-1155	-10	9	-8	-1858188	-190192	0.000976512			0.000696841	Irregular Texture/Zoning: Alteration Suspected
360	01JH-113 un 2 bright oscillatory rim	5.41433	0.319074	-1.00986	4.399	0.239	2.56735	1.4994	1.71225	01:57:00	-1142	81	9	-8	-1858188	-190192	0.000805341			0.00052567	Irregular Texture/Zoning: Alteration Suspected
361	01JH-113 un 3 damaged core	5.1881	0.319074	-1.00986	4.173	0.262	2.5798	1.51344	1.70459	02:02:00	-1522	-720	12	-11	-1858188	-190192	0.00263472			0.00235504	Irregular Texture/Zoning: Alteration Suspected
362	01JH-113 un 3 heavily damaged rim	4.9959	0.319074	-1.00986	3.981	0.256	2.61062	1.52342	1.71366	02:05:00	-1473	-780	12	-11	-1858188	-190192	0.00291698			0.00263731	Irregular Texture/Zoning: Alteration Suspected
363	01JH-113 un 3 relatively oscillatory area	5.27018	0.319074	-1.00986	4.255	0.196	2.60488	1.52338	1.70994	02:09:00	-1580	-682	12	-11	-1858188	-190192	0.0012238			0.00094413	Irregular Texture/Zoning: Alteration Suspected
364	(01JH-47b 2 relatively damaged area)	1.38826	0.319074	-1.00986	0.377	0.16	2.61889	1.52893	1.71288	02:16:00	-461	1567	5	-4	-1858188	-190192	0.00540465			0.00512498	Irregular Texture/Zoning: Alteration Suspected
365	(01JH-47b 2 relatively oscillatory area)	0.880749	0.319074	-1.00986	-0.13	0.237	2.56411	1.52776	1.67835	02:20:00	-478	1532	5	-4	-1858188	-190192	0.000625467			0.000345796	Irregular Texture/Zoning: Alteration Suspected
366	(01JH-47b 3 relatively oscillatory area)	4.50441	0.319074	-1.00986	3.49	0.237	2.57996	1.52631	1.69033	02:24:00	-277	1602	5	-4	-1858188	-190192	0.000717976			0.000438306	Irregular Texture/Zoning: Alteration Suspected
367	(01JH-47b 3 no CL zoning)	3.88478	0.319074	-1.00986	2.871	0.204	2.58476	1.52252	1.69769	02:28:00	-267	1622	4	-4	-1858188	-190192	0.00078915			0.000509479	Irregular Texture/Zoning: Alteration Suspected
sample: 01JH-36
368	01JH-36 UWQ-1				4.726	0.212	2.59241	1.50695	1.7203	02:44:00	1088	-5435	2	-1	-1858188	-190192	0.000242168
369	01JH-36 UWQ-1				4.501	0.213	2.61907	1.50327	1.74224	02:47:00	1106	-5434	1	-2	-1858188	-190192	0.000245817
370	01JH-36 UWQ-1				4.929	0.248	2.48208	1.50151	1.65306	02:51:00	1088	-5447	0	-3	-1858188	-190192	0.000273025
371	01JH-36 UWQ-1				4.846	0.255	2.52979	1.50073	1.68571	02:54:00	1091	-5462	0	-4	-1858188	-190192	0.000337746
	average and 2SD	12.33		-7.48718	4.7505	0.372081											0.000274689
	bracket average and 2SD	12.33		-7.39519	4.84362	0.319074											0.000279671
372	01JH-36 2.5M 174 oscillatory core	5.61553	0.288765	-1.00986	4.6	0.173	2.49759	1.48692	1.6797	02:59:00	5314	-3291	10	16	-1858188	-190192	0.000731027			0.000452592
373	01JH-36 2.5M 174 less oscillatory core	5.4864	0.288765	-1.00986	4.471	0.225	2.48148	1.48172	1.67473	03:02:00	5343	-3364	11	17	-1858188	-190192	0.00067794			0.000399505
374	01JH-36 2.5M 35 oscillatory core	5.63755	0.288765	-1.00986	4.622	0.215	2.46631	1.47155	1.67599	03:06:00	5209	-4246	13	16	-1858188	-190192	0.00055479			0.000276355
375	01JH-36 2.5M 35 oscillatory rim	5.6846	0.288765	-1.00986	4.669	0.22	2.45255	1.46568	1.67331	03:10:00	5317	-4185	14	16	-1858188	-190192	0.000455822			0.000177387
376	01JH-36 2.5M Un 2 oscillatory core (mineralized fracture)			-1.00986	5.074	0.197	2.43023	1.45645	1.6686	03:13:00	5628	-4265	15	19	-1858188	-190192	0.000541502				Irregular Analysis: Fracture/Inclusion
377	01JH-36 2.5M Un qz inclusion	12.8423	0.288765	-7.43285	5.314	0.227	2.45951	1.44691	1.69984	03:17:00	5655	-4181	15	19	-1858188	-190192	0.00024873			0
378	01JH-36 2.5M31 relatively oscillatory core	4.66357	0.288765	-1.00986	3.649	0.237	2.42449	1.43646	1.68782	03:22:00	4609	-3262	7	14	-1858188	-190192	0.000690666			0.000412231	Irregular Texture/Zoning: Alteration Suspected
379	01JH-36 2.5M31 relatively oscillatory rim	5.52744	0.288765	-1.00986	4.512	0.216	2.40109	1.43416	1.67422	03:25:00	4510	-3222	7	13	-1858188	-190192	0.00129228			0.00101384	Irregular Texture/Zoning: Alteration Suspected
380	01JH-36 10M 224 very damaged area	5.46938	0.288765	-1.00986	4.454	0.21	2.40537	1.43118	1.68068	03:30:00	-1872	697	-2	20	-1858188	-190192	0.00132815			0.00104972	Irregular Texture/Zoning: Alteration Suspected
381	01JH-36 10M 224 equally bad area	5.40932	0.288765	-1.00986	4.394	0.21	2.40223	1.42743	1.68291	03:34:00	-1823	719	-1	20	-1858188	-190192	0.000915			0.000636565	Irregular Texture/Zoning: Alteration Suspected
382	01JH-36 5M 86-2 CL dark core	4.97188	0.288765	-1.00986	3.957	0.251	2.39958	1.42046	1.68929	03:38:00	593	1115	-4	19	-1858188	-190192	0.00105737			0.000778938	Irregular Texture/Zoning: Alteration Suspected
383	01JH-36 5M 86-2 CL oscillatory area	5.11302	0.288765	-1.00986	4.098	0.226	2.36284	1.41581	1.6689	03:41:00	530	1190	-3	20	-1858188	-190192	0.000603588			0.000325153
384	01JH-36 UWQ-1				4.782	0.221	2.42075	1.40728	1.72016	03:45:00	1130	-5471	1	-3	-1858188	-190192	0.000265066
385	01JH-36 UWQ-1				4.912	0.271	2.37041	1.39872	1.69471	03:49:00	1129	-5484	1	-4	-1858188	-190192	0.000314751
386	01JH-36 UWQ-1 Cs-res 126				4.808	0.277	2.49671	1.4651	1.70413	03:54:00	1108	-5481	1	-4	-1858188	-190192	0.000269755
387	01JH-36 UWQ-1				4.94	0.23	2.50417	1.4933	1.67694	03:58:00	1089	-5480	1	-4	-1858188	-190192	0.000279151
	average and 2SD	12.33		-7.37852	4.8605	0.15445											0.000282181
	bracket average and 2SD	12.33		-7.43285	4.8055	0.288765											0.000278435	23.5114
sample: 01JH-54b
388	01JH-54b KIM-5				3.125	0.304	2.55758	1.53081	1.67074	04:13:00	-509	6205	-10	48	-1858188	-190192	0.000447636
389	01JH-54b KIM-5				3.016	0.301	2.58812	1.5677	1.6509	04:16:00	-493	6195	-10	48	-1858188	-190192	0.000464998
390	01JH-54b KIM-5				2.94	0.293	2.70994	1.64135	1.65104	04:19:00	-479	6188	-10	48	-1858188	-190192	0.000473348
391	01JH-54b KIM-5				2.871	0.261	2.78244	1.7127	1.6246	04:23:00	-484	6223	-11	48	-1858188	-190192	0.000474621
392	01JH-54b 2.5NM-2 1-1	6.65853	0.352671	-2.01114	4.634	0.195	2.93291	1.77477	1.65255	04:27:00	3875	1647	-19	28	-1858188	-190192	0.000580243			0.000172123
393	01JH-54b 2.5NM-2 1-1 a little brighter oscillatory Cs-res 125	6.65653	0.352671	-2.01114	4.632	0.192	2.80512	1.70002	1.65005	04:34:00	3919	1487	-18	28	-1858188	-190192	0.000525213			0.000117093
394	01JH-54b 2.5NM-2 14-3 straight in CL dark core	7.41806	0.352671	-2.01114	5.392	0.255	2.66663	1.58295	1.6846	04:38:00	-357	1933	20	-14	-1858188	-190192	0.000614088			0.000205968
395	01JH-54b 2.5NM-2 14-3 oscillatory mantle	7.4892	0.352671	-2.01114	5.463	0.241	2.55981	1.51403	1.69073	04:42:00	-347	1988	20	-13	-1858188	-190192	0.000564437			0.000156318
396	01JH-54b 2.5NM-2 14-3 darker rim	7.53128	0.352671	-2.01114	5.505	0.184	2.48809	1.47241	1.68981	04:46:00	-318	1800	21	-15	-1858188	-190192	0.000646035			0.000237915
397	01JH-54b 2.5NM-1 7-1 oscillatory core (mineralized fracture)			-2.01114	5.461	0.239	2.37635	1.41245	1.68244	04:51:00	405	-2908	58	-11	-1858188	-190192	0.00201501				Irregular Analysis: Fracture/Inclusion
398	01JH-54b 2.5NM-1 7-1 bright spot Cs-res 126	7.26575	0.352671	-2.01114	5.24	0.312	2.50023	1.46126	1.71101	04:57:00	516	-2861	53	-8	-1858188	-190192	0.00056339			0.000155271
399	01JH-54b 2.5NM-1 9-2 CL dark core	6.76875	0.352671	-2.01114	4.744	0.218	2.57732	1.50214	1.71577	05:03:00	3660	-3758	3	11	-1858188	-190192	0.000650428			0.000242308
400	01JH-54b 2.5NM-1 9-2 oscillatory mantle	6.67055	0.352671	-2.01114	4.646	0.248	2.52807	1.49662	1.68919	05:07:00	3730	-3689	28	10	-1858188	-190192	0.000521867			0.000113747
401	01JH-54b 2.5NM-1 9-2 darker rim	6.78779	0.352671	-2.01114	4.763	0.241	2.51667	1.49103	1.68788	05:10:00	3866	-3843	26	10	-1858188	-190192	0.000564188			0.000156068
402	01JH-54b KIM-5				3.422	0.208	2.30244	1.46705	1.56943	05:14:00	-442	6215	15	43	-1858188	-190192	0.000664795
403	01JH-54b KIM-5				3.158	0.257	2.30266	1.47002	1.56641	05:18:00	-446	6150	14	44	-1858188	-190192	0.000540331
404	01JH-54b KIM-5				2.919	0.313	2.32599	1.45461	1.59904	05:22:00	-462	6175	-10	48	-1858188	-190192	0.000522988
405	01JH-54b KIM-5				3.098	0.278	2.33838	1.44831	1.61455	05:25:00	-517	6179	-10	46	-1858188	-190192	0.00051402
	average and 2SD	5.09		-1.93092	3.14925	0.416511											0.000576038
	bracket average and 2SD	5.09		-2.01114	3.06862	0.352671											0.00040812	33.907
sample: 01JH-42a
406	01JH-42a 2.5NM Un 3 dark CL sector zoned	6.7856	0.345131	-1.97619	4.796	0.225	2.36784	1.40904	1.68046	05:34:00	-1983	135	7	9	-1858188	-190192	0.00090011			0.000388627	Irregular Texture/Zoning: Alteration Suspected
407	01JH-42a 2.5NM Un 3 bright remnant oscillatory Cs-res 127	7.04612	0.345131	-1.97619	5.056	0.227	2.49776	1.47088	1.69814	05:40:00	-2118	223	7	9	-1858188	-190192	0.000802508			0.000291024	Irregular Texture/Zoning: Alteration Suspected
408	01JH-42a 2.5NM Un 3 medium dark CL sector zoned			-1.97619	5.152	20.785	0.0129025	0.740391	0.0174267	05:44:00	-2161	191	-1	8	-1858188	-190192	0.0300976				Irregular Analysis
409	01JH-42a 2.5NM 75 damaged area, lost HV			-1.97619	106058	1194.46	-5.12197e-06	0													Irregular Analysis
410	01JH-42a 2.5NM 75 non-damaged area	6.55815	0.345131	-1.97619	4.569	0.239	2.03491	1.19567	1.7019	06:05:00	-1777	86	1	10	-1858188	-190192	0.000966917			0.000455434
411	01JH-42a 2.5NM 69 oscillatory core Cs-res 129	6.75454	0.345131	-1.97619	4.765	0.268	2.43926	1.42371	1.71331	06:12:00	-1808	472	2	11	-1858188	-190192	0.000738884			0.0002274
412	01JH-42a 2.5NM 69 non-oscillatory rim	6.79562	0.345131	-1.97619	4.806	0.26	2.53692	1.50632	1.68418	06:15:00	-1705	499	3	12	-1858188	-190192	0.000637754			0.000126271
413	01JH-42a 2.5NM Un 1 oscillatory mantle	7.05614	0.345131	-1.97619	5.066	0.217	2.69476	1.58197	1.70342	06:19:00	-1239	863	1	13	-1858188	-190192	0.000630938			0.000119454
414	01JH-42a 2.5NM Un 1 wavy intrusion into oscillatory	6.71246	0.345131	-1.97619	4.723	0.27	2.82406	1.66099	1.70023	06:23:00	-1226	688	1	12	-1858188	-190192	0.000610814			9.933e-05	Irregular Texture/Zoning: Alteration Suspected
415	01JH-42a 2.5NM Un 1 CL darker core	6.92387	0.345131	-1.97619	4.934	0.21	2.94977	1.73891	1.69634	06:26:00	-1218	816	1	13	-1858188	-190192	0.000644846			0.000133362
416	01JH-42a 2.5NM Un 3 darker CL core Cs-Res 128	6.50805	0.345131	-1.97619	4.519	0.261	3.05638	1.81463	1.68429	06:33:00	-1658	2155	4	17	-1858188	-190192	0.000621709			0.000110225
417	01JH-42a 2.5NM Un 3 oscillatory rim	6.39683	0.345131	-1.97619	4.408	0.301	3.15797	1.87026	1.68852	06:36:00	-1615	2143	4	16	-1858188	-190192	0.000663953			0.000152469
sample: 01JH-54b
418	01JH-54b KIM-5				3.051	0.268	2.89017	1.81667	1.59092	06:52:00	-476	6205	-8	50	-1858188	-190192	0.000455529
419	01JH-54b KIM-5				2.858	0.233	2.74325	1.72768	1.58782	06:56:00	-458	6242	-11	52	-1858188	-190192	0.00045201
420	01JH-54b KIM-5				3.169	0.297	2.67719	1.64045	1.63198	06:59:00	-526	6262	-11	50	-1858188	-190192	0.000471581
421	01JH-54b KIM-5				3.155	0.258	2.50773	1.57732	1.58987	07:03:00	-429	6225	-11	51	-1858188	-190192	0.000470614
	average and 2SD	5.09		-2.02146	3.05825	0.287005											0.000462433
	bracket average and 2SD	5.09		-1.97619	3.10375	0.345131											0.000511484
422	01JH-54b 5M 3-1 dark core	6.71585	0.260353	-1.98154	4.721	0.225	2.58832	1.53707	1.68394	07:07:00	-1615	4548	11	12	-1858188	-190192	0.00128638			0.00080084
424	01JH-54b 5M 3-1 oscillatory mantle	6.76094	0.260353	-1.98154	4.766	0.279	2.49006	1.48845	1.67293	07:14:00	-1550	4501	11	11	-1858188	-190192	0.000599037			0.0001135
425	01JH-54b 5M 3-1 wavy intruding rim	6.77997	0.260353	-1.98154	4.785	0.27	2.44508	1.47131	1.66183	07:18:00	-1503	4480	11	12	-1858188	-190192	0.000503219			1.76823e-05	Irregular Texture/Zoning: Alteration Suspected
426	01JH-54b 5M 3-2 oscillatory core (fracture)			-1.98154	4.724	0.269	2.40834	1.42727	1.68738	07:21:00	-2864	4424	36	-2	-1858188	-190192	0.00501061
427	01JH-54b 5M 3-2 oscillatory darker rim	7.07556	0.260353	-1.98154	5.08	0.232	2.36833	1.39966	1.69208	07:25:00	-2914	4421	37	-2	-1858188	-190192	0.00116622			0.000680685
429	01JH-54b 5M 6-2 CL dark core	7.05452	0.260353	-1.98154	5.059	0.305	2.2949	1.35084	1.69887	07:32:00	-2424	3633	35	-11	-1858188	-190192	0.000651985			0.000166448	Irregular Texture/Zoning: Alteration Suspected
430	01JH-54b 5M 6-2 CL oscillatory rim	6.94731	0.260353	-1.98154	4.952	0.272	2.25587	1.33394	1.69113	07:35:00	-2441	3686	35	-10	-1858188	-190192	0.00059628			0.000110743
433	01JH-54b 5M 6-2 another oscillatory spot, Cs-res = 128	7.17776	0.260353	-1.98154	5.182	0.199	2.35122	1.3754	1.70948	07:50:00	-2383	3625	35	-11	-1858188	-190192	0.000873705			0.000388168	Irregular Texture/Zoning: Alteration Suspected
434	01JH-54b KIM-5				3.133	0.155	2.25913	1.41002	1.6022	07:54:00	-402	6285	-12	53	-1858188	-190192	0.000490438
435	01JH-54b KIM-5				3.013	0.238	2.25496	1.41518	1.5934	07:58:00	-421	6303	-12	52	-1858188	-190192	0.000486668
436	01JH-54b KIM-5				3.105	0.258	2.24234	1.4162	1.58335	08:01:00	-400	6310	-12	53	-1858188	-190192	0.000489581
437	01JH-54b KIM-5				3.303	0.266	2.25455	1.4182	1.58973	08:04:00	-384	6302	-13	54	-1858188	-190192	0.000567876
	average and 2SD	5.09		-1.94162	3.1385	0.24211											0.000508641
	bracket average and 2SD	5.09		-1.98154	3.09837	0.260353											0.000485537	14.9845

## Sheet: Appendix C - U-Pb
American Mineralogist: October 2024 Online Materials AM-24-109180 (use tabs to navigate to other tables)
Cameron et al.: Igneous Hadean zircon
Appendix C. U-Pb SIMS data for Jack Hills zircon. Values of radiation damage calculated from measured [U] and [Th] and age for selected time periods (see text).
grain-spot	area	U (µg/g)	Th (µg/g)	Th/U	%comm 206Pb	204Pb/206Pb	207Pb*/206Pb*	1σ	208Pb*/232Th	1σ	208Pb*/206Pb*	1σ	206Pb*/238U	1σ	207Pb*/235U	1σ	207Pb*/206Pb* Age (Ma)	1σ (Ma)	% conc.	Ref.	Reference	Notes:	Dcalc (1015 α-decays/mg)	Dcalc (1015 α-decays/mg)	Dcalc (1015 α-decays/mg)	Dcalc (1015 α-decays/mg)	Dcalc (1015 α-decays/mg)	Dcalc (1015 α-decays/mg)
																							(Model 2)		(Model 1)	(Model 2)		(Model 2)
01JH-13a																							txln → 2600 Ma	txln → 1000 Ma	txln → 0 Ma	2600 Ma → 1000 Ma	2600 Ma → 0 Ma	1000 Ma → 0 Ma
2.5NM 2-2-2	rim	63	13	0.2	0.03	2e-05	0.43357	0.00377	0.2169	0.0076	0.0527	0.0014	0.8683	0.0170	51.91	1.11	4030	13	100	1	Cavosie 2005		0.808662	1.32511	1.56127	0.516448	0.752607	0.236159
2.5NM 3-1-2	core	93	50	0.54	0	0	0.41401	0.00248	0.2041	0.0074	0.1294	0.0012	0.8749	0.0307	49.94	1.78	3961	9	102	1	Cavosie 2005		1.15209	1.95599	2.32894	0.803901	1.17685	0.372948
2.5NM 3-6-2	core	122	38	0.31	0.05	3e-05	0.42667	0.00126	0.2239	0.0084	0.0790	0.0010	0.8992	0.0316	52.90	1.87	4006	4	103	1	Cavosie 2005		1.54552	2.56291	3.03036	1.01739	1.48484	0.467453
2.5NM 4-4-2	core	116	77	0.67	0	0	0.43673	0.00129	0.2371	0.0088	0.1746	0.0009	0.9334	0.0342	56.20	2.07	4041	4	105	1	Cavosie 2005		1.57462	2.59706	3.0738	1.02244	1.49918	0.476741
2.5NM 5-3-2	core	157	137	0.87	0.11	7e-05	0.44629	0.00117	0.1523	0.0054	0.1741	0.0008	0.7886	0.0275	48.52	1.70	4073	4	92	1	Cavosie 2005		2.24188	3.66988	4.34102	1.42801	2.09914	0.671137
2.5NM 6-2-2	core	63	33	0.52	0	0	0.43641	0.00272	0.2385	0.0091	0.1343	0.0011	0.9263	0.0338	55.74	2.06	4040	9	105	1	Cavosie 2005		0.842819	1.38622	1.63818	0.543404	0.795359	0.251955
2.5NM 6-3-2	core	64	28	0.45	0.04	3e-05	0.46553	0.00227	0.2339	0.0086	0.1149	0.0011	0.9388	0.0333	60.26	2.16	4136	7	103	1	Cavosie 2005		0.93087	1.47545	1.72705	0.544584	0.796176	0.251591
2.5NM 8-2-2		77	38	0.49	0.12	8e-05	0.44995	0.00229	0.2118	0.0031	0.1267	0.0012	0.8530	0.0085	52.92	0.59	4085	8	97	1	Cavosie 2005		1.07274	1.73375	2.03985	0.661016	0.967117	0.306102
2.5NM 9-1-2	core	143	45	0.32	0.04	3e-05	0.32718	0.00127	0.1870	0.0025	0.0844	0.0007	0.7277	0.0054	32.83	0.27	3604	6	98	1	Cavosie 2005		1.16378	2.35691	2.90519	1.19313	1.74141	0.548279
2.5NM 9-1-3	rim	108	95	0.88	0.16	0.0001	0.29800	0.00144	0.1847	0.0022	0.2371	0.0018	0.7054	0.0059	28.98	0.28	3460	7	99	1	Cavosie 2005		0.774218	1.75756	2.21984	0.983344	1.44562	0.462273
2.5NM 9-1-4	core	92	27	0.29	0	0	0.32157	0.00149	0.2059	0.0077	0.0783	0.0008	0.7736	0.0273	34.30	1.22	3577	7	103	1	Cavosie 2005		0.722071	1.48705	1.83825	0.764981	1.11618	0.351198
2.5NM 9-1-5	rim	101	82	0.82	0	0	0.29990	0.00134	0.1983	0.0071	0.2254	0.0012	U.7434	0.0261	30.74	1.09	3470	7	103	1	Cavosie 2005		0.728757	1.63914	2.06605	0.910387	1.33729	0.426906
2.5M 1-3-2	core	51	29	0.57	0.14	9e-05	0.46262	0.00299	0.2161	0.0040	0.1482	0.0018	0.8665	0.0104	55.27	0.75	4126	10	98	1	Cavosie 2005		0.744102	1.18708	1.39285	0.442979	0.648748	0.205769
2.5M 2-1-2	core	98	46	0.47	0.08	5e-05	0.42949	0 00333	0.2093	0.0029	0.1216	0.0010	0.8332	0.0072	49.34	0.57	4016	12	97	1	Cavosie 2005		1.46096	2.29906	2.68678	0.838107	1.22582	0.387717
2.5M 2-1-3	core	68	29	0.42	0	0	0.47291	0.00353	0.2242	0.0034	0.1105	0.0012	0.8773	0.0096	57.20	0.76	4159	11	98	1	Cavosie 2005		1.00958	1.58719	1.85391	0.57761	0.844333	0.266723
2.5M 3-3-2	core	28	26	0.93	0.46	0.00029	0 45571	0.00390	0.2185	0.0056	0.2342	0.0032	0.9029	0.0152	56.73	1.07	4104	13	101	1	Cavosie 2005		0.413896	0.670684	0.791615	0.256788	0.377719	0.120931
2.5M 3-4-2	core	80	51	0.63	0.08	5e-05	0.43764	0.00193	0.2303	0.0083	0.1645	0.0010	0.9160	0.0323	55.28	1.97	4044	7	104	1	Cavosie 2005		1.08635	1.78865	2.11577	0.702296	1.02942	0.327126
2.5M 5-1-2	core	47	24	0.51	0.18	0.00012	0.41810	0.00250	0.2094	0.0055	0.1321	0.0015	0.8322	0.0103	47.97	0.66	3976	9	98	1	Cavosie 2005		0.589489	0.994051	1.18153	0.404562	0.59204	0.187477
2.5M 5-5-2	core	98	59	0.6	0	0	0.43092	0.00290	0.2279	0.0082	0.1552	0.0011	0.9110	0.0320	54.13	1.94	4021	10	104	1	Cavosie 2005		1.29679	2.15242	2.55041	0.855628	1.25361	0.397984
2.5M 6-3-2		75	20	0.27	0.16	0.0001	0.40170	0.00761	0.1986	0.0046	0.0697	0.0009	0.8110	0.0080	44.92	0.96	3915	28	98	1	Cavosie 2005		0.86242	1.48334	1.76805	0.620916	0.90563	0.284714
2.5M 6-6-2	core	42	61	1.45	0.16	0.0001	0.35917	0.00202	0.2068	0.0076	0.3752	0.0025	0.8255	0.0297	40.88	1.49	3746	9	104	1	Cavosie 2005		0.453752	0.868586	1.06736	0.414834	0.613606	0.198771
2.5M 7-2-2	core	80	35	0.44	0.13	8e-05	0.44200	0.00276	0.2207	0.0036	0.1132	0.0012	0.8811	0.0087	53.70	0.63	4058	9	100	1	Cavosie 2005		1.07997	1.7607	2.07519	0.68073	0.99522	0.314489
2.5M 7-6-2	core	65	28	0.42	0.04	3e-05	0.40341	0.00231	0.2214	0.0082	0.1115	0.0010	0.8704	0.0309	48.41	1.74	3922	9	103	1	Cavosie 2005		0.765626	1.31813	1.57331	0.552504	0.807681	0.255177
2.5M 10-1-2		48	16	0.34	0.15	9e-05	0.44561	0.00350	0.2165	0.0042	0.0879	0.0011	0.8751	0.0106	53.76	0.78	4071	12	100	1	Cavosie 2005		0.649501	1.0512	1.23595	0.401699	0.586444	0.184745
2.5M 10-2-2	core	57	42	0.74	0.14	9e-05	0.42783	0.00228	0.2176	0.0033	0.1978	0.0018	0.8433	0.0095	49.74	0.62	4010	8	98	1	Cavosie 2005		0.755983	1.264	1.50155	0.508018	0.745567	0.237549
2.5M 10-3-2	core	69	42	0.61	0.06	4e-05	0.46791	0.00181	0.2313	0.0085	0.1593	0.0011	0.9175	0.0326	59.19	2.11	4143	6	101	1	Cavosie 2005		1.02683	1.62988	1.91045	0.603051	0.883627	0.280576
5M 3-2-2	core	148	113	0.77	0.04	2e-05	0.41288	0.00121	0.2134	0.0078	0.1990	0.0015	0.8498	0.0304	48.37	1.74	3957	4	100	1	Cavosie 2005		1.86717	3.19155	3.81146	1.32438	1.9443	0.619912
5M 3-2-3	rim	62	33	0.53	0.11	7e-05	0.43730	0.00171	0.2210	0.0081	0.1352	0.0010	0.8983	0.0318	54.16	1.93	4043	6	102	1	Cavosie 2005		0.832554	1.36804	1.61641	0.535485	0.783854	0.248369
5M 7-1-2	core	28	13	0.46	0	0	0.38109	0.00432	0.2253	0.0095	0.1261	0.0016	0.8486	0.0338	44.59	1.84	3836	17	103	1	Cavosie 2005	Irregular Texture: Possible Alteration	0.30239	0.541657	0.65232	0.239267	0.34993	0.110664
10M 3-2-2	core	65	47	0.72	0.03	2e-05	0.44979	0.00226	0.2290	0.0085	0.1877	0.0021	0.9055	0.0321	56.16	2.01	4085	7	102	1	Cavosie 2005		0.925703	1.50382	1.774	0.578112	0.848295	0.270183
10M 4-1-2	core	79	34	0.44	0.05	3e-05	0.45262	0.00245	0.2352	0.0088	0.1145	0.0013	0.9297	0.0328	58.02	2.07	4094	8	104	1	Cavosie 2005		1.10335	1.77481	2.08492	0.671463	0.981577	0.310114
10M 4-1-3	core	80	38	0.47	0.04	3e-05	0.44464	0.00167	0.2311	0.0087	0.1225	0.0011	0.9225	0.0335	56.56	2.07	4067	6	104	1	Cavosie 2005		1.12216	1.80694	2.12379	0.684774	1.00163	0.316858
10M 6-1-2	core	51	12	0.23	0	0	0.46499	0.00472	0.2351	0.0090	0.0588	0.0007	0.9415	0.0339	60.36	2.26	4134	15	103	1	Cavosie 2005		0.72599	1.14606	1.3384	0.420066	0.612408	0.192342
10M 9-2-2	core	51	28	0.54	0.04	3e-05	0.37589	0.00286	0.2157	0.0080	0.1456	0.0013	0.8337	0.0298	43.21	1.58	3815	12	102	1	Cavosie 2005		0.543197	0.984829	1.18981	0.441631	0.64661	0.204979
10M 11-1-2	core	99	95	0.96	0.31	0.00019	0.40142	0.00383	0.1608	0.0060	0.1977	0.0018	0.8093	0.0286	44.79	1.64	3914	14	98	1	Cavosie 2005	Irregular Texture: Possible Alteration	1.21882	2.13089	2.56089	0.912069	1.34207	0.430002
01JH-13b
2.5NM 1-1-2	core	104	35	0.33	0.04	3e-05	0.44818	0.00443	0.2228	0.0027	0.0848	0.0005	0.9093	0.0078	56.19	0.74	4079	15	102	1	Cavosie 2005		1.41862	2.28942	2.68996	0.870797	1.27134	0.400543
2.5NM 1-2-2	core	85	39	0.46	0	0	0.43553	0.00128	0.2243	0.0025	0.1209	0.0008	0.8810	0.0079	52.91	0.50	4037	4	101	1	Cavosie 2005		1.12661	1.85233	2.1879	0.725719	1.0613	0.335576
2.5NM 2-1-2	core	52	18	0.34	0.21	0.00013	0.41527	0.00163	0.2083	0.0043	0.0852	0.0008	0.8597	0.0089	49.22	0.54	3965	6	101	1	Cavosie 2005		0.634458	1.07053	1.2712	0.436073	0.636739	0.200666
2.5NM 3-1-2	core	86	55	0.63	0	0	0.45908	0.00286	0.2305	0.0032	0.1677	0.0018	0.8962	0.0080	56.73	0.62	4115	9	100	1	Cavosie 2005		1.2502	2.0054	2.3572	0.755204	1.107	0.351798
2.5NM 4-2-2	core	45	19	0.42	0.08	5e-05	0.37330	0.00462	0.2046	0.0033	0.1120	0.0010	0.7921	0.0085	40.77	0.67	3805	19	99	1	Cavosie 2005		0.467913	0.849897	1.02625	0.381984	0.558341	0.176357
2.5NM 6-4-2	core	82	51	0.62	0.09	5e-05	0.42883	0.00130	0.2180	0.0025	0.1623	0.0011	0.8588	0.0079	50.78	0.49	4013	5	100	1	Cavosie 2005		1.07868	1.79681	2.13111	0.718134	1.05243	0.334297
2.5NM 7-1-2	rim	39	15	0.38	0.15	9e-05	0.46091	0.00218	0.2197	0.0047	0.0991	0.0011	0.8840	0.0125	56.18	0.84	4121	7	99	1	Cavosie 2005		0.556408	0.885485	1.03717	0.329076	0.480761	0.151685
2.5NM 7-2-2	core	98	30	0.3	0.09	6e-05	0.33162	0.00136	0.1980	0.0032	0.0806	0.0006	0.7702	0.0089	35.22	0.43	3625	6	102	1	Cavosie 2005		0.817703	1.63424	2.00932	0.816542	1.19162	0.375081
2.5NM 7-5-2	core	45	32	0.71	0.05	3e-05	0.42832	0.00202	0.2240	0.0033	0.1906	0.0016	0.8664	0.0094	51.17	0.61	4012	7	100	1	Cavosie 2005		0.596517	0.996023	1.18265	0.399506	0.58613	0.186624
2.5NM 8-1-2	core	142	58	0.41	0.06	4e-05	0.46462	0.00232	0.2126	0.0023	0.0977	0.0005	0.9210	0.0074	59.00	0.56	4133	7	102	1	Cavosie 2005		2.05378	3.25651	3.81147	1.20274	1.7577	0.55496
2.5NM 11-1-2	core	104	78	0.75	0.03	2e-05	0.45394	0.00146	0.2306	0.0024	0.1940	0.0011	0.9175	0.0079	57.42	0.53	4098	5	102	1	Cavosie 2005		1.50336	2.43211	2.86662	0.928754	1.36326	0.434504
2.5NM 12-1-2	core	59	50	0.85	0.04	3e-05	0.35566	0.00145	0.2015	0.0025	0.2264	0.0014	0.7825	0.0080	38.37	0.42	3731	6	100	1	Cavosie 2005		0.590505	1.12514	1.37618	0.534639	0.785678	0.251039
2.5NM 16-2-2	core	72	34	0.47	0.03	2e-05	0.43502	0.00289	0.2216	0.0031	0.1206	0.0008	0.8860	0.0107	53.14	0.73	4035	10	101	1	Cavosie 2005		0.953694	1.56972	1.85474	0.616027	0.901042	0.285015
2.5NM 17-1-2	core	80	51	0.63	0.1	6e-05	0.42775	0.00129	0.2245	0.0026	0.1672	0.0009	0.8800	0.0080	51.90	0.50	4010	5	102	1	Cavosie 2005		1.05086	1.75316	2.08028	0.702296	1.02942	0.327126
2.5NM 18-1-2	core	25	16	0.64	0.2	0.00013	0.40416	0.00235	0.1514	0.0042	0.1225	0.0014	0.8227	0.0108	45.85	0.66	3925	9	99	1	Cavosie 2005		0.301656	0.521208	0.623484	0.219552	0.321828	0.102276
2.5NM 18-3-2	core	55	55	0.98	0.24	0.00015	0.46265	0.00270	0.0987	0.0018	0.1134	0.0009	0.8893	0.0092	56.73	0.67	4126	9	99	1	Cavosie 2005		0.835413	1.34511	1.58576	0.5097	0.750346	0.240645
2.5NM 19-1-2	core	34	16	0.47	0	0	0.44426	0.00654	0.2269	0.0067	0.1228	0.0033	0.8850	0.0103	54.21	1.02	4066	22	101	1	Cavosie 2005		0.464057	0.754884	0.88943	0.290827	0.425373	0.134546
2.5NM 19-2-2	core	71	84	1.19	0.03	2e-05	0.42799	0.00142	0.2241	0.0024	0.3172	0.0015	0.8714	0.0084	51.42	0.52	4010	5	101	1	Cavosie 2005		0.982203	1.6577	1.97862	0.675498	0.996417	0.320918
2.5NM 19-4-2	core	143	90	0.63	0	0	0.45154	0.00102	0.2218	0.0020	0.1623	0.0007	0.8826	0.0072	54.95	0.47	4090	3	100	1	Cavosie 2005		2.02811	3.2819	3.86572	1.25379	1.83761	0.583819
2.5NM 20-2-2	core	30	6	0.2	0	0	0.39111	0.00349	0.2200	0.0052	0.0549	0.0008	0.8147	0.0103	43.93	0.68	3875	13	99	1	Cavosie 2005		0.328535	0.574206	0.686512	0.245671	0.357977	0.112306
2.5NM 20-3-2	core	41	19	0.45	0.1	6e-05	0.44935	0.00368	0.2260	0.0040	0.1183	0.0011	0.8964	0.0103	55.54	0.78	4083	12	101	1	Cavosie 2005		0.568439	0.918746	1.08076	0.350306	0.512321	0.162015
2.5NM 22-6-2	core	30	12	0.4	0	0	0.45922	0.00240	0.2404	0.0050	0.1073	0.0012	0.9053	0.0134	57.32	0.90	4115	8	101	1	Cavosie 2005		0.42621	0.679967	0.797012	0.253758	0.370803	0.117045
2.5NM 23-2-2	core	120	18	0.15	0.04	3e-05	0.44241	0.00104	0.2264	0.0035	0.0393	0.0003	0.8944	0.0073	54.56	0.47	4060	4	101	1	Cavosie 2005		1.57734	2.55193	2.99642	0.974596	1.41908	0.444486
2.5NM 24-1-2	core	26	13	0.5	0.11	7e-05	0.44303	0.00470	0.2123	0.0046	0.1284	0.0016	0.8603	0.0112	52.55	0.88	4062	16	99	1	Cavosie 2005		0.354513	0.577941	0.681433	0.223428	0.32692	0.103492
2.5NM 24-2-2	core	49	14	0.29	0.04	3e-05	0.43032	0.00461	0.2110	0.0100	0.0736	0.0032	0.8513	0.0095	50.51	0.78	4019	16	99	1	Cavosie 2005	Irregular Texture: Possible Alteration	0.627163	1.03409	1.22084	0.406923	0.593674	0.186751
2.5NM 24-4-2	core	37	25	0.67	0.11	7e-05	0.38353	0.00207	0.2081	0.0037	0.1758	0.0016	0.8185	0.0117	43.28	0.66	3846	8	100	1	Cavosie 2005		0.412689	0.739404	0.891815	0.326715	0.479127	0.152411
2.5NM 24-7-2	core	59	34	0.57	0.09	6e-05	0.40575	0.00235	0.2124	0.0033	0.1486	0.0011	0.8459	0.0106	47.33	0.66	3931	9	101	1	Cavosie 2005		0.711746	1.22482	1.46322	0.513074	0.751476	0.238402
2.5NM 25-5-2	core	77	41	0.53	0.01	0	0.43469	0.00143	0.2200	0.0033	0.1399	0.0012	0.8575	0.0103	51.40	0.64	4034	5	99	1	Cavosie 2005		1.02497	1.69003	1.9985	0.665059	0.97353	0.308471
2.5NM 25-7-2	core	20	8	0.39	0	0	0.40477	0.00438	0.2098	0.0047	0.1032	0.0015	0.8137	0.0138	45.41	0.91	3927	16	98	1	Cavosie 2005		0.23605	0.405222	0.483252	0.169172	0.247202	0.0780299
2.5NM 25-8-2	core	93	69	0.75	0.03	2e-05	0.37730	0.00148	0.2042	0.0029	0.1975	0.0010	0.7966	0.0102	41.44	0.56	3821	6	99	1	Cavosie 2005		1.01676	1.84627	2.23422	0.829509	1.21746	0.387954
2.5M 1-3-2	core	45	16	0.36	0.16	0.0001	0.44507	0.00191	0.2117	0.0049	0.0890	0.0009	0.8846	0.0119	54.29	0.76	4069	6	100	1	Cavosie 2005		0.609065	0.987005	1.16099	0.377941	0.551929	0.173988
2.5M 2-1-2	core	57	21	0.36	0.21	0.00013	0.46228	0.00917	0.2222	0.0074	0.0941	0.0022	0.8954	0.0104	57.07	1.31	4125	29	100	1	Cavosie 2005		0.815022	1.29474	1.5157	0.479713	0.700677	0.220964
2.5M 2-1-3	core	87	23	0.27	0.08	5e-05	0.43009	0.00819	0.2214	0.0036	0.0707	0.0008	0.8724	0.0084	51.74	1.10	4018	28	101	1	Cavosie 2005		1.23142	1.95141	2.28152	0.719993	1.0501	0.330111
2.5M 5-2-2	core	26	14	0.53	0.12	8e-05	0.42983	0.00290	0.2230	0.0046	0.1407	0.0015	0.8649	0.0133	51.26	0.86	4017	10	100	1	Cavosie 2005		0.340574	0.56535	0.669632	0.224775	0.329058	0.104282
2.5M 5-3-2	core	72	15	0.21	0.02	1e-05	0.42396	0.00702	0.2211	0.0053	0.0568	0.0007	0.8511	0.0145	49.75	1.18	3996	25	99	1	Cavosie 2005		0.893669	1.48409	1.7541	0.590418	0.860427	0.270009
2.5M 6-3-2	core	164	63	0.38	0.04	3e-05	0 45122	0.00163	0.2251	0.0027	0.1014	0.0005	0.8842	0.0095	55.01	0.63	4089	5	100	1	Cavosie 2005		2.26928	3.65298	4.29077	1.3837	2.0215	0.637792
2.5M 8-4-2	core	157	17	0.11	0.14	9e-05	0.42695	0.00641	0.1689	0.0065	0.0237	0 0004	0.8323	0.0059	49.00	0.81	4007	22	97	1	Cavosie 2005		1.95015	3.21642	3.79278	1.26627	1.84263	0.576363
2.5M 10-3-2	core	111	61	0.55	0.1	6e-05	0.45317	0.00136	0.2200	0.0029	0.1417	0.0007	0.8818	0.0100	55.10	0.65	4096	4	100	1	Cavosie 2005		1.57124	2.53251	2.97869	0.961277	1.40745	0.446177
2.5M 10-4-2	core	162	141	0.87	0.03	2e-05	0.36048	0.00093	0.2061	0.0024	0.2324	0.0009	0.7959	0.0087	39.56	0.44	3752	4	101	1	Cavosie 2005		1.66388	3.13688	3.8291	1.47299	2.16522	0.692224
2.5M 13-2-2	core	112	87	0.78	0.08	5e-05	0.44883	0.00341	0.2216	0.0027	0.2032	0.0009	0.8765	0.0099	54.24	0.74	4081	11	99	1	Cavosie 2005		1.59708	2.60132	3.07162	1.00424	1.47454	0.470297
2.5M 16-1-2	core	171	63	0.36	0.08	5e-05	0.44080	0.00124	0.1184	0.0022	0.0520	0.0004	0.8608	0.0106	52.32	0.66	4054	4	99	1	Cavosie 2005		2.28389	3.72303	4.38593	1.43914	2.10203	0.662891
2.5M 18-1-2	core	42	24	0.57	0.06	4e-05	0.43390	0.00328	0.2075	0.0039	0.1449	0.0018	0.8491	0.0117	50.80	0.80	4031	11	98	1	Cavosie 2005		0.607193	0.972158	1.14171	0.364965	0.534514	0.169549
2.5M 18-1-3	core	41	22	0.53	0.23	0.00014	0.45951	0.00323	0.2132	0.0045	0.1335	0.0017	0.8770	0.0122	55.56	0.87	4116	10	99	1	Cavosie 2005		0.590765	0.945115	1.1095	0.35435	0.518734	0.164384
2.5M 19-3-2	core	120	19	0.16	0.06	4e-05	0.48186	0.00124	0.2264	0.0041	0.0419	0.0004	0.9095	0.0102	60.42	0.70	4187	4	100	1	Cavosie 2005		1.78214	2.75809	3.20336	0.975944	1.42122	0.445276
2.5M 24-1-2	core	174	16	0.09	0.09	6e-05	0.52007	0.00536	0.2291	0.0061	0.0232	0.0003	0.9535	0.0064	68.38	0.84	4299	15	100	1	Cavosie 2005		2.84627	4.24582	4.88235	1.39955	2.03608	0.636528
2.5M 24-1-3	core	212	27	0.13	0.07	5e-05	0.48883	0.00481	0.1820	0.0075	0.0267	0.0008	0.8990	0.0094	60.60	0.87	4208	15	98	1	Cavosie 2005		3.47952	5.19484	5.97631	1.71532	2.49678	0.781468
2.5M 25-3-2	core	52	28	0.54	0.02	1e-05	0.47133	0.00356	0.2296	0.0036	0.1370	0.0011	0.9338	0.0121	60.69	0.91	4154	11	102	1	Cavosie 2005		0.776667	1.22622	1.43478	0.449551	0.658115	0.208564
5M 2-1-2	core	39	32	0.83	0.38	0.00024	0.50859	0.00240	0.1402	0.0032	0.1445	0.0014	0.8361	0.0119	58.63	0.88	4266	7	92	1	Cavosie 2005		0.662312	1.0143	1.17941	0.351989	0.5171	0.165111
5M 2-1-3	core	36	72	2.01	0.92	0.00057	0.41427	0.00425	0.0292	0.0014	0.0971	0.0013	0.6343	0.0095	36.23	0.66	3962	15	80	1	Cavosie 2005	Irregular Texture: Possible Alteration; Concordance <85%	0.675972	1.05812	1.24406	0.382144	0.568089	0.185946
5M 4-2-2	core	256	227	0.89	0.2	0.00013	0.39861	0.00078	0.1435	0.0017	0.1727	0.0006	0.7626	0.0080	41.91	0.44	3904	3	94	1	Cavosie 2005		3.09764	5.43097	6.52817	2.33334	3.43053	1.09719
5M 4-2-3	rim	123	23	0.19	0.08	5e-05	0.32403	0.00101	0.0248	0.0030	0.0068	0.0001	0.7399	0.0083	33.06	0.38	3589	5	99	1	Cavosie 2005		0.968482	1.97358	2.43277	1.00509	1.46429	0.459192
5M 6-2-2	core	126	64	0.5	0.05	3e-05	0.49604	0.00124	0.2206	0.0033	0.1282	0.0012	0.8974	0.0101	61.38	0.71	4229	4	98	1	Cavosie 2005		2.01112	3.09524	3.59757	1.08411	1.58644	0.50233
5M 6-2-3	rim	162	484	2.99	2.07	0.0013	0.41618	0.00275	0.0165	0.0007	0.1347	0.0012	0.3821	0.0050	21.92	0.32	3969	10	53	1	Cavosie 2005	Irregular Texture: Possible Alteration; Concordance <85%	2.51564	4.45094	5.41406	1.9353	2.89842	0.963121
5M 9-1-2	core	110	100	0.9	0.17	0.0001	0.33555	0.00164	0.1326	0.0018	0.1870	0.0010	0.6625	0.0075	30.65	0.38	3643	7	90	1	Cavosie 2005		1.00035	2.00627	2.47966	1.00592	1.47932	0.473393
5M 10-2-2	core	170	184	1.08	0.05	3e-05	0.50811	0.00147	0.2222	0.0029	0.2627	0.0018	0.9465	0.0102	66.31	0.74	4265	4	101	1	Cavosie 2005		2.9521	4.54641	5.30128	1.59431	2.34918	0.75487
5M 10-2-3	rim	275	144	0.52	0.2	0.00013	0.45103	0.00194	0.0481	0.0012	0.0334	0.0004	0.7873	0.0082	48.96	0.55	4089	6	92	1	Cavosie 2005		3.85713	6.22906	7.32883	2.37194	3.4717	1.09976
5M 10-4-2	core	23	5	0.21	0.04	3e-05	0.33306	0.00228	0.1981	0.0061	0.0561	0.0010	0.7598	0.0123	34.89	0.61	3631	10	100	1	Cavosie 2005		0.19143	0.380317	0.466734	0.188887	0.275304	0.0864173
5M 12-2-2	core	129	121	0.94	0.04	2e-05	0.28578	0.00089	0.1788	0.0022	0.2504	0.0014	0.6928	0.0077	27.30	0.31	3395	5	100	1	Cavosie 2005		0.848102	2.0328	2.5909	1.1847	1.7428	0.558104
5M 12-4-2	core	77	78	1.02	0.83	0.00052	0.44879	0.00206	0.1066	0.0026	0.1484	0.0016	0.7639	0.0093	47.27	0.62	4081	7	90	1	Cavosie 2005		1.12248	1.83741	2.1751	0.714928	1.05262	0.337693
5M 13-2-2	core	64	36	0.56	0.25	0.00015	0.35715	0.00158	0.2011	0.0033	0.1470	0.0010	0.7997	0.0098	39.38	0.51	3738	7	101	1	Cavosie 2005		0.626912	1.18228	1.44019	0.555367	0.813276	0.25791
5M 13-2-4	core	85	46	0.54	0.01	0	0.35569	0.00429	0.2020	0.0030	0.1410	0.0011	0.7944	0.0093	38.96	0.66	3732	18	101	1	Cavosie 2005		0.830759	1.56591	1.90702	0.735154	1.07626	0.341105
5M 14-1-2	core	78	20	0.26	5.82	0.00363	0.44369	0.00853	0.1612	0.0620	0.0681	0.0065	0.8298	0.0118	50.76	1.21	4064	29	96	1	Cavosie 2005		1.04032	1.685	1.98047	0.644674	0.940145	0.295471
5M 14-1-3	core	147	31	0.21	0.06	4e-05	0.44480	0.00335	0.2042	0.0036	0.0510	0.0005	0.8767	0.0096	53.77	0.71	4068	11	100	1	Cavosie 2005		1.95931	3.16526	3.71682	1.20594	1.75751	0.551564
5M 14-4-2	core	295	112	0.38	0.1	6e-05	0.43212	0.00127	0.0891	0.0013	0.0424	0.0002	0.8265	0.0085	49.25	0.53	4025	4	97	1	Cavosie 2005		3.86433	6.35153	7.49773	2.4872	3.6334	1.1462
5M 14-4-3	core	318	196	0.62	0.74	0.00047	0.43464	0.00136	0.0456	0.0024	0.0375	0.0003	0.8202	0.0085	49.15	0.53	4033	5	96	1	Cavosie 2005	Irregular Texture: Possible Alteration	4.26355	7.04611	8.34113	2.78256	4.07757	1.29501
5M 20-1-2	core	201	75	0.37	0.14	9e-05	0.46486	0.00165	0.0646	0.0024	0.0311	0.0009	0.8120	0.0086	52.04	0.58	4133	5	93	1	Cavosie 2005		2.8972	4.5901	5.37003	1.6929	2.47283	0.779936
5M 22-1-3	core	138	70	0.51	0.01	0	0.45857	0.00117	0.2301	0.0028	0.1355	0 0006	0.8948	0.0098	56.58	0.64	4113	4	100	1	Cavosie 2005		1.97721	3.16444	3.71454	1.18723	1.73733	0.550095
5M 22-1-4	core	176	62	0.35	0.05	3e-05	0.42565	0.00148	0.1963	0.0059	0.0858	0.0024	0.8362	0.0091	49.08	0.56	4002	5	98	1	Cavosie 2005		2.48412	3.96151	4.64154	1.47739	2.15742	0.680029
5M 22-2-2	core	84	53	0.63	0.09	5e-05	0.46308	0.00235	0.2303	0.0032	0.1660	0.0011	0.9057	0.0107	57.83	0.74	4128	8	101	1	Cavosie 2005		1.23517	1.97184	2.31489	0.736669	1.07972	0.343048
5M 22-4-2	core	50	39	0.77	0.21	0.00013	0.35838	0.00166	0.2012	0.0033	0.1995	0.0014	0.8059	0.0106	39.82	0.56	3743	7	102	1	Cavosie 2005		0.503752	0.95229	1.16237	0.448538	0.658619	0.210081
01JH-36
5-2	core	61	40	0.66	0.16	8e-05	0.33757	0.00164	0.1942	0.0068	0.1824	0.0014	0.7334	0.0248	34.14	1.16	3652	7	97	2	Cavosie et al 2004		0.546093	1.08309	1.33341	0.537	0.787312	0.250312
56-2	core	172	101	0.61	0.04	2e-05	0.32336	0.00095	0.1676	0.0056	0.1456	0.0007	0.7027	0.0233	31.33	1.04	3586	5	96	2	Cavosie et al 2004	Irregular Texture: Possible Alteration	1.41013	2.90841	3.6049	1.49828	2.19477	0.696489
69-1	core	138	91	0.66	0.03	2e-05	0.55074	0.00195	0.2454	0.0027	0.1698	0.0011	0.9803	0.0082	74.44	0.68	4383	5	101	1	Cavosie 2005		2.56184	3.77738	4.34406	1.21554	1.78222	0.566681
69-2	core	136	94	0.69	0.11	7e-05	0.54424	0.00193	0.2421	0.0029	0.1793	0.0014	0.9655	0.0079	72.45	0.65	4366	5	100	1	Cavosie 2005		2.53177	3.73551	4.29739	1.20374	1.76562	0.561879
69-3	core	92	65	0.71	0.15	9e-05	0.54741	0.00232	0.2441	0.0036	0.1828	0.0019	0.9830	0.0097	74.20	0.80	4374	6	101	1	Cavosie 2005		1.71497	2.53117	2.91238	0.816199	1.19741	0.38121
69-4	rim	61	16	0.27	0.44	0.00027	0.28293	0.00236	0.1636	0.0078	0.0646	0.0011	0.7078	0.0090	27.61	0.42	3379	13	102	1	Cavosie 2005		0.368443	0.873095	1.10445	0.504652	0.736009	0.231357
69-5	rim	117	186	1.59	0.97	0.00061	0.28476	0.00221	0.0246	0.0013	0.0759	0.0010	0.5431	0.0049	21.32	0.25	3389	12	83	1	Cavosie 2005	Concordance <85%	0.816174	1.99345	2.55986	1.17727	1.74368	0.566413
69-6	rim	57	43	0.75	0.58	0.00036	0.29252	0.00293	0.0616	0.0032	0.0798	0.0015	0.6073	0.0087	24.49	0.43	3431	16	89	1	Cavosie 2005		0.364056	0.873422	1.11176	0.509365	0.747704	0.238339
69-2	core	132	194	1.47	0.1	5e-05	0.49650	0.00509	0.0592	0.0023	0.1551	0.0026	0.5850	0.0199	40.04	1.42	4231	15	70	2	Cavosie et al 2004	Concordance <85%	2.62514	3.93198	4.5585	1.30685	1.93336	0.626515
69-3	core	95	71	0.75	0.14	7e-05	0.52890	0.00658	0.1014	0.0038	0.1045	0.0015	0.7707	0.0257	56.20	2.00	4324	18	85	2	Cavosie et al 2004		1.77723	2.62528	3.02198	0.848044	1.24475	0.396705
69-4	core	140	335	2.39	0.45	0.00024	0.40980	0.00761	0.0248	0.0011	0.1562	0.0027	0.4149	0.0150	23.44	0.95	3946	28	57	2	Cavosie et al 2004	Concordance <85%	2.99531	4.55556	5.32212	1.56024	2.3268	0.76656
69-5	core	244	473	1.94	1.57	0.00084	0.49680	0.00551	0.0349	0.0023	0.2114	0.0106	0.3854	0.0132	26.40	0.95	4232	16	50	2	Cavosie et al 2004	Concordance <85%	5.03935	7.60922	8.85767	2.56987	3.81832	1.24845
69-6	core	206	423	2.05	0.57	0.0003	0.44950	0.00322	0.0310	0.0012	0.1329	0.0014	0.5391	0.0184	33.41	1.17	4084	11	68	2	Cavosie et al 2004	Concordance <85%	4.29318	6.49472	7.56743	2.20154	3.27425	1.07271
69-7	rim	125	252	2.02	1.2	0.00064	0.27980	0.00354	0.0156	0.0009	0.1350	0.0033	0.2913	0.0099	11.24	0.41	3362	20	49	2	Cavosie et al 2004	Concordance <85%	0.909543	2.23913	2.88635	1.32958	1.97681	0.647224
69-8	core/rim	151	185	1.23	0.23	0.00012	0.48060	0.00496	0.0853	0.0030	0.1761	0.0011	0.6282	0.0214	41.63	1.48	4183	15	75	2	Cavosie et al 2004	Concordance <85%
69-9	core	159	201	1.26	0.36	0.00019	0.51960	0.00503	0.0811	0.0030	0.1704	0.0020	0.6460	0.0215	46.28	1.61	4298	14	75	2	Cavosie et al 2004	Concordance <85%	2.88781	4.41791	5.14677	1.53011	2.25896	0.728855
69-10	core/rim	159	249	1.57	0.4	0.00021	0.34040	0.00169	0.0309	0.0010	0.1194	0.0012	0.4463	0.0119	20.94	0.57	3664	8	65	2	Cavosie et al 2004	Concordance <85%
69-11	core	79	47	0.59	0.24	0.00013	0.52410	0.00321	0.1512	0.0051	0.1384	0.0022	0.7014	0.0191	50.68	1.42	4310	9	80	2	Cavosie et al 2004	Concordance <85%	1.45824	2.14723	2.46761	0.688985	1.00937	0.320381
69-12	core	162	208	1.28	0.19	0.0001	0.52210	0.00296	0.0901	0.0027	0.1870	0.0015	0.6542	0.0187	47.09	1.37	4305	8	75	2	Cavosie et al 2004	Concordance <85%	3.17262	4.73592	5.48106	1.5633	2.30844	0.74514
86-2	unk	378	87	0.23	0.02	1e-05	0.34404	0.00064	0.1903	0.0064	0.0619	0.0003	0.7369	0.0243	34.96	1.15	3681	3	97	2	Cavosie et al 2004		3.3454	6.45621	7.88027	3.11082	4.53488	1.42406
115-1	core	134	37	0.28	0.08	5e-05	0.46356	0.01180	0.2232	0.0054	0.0702	0.0011	0.9072	0.0155	57.99	1.78	4129	38	101	1	Cavosie 2005		1.90608	3.01716	3.52685	1.11108	1.62077	0.50969
115-2	core	176	51	0.29	0.09	5e-05	0.44400	0.00447	0.1919	0.0067	0.0770	0.0006	0.7567	0.0252	46.33	1.61	4065	15	89	2	Cavosie et al 2004		2.50685	3.96942	4.64076	1.46256	2.13391	0.671342
01JH-42
69b	core	176	58	0.33	0	0	0.40308	0.00161	0.1692	0.0020	0.0829	0.0008	0.6918	0.0043	38.45	0.28	3921	6	86	2	Cavosie et al 2004		2.04964	3.52164	4.19851	1.472	2.14887	0.67687
69d	core	306	112	0.37	0	0	0.40830	0.00122	0.1724	0.0014	0.0955	0.0006	0.6842	0.0034	38.52	0.22	3940	4	85	2	Cavosie et al 2004		3.6473	6.22161	7.40726	2.57431	3.75995	1.18564
75b	unk	217	66	0.3	0.13	7e-05	0.41039	0.00246	0.1290	0.0028	0.0771	0.0012	0.5471	0.0047	30.96	0.33	3948	9	71	2	Cavosie et al 2004	Irregular Texture: Possible Alteration; Concordance <85%	2.59126	4.39874	5.22894	1.80748	2.63768	0.830197
01JH-47
b-2-2	unk	218	154	0.71	0.13	7e-05	0.18797	0.00081	0.0565	0.0013	0.0935	0.0006	0.4522	0.0084	11.72	0.22	2724	7	88	2	Cavosie et al 2004	Irregular Texture: Possible Alteration	0.190854	2.12486	3.02814	1.93401	2.83729	0.903284
b-3-2	unk	502	552	1.1	0.2	0.00011	0.16462	0.00060	0.0587	0.0012	0.1558	0.0009	0.4387	0.0080	9.96	0.19	2504	6	94	2	Cavosie et al 2004	Irregular Texture: Possible Alteration	-0.344235	4.37533	6.61125	4.71956	6.95549	2.23592
01JH-54a
10-2	core	123	128	1.04	0	0	0.45952	0.00120	0.2262	0.0023	0.2742	0.0011	0.8839	0.0082	56.00	0.54	4116	4	99	2	Cavosie et al 2004		1.87	3.01661	3.55873	1.14661	1.68873	0.542119
10-3	core	58	55	0.94	0	0	0.45891	0.00180	0.1921	0.0020	0.2215	0.0014	0.8410	0.0070	53.22	0.49	4114	6	96	2	Cavosie et al 2004		0.874361	1.40782	1.65922	0.533459	0.784861	0.251402
10-4	core	85	69	0.82	0	0	0.46153	0.00149	0.2252	0.0021	0.2129	0.0011	0.8895	0.0063	56.61	0.44	4123	5	100	2	Cavosie et al 2004		1.26531	2.03146	2.39073	0.766154	1.12542	0.35927
17-2	core	199	62	0.31	0.02	1e-05	0.47912	0.00199	0.2207	0.0020	0.0804	0.0005	0.8929	0.0042	58.99	0.37	4178	6	98	2	Cavosie et al 2004		2.97445	4.63399	5.39649	1.65954	2.42203	0.762498
17-3	core	392	224	0.57	0.08	4e-05	0.47247	0.00160	0.1621	0.0010	0.1129	0.0005	0.8581	0.0030	55.90	0.27	4158	5	96	2	Cavosie et al 2004	Irregular Texture: Possible Alteration	6.00571	9.41205	10.9945	3.40634	4.9888	1.58246
17-4	core	400	186	0.46	0.07	4e-05	0.41695	0.00159	0.1657	0.0010	0.1054	0.0004	0.7640	0.0027	43.92	0.23	3971	6	92	2	Cavosie et al 2004	Irregular Texture: Possible Alteration	6.06706	9.48554	11.0667	3.41848	4.99961	1.58113
17-5	rim	276	248	0.9	0.18	0.0001	0.45581	0.00219	0.0884	0.0008	0.1146	0.0005	0.7370	0.0031	46.32	0.30	4104	7	87	2	Cavosie et al 2004		4.0685	6.58853	7.77402	2.52003	3.70552	1.18549
17-6	core	383	178	0.46	0.03	2e-05	0.46861	0.00085	0.1831	0.0012	0.1184	0.0006	0.7452	0.0029	48.15	0.21	4145	3	87	2	Cavosie et al 2004	Irregular Texture: Possible Alteration	5.80907	9.08214	10.596	3.27306	4.78692	1.51386
20-2	core	179	88	0.49	0.05	2e-05	0.45754	0.00099	0.2226	0.0016	0.1285	0.0006	0.8836	0.0042	55.74	0.29	4110	3	99	2	Cavosie et al 2004		2.55351	4.0897	4.80102	1.53619	2.24751	0.71132
20-3	rim	152	172	1.13	0.11	6e-05	0.44956	0.00221	0.0601	0.0007	0.0919	0.0005	0.7827	0.0041	48.52	0.35	4084	7	91	2	Cavosie et al 2004		2.24643	3.68201	4.36286	1.43558	2.11643	0.680852
34-2	core	164	60	0.37	0.08	4e-05	0.47477	0.00189	0.2271	0.0133	0.0962	0.0006	0.9125	0.0533	59.74	3.49	4165	6	100	2	Cavosie et al 2004		2.43439	3.81405	4.44947	1.37966	2.01508	0.635423
34-3	core	259	113	0.43	0.13	7e-05	0.47552	0.00164	0.1526	0.0090	0.0827	0.0006	0.8555	0.0499	56.09	3.28	4167	5	96	2	Cavosie et al 2004		3.8778	6.08124	7.09915	2.20344	3.22136	1.01791
37-2	rim	128	38	0.29	0.11	6e-05	0.37129	0.00170	0.2000	0.0120	0.0770	0.0006	0.8141	0.0476	41.68	2.44	3797	7	101	2	Cavosie et al 2004	Metamorphic	1.30203	2.36694	2.8559	1.06491	1.55387	0.488966
37-3	core	218	113	0.52	0.03	2e-05	0.39871	0.00083	0.2099	0.0056	0.1392	0.0005	0.8101	0.0213	44.54	1.17	3904	3	98	2	Cavosie et al 2004	Metamorphic	2.54306	4.4218	5.29271	1.87875	2.74965	0.870903
40-2	core	117	84	0.72	0.06	3e-05	0.44790	0.00144	0.2266	0.0133	0.1879	0.0010	0.9015	0.0527	55.67	3.26	4078	5	102	2	Cavosie et al 2004		1.65437	2.69416	3.18001	1.03979	1.52565	0.485855
58-2	core	118	99	0.84	0.19	0.0001	0.43540	0.00142	0.2278	0.0135	0.2253	0.0011	0.8934	0.0526	53.64	3.16	4036	5	102	2	Cavosie et al 2004		1.62096	2.68889	3.19018	1.06793	1.56922	0.501288
58-3	core	87	68	0.79	0.23	0.00012	0.44321	0.00221	0.2250	0.0135	0.2052	0.0019	0.9089	0.0534	55.54	3.28	4063	7	103	2	Cavosie et al 2004		1.21997	2.00062	2.36627	0.780645	1.1463	0.365651
66-2	core	166	59	0.35	0.16	9e-05	0.48448	0.00128	0.2217	0.0132	0.0921	0.0006	0.9146	0.0535	61.10	3.58	4195	4	100	2	Cavosie et al 2004		2.53135	3.9255	4.5673	1.39415	2.03596	0.641804
66-3	rim	88	46	0.53	0.43	0.00023	0.47645	0.00187	0.2069	0.0126	0.1395	0.0010	0.8641	0.0511	56.77	3.37	4170	6	96	2	Cavosie et al 2004		1.30383	2.06274	2.4146	0.758912	1.11077	0.351861
66-4	rim	139	51	0.37	0.18	9e-05	0.46924	0.00426	0.2253	0.0140	0.0989	0.0009	0.8934	0.0543	57.80	3.55	4147	13	99	2	Cavosie et al 2004		2.02895	3.19849	3.73717	1.16954	1.70822	0.538675
66-R1	rim	230	441	1.92	0.97	0.00052	0.42784	0.00198	0.0101	0.0005	0.0893	0.0011	0.2868	0.0071	16.76	0.42	3996	7	41	2	Cavosie et al 2004	Irregular Texture: Possible Alteration; Concordance <85%	3.85959	6.27546	7.44844	2.41586	3.58884	1.17298
66-R2	rim	109	41	0.38	0.14	8e-05	0.47259	0.00266	0.2072	0.0057	0.1012	0.0011	0.8267	0.0200	53.81	1.34	4156	8	93	2	Cavosie et al 2004		1.59246	2.51095	2.93416	0.918482	1.34169	0.42321
68-2	rim	154	242	1.57	0.32	0.00017	0.47283	0.00142	0.0896	0.0053	0.1813	0.0009	0.8295	0.0485	54.08	3.16	4159	4	94	2	Cavosie et al 2004		2.57618	4.12195	4.86526	1.54577	2.28908	0.743308
68-3	rim	121	77	0.64	0.1	5e-05	0.47842	0.00151	0.2149	0.0127	0.1655	0.0010	0.8659	0.0507	57.12	3.35	4176	5	96	2	Cavosie et al 2004		1.86166	2.92369	3.41836	1.06204	1.55671	0.494669
68-R3	rim	127	188	1.48	0.37	0.0002	0.47195	0.00127	0.0824	0.0023	0.1737	0.0013	0.7561	0.0191	49.20	1.25	4156	4	87	2	Cavosie et al 2004		2.10789	3.36705	3.9709	1.25916	1.86301	0.603849
78-2	core	198	77	0.39	0.07	4e-05	0.47537	0.00145	0.2199	0.0076	0.1045	0.0009	0.8535	0.0283	55.94	1.86	4167	5	95	2	Cavosie et al 2004		2.86372	4.53555	5.30631	1.67184	2.44259	0.770759
78-3	rim	90	37	0.41	0.35	0.00019	0.27989	0.00177	0.1127	0.0049	0.0839	0.0011	0.6201	0.0210	23.93	0.83	3362	10	93	2	Cavosie et al 2004		1.19776	1.96038	2.3123	0.762621	1.11455	0.351924
78-4	rim	111	45	0.4	0.12	6e-05	0.43831	0.00166	0.1840	0.0067	0.1004	0.0008	0.7779	0.0261	47.01	1.58	4046	6	92	2	Cavosie et al 2004		1.4764	2.41612	2.84966	0.939712	1.37325	0.43354
78-5	core	205	93	0.45	0.01	1e-05	0.46538	0.00188	0.2271	0.0077	0.1203	0.0007	0.8845	0.0294	56.75	1.90	4135	6	99	2	Cavosie et al 2004		2.98351	4.73235	5.54084	1.74884	2.55733	0.808494
78-6	rim	272	529	1.95	0.56	0.0003	0.33796	0.00262	0.0112	0.0005	0.1176	0.0031	0.2112	0.0058	9.84	0.28	3654	12	34	2	Cavosie et al 2004	Irregular Texture: Possible Alteration; Concordance <85%	4.1678	7.03489	8.42796	2.86709	4.26016	1.39308
81-2	core	170	72	0.42	0.06	3e-05	0.45399	0.00162	0.2184	0.0075	0.1129	0.0007	0.8511	0.0284	53.28	1.79	4098	5	97	2	Cavosie et al 2004		2.3932	3.83655	4.50297	1.44335	2.10976	0.666414
81-3	core	138	60	0.43	0.17	9e-05	0.45539	0.00166	0.2103	0.0076	0.1160	0.0013	0.8350	0.0280	52.43	1.77	4103	5	95	2	Cavosie et al 2004		1.94484	3.11859	3.66079	1.17375	1.71595	0.542198
81-4	rim	201	12	0.06	0.13	7e-05	0.33693	0.00119	0.1115	0.0088	0.0135	0.0004	0.6637	0.0221	30.84	1.03	3649	5	90	2	Cavosie et al 2004		1.67997	3.28795	4.01813	1.60799	2.33816	0.730179
81-5	rim	409	681	1.66	4.86	0.0026	0.37987	0.00639	0.0055	0.0009	0.1879	0.0027	0.1027	0.0028	5.38	0.17	3831	25	16	2	Cavosie et al 2004	Irregular Texture: Possible Alteration; Concordance <85%	4.03784	8.19477	10.1991	4.15692	6.16127	2.00435
90-2	core	296	404	1.36	0.17	9e-05	0.50750	0.00130	0.1106	0.0065	0.2015	0.0018	0.7859	0.0458	54.99	3.21	4263	4	88	2	Cavosie et al 2004		5.25799	8.14667	9.52707	2.88868	4.26909	1.38041
90-3	rim	672	679	1.01	0.4	0.00021	0.46302	0.00112	0.0249	0.0015	0.0806	0.0008	0.3568	0.0208	22.78	1.33	4128	4	48	2	Cavosie et al 2004	Irregular Texture: Possible Alteration; Concordance <85%	9.32724	15.5643	18.5101	6.23705	9.18282	2.94578
90-X	core	320	576	1.8	0.62	0.00033	0.50423	0.00128	0.0282	0.0008	0.1630	0.0015	0.3458	0.0085	24.04	0.60	4254	4	45	2	Cavosie et al 2004	Irregular Texture: Possible Alteration; Concordance <85%	5.89578	9.20635	10.8087	3.31057	4.91287	1.6023
90-1	rim	165	113	0.69	0.87	0.00047	0.42107	0.00262	0.0356	0.0017	0.0916	0.0014	0.3410	0.0095	19.80	0.57	3986	9	47	2	Cavosie et al 2004	Irregular Texture: Possible Alteration; Concordance <85%	2.22043	3.67944	4.36031	1.45901	2.13988	0.680867
90-2	core/rim	333	176	0.53	0.15	8e-05	0.45812	0.00228	0.0634	0.0019	0.0583	0.0004	0.6263	0.0164	39.56	1.05	4112	7	76	2	Cavosie et al 2004	Irregular Texture: Possible Alteration; Concordance <85%
90-3	core	630	1028	1.63	2.54	0.00136	0.39471	0.00321	0.0072	0.0007	0.1334	0.0037	0.1452	0.0039	7.9	0.22	3889	12	22	2	Cavosie et al 2004	Irregular Texture: Possible Alteration; Concordance <85%	11.4463	17.8211	20.892	6.37482	9.44564	3.07082
90-4	core	304	396	1.3	0.13	7e-05	0.50352	0.00083	0.1303	0.0035	0.2296	0.0006	0.7721	0.0205	53.61	1.43	4252	2	87	2	Cavosie et al 2004		5.37136	8.31261	9.71539	2.94125	4.34402	1.40277
90-5	rim	101	64	0.64	0.53	0.00028	0.43352	0.00175	0.0661	0.0029	0.0727	0.0007	0.6997	0.0189	41.82	1.14	4030	6	85	2	Cavosie et al 2004		1.35246	2.23859	2.65128	0.886126	1.29882	0.41269
D2-X	core	344	285	0.83	0.37	0.0002	0.44830	0.00097	0.0735	0.0019	0.1380	0.0008	0.4797	0.0112	29.65	0.69	4080	3	62	2	Cavosie et al 2004	Irregular Texture: Possible Alteration; Concordance <85%	4.74829	7.85671	9.31524	3.10842	4.56695	1.45853
D2	core	189	142	0.75	0.1	5e-05	0.43705	0.00150	0.1641	0.0046	0.1620	0.0009	0.7984	0.0214	48.11	1.30	4042	5	94	2	Cavosie et al 2004	Irregular Texture: Possible Alteration	2.5897	4.27787	5.06769	1.68817	2.47799	0.789825
D7-X	core	372	309	0.83	0.53	0.00029	0.51724	0.00142	0.0756	0.0020	0.1984	0.0012	0.3440	0.0086	24.53	0.62	4291	4	44	2	Cavosie et al 2004	Irregular Texture: Possible Alteration; Concordance <85%	6.79921	10.1617	11.7396	3.36252	4.9404	1.57788
D7-2	core	507	887	1.75	0.29	0.00016	0.51764	0.00152	0.0323	0.0011	0.1832	0.0009	0.3289	0.0109	23.47	0.78	4292	4	43	2	Cavosie et al 2004	Irregular Texture: Possible Alteration; Concordance <85%	10.0119	15.2226	17.741	5.21068	7.72911	2.51843
D7-3	core	275	173	0.63	0.07	3e-05	0.53765	0.00119	0.1985	0.0066	0.1472	0.0007	0.8859	0.0293	65.67	2.18	4348	3	94	2	Cavosie et al 2004		4.93763	7.34865	8.47132	2.41102	3.53369	1.12267
D7-4	core	327	569	1.74	0.27	0.00014	0.49911	0.00137	0.0373	0.0013	0.1397	0.0008	0.4990	0.0171	34.34	1.18	4239	4	62	2	Cavosie et al 2004	Irregular Texture: Possible Alteration; Concordance <85%	6.45245	9.80902	11.4309	3.35657	4.97845	1.62187
D7-5	core	526	1011	1.92	0.34	0.00018	0.49940	0.00155	0.0218	0.0008	0.1709	0.0009	0.2633	0.0088	18.13	0.61	4239	5	36	2	Cavosie et al 2004	Irregular Texture: Possible Alteration; Concordance <85%	10.5323	16.0606	18.7451	5.52828	8.21277	2.68449
D7-6	core	489	648	1.33	0.07	4e-05	0.45257	0.00085	0.0309	0.0010	0.0798	0.0016	0.5398	0.0141	33.69	0.88	4094	3	68	2	Cavosie et al 2004	Irregular Texture: Possible Alteration; Concordance <85%	9.3245	14.0705	16.3356	4.746	7.01113	2.26513
01JH-54b
2.5NM1 1-2-1	core	68	34	0.51	0.11	7e-05	0.42520	0.00238	0.2149	0.0037	0.1313	0.0014	0.8561	0.0100	50.19	0.65	4001	8	100	1	Cavosie 2005		0.873458	1.45781	1.72848	0.584349	0.855021	0.270672
2.5NM1 4-1-1	rim	81	37	0.46	0	0	0.46357	0.00233	0.2328	0.0035	0.1195	0.0012	0.9155	0.0100	58.51	0.70	4129	7	101	1	Cavosie 2005		1.25289	1.94423	2.26389	0.691346	1.011	0.319654
2.5NM1 4-1-2	rim	58	31	0.54	0	0	0.48634	0.00342	0.2360	0.0042	0.1447	0.0016	0.8989	0.0113	60.28	0.87	4200	10	98	1	Cavosie 2005		0.903702	1.40481	1.63726	0.501111	0.733558	0.232447
2.5NM2 7-1-1	core	70	29	0.42	0.15	9e-05	0.47254	0.00472	0.2246	0.0037	0.1109	0.0012	0.8837	0.0095	57.58	0.85	4158	15	98	1	Cavosie 2005		1.04293	1.63638	1.91027	0.593449	0.867344	0.273895
2.5NM2 7-1-2	core	63	23	0.37	0.11	1e-05	0.47462	0.00775	0.2270	0.0045	0.0970	0.0012	0.8872	0.0105	58.06	1.17	4164	24	98	1	Cavosie 2005		0.934218	1.46414	1.7082	0.529926	0.773983	0.244057
2.5NM2 7-1-3	rim	314	193	0.61	0.11	7e-05	0.33049	0.00100	0.0921	0.0014	0.0869	0.0008	0.6746	0.0067	30.74	0.32	3619	5	92	1	Cavosie 2005		2.68949	5.43633	6.71463	2.74684	4.02514	1.2783
2.5NM2 14-3-1	core	70	35	0.5	0.19	0.00012	0.32450	0.00206	0.1865	0.0032	0.1326	0.0015	0.7279	0.0083	32.57	0.42	3591	10	98	1	Cavosie 2005		0.572056	1.17359	1.45223	0.601536	0.880169	0.278633
2.5M 1-2-2	core	64	28	0.44	0.07	4e-05	0.38299	0.00153	0.2023	0.0021	0.1163	0.0008	0.7941	0.0051	41.93	0.32	3844	6	98	1	Cavosie 2005		0.695189	1.23977	1.49137	0.544584	0.796176	0.251591
2.5M 5-1-2	core	35	20	0.58	0	0	0.43731	0.00176	0.2245	0.0027	0.1523	0.0012	0.8837	0.0080	53.28	0.53	4043	6	101	1	Cavosie 2005		0.471787	0.775924	0.917216	0.304137	0.445429	0.141291
2.5M 8-1-2	core	60	28	0.46	0	0	0.44062	0.00245	0.2267	0.0023	0.1222	0.0008	0.8815	0.0056	53.55	0.45	4054	8	101	1	Cavosie 2005		0.809153	1.32206	1.55931	0.512907	0.750155	0.237249
2.5M 9-2-1	core	75	38	0.51	0.08	5e-05	0.44660	0.00286	0.2116	0.0036	0.1308	0.0014	0.8462	0.0093	52.11	0.66	4074	10	97	1	Cavosie 2005		1.03521	1.68039	1.97932	0.645177	0.944107	0.298931
2.5M 9-2-2	core	70	32	0.45	0	0	0.44144	0.00294	0.2293	0.0041	0.1195	0.0014	0.8910	0.0103	54.23	0.72	4057	10	101	1	Cavosie 2005		0.961553	1.55905	1.83531	0.597492	0.873756	0.276264
5M 4-1-1	core	71	33	0.46	0.12	8e-05	0.46374	0.00506	0.2340	0.0038	0.1236	0.0014	0.9039	0.0103	57.79	0.91	4130	16	101	1	Cavosie 2005		1.02955	1.63631	1.91695	0.60676	0.887399	0.280639
5M 4-1-2	rim	400	646	1.61	0.28	0.00017	0.41657	0.00396	0.0074	0.0003	0.0466	0.0005	0.2656	0.0016	15.26	0.17	3970	14	38	1	Cavosie 2005	Concordance <85%	5.53548	9.57395	11.5184	4.03848	5.98291	1.94444
5M 4-1-3	core	132	140	1.06	0.35	0.00022	0.43922	0 00238	0.0446	0.0011	0.1017	0.0011	0.4827	0.0042	29.24	0.30	4049	8	63	1	Cavosie 2005	Concordance <85%	2.02362	3.25768	3.84155	1.23406	1.81793	0.583867
5M 4-2-1	core	204	92	0.45	0.18	0.00011	0.42149	0.00221	0.0797	0.0025	0.0507	0.0006	0.7388	0.0075	42.94	0.49	3988	8	89	1	Cavosie 2005		3.05575	4.79532	5.59944	1.73957	2.54369	0.804119
5M 4-2-2	core	124	69	0.56	0.17	0.00011	0.47507	0.00265	0.1763	0.0029	0.1173	0.0010	0.8658	0.0078	56.71	0.60	4166	8	97	1	Cavosie 2005		1.87608	2.95109	3.4502	1.07501	1.57412	0.499107
01JH-60a
39-2	core	89	43	0.48	0.07	4e-05	0.47865	0.00585	0.2252	0.0048	0.1244	0.0008	0.9086	0.0178	59.97	1.38	4177	18	100	2	Cavosie et al 2004		1.35099	2.11378	2.46685	0.762788	1.11587	0.353078
39-3	rim	194	68	0.35	0.37	0.0002	0.39918	0.00121	0.0439	0.0039	0.0290	0.0007	0.7461	0.0141	41.06	0.78	3906	5	92	2	Cavosie et al 2004		2.22929	3.85731	4.60662	1.62803	2.37734	0.749308
47-2	core	133	173	1.3	0.38	0.0002	0.42503	0.00264	0.0437	0.0013	0.1010	0.0014	0.6313	0.0121	37.00	0.75	4000	9	79	2	Cavosie et al 2004	Concordance <85%	1.91075	3.19721	3.81073	1.28646	1.89998	0.613516
47-3	core	232	562	2.42	1.59	0.00085	0.43590	0.00210	0.0151	0.0009	0.1021	0.0016	0.5363	0.0105	32.23	0.65	4038	7	69	2	Cavosie et al 2004	Concordance <85%	3.67285	6.26764	7.54336	2.59479	3.8705	1.27572
51-2	core	35	11	0.31	0.01	0	0.45935	0.00239	0.2410	0.0067	0.0866	0.0011	0.8922	0.0192	56.50	1.25	4116	8	100	2	Cavosie et al 2004		0.49358	0.785587	0.91977	0.292007	0.42619	0.134183
51-3	core	42	13	0.31	0.14	8e-05	0.44103	0.00636	0.2276	0.0073	0.0885	0.0015	0.8782	0.0209	53.40	1.49	4055	21	100	2	Cavosie et al 2004		0.59202	0.942159	1.10302	0.350139	0.511001	0.160862
64-2	core	54	40	0.74	0.09	5e-05	0.43646	0.00188	0.2254	0.0050	0.1963	0.0014	0.8869	0.0181	53.37	1.11	4040	6	101	2	Cavosie et al 2004		0.737735	1.2193	1.44451	0.481564	0.706776	0.225213
64-4	rim	2787	20956	7.52	49.06	0.02623	0.27570	0.10126	-	-	1.0735	0.0260	0.0383	0.0022	1.46	0.54	3339	575	7	2	Cavosie et al 2004	Concordance <85%
68-3	core	174	48	0.27	1.17	0.00063	0.45355	0.00393	0.1356	0.0146	0.0710	0.0033	0.8080	0.0152	50.53	1.05	4097	13	93	2	Cavosie et al 2004		2.40053	3.84322	4.50502	1.44268	2.10448	0.661801
68-4	rim	91	52	0.56	0.33	0.00017	0.43251	0.00170	0.1220	0.0037	0.0952	0.0012	0.8025	0.0171	47.86	1.04	4026	6	94	2	Cavosie et al 2004		1.20647	1.99723	2.36458	0.790757	1.15811	0.367357
01JH-60b
2.5NM 4-3-2	core	29	14	0.46	0.09	5e-05	0.38366	0.00311	0.2038	0.0039	0.1183	0.0013	0.8219	0.0092	43.48	0.6	3846	12	101	1	Cavosie 2005		0.317159	0.565693	0.680732	0.248534	0.363573	0.115039
2.5NM 4-7-2	core	66	42	0.64	0.09	6e-05	0.37144	0.00154	0.1996	0.0026	0.1661	0.0014	0.7961	0.0061	40.77	0.36	3797	6	99	1	Cavosie 2005	Irregular Texture: Possible Alteration	0.695567	1.27486	1.54468	0.579293	0.849112	0.269819
2.5NM 6-1-2	core	38	40	1.03	0.12	8e-05	0.45711	0.00207	0.2167	0.0029	0.266	0.0018	0.8714	0.0087	54.92	0.6	4109	7	98	1	Cavosie 2005		0.570836	0.925688	1.09353	0.354852	0.522696	0.167844
2.5NM 7-1-2	core	55	31	0.57	0.02	1e-05	0.38275	0.0018	0.1954	0.0024	0.1456	0.0011	0.7885	0.0066	41.61	0.4	3843	7	98	1	Cavosie 2005		0.604583	1.08194	1.30363	0.477353	0.699043	0.22169
2.5NM 7-2-1	core	84	37	0.44	0.11	7e-05	0.43214	0.00228	0.2146	0.0026	0.1131	0.0007	0.8576	0.0058	51.1	0.44	4025	8	99	1	Cavosie 2005		1.09835	1.81345	2.14386	0.715104	1.04551	0.330411
2.5NM 7-3-2	core	77	41	0.53	0	0	0.46769	0.00295	0.2279	0.0027	0.1369	0.0011	0.9038	0.0065	58.28	0.56	4142	9	100	1	Cavosie 2005		1.13657	1.80163	2.1101	0.665059	0.97353	0.308471
2.5NM 8-4-2	core	101	39	0.39	0.05	3e-05	0.40745	0.00142	0.2082	0.002	0.0994	0.0006	0.8353	0.005	46.93	0.33	3937	5	99	1	Cavosie 2005		1.20263	2.05506	2.448	0.85243	1.24538	0.392945
2.5NM 8-10-2	core	47	20	0.44	0.03	2e-05	0.43753	0.0038	0.2147	0.0034	0.1124	0.0011	0.8619	0.0086	51.99	0.69	4043	13	99	1	Cavosie 2005		0.624556	1.02373	1.20805	0.399171	0.583489	0.184318
2.5NM 8-10-3	rim	305	83	0.27	0.03	2e-05	0.42551	0.00178	0.2114	0.0018	0.0695	0.0003	0.8563	0.0056	50.24	0.39	4002	6	100	1	Cavosie 2005		3.8332	6.3605	7.51965	2.5273	3.68646	1.15915
2.5NM 9-3-3	core	65	18	0.27	0.04	2e-05	0.43759	0.00148	0.2156	0.0028	0.0719	0.0006	0.8491	0.0064	51.23	0.43	4044	5	98	1	Cavosie 2005		0.851923	1.39095	1.63823	0.539026	0.786305	0.247279
2.5NM 9-4-2	core	93	30	0.32	0.03	2e-05	0.47064	0.00183	0.2135	0.0023	0.0817	0.0006	0.8665	0.0055	56.23	0.42	4152	6	97	1	Cavosie 2005		1.35807	2.13501	2.49217	0.776944	1.1341	0.357153
2.5M 3-3-2	core	45	18	0.4	0	0	0.44614	0.00442	0.2253	0.0041	0.1037	0.0011	0.8923	0.011	54.89	0.87	4072	15	101	1	Cavosie 2005		0.613511	0.994147	1.16971	0.380636	0.556204	0.175567
2.5M 7-1-2	core	79	58	0.74	0.04	3e-05	0.4379	0.00143	0.2148	0.002	0.1915	0.0011	0.861	0.0061	51.98	0.41	4045	5	99	1	Cavosie 2005		1.08384	1.78765	2.11672	0.703811	1.03288	0.329069
5M 3-1-2	core	165	158	0.96	0.78	0.00049	0.48818	0.00348	0.0629	0.0013	0.1143	0.0006	0.5498	0.0027	37.01	0.32	4206	11	67	1	Cavosie 2005	Concordance <85%	2.68734	4.20701	4.92342	1.51967	2.23607	0.716407
5M 3-2-2	core	43	21	0.49	0	0	0.43417	0.00186	0.2154	0.0031	0.1256	0.0012	0.8638	0.0082	51.71	0.54	4032	6	100	1	Cavosie 2005		0.568801	0.937642	1.10841	0.368841	0.539607	0.170766
5M 5-1-2	core	80	83	1.03	0.04	3e-05	0.4674	0.00233	0.2202	0.0035	0.2659	0.0037	0.8854	0.0061	57.06	0.49	4142	7	99	1	Cavosie 2005		1.23757	1.983	2.33539	0.745426	1.09782	0.352399
5M 5-1-3	rim	84	27	0.33	0.3	0.00019	0.4162	0.00176	0.1052	0.0039	0.0493	0.0009	0.7318	0.005	42	0.34	3969	6	89	1	Cavosie 2005		1.02646	1.72809	2.0506	0.701626	1.02414	0.322513
5M 10-3-2	core	100	42	0.41	0.13	8e-05	0.4701	0.00224	0.2197	0.0026	0.1041	0.0008	0.9057	0.0057	58.7	0.46	4150	7	100	1	Cavosie 2005		1.47129	2.31985	2.71158	0.848554	1.24028	0.391729
5M 10-4-2	core	127	91	0.72	0.15	9e-05	0.42117	0.00219	0.1637	0.0017	0.1527	0.0011	0.7999	0.0044	46.45	0.35	3986	8	95	1	Cavosie 2005	Irregular Texture: Possible Alteration	1.64174	2.77016	3.2974	1.12842	1.65566	0.52724
5M 12-2-2	core	42	15	0.36	0,03	2e-05	0.46898	0.00195	0.2207	0.0037	0.0936	0.0009	0.8764	0.0085	56.67	0.6	4147	6	98	1	Cavosie 2005		0.612486	0.96532	1.12776	0.352835	0.515276	0.162441
5M 12-2-3	rim	353	19	0.05	0.02	2e-05	0.41841	0.00158	0.1943	0.0062	0.0131	0.0004	0.8183	0.0085	47.21	0.25	3977	6	97	1	Cavosie 2005		4.23054	7.05172	8.33244	2.82118	4.10189	1.28072
10M 1-2-2	rim	118	86	0.73	0.34	0.00021	0.4263	0.00158	0.1122	0.002	0.1126	0.0011	0.7524	0.0083	44.23	0.51	4005	6	90	1	Cavosie 2005	Irregular Texture: Possible Alteration	1.57765	2.62806	3.11908	1.05041	1.54143	0.49102
10M 1-2-3	rim	69	31	0.44	0.06	4e-05	0.43041	0.00237	0.2036	0.0057	0.1073	0.0028	0.8685	0.0065	51.54	0.48	4019	8	100	1	Cavosie 2005	Irregular Texture: Possible Alteration	0.897684	1.48591	1.7578	0.588225	0.860114	0.271889
10M 5-1-2	core	166	192	1.15	1.11	0.00069	0.44626	0.00194	0.0857	0.0023	0.1512	0.0016	0.6858	0.0059	42.2	0.4	4073	6	83	1	Cavosie 2005	Concordance <85%	2.43351	4.00692	4.75377	1.57341	2.32026	0.746846
10M 5-1-3	core	190	259	1.37	1.39	0.00087	0.43167	0.00188	0.0735	0.0019	0.1974	0.0033	0.5301	0.0046	31.55	0.31	4023	7	68	1	Cavosie 2005	Concordance <85%	2.83788	4.69166	5.57748	1.85378	2.7396	0.885815
10M 5-1-4	rim	619	547	0.88	0.62	0.00039	0.29305	0.00084	0.018	0.0011	0.0292	0.001	0.5846	0.0015	23.62	0.09	3434	4	86	1	Cavosie 2005		4.28048	9.91988	12.5714	5.6394	8.29089	2.65149
10M 6-1-1	-	125	69	0.55	0.19	0.00012	0.28296	0.00164	0.1772	0.0033	0.1471	0.0017	0.6868	0.0039	26.79	0.22	3379	9	100	1	Cavosie 2005		0.768922	1.85185	2.35455	1.08293	1.58563	0.502693
10M 9-1-2	core	52	29	0.55	0.02	1e-05	0.39639	0.00438	0.1912	0.0027	0.1333	0.0014	0.8141	0.007	44.49	0.62	3895	17	99	1	Cavosie 2005		0.603365	1.05426	1.26362	0.450899	0.660253	0.209354
W74/3
7-2	core	150	65	0.43	0.08	4e-05	0.44788	0.00142	0.2166	0.0062	0.1141	0.0008	0.8620	0.0230	53.23	1.43	4078	5	98	2	Cavosie et al 2004		2.06362	3.33915	3.92832	1.27553	1.8647	0.589173
13-2	unk	310	239	0.77	0.04	2e-05	0.42743	0.00146	0.2137	0.0057	0.2065	0.0009	0.8289	0.0217	48.85	1.29	4008	5	97	2	Cavosie et al 2004		4.11694	6.8941	8.19439	2.77716	4.07745	1.30029
15-2	core	70	13	0.19	0.15	8e-05	0.43000	0.00401	0.2047	0.0078	0.0504	0.0006	0.8280	0.0224	49.09	1.41	4017	14	97	2	Cavosie et al 2004		0.885174	1.45706	1.71832	0.571884	0.833142	0.261258
17-2	core	192	118	0.61	0.28	0.00015	0.42870	0.00112	0.0993	0.0029	0.0977	0.0006	0.6836	0.0180	40.41	1.07	4013	4	84	2	Cavosie et al 2004	Concordance <85%	2.52387	4.20345	4.98508	1.67958	2.46121	0.781627
30-2	unk	117	59	0.5	0.26	0.00014	0.42855	0.00134	0.1797	0.0052	0.1266	0.0008	0.7710	0.0205	45.56	1.22	4012	5	92	2	Cavosie et al 2004		1.65842	2.66452	3.13063	1.0061	1.47221	0.466111
30-3	unk	121	49	0.41	0.13	7e-05	0.45524	0.00670	0.1979	0.0061	0.1053	0.0012	0.8075	0.0221	50.69	1.57	4102	22	93	2	Cavosie et al 2004		1.6987	2.723	3.19556	1.0243	1.49685	0.472555
32-2	unk	297	472	1.59	0.53	0.00029	0.45181	0.00125	0.0357	0.0011	0.1255	0.0006	0.5097	0.0135	31.75	0.85	4091	4	65	2	Cavosie et al 2004	Concordance <85%	4.60274	7.59099	9.02869	2.98825	4.42595	1.4377
36-2	unk	139	46	0.33	0.12	6e-05	0.41496	0.00205	0.1897	0.0060	0.0853	0.0011	0.7810	0.0217	44.69	1.26	3964	7	94	2	Cavosie et al 2004		1.69163	2.85443	3.38916	1.1628	1.69753	0.534726
36-3	unk	129	42	0.32	0.13	7e-05	0.41213	0.00334	0.1729	0.0051	0.0835	0.0007	0.7120	0.0193	40.46	1.14	3954	12	88	2	Cavosie et al 2004		1.56907	2.64729	3.143	1.07822	1.57393	0.495711
41-2	core	67	43	0.64	0.11	6e-05	0.45820	0.00177	0.2152	0.0065	0.1691	0.0013	0.8504	0.0242	53.72	1.54	4112	6	96	2	Cavosie et al 2004		0.971441	1.56	1.8342	0.58856	0.862755	0.274195
58-2	unk	142	75	0.53	0.07	4e-05	0.43797	0.00131	0.1951	0.0054	0.1403	0.0008	0.7663	0.0203	46.28	1.24	4045	4	91	2	Cavosie et al 2004		1.90977	3.13542	3.70381	1.22565	1.79404	0.568387
62-2	core	255	72	0.28	0.08	4e-05	0.46463	0.00184	0.1741	0.0054	0.0700	0.0011	0.7454	0.0197	47.75	1.28	4133	6	87	2	Cavosie et al 2004		3.64325	5.75976	6.73094	2.11651	3.08769	0.971188
74-2	unk	175	155	0.89	0.34	0.00018	0.43500	0.00333	0.0553	0.0018	0.0884	0.0013	0.6202	0.0164	37.20	1.02	4035	11	77	2	Cavosie et al 2004	Concordance <85%	2.41229	4.00711	4.75701	1.59482	2.34471	0.749894
114-2	core	211	70	0.33	0.1	5e-05	0.43283	0.00146	0.1266	0.0039	0.0567	0.0006	0.7981	0.0218	47.63	1.31	4027	5	94	2	Cavosie et al 2004		2.73464	4.5	5.31184	1.76535	2.5772	0.811843
131-2	unk	451	91	0.2	0.02	1e-05	0.46367	0.00217	0.2134	0.0061	0.0528	0.0003	0.8459	0.0233	54.08	1.51	4130	7	96	2	Cavosie et al 2004	Irregular Texture: Possible Alteration	6.37464	10.069	11.7579	3.69433	5.3833	1.68897
131-3	unk	1958	1922	0.98	5.18	0.00277	0.35828	0.00917	0.0085	0.0035	0.1813	0.0004	0.1094	0.0121	5.4	0.61	3743	39	18	2	Cavosie et al 2004	Irregular Texture: Possible Alteration; Concordance <85%	29.8016	47.8984	56.437	18.0968	26.6354	8.53854
131-4	unk	521	100	0.19	0.08	4e-05	0.45602	0.00169	0.1983	0.0059	0.0490	0.0004	0.8271	0.0228	52.01	1.45	4105	6	95	2	Cavosie et al 2004	Irregular Texture: Possible Alteration	7.35692	11.6177	13.5648	4.26082	6.20789	1.94707
133-2	core	95	36	0.38	0.26	0.00014	0.42397	0.00181	0.1946	0.0065	0.1018	0.0009	0.7861	0.0224	45.95	1.32	3996	6	94	2	Cavosie et al 2004		1.19967	2.00054	2.36961	0.80087	1.16993	0.369063
134-2	core	147	139	0.95	0.42	0.00022	0.41101	0.00220	0.0793	0.0028	0.1240	0.0009	0.6692	0.0192	37.92	1.11	3950	8	84	2	Cavosie et al 2004	Concordance <85%	1.93877	3.29028	3.92714	1.35151	1.98837	0.636861
134-3	core	101	52	0.52	0.24	0.00013	0.42049	0.00178	0.2033	0.0064	0.1403	0.0011	0.8043	0.0229	46.63	1.35	3984	6	96	2	Cavosie et al 2004		1.27748	2.14743	2.55064	0.869952	1.27316	0.403213
143-2	core	101	26	0.26	0.07	4e-05	0.47291	0.00380	0.2007	0.0069	0.0600	0.0007	0.9161	0.0260	59.74	1.77	4159	12	101	2	Cavosie et al 2004		1.47528	2.31019	2.69287	0.834909	1.21759	0.382678
152-2	core	122	56	0.46	0.1	5e-05	0.43340	0.00168	0.2044	0.0063	0.1197	0.0010	0.8174	0.0231	48.85	1.39	4029	6	96	2	Cavosie et al 2004		1.60443	2.64608	3.12775	1.04165	1.52332	0.481669
154-1	core	61	18	0.3	0.22	0.00012	0.47468	0.01056	0.2060	0.0097	0.0790	0.0016	0.8478	0.0248	55.49	2.04	4164	33	95	2	Cavosie et al 2004		0.898477	1.40583	1.63876	0.507348	0.740284	0.232937
154-2	rim	59	18	0.3	0.38	0.0002	0.44706	0.00252	0.1975	0.0109	0.0784	0.0011	0.8601	0.0253	53.02	1.59	4075	8	98	2	Cavosie et al 2004		0.799205	1.29071	1.51648	0.491509	0.717274	0.225766
170-2	core	89	28	0.31	0.27	0.00014	0.44503	0.00202	0.1802	0.0063	0.0848	0.0009	0.7374	0.0210	45.25	1.31	4069	7	88	2	Cavosie et al 2004		1.19973	1.9423	2.28353	0.742571	1.0838	0.341231
174-2	core	134	99	0.74	0.11	6e-05	0.45273	0.00198	0.2242	0.0065	0.1984	0.0011	0.8754	0.0247	54.64	1.56	4094	7	99	2	Cavosie et al 2004		1.92765	3.12229	3.68095	1.19464	1.7533	0.558657
174-3	core	147	92	0.63	0.02	1e-05	0.44760	0.00158	0.2211	0.0063	0.1598	0.0009	0.8961	0.0252	55.30	1.57	4077	5	101	2	Cavosie et al 2004		2.0921	3.38026	3.98	1.28816	1.8879	0.599741
W74/4
1-1	core	82	44	0.53	0	0	0.42153	0.00130	0.2151	0.0024	0.1376	0.0010	0.8622	0.0075	50.11	0.46	3988	5	101	1	Cavosie 2005		1.04355	1.75225	2.08102	0.7087	1.03747	0.328768
2-1	core	69	26	0.38	0.06	4e-05	0.45933	0.00487	0.2170	0.0033	0.0955	0.0010	0.8951	0.0082	56.69	0.80	4116	16	100	1	Cavosie 2005		0.979008	1.56049	1.82843	0.581486	0.849426	0.26794
3-1	core	130	43	0.33	10.1	0.00631	0.36478	0.02030	0.2244	0.0941	0.1496	0.0142	0.5736	0.0144	28.85	1.76	3770	84	78	1	Cavosie 2005	Concordance <85%	1.62397	2.71145	3.21154	1.08749	1.58757	0.500087
3-2	core	133	47	0.35	0.03	2e-05	0.42204	0.00146	0.2163	0.0024	0.0918	0.0006	0.8600	0.0066	50.04	0.42	3990	5	100	1	Cavosie 2005		1.66524	2.78187	3.29587	1.11664	1.63064	0.514002
4-1	core	137	102	0.74	0.04	3e-05	0.42624	0.00179	0.1510	0.0017	0.1451	0.0011	0.7988	0.0062	46.95	0.41	4004	6	95	1	Cavosie 2005		1.80767	3.03011	3.6019	1.22244	1.79423	0.571783
5-1	core	311	197	0.63	0.1	6e-05	0.42491	0.00074	0.1738	0.0017	0.1576	0.0006	0.7241	0.0060	42.42	0.36	4000	3	88	1	Cavosie 2005		4.04354	6.77201	8.04271	2.72847	3.99918	1.2707
6-1	core	308	60	0.19	0.02	1e-05	0.40027	0.00171	0.2002	0.0021	0.0478	0.0003	0.8393	0.0056	46.32	0.37	3910	6	100	1	Cavosie 2005		3.49712	6.01718	7.16892	2.52006	3.67181	1.15175
7-1	core	90	29	0.33	0	0	0.48934	0.00710	0.2411	0.0036	0.0835	0.0010	0.9743	0.0083	65.73	1.11	4209	21	104	1	Cavosie 2005		1.38591	2.13775	2.48336	0.751838	1.09744	0.345606
7-2	core	85	32	0.37	0	0	0.48526	0.00513	0.2335	0.0039	0.0947	0.0013	0.9448	0.0082	63.21	0.87	4197	16	102	1	Cavosie 2005		1.31569	2.03197	2.36202	0.716284	1.04633	0.330048
8-1	core	236	183	0.78	0.01	1e-05	0.47535	0.00154	0.2228	0.0017	0.1973	0.0006	0.9047	0.0063	59.30	0.45	4167	5	100	1	Cavosie 2005		3.66797	5.78361	6.77434	2.11564	3.10637	0.990728
8-2	core	176	82	0.47	0	0	0.47746	0.00098	0.2287	0.0023	0.1196	0.0008	0.9200	0.0067	60.56	0.46	4173	3	101	1	Cavosie 2005		2.65736	4.1617	4.85753	1.50435	2.20017	0.695825
										References: (1) Cavosie, 2005; (2) Cavosie et al., 2004
																												271

## Sheet: Appendix D - d18ORamUPb
American Mineralogist: October 2024 Online Materials AM-24-109180 (use tabs to navigate to other tables)
Cameron et al.: Igneous Hadean zircon
Appendix D. Raman data for zircon domains analyzed by SIMS.
		Red Data:	Data judged to be "texturally altered"
		Blue Data:	Data correlated with U-Pb analyses <85% concordant
		White Data:	Distinctive domains, poorly correlated with d18O-Age correlation
		Grey Data:	Metamorphic zircon
								δ18O													δ18O-Age Correlation							δ18O-Raman Correlation																		U-Pb
An. #	Session	Spot name, Comment		δ18O (‰, VSMOW)	2SD (external)	Mass Bias (‰)	δ18O (‰, measured)	2 SE (internal)	16O (Gcps)	Primary Beam Current (nA)	Yield (Gcps/nA)	Time	X (um)	Y (um)	DTFA-X	DTFA-Y	C-bkg	H1-bkg	16OH/16O	16OH/16O (corrected)	Assigned Age (Ma)	Comment	Peak Pos (cm-1)	FWHMmeas (cm-1)	ApF	FWHM Corrected (cm-1)	Δ(meas-corr) (cm-1)	Deff (1015 α-decays/mg)	Avg FWHMCorrected (cm-1)	Avg Deff (1015 α-decays/mg)	Max Deff (1015 α-decays/mg)	Min Deff (1015 α-decays/mg)	Δ(Deff) (1015 α-decays/mg)	Δ(Deff) (%)		grain-spot	run	area	U (µg/g)	Th (µg/g)	Th/U	%comm 206Pb	204Pb/206Pb	207Pb*/206Pb*	1σ	208Pb*/232Th	1σ	208Pb*/206Pb*	1σ
																													δ18O Spot	δ18O Spot	δ18O Spot	δ18O Spot	δ18O Spot	δ18O Spot
Mount: 01JH-13a
224	1	2.5NM 2-2.1		6.21033	0.301374		7.706	0.254	2.20668	2.25269	0.979574	02:42	-3412	4888							4030
225	1	2.5NM 2-2.2		6.27433	0.301374		7.77	0.257	2.19976	2.27041	0.968883	02:45	-3285	4758
226	1	2.5NM 2-2.3		6.86433	0.301374		8.36	0.16	2.189	2.26063	0.968313	02:48	-3496	4942
97	2	01JH-13a 2.5NM 2-2 zrc		6.3	0.23	1.3	7.606	0.148	2.74573	1.88899	1.45354	09:19	-1718	5354	-17	-12	-2635140	-51733	0.000910316	0.000158744
297	4	01JH-13a 2.5NM 2-2 1		6.39521	0.345802	0.410162	6.808	0.238	2.65932	1.78807	1.48726	08:51	-2049	4451	-12	-12	-1826420	-51742	0.000797078	2.61073e-05
298	4	01JH-13a 2.5NM 2-2 2 Cs-Res=155		6.26827	0.345802	0.410162	6.681	0.253	2.86133	1.90217	1.50424	08:57	-2037	4440	-12	-12	-1826420	-51742	0.000774553	3.58232e-06
299	4	01JH-13a 2.5NM 2-2 3		6.24328	0.345802	0.410162	6.656	0.266	2.85932	1.92158	1.48801	09:01	-2011	4462	-12	-13	-1826420	-51742	0.000809206	3.82351e-05
227	1	2.5NM 3-1.1		6.11133	0.301374		7.607	0.247	2.1693	2.25621	0.961481	02:52	-1984	4578							3961
228	1	2.5NM 3-1.2		6.30333	0.301374		7.799	0.223	2.18262	2.26615	0.963141	02:55	-1813	4644
300	4	01JH-13a 2.5NM 3-1		6.13532	0.345802	0.410162	6.548	0.277	2.83632	1.91571	1.48056	09:06	-593	4142	-11	-13	-1826420	-51742	0.000866075	9.51045e-05
301	4	01JH-13a 2.5NM 3-1 2, on crack				0.410162	6.826	0.25	2.81635	1.90405	1.47914	09:10	-611	4156	-10	-12	-1826420	-51742	0.00101605
229	1	2.5NM 3-6.1		6.58133	0.301374		8.077	0.162	2.21349	2.25476	0.981697	02:58	-4152	4543							4006
230	1	2.5NM 3-6.2		6.71133	0.301374		8.207	0.262	2.1902	2.25738	0.970236	03:02	-4274	4427
231	1	2.5NM 3-6.3		6.58233	0.301374		8.078	0.271	2.22527	2.26321	0.983237	03:05	-4240	4663
302	4	01JH-13a 2.5NM 3-6		6.4402	0.345802	0.410162	6.853	0.237	2.79133	1.88105	1.48392	09:15	-2754	4124	-9	-14	-1826420	-51742	0.000882977	0.000112007
303	4	01JH-13a 2.5NM 3-6 2		6.30425	0.345802	0.410162	6.717	0.253	2.76991	1.8649	1.48529	09:19	-2733	4149	-9	-13	-1826420	-51742	0.00091568	0.000144709
304	4	01JH-13a 2.5NM 3-6 3		6.52616	0.345802	0.410162	6.939	0.271	2.73666	1.85128	1.47825	09:23	-2735	4101	-9	-14	-1826420	-51742	0.000945325	0.000174354
232	1	2.5NM 4-4.1		6.17533	0.301374		7.671	0.312	2.17176	2.27092	0.956337	03:09	-5586	3946							4041
233	1	2.5NM 4-4.2		5.66033	0.301374		7.156	0.228	2.17882	2.26372	0.962494	03:13	-5456	3904
234	1	2.5NM 4-4.3		5.94233	0.301374		7.438	0.195	2.22968	2.24514	0.993115	03:16	-5767	4025
305	4	01JH-13a 2.5NM 4-4		5.9534	0.345802	0.410162	6.366	0.358	2.72395	1.83032	1.48824	09:29	-4177	3511	-15	-16	-1826420	-51742	0.000843288	7.23171e-05
306	4	01JH-13a 2.5NM 4-4 2		5.73149	0.345802	0.410162	6.144	0.249	2.70293	1.81287	1.49097	09:33	-4173	3526	-14	-16	-1826420	-51742	0.000858266	8.72953e-05
235	1	2.5NM 5-3.1		6.55833	0.301374		8.054	0.252	2.23316	2.23888	0.997445	03:20	-4887	3603							4073
236	1	2.5NM 5-3.2		6.35833	0.301374		7.854	0.23	2.20304	2.24534	0.981161	03:23	-4800	3711
237	1	2.5NM 5-3.3		5.73833	0.301374		7.234	0.204	2.17182	2.23321	0.972512	03:27	-4840	3654
238	1	2.5NM 5-3.4		6.38533	0.301374		7.881	0.272	2.20359	2.24096	0.983326	03:30	-4563	3615
311	4	01JH-13a 2.5NM 5-3		6.01263	0.229905	0.264777	6.279	0.314	2.83816	1.9145	1.48246	09:57	-3406	3218	-12	-18	-1826420	-51742	0.000964126	0.000150699
312	4	01JH-13a 2.5NM 5-3 2, on crack				0.264777	6.361	0.264	2.82188	1.90937	1.47791	10:00	-3388	3222	-11	-17	-1826420	-51742	0.00105421
313	4	01JH-13a 2.5NM 5-3 3		5.64173	0.229905	0.264777	5.908	0.318	2.81572	1.90225	1.4802	10:03	-3369	3225	-12	-17	-1826420	-51742	0.00111479	0.00030136
239	1	2.5NM 6-2.1		6.21633	0.301374		7.712	0.232	2.21433	2.21905	0.997874	03:34	-5964	3097							4040
240	1	2.5NM 6-2.2		5.81833	0.301374		7.314	0.183	2.18701	2.24037	0.976182	03:37	-5818	3147
241	1	2.5NM 6-2.3		6.12833	0.301374		7.624	0.154	2.18702	2.23704	0.977639	03:40	-5888	3151
314	4	01JH-13a 2.5NM 6-2		6.07961	0.229905	0.264777	6.346	0.214	2.79797	1.88614	1.48344	10:08	-4526	2631	-6	-17	-1826420	-51742	0.000822872	9.44519e-06
315	4	01JH-13a 2.5NM 6-2 2		6.25757	0.229905	0.264777	6.524	0.241	2.77773	1.87816	1.47896	10:11	-4532	2641	-5	-17	-1826420	-51742	0.000856129	4.27024e-05
246	1	2.5NM_6-3.1 core		7.2393	0.449009		8.671	0.297	2.12939	2.18533	0.9744	03:58	-1954	3409							4136
247	1	2.5NM_6-3.2 rim		6.8423	0.449009		8.274	0.242	2.12354	2.17638	0.975721	04:01	-1815	3290
248	1	2.5NM_6-3.3 core		7.1803	0.449009		8.612	0.229	2.12622	2.1664	0.981452	04:04	-2037	3426
249	1	2.5NM_6-3.4 rim		6.7213	0.449009		8.153	0.258	2.09421	2.18338	0.959159	04:07	-2037	3426
316	4	01JH-13a 2.5NM 6-3		7.19432	0.229905	0.264777	7.461	0.254	2.77666	1.87018	1.4847	10:16	-550	3031	-11	-15	-1826420	-51742	0.000818431	5.00389e-06
317	4	01JH-13a 2.5NM 6-3 2		7.19132	0.229905	0.264777	7.458	0.271	2.76351	1.86036	1.48547	10:20	-528	3030	-11	-14	-1826420	-51742	0.000863777	5.03506e-05
318	4	01JH-13a 2.5NM 6-3 3		6.8954	0.229905	0.264777	7.162	0.27	2.76007	1.85281	1.48967	10:23	-576	3047	-11	-15	-1826420	-51742	0.000924627	0.0001112
250	1	2.5NM_8-2.1		6.4703	0.449009		7.902	0.279	2.11092	2.14054	0.986161	04:12	-4982	2090							4085
251	1	2.5NM_8-2.2		6.7323	0.449009		8.164	0.195	2.1293	2.15255	0.989198	04:16	-5092	2223
252	1	2.5NM_8-2.3		6.4823	0.449009		7.914	0.307	2.12109	2.1556	0.983989	04:19	-5115	2086
319	4	01JH-13a 2.5NM 8-2		6.58548	0.229905	0.264777	6.852	0.221	2.71973	1.82652	1.48902	10:30	-3630	1657	-16	-15	-1826420	-51742	0.000790997	-2.24304e-05
320	4	01JH-13a 2.5NM 8-2 2		6.41952	0.229905	0.264777	6.686	0.238	2.7033	1.81753	1.48735	10:34	-3648	1673	-16	-16	-1826420	-51742	0.000821666	8.23899e-06
253	1	2.5NM_9-1.1 core		6.9143	0.449009		8.346	0.226	2.09666	2.13753	0.980877	04:23	-3610	1592							3604
254	1	2.5NM_9-1.2 rim		6.1533	0.449009		7.585	0.288	2.10966	2.14508	0.983487	04:27	-3788	1637
255	1	2.5NM_9-1.3 core		6.8323	0.449009		8.264	0.253	2.0968	2.15087	0.97486	04:30	-3686	1588
256	1	2.5NM_9-1.4 rim		6.1083	0.449009		7.54	0.295	2.09151	2.13358	0.980281	04:34	-3475	1614
257	1	2.5NM_9-1.5 rim		6.0403	0.449009		7.472	0.218	2.05453	2.14113	0.959551	04:37	-3402	1713
258	1	2.5NM_9-1.6 core		6.6303	0.449009		8.062	0.217	2.07386	2.14371	0.967415	04:41	-3663	1587
259	1	2.5NM_9-1.7 c/r boundary		6.6173	0.449009		8.049	0.228	2.0839	2.13241	0.977249	04:45	-3548	1652
260	1	2.5NM_9-1.8 core		6.7353	0.449009		8.167	0.264	2.09567	2.15158	0.974015	04:48	-3583	1643
261	1	2.5NM_9-1.9 rim		6.4063	0.449009		7.838	0.241	2.07364	2.14477	0.966834	04:51	-3478	1696
262	1	2.5NM_9-1.10 core		6.6113	0.449009		8.043	0.204	2.07841	2.1389	0.97172	04:55	-3637	1589
263	1	2.5NM_9-1.11 rim		6.2333	0.449009		7.665	0.2	2.06723	2.14117	0.965465	04:58	-3450	1688
264	1	2.5NM_9-1.12 core		6.6503	0.449009		8.082	0.248	2.06918	2.13933	0.967209	05:02	-3732	1580
265	1	2.5NM_9-1.13 rim		6.0433	0.449009		7.475	0.354	2.06552	2.14512	0.962892	05:05	-3771	1580
272	1	2.5NM_9-1.14 core		6.67964	0.429109		8.048	0.262	2.04384	2.13808	0.955921	05:29	-3626	1656
273	1	2.5NM_9-1.15 core		6.88764	0.429109		8.256	0.261	2.09025	2.14356	0.975132	05:32	-3624	1693
274	1	2.5NM_9-1.16 rim		6.30564	0.429109		7.674	0.209	2.07798	2.14504	0.968737	05:35	-3508	1692
275	1	2.5NM_9-1.17 rim		6.34864	0.429109		7.717	0.27	2.07956	2.15995	0.962784	05:38	-3539	1679
276	1	2.5NM_9-1.18 rim		6.21364	0.429109		7.582	0.267	2.07097	2.1497	0.963375	05:41	-3424	1704
100	2	01JH-13a 2.5NM 9-1 zrc		6.16748	0.231626	1.29852	7.474	0.185	2.66808	1.84776	1.44395	09:39	-1843	2265	-19	-14	-2635140	-51733	0.000818736	6.71642e-05
321	4	01JH-13a 2.5NM 9-1		6.61947	0.229905	0.264777	6.886	0.267	2.6738	1.79234	1.4918	10:38	-2242	1178	-13	-16	-1826420	-51742	0.000925392	0.000111965
322	4	01JH-13a 2.5NM 9-1 2 Cs-Res=157		6.69145	0.229905	0.264777	6.958	0.242	2.84131	1.87534	1.51509	10:43	-2218	1182	-14	-16	-1826420	-51742	0.000882918	6.94906e-05
279	1	2.5M_1-3.1 core		6.13864	0.429109		7.507	0.278	2.09011	2.12435	0.983883	05:46	-4801	-621							4126
280	1	2.5M_1-3.2 rim		5.76864	0.429109		7.137	0.226	2.08687	2.1434	0.973624	05:50	-4624	-654
281	1	2.5M_1-3.3 ?		6.27764	0.429109		7.646	0.201	2.05442	2.13906	0.96043	05:53	-4723	-684
327	4	01JH-13a 2.5M 1-3		6.41751	0.125459	0.273732	6.693	0.225	2.85735	1.91156	1.49477	11:02	-3318	-1080	-10	-14	-1826420	-51742	0.000792548	-1.02943e-05
328	4	01JH-13a 2.5M 1-3 2		6.40651	0.125459	0.273732	6.682	0.268	2.85447	1.90573	1.49783	11:06	-3312	-1060	-10	-15	-1826420	-51742	0.000830032	2.71898e-05
329	4	01JH-13a 2.5M 1-3 3		6.29954	0.125459	0.273732	6.575	0.299	2.82912	1.89772	1.4908	11:09	-3302	-1042	-10	-16	-1826420	-51742	0.000837276	3.44338e-05
282	1	2.5M_2-1.1		6.35064	0.429109		7.719	0.243	2.06253	2.13562	0.965776	05:57	-4725	-978							4159
283	1	2.5M_2-1.2		6.65464	0.429109		8.023	0.261	2.08305	2.13898	0.973854	06:00	-4849	-993
284	1	2.5M_2-1.3		5.94464	0.429109		7.313	0.257	2.08676	2.14825	0.971377	06:04	-4469	-1000
285	1	2.5M_2-1.4		6.32064	0.429109		7.689	0.339	2.06534	2.13515	0.967305	06:07	-4578	-1013
102	2	01JH-13a 2.5M 2-1 zrc		6.34724	0.231626	1.29852	7.654	0.246	2.6502	1.82891	1.44906	09:49	-2941	-420	-17	-10	-2635140	-51733	0.000844353	9.27813e-05
330	4	01JH-13a 2.5M 2-1		6.4515	0.125459	0.273732	6.727	0.291	2.81159	1.88794	1.48924	11:14	-3398	-1436	-10	-14	-1826420	-51742	0.000845026	4.21832e-05
331	4	01JH-13a 2.5M 2-1 2		6.49749	0.125459	0.273732	6.773	0.15	2.79025	1.88649	1.47907	11:17	-3416	-1432	-10	-15	-1826420	-51742	0.000968794	0.000165952
286	1	2.5M_3-3.1		6.23164	0.429109		7.6	0.236	2.07789	2.12357	0.97849	06:12	-2393	-1622							4104
287	1	2.5M_3-3.2		6.36164	0.429109		7.73	0.253	2.08515	2.14888	0.970345	06:15	-2535	-1589
332	4	01JH-13a 2.5M 3-3		6.25456	0.125459	0.273732	6.53	0.245	2.79005	1.87245	1.49006	11:22	-1077	-1988	-11	-16	-1826420	-51742	0.000855041	5.21986e-05
333	4	01JH-13a 2.5M 3-3 2		5.99963	0.125459	0.273732	6.275	0.285	2.78954	1.87131	1.49069	11:25	-1046	-1984	-12	-15	-1826420	-51742	0.000867711	6.48683e-05
334	4	01JH-13a 2.5M 3-3 3		6.31554	0.125459	0.273732	6.591	0.233	2.76107	1.86063	1.48394	11:29	-1077	-2004	-11	-15	-1826420	-51742	0.000881508	7.86652e-05
288	1	2.5M_3-4.1		6.60864	0.429109		7.977	0.22	2.0865	2.13691	0.976408	06:19	-4039	-1549							4044
289	1	2.5M_3-4.2		6.84364	0.429109		8.212	0.29	2.09067	2.15705	0.969224	06:22	-4148	-1678
290	1	2.5M_3-4.3		6.32464	0.429109		7.693	0.277	2.08293	2.14919	0.96917	06:25	-4126	-1504
335	4	01JH-13a 2.5M 3-4, on crack				0.273732	6.917	0.237	2.7449	1.83908	1.49254	11:33	-2584	-1942	-7	-15	-1826420	-51742	0.00122503
336	4	01JH-13a 2.5M 3-4 2		6.23056	0.125459	0.273732	6.506	0.282	2.73783	1.8345	1.49241	11:37	-2522	-1953	-8	-15	-1826420	-51742	0.000846362	4.35199e-05
291	1	2.5M_5-1.1		6.19364	0.429109		7.562	0.257	2.09341	2.13483	0.980595	06:29	-3716	-2550							3976
292	1	2.5M_5-1.2		6.34564	0.429109		7.714	0.27	2.09173	2.14367	0.975769	06:32	-3810	-2428
293	1	2.5M_5-1.3		6.57064	0.429109		7.939	0.219	2.09139	2.14223	0.97627	06:35	-3585	-2486
337	4	01JH-13a 2.5M 5-1		6.32254	0.125459	0.273732	6.598	0.265	2.71655	1.82386	1.48945	11:41	-2226	-2963	-8	-15	-1826420	-51742	0.000821539	1.86968e-05
338	4	01JH-13a 2.5M 5-1 2		6.34253	0.125459	0.273732	6.618	0.184	2.69577	1.80986	1.48949	11:44	-2223	-2946	-8	-15	-1826420	-51742	0.000866359	6.35171e-05
339	4	01JH-13a 2.5M 5-1 3		6.12759	0.125459	0.273732	6.403	0.209	2.66663	1.79605	1.48472	11:48	-2226	-2999	-8	-15	-1826420	-51742	0.000851465	4.86231e-05
299	1	2.5M_5-5.1		6.406	0.332486		7.883	0.251	2.10124	2.12834	0.987267	06:55	-5387	-2569							4021
300	1	2.5M_5-5.2		6.718	0.332486		8.195	0.272	2.09905	2.14571	0.978255	06:58	-5467	-2697
301	1	2.5M_5-5.3 cycle 5 no counts							1.99165	2.15408	0.924595	07:01	-5518	-2610
344	4	01JH-13a 2.5M 5-5		6.35807	0.119355	0.34176	6.702	0.192	2.87188	1.93077	1.48743	12:10	-3845	-3020	-13	-13	-1826420	-51742	0.000827728	-1.65862e-05
345	4	01JH-13a 2.5M 5-5 2		6.18912	0.119355	0.34176	6.533	0.217	2.89327	1.93574	1.49466	12:14	-3822	-3025	-14	-13	-1826420	-51742	0.000851491	7.1768e-06
302	1	2.5M_6-3.1		6.753	0.332486		8.23	0.225	2.10963	2.11465	0.997624	07:06	-6606	-2925							3915
303	1	2.5M_6-3.2		7	0.332486		8.477	0.248	2.11129	2.13519	0.98881	07:09	-6662	-2851
304	1	2.5M_6-3.3		6.414	0.332486		7.891	0.354	2.0885	2.13937	0.976219	07:13	-6636	-2987
346	4	01JH-13a 2.5M 6-3		6.38006	0.119355	0.34176	6.724	0.231	2.85629	1.92549	1.48341	12:19	-5125	-3431	-18	-9	-1826420	-51742	0.00080355	-4.07642e-05
347	4	01JH-13a 2.5M 6-3 2		6.32208	0.119355	0.34176	6.666	0.184	2.83269	1.91504	1.47918	12:22	-5121	-3464	-17	-9	-1826420	-51742	0.000822983	-2.13306e-05
348	4	01JH-13a 2.5M 6-3 3		6.38306	0.119355	0.34176	6.727	0.245	2.84117	1.90886	1.48841	12:26	-5094	-3434	-18	-9	-1826420	-51742	0.000857804	1.34901e-05
305	1	2.5M_6-6.1		5.096	0.332486		6.573	0.188	2.08534	2.11751	0.984808	07:17	-1997	-2921							3746
306	1	2.5M_6-6.2		5.074	0.332486		6.551	0.335	2.09592	2.13155	0.983284	07:20	-1863	-2982
307	1	2.5M_6-6.3		5.033	0.332486		6.51	0.252	2.0778	2.13151	0.974804	07:24	-1917	-2946
349	4	01JH-13a 2.5M 6-6		5.10549	0.119355	0.34176	5.449	0.245	2.80854	1.89584	1.48143	12:31	-489	-3340	-15	-17	-1826420	-51742	0.000803384	-4.09295e-05
308	1	2.5M_7-2.1		6.392	0.332486		7.869	0.364	2.11088	2.12138	0.995049	07:28	-6919	-3290							4058
309	1	2.5M_7-2.2		6.499	0.332486		7.976	0.209	2.10088	2.12752	0.987478	07:31	-7017	-3368
310	1	2.5M_7-2.3		6.311	0.332486		7.788	0.29	2.0938	2.13933	0.978717	07:34	-6854	-3270
350	4	01JH-13a 2.5M 7-2		6.21012	0.119355	0.34176	6.554	0.235	2.81154	1.88422	1.49215	12:36	-5429	-3755	-17	-7	-1826420	-51742	0.000803529	-4.07849e-05
351	4	01JH-13a 2.5M 7-2 2, SE unusually high				0.34176	7.143	1.077	2.78174	1.88645	1.47459	12:40	-5444	-3784	-17	-7	-1826420	-51742	0.000840152
311	1	2.5M_7-6.1		6.1	0.332486		7.577	0.278	2.0304	2.13417	0.951378	07:37	-5770	-3240							3922
312	1	2.5M_7-6.2		6.031	0.332486		7.508	0.298	2.08061	2.12732	0.978039	07:41	-5593	-3260
313	1	2.5M_7-6.3		6.308	0.332486		7.785	0.296	2.09354	2.14043	0.978093	07:44	-5886	-3307
111	2	01JH-13a 2.5M 7-6 zrc		6.4392	0.139146	1.24379	7.691	0.168	2.74203	1.87812	1.45999	10:29	-3878	-2756	-10	-8	-2635140	-51733	0.000794596	7.40175e-05
351	4	01JH-13a 2.5M 7-6		6.33907	0.119355	0.34176	6.683	0.276	2.78882	1.87777	1.48518	12:45	-4280	-3650	-20	-10	-1826420	-51742	0.000828186	-1.61274e-05
352	4	01JH-13a 2.5M 7-6 2		6.22311	0.119355	0.34176	6.567	0.251	2.78005	1.87252	1.48466	12:49	-4258	-3688	-19	-10	-1826420	-51742	0.000836572	-7.7417e-06
353	4	01JH-13a 2.5M 7-6 3		6.61298	0.119355	0.34176	6.957	0.239	2.75945	1.86947	1.47606	12:52	-4266	-3654	-19	-10	-1826420	-51742	0.000870081	2.57673e-05
314	1	2.5M_10-1.1 low value		4.294	0.332486		5.771	0.221	2.07728	2.12271	0.978601	07:48	-3622	-4283							4071
315	1	2.5M_10-1.2		5.701	0.332486		7.178	0.311	2.02592	2.12635	0.952772	07:51	-3647	-4307
316	1	2.5M_10-1.3		5.766	0.332486		7.243	0.277	2.06149	2.13292	0.96651	07:54	-3634	-4252
317	1	2.5M_10-1.4		5.722	0.332486		7.199	0.274	2.08369	2.12944	0.978515	07:58	-3543	-4220
318	1	2.5M_10-1.5		5.352	0.332486		6.829	0.228	2.04515	2.12998	0.960173	08:01	-3584	-4302
113	2	01JH-13a 2.5M 10-1 zrc		5.8779	0.139146	1.24379	7.129	0.223	2.73263	1.89443	1.44245	10:40	-1757	-3711	-19	-12	-2635140	-51733	0.000746742	2.61634e-05
359	4	01JH-13a 2.5M 10-1		5.55772	0.17	0.41	5.97	0.29	2.66664	1.80165	1.48012	13:18	-2120	-4697	-15	-16	-1826420	-51742	0.000803757	-2.56935e-05
360	4	01JH-13a 2.5M 10-1 2, oEE CL					4.761	0.286	2.68263	1.80349	1.48747	13:22	-2148	-4686	-14	-17	-1826420	-51742	0.000843211
324	1	2.5M_10-2.1		6.82989	0.21089		8.361	0.244	2.08291	2.12419	0.980566	08:20	-3981	-4219							4010
325	1	2.5M_10-2.2		6.51189	0.21089		8.043	0.302	2.03584	2.13069	0.955486	08:24	-4096	-4310
326	1	2.5M_10-2.3		6.94189	0.21089		8.473	0.285	2.07309	2.13237	0.972199	08:27	-4080	-4168
361	4	01JH-13a 2.5M 10-2		6.66898	0.172729	0.410287	7.082	0.332	2.66542	1.79547	1.48453	13:26	-2488	-4657	-14	-16	-1826420	-51742	0.000800177	-2.92735e-05
362	4	01JH-13a 2.5M 10-2 2 Cs-Res=159		6.43807	0.172729	0.410287	6.851	0.277	2.87896	1.92514	1.49546	13:32	-2491	-4638	-14	-16	-1826420	-51742	0.000800238	-2.92129e-05
363	4	01JH-13a 2.5M 10-2 3		6.603	0.172729	0.410287	7.016	0.211	2.90896	1.97489	1.47297	13:36	-2453	-4667	-14	-17	-1826420	-51742	0.000792046	-3.7405e-05
327	1	2.5M_10-3.1		5.02489	0.21089		6.556	0.344	2.01846	2.11782	0.953084	08:31	-3297	-4108							4143
328	1	2.5M_10-3.2		5.79289	0.21089		7.324	0.199	2.07762	2.13018	0.975324	08:34	-3355	-4165
364	4	01JH-13a 2.5M 10-3		5.36351	0.172729	0.410287	5.776	0.242	2.90984	1.97919	1.47021	13:40	-1767	-4542	-15	-17	-1826420	-51742	0.000828639	-8.11838e-07
365	4	01JH-13a 2.5M 10-3 2		5.18659	0.172729	0.410287	5.599	0.321	2.94095	1.98189	1.48391	13:43	-1765	-4528	-15	-18	-1826420	-51742	0.000908433	7.89817e-05
329	1	5M_3-2.1		6.44389	0.21089		7.975	0.184	2.05541	2.10155	0.978046	08:41	-200	-1678							3957
330	1	5M_3-2.2		6.68989	0.21089		8.221	0.26	2.06248	2.12717	0.969588	08:44	59	-1770
331	1	5M_3-2.3		6.28589	0.21089		7.817	0.203	2.05078	2.12498	0.965086	08:48	133	-1864
366	4	01JH-13a 5M 3-2		6.42808	0.172729	0.410287	6.841	0.266	2.96488	1.99374	1.48709	13:49	1258	-2063	-11	-17	-1826420	-51742	0.000782135	-4.73157e-05
367	4	01JH-13a 5M 3-2 2		6.49305	0.172729	0.410287	6.906	0.249	2.95952	1.99441	1.48391	13:52	1273	-2046	-11	-17	-1826420	-51742	0.000824865	-4.58554e-06
368	4	01JH-13a 5M 3-2 3		6.54103	0.172729	0.410287	6.954	0.259	2.95021	1.98604	1.48547	13:55	1313	-2074	-11	-18	-1826420	-51742	0.000818756	-1.06949e-05
332	1	5M_7-1.1		5.54889	0.21089		7.08	0.252	2.07062	2.11997	0.97672	08:52	1950	-3300							3836
333	1	5M_7-1.2		5.84389	0.21089		7.375	0.194	2.03752	2.12224	0.96008	08:55	2114	-3258
369	4	01JH-13a 5M 7-1		6.01624	0.172729	0.410287	6.429	0.227	2.92792	1.96452	1.49039	14:00	3471	-3650	-13	-15	-1826420	-51742	0.000770277	-5.91737e-05
370	4	01JH-13a 5M 7-1 2		5.59342	0.172729	0.410287	6.006	0.301	2.9172	1.9578	1.49004	14:04	3475	-3662	-13	-15	-1826420	-51742	0.000762343	-6.71084e-05
342	1	10/20M 3-2.1		5.95489	0.21089		7.486	0.325	1.92375	2.11313	0.910382	09:30	2463	4501							4085
343	1	10/20M 3-2.2		6.13589	0.21089		7.667	0.159	2.0717	2.12873	0.97321	09:33	2525	4595
371	4	01JH-13a 10M 3-2		5.71637	0.172729	0.410287	6.129	0.219	2.90181	1.94442	1.49238	14:10	3923	4254	-12	-16	-1826420	-51742	0.000795424	-3.40266e-05
372	4	01JH-13a 10M 3-2 2		5.80133	0.172729	0.410287	6.214	0.231	2.87283	1.93452	1.48503	14:13	3951	4228	-12	-17	-1826420	-51742	0.00084942	1.99687e-05
373	4	01JH-13a 10M 3-2 3		6.1302	0.172729	0.410287	6.543	0.284	2.86404	1.93006	1.48391	14:17	3939	4254	-11	-16	-1826420	-51742	0.000829462	1.10625e-08
340	1	10/20M 4-1.1		6.41489	0.21089		7.946	0.244	2.06507	2.11997	0.974103	09:23	562	4170							4094
341	1	10/20M 4-1.2		6.57889	0.21089		8.11	0.214	2.06901	2.12787	0.972337	09:26	369	4167
115	2	01JH-13a 10M 4-1 zrc		6.30436	0.139146	1.24379	7.556	0.2	2.70221	1.85132	1.45961	10:54	2164	4752	-9	-16	-2635140	-51733	0.000816154	9.55754e-05
378	4	01JH-13a 10M 4-1		6.22444	0.168289	0.497468	6.725	0.299	2.82063	1.90065	1.48404	14:37	1779	3802	-13	-15	-1826420	-51742	0.000785009	1.29759e-05
379	4	01JH-13a 10M 4-1 2		6.25442	0.168289	0.497468	6.755	0.222	2.8107	1.89455	1.48357	14:40	1780	3767	-13	-15	-1826420	-51742	0.000950036	0.000178003
338	1	10/20M 6-1.1		5.53989	0.21089		7.071	0.283	2.07312	2.11156	0.981796	09:16	956	3508							4134
339	1	10/20M 6-1.2		5.65589	0.21089		7.187	0.221	2.07447	2.12396	0.976698	09:19	1036	3540
380	4	01JH-13a 10M 6-1		5.66871	0.168289	0.497468	6.169	0.286	2.8121	1.88547	1.49146	14:45	2355	3144	-13	-17	-1826420	-51742	0.000733478	-3.85552e-05
381	4	01JH-13a 10M 6-1 2		5.34587	0.168289	0.497468	5.846	0.226	2.80619	1.88262	1.49058	14:49	2376	3152	-14	-17	-1826420	-51742	0.000771879	-1.53612e-07
382	4	01JH-13a 10M 6-1 3		5.53778	0.168289	0.497468	6.038	0.25	2.79341	1.8773	1.488	14:52	2391	3121	-14	-18	-1826420	-51742	0.000766487	-5.54571e-06
336	1	10/20M 9-2.1		6.42889	0.21089		7.96	0.249	2.07156	2.11442	0.97973	09:08	1359	1878							3815
337	1	10/20M 9-2.2		6.27489	0.21089		7.806	0.249	2.06375	2.1195	0.973696	09:12	1166	1948
117	2	01JH-13a 10M 9-2 zrc		6.32434	0.139146	1.24379	7.576	0.194	2.73247	1.86963	1.46151	11:04	2962	2586	-11	-14	-2635140	-51733	0.000886951	0.000166373
383	4	01JH-13a 10M 9-2		6.02254	0.168289	0.497468	6.523	0.263	2.8004	1.87425	1.49415	14:57	2799	1487	-14	-17	-1826420	-51742	0.000782853	1.08203e-05
384	4	01JH-13a 10M 9-2 2		6.24742	0.168289	0.497468	6.748	0.215	2.79049	1.87914	1.48498	15:00	2816	1495	-14	-17	-1826420	-51742	0.000845712	7.36795e-05
334	1	10/20M 11-1.1		6.05989	0.21089		7.591	0.252	2.05873	2.10472	0.978154	09:01	-664	1196							3914
335	1	10/20M 11-1.2		6.61689	0.21089		8.148	0.172	2.06511	2.12439	0.972095	09:04	-701	976
385	4	01JH-13a 10M 11-1		6.1045	0.168289	0.497468	6.605	0.291	2.80014	1.86619	1.50046	15:04	790	786	-6	-18	-1826420	-51742	0.00081301	4.09777e-05
386	4	01JH-13a 10M 11-1 2		6.1045	0.168289	0.497468	6.605	0.224	2.73827	1.83896	1.48903	15:08	768	780	-7	-18	-1826420	-51742	0.000887594	0.000115562
387	4	01JH-13a 10M 11-1 3		6.35337	0.168289	0.497468	6.854	0.344	2.75051	1.83779	1.49664	15:11	767	797	-6	-18	-1826420	-51742	0.000867223	9.51903e-05
Mount: 01JH-13b
14	1	2.5NM 1-1.1		6.72363	0.292612		7.973	0.235	2.27673	2.29998	0.989893	12:18	-4943	4575							4079
15	1	2.5NM 1-1.2		6.80863	0.292612		8.058	0.214	2.28089	2.32545	0.980842	12:22	-4915	4587
16	1	2.5NM 1-1.3		6.43663	0.292612		7.686	0.246	2.26677	2.31887	0.977529	12:25	-4946	4600
439	4	01JH-13b 2.5NM 1-1		6.14138	0.300125	0.354446	6.498	0.208	2.89516	1.96257	1.47519	19:06	-3360	5781	-23	3	-1826420	-51742	0.000737212	2.87114e-05		01JH-13b 2.5NM 1-1_LR-3	1005.4	5.10634	0.83	4.9591	0.147242	0.272965	4.8491	0.266452	0.272965	0.261129	0.0118356	4.44193		2.5NM 1-1-2	3	core	104	35	0.33	0.04	3e-05	0.44818	0.00443	0.2228	0.0027	0.0848	0.0005
																						01JH-13b 2.5NM 1-1_LR-4	1005.45	4.9829	0.83	4.83208	0.150823	0.265263
																						01JH-13b 2.5NM 1-1_LR-5	1005.54	4.90918	0.83	4.75613	0.153046	0.261129
440	4	01JH-13b 2.5NM 1-1 2		6.14338	0.300125	0.354446	6.5	0.184	2.92453	1.96554	1.4879	19:10	-3344	5795	-23	4	-1826420	-51742	0.00077118	6.26788e-05		01JH-13b 2.5NM 1-1_LR-1	1004.62	8.07448	0.83	7.98075	0.0937275	0.461715	6.65582	0.378295	0.461715	0.272965	0.18875	49.8949		2.5NM 1-1-2	3	core	104	35	0.33	0.04	3e-05	0.44818	0.00443	0.2228	0.0027	0.0848	0.0005
																						01JH-13b 2.5NM 1-1_LR-2	1005	7.13353	0.83	7.0276	0.105933	0.400205
																						01JH-13b 2.5NM 1-1_LR-3	1005.4	5.10634	0.83	4.9591	0.147242	0.272965
441	4	01JH-13b 2.5NM 1-1 3		6.3623	0.300125	0.354446	6.719	0.252	2.86299	1.9623	1.459	19:13	-3348	5767	-23	1	-1826420	-51742	0.000797568	8.90671e-05		01JH-13b 2.5NM 1-1_LR-3	1005.4	5.10634	0.83	4.9591	0.147242	0.272965	4.8491	0.266452	0.272965	0.261129	0.0118356	4.44193		2.5NM 1-1-2	3	core	104	35	0.33	0.04	3e-05	0.44818	0.00443	0.2228	0.0027	0.0848	0.0005
																						01JH-13b 2.5NM 1-1_LR-4	1005.45	4.9829	0.83	4.83208	0.150823	0.265263
																						01JH-13b 2.5NM 1-1_LR-5	1005.54	4.90918	0.83	4.75613	0.153046	0.261129
6	1	2.5NM 1-2.1		7.06356	0.314077		8.405	0.197	2.27662	2.31516	0.983355	11:51	-3775	4588							4037
7	1	2.5NM 1-2.2		6.93856	0.314077		8.28	0.213	2.25848	2.32486	0.971448	11:54	-3740	4582
8	1	2.5NM 1-2.3		6.89456	0.314077		8.236	0.224	2.26153	2.32889	0.971076	11:57	-3714	4579
9	1	2.5NM 1-2.4		7.11856	0.314077		8.46	0.21	2.26836	2.3285	0.974174	12:00	-3805	4600
442	4	01JH-13b 2.5NM 1-2 high OH/O + crack				0.354446	7.196	0.21	2.88436	1.95615	1.47451	19:17	-2216	5648	-24	5	-1826420	-51742	0.00171292			01JH-13b 2.5NM 1-2_LR-4	1005.56	5.68794	0.83	5.55551	0.132426	0.30894	6.03699	0.338305	0.381834	0.30894	0.0728942	21.5469
																						01JH-13b 2.5NM 1-2_LR-5	1004.81	6.85118	0.83	6.74094	0.110241	0.381834
																						01JH-13b 2.5NM 1-2_LR-6	1005.42	5.94139	0.83	5.81453	0.126863	0.324142
443	4	01JH-13b 2.5NM 1-2 2		7.195	0.300125	0.354446	7.552	0.197	2.85332	1.95119	1.46235	19:20	-2169	5635	-23	5	-1826420	-51742	0.000768125	5.9624e-05		01JH-13b 2.5NM 1-2_LR-1	1005.55	5.7232	0.83	5.59158	0.131623	0.310758	5.91393	0.330555	0.354932	0.310758	0.0441745	13.3637		2.5NM 1-2-2	3	core	85	39	0.46	0	0	0.43553	0.00128	0.2243	0.0025	0.1209	0.0008
																						01JH-13b 2.5NM 1-2_LR-2	1005.39	5.96257	0.83	5.83615	0.12642	0.325975
																						01JH-13b 2.5NM 1-2_LR-3	1005.03	6.43139	0.83	6.31406	0.117334	0.354932
17	1	2.5NM 2-1.1		6.09863	0.292612		7.348	0.207	2.25402	2.30331	0.978602	12:29	-4339	4426							3965
18	1	2.5NM 2-1.2		6.50762	0.292612		7.757	0.191	2.28594	2.31872	0.985865	12:32	-4257	4440
19	1	2.5NM 2-1.3		6.32163	0.292612		7.571	0.212	2.26873	2.30061	0.986143	12:36	-4260	4416
444	4	01JH-13b 2.5NM 2-1		6.26233	0.300125	0.354446	6.619	0.238	2.89155	1.93984	1.49061	19:24	-2727	5556	-23	5	-1826420	-51742	0.000762905	5.44046e-05		01JH-13b 2.5NM 2-1_LR-5	1003.82	9.46143	0.83	9.38131	0.0801206	0.556324	7.46075	0.430058	0.556324	0.34317	0.213153	49.5638		2.5NM 2-1-2	3	core	52	18	0.34	0.21	0.00013	0.41527	0.00163	0.2083	0.0043	0.0852	0.0008
																						01JH-13b 2.5NM 2-1_LR-6	1004.48	6.99041	0.83	6.88234	0.108073	0.39068
																						01JH-13b 2.5NM 2-1_LR-7	1004.66	6.2395	0.83	6.11861	0.12089	0.34317
445	4	01JH-13b 2.5NM 2-1 2		6.30632	0.300125	0.354446	6.663	0.261	2.86948	1.93159	1.48555	19:28	-2689	5560	-23	5	-1826420	-51742	0.000728334	1.98337e-05		01JH-13b 2.5NM 2-1_LR-2	1005.42	5.72616	0.83	5.5946	0.131556	0.310758	5.72481	0.318867	0.323532	0.310758	0.0127739	4.00604
																						01JH-13b 2.5NM 2-1_LR-3	1005.37	5.90519	0.83	5.77756	0.127629	0.322311
																						01JH-13b 2.5NM 2-1_LR-4	1005.36	5.92938	0.83	5.80226	0.127116	0.323532
446	4	01JH-13b 2.5NM 2-1 3		6.53624	0.300125	0.354446	6.893	0.206	2.84673	1.92619	1.47791	19:31	-2688	5543	-23	4	-1826420	-51742	0.000744046	3.55451e-05		01JH-13b 2.5NM 2-1_LR-1	1005.21	6.5199	0.83	6.40414	0.115764	0.36053	5.99937	0.335644	0.36053	0.310758	0.0497724	14.8289
																						01JH-13b 2.5NM 2-1_LR-2	1005.42	5.72616	0.83	5.5946	0.131556	0.310758
20	1	2.5NM 3-1.1		6.63463	0.292612		7.884	0.183	2.26631	2.29724	0.986534	12:40	-5292	4216							4115
21	1	2.5NM 3-1.2		6.64363	0.292612		7.893	0.206	2.27924	2.30487	0.988878	12:44	-5410	4231
447	4	01JH-13b 2.5NM 3-1		6.29032	0.300125	0.354446	6.647	0.192	2.80867	1.91289	1.46829	19:35	-3738	5468	-23	2	-1826420	-51742	0.000904687	0.000196186		01JH-13b 2.5NM 3-1_LR-4	1004.8	7.39827	0.83	7.29608	0.102189	0.417476	7.85319	0.458016	0.676009	0.334552	0.341456	74.5511		2.5NM 3-1-2	3	core	86	55	0.63	0	0	0.45908	0.00286	0.2305	0.0032	0.1677	0.0018
																						01JH-13b 2.5NM 3-1_LR-5	1004.99	11.1214	0.83	11.0531	0.0682602	0.676009
																						01JH-13b 2.5NM 3-1_LR-6	1004.04	7.19232	0.83	7.08724	0.105078	0.404029
																						01JH-13b 2.5NM 3-1_LR-7	1003.97	6.09992	0.83	5.9763	0.123615	0.334552
448	4	01JH-13b 2.5NM 3-1 2		6.39429	0.300125	0.354446	6.751	0.254	2.81441	1.90992	1.47357	19:38	-3732	5491	-23	3	-1826420	-51742	0.000761026	5.25255e-05		01JH-13b 2.5NM 3-1_LR-1	1005.93	4.46013	0.83	4.29199	0.168143	0.233614	4.63279	0.25375	0.274747	0.233614	0.0411322	16.2097
																						01JH-13b 2.5NM 3-1_LR-2	1005.63	4.77582	0.83	4.61858	0.157239	0.25289
																						01JH-13b 2.5NM 3-1_LR-3	1005.56	5.13426	0.83	4.98781	0.146455	0.274747
22	1	2.5NM 4-2.1 core		7.28863	0.292612		8.538	0.215	2.26176	2.29568	0.985226	12:48	-5861	3993							3805
23	1	2.5NM 4-2.2 core		7.07163	0.292612		8.321	0.236	2.21689	2.29924	0.964184	12:51	-5827	4012
24	1	2.5NM 4-2.3 rim		6.55962	0.292612		7.809	0.237	2.24681	2.30694	0.973932	12:55	-5924	3963
449	4	01JH-13b 2.5NM 4-2		6.88911	0.300125	0.354446	7.246	0.272	2.82357	1.90503	1.48217	19:43	-4367	5299	-22	0	-1826420	-51742	0.000803972	9.54715e-05		01JH-13b 2.5NM 4-2_LR-6	1005.25	7.40404	0.83	7.30193	0.10211	0.417476	9.61944	0.576637	0.675268	0.417476	0.257792	44.7061
																						01JH-13b 2.5NM 4-2_LR-7	1003.93	11.1041	0.83	11.0357	0.0683657	0.675268
																						01JH-13b 2.5NM 4-2_LR-8	1003.5	10.5923	0.83	10.5207	0.0716405	0.637166
450	4	01JH-13b 2.5NM 4-2 2		6.83713	0.300125	0.354446	7.194	0.314	2.81136	1.90237	1.47782	19:46	-4382	5312	-23	1	-1826420	-51742	0.000750277	4.17761e-05		01JH-13b 2.5NM 4-2_LR-4	1007.49	3.59937	0.83	3.39202	0.207348	0.182059	4.80902	0.266967	0.417476	0.182059	0.235417	88.1821		2.5NM 4-2-2	3	core	45	19	0.42	0.08	5e-05	0.37330	0.00462	0.2046	0.0033	0.1120	0.0010
																						01JH-13b 2.5NM 4-2_LR-5	1007.14	3.92372	0.83	3.73312	0.190601	0.201365
																						01JH-13b 2.5NM 4-2_LR-6	1005.25	7.40404	0.83	7.30193	0.10211	0.417476
451	4	01JH-13b 2.5NM 4-2 3		7.47291	0.300125	0.354446	7.83	0.238	2.81726	1.89998	1.48278	19:49	-4357	5329	-22	2	-1826420	-51742	0.00072106	1.25594e-05		01JH-13b 2.5NM 4-2_LR-1	1007.13	3.70388	0.83	3.50224	0.20164	0.188283	3.45385	0.185641	0.188283	0.183755	0.00452826	2.43926
																						01JH-13b 2.5NM 4-2_LR-2	1006.91	3.6456	0.83	3.44082	0.204784	0.184886
																						01JH-13b 2.5NM 4-2_LR-3	1007	3.62445	0.83	3.4185	0.205949	0.183755
25	1	2.5NM 6-4.1		7.03362	0.292612		8.283	0.202	2.25033	2.29376	0.981066	12:59	-2144	3820							4013
26	1	2.5NM 6-4.2		6.61763	0.292612		7.867	0.281	2.24674	2.30819	0.973377	13:02	-2198	3838
452	4	01JH-13b 2.5NM 6-4		6.73517	0.300125	0.354446	7.092	0.337	2.7617	1.87913	1.46966	19:54	-662	4659	-26	3	-1826420	-51742	0.000824671	0.000116171		01JH-13b 2.5NM 6-4_LR-1	1005.35	6.47862	0.83	6.36213	0.116491	0.35804	5.86558	0.327733	0.35804	0.309546	0.0484942	14.7969		2.5NM 6-4-2	3	core	82	51	0.62	0.09	5e-05	0.42883	0.00130	0.2180	0.0025	0.1623	0.0011
																						01JH-13b 2.5NM 6-4_LR-2	1005.47	5.70086	0.83	5.56873	0.132131	0.309546
																						01JH-13b 2.5NM 6-4_LR-3	1005.56	5.79589	0.83	5.66589	0.129998	0.315613
453	4	01JH-13b 2.5NM 6-4 2		6.68918	0.300125	0.354446	7.046	0.221	2.7502	1.8701	1.47062	19:57	-684	4646	-26	4	-1826420	-51742	0.000791923	8.34221e-05		01JH-13b 2.5NM 6-4_LR-4	1005.69	5.35418	0.83	5.21364	0.140541	0.287868	5.07783	0.279913	0.287868	0.275936	0.0119325	4.26294		2.5NM 6-4-2	3	core	82	51	0.62	0.09	5e-05	0.42883	0.00130	0.2180	0.0025	0.1623	0.0011
																						01JH-13b 2.5NM 6-4_LR-5	1005.8	5.15747	0.83	5.01166	0.145807	0.275936
																						01JH-13b 2.5NM 6-4_LR-6	1005.87	5.1541	0.83	5.0082	0.145901	0.275936
31	1	2.5nm 7-1.1 core		7.59763	0.282021		8.797	0.257	2.25592	2.2911	0.984646	13:21	-2771	3630							4121
32	1	2.5nm 7-1.2 rim		8.37663	0.282021		9.576	0.299	2.25419	2.31015	0.975774	13:24	-2705	3673
33	1	2.5nm 7-1.3 rim		8.23762	0.282021		9.437	0.14	2.24061	2.30976	0.970063	13:27	-2853	3636
34	1	2.5nm 7-1.4 core		7.47762	0.282021		8.677	0.275	2.23407	2.28903	0.975991	13:31	-2802	3613
35	1	2.5nm 7-1.5 core		7.53463	0.282021		8.734	0.274	2.23313	2.29458	0.973217	13:34	-2797	3648
466	4	01JH-13b 2.5NM 7-1		8.10846	0.209465	0.344745	8.456	0.27	2.86295	1.92146	1.48999	08:40	-1281	4599	-18	13	-1836628	-52499	0.000595205	7.09458e-05		01JH-13b 2.5NM 7-2_LR-2	1003.5	7.6224	0.83	7.52318	0.09922	0.431671	9.40093	0.562399	0.693126	0.431671	0.261455	46.4892		2.5NM 7-1-2	3	rim	39	15	0.38	0.15	9e-05	0.46091	0.00218	0.2197	0.0047	0.0991	0.0011
																						01JH-13b 2.5NM 7-2_LR-3	1001.58	11.3456	0.83	11.2787	0.0669222	0.693126
467	4	01JH-13b 2.5NM 7-1 2		7.93952	0.209465	0.344745	8.287	0.174	2.85033	1.90167	1.49886	08:44	-1284	4613	-18	14	-1836628	-52499	0.000611103	8.68436e-05		01JH-13b 2.5NM 7-2_LR-3	1001.58	11.3456	0.83	11.2787	0.0669222	0.693126	11.0057	0.672792	0.693126	0.652458	0.0406683	6.0447
																						01JH-13b 2.5NM 7-2_LR-4	1002.44	10.803	0.83	10.7327	0.0702551	0.652458
468	4	01JH-13b 2.5NM 7-1 3		8.07547	0.209465	0.344745	8.423	0.231	2.80254	1.88891	1.48368	08:47	-1263	4587	-18	13	-1836628	-52499	0.000608012	8.37527e-05		01JH-13b 2.5NM 7-1_LR-1	1005.75	5.73964	0.83	5.60839	0.131252	0.31197	5.55235	0.30864	0.31197	0.30531	0.00665995	2.15783		2.5NM 7-1-2	3	rim	39	15	0.38	0.15	9e-05	0.46091	0.00218	0.2197	0.0047	0.0991	0.0011
																						01JH-13b 2.5NM 7-1_LR-2	1005.69	5.63008	0.83	5.49631	0.133765	0.30531
39	1	2.5nm 7-5.1		6.33162	0.282021		7.531	0.253	2.19398	2.27205	0.965639	13:46	-3463	3641							4012
40	1	2.5nm 7-5.2		6.31062	0.282021		7.51	0.25	2.22365	2.28872	0.971573	13:50	-3555	3636
469	4	01JH-13b 2.5NM 7-5		6.47202	0.209465	0.344745	6.819	0.237	2.79485	1.8708	1.49393	08:51	-2029	4652	-17	12	-1836628	-52499	0.000630763	0.000106503		01JH-13b 2.5NM 7-5_LR-1	1006.51	4.66718	0.83	4.50635	0.160828	0.246442	4.44745	0.242952	0.250542	0.231872	0.0186702	7.68471		2.5NM 7-5-2	3	core	45	32	0.71	0.05	3e-05	0.42832	0.00202	0.2240	0.0033	0.1906	0.0016
																						01JH-13b 2.5NM 7-5_LR-2	1006.63	4.42774	0.83	4.25839	0.169348	0.231872
																						01JH-13b 2.5NM 7-5_LR-3	1006.76	4.73613	0.83	4.5776	0.158531	0.250542
470	4	01JH-13b 2.5NM 7-5 2		6.65196	0.209465	0.344745	6.999	0.213	2.77113	1.85872	1.49088	08:54	-2010	4647	-17	13	-1836628	-52499	0.00063884	0.000114581		01JH-13b 2.5NM 7-5_LR-1	1006.51	4.66718	0.83	4.50635	0.160828	0.246442	4.44745	0.242952	0.250542	0.231872	0.0186702	7.68471		2.5NM 7-5-2	3	core	45	32	0.71	0.05	3e-05	0.42832	0.00202	0.2240	0.0033	0.1906	0.0016
																						01JH-13b 2.5NM 7-5_LR-2	1006.63	4.42774	0.83	4.25839	0.169348	0.231872
																						01JH-13b 2.5NM 7-5_LR-3	1006.76	4.73613	0.83	4.5776	0.158531	0.250542
41	1	2.5nm 8-1.1 core		6.84463	0.282021		8.044	0.203	2.23521	2.28457	0.978392	13:53	-4204	3307							4133
42	1	2.5nm 8-1.2 rim		6.56862	0.282021		7.768	0.189	2.23899	2.29419	0.97594	13:57	-4319	3328
471	4	01JH-13b 2.5NM 8-1		6.17513	0.209465	0.344745	6.522	0.209	2.72413	1.84937	1.473	08:58	-2764	4436	-19	15	-1836628	-52499	0.000700549	0.00017629		01JH-13b 2.5NM 8-1_LR-2	1002.49	9.67849	0.83	9.60015	0.0783407	0.571648	8.48286	0.495941	0.571648	0.416833	0.154815	31.2163
																						01JH-13b 2.5NM 8-1_LR-3	1003.33	8.50298	0.83	8.41393	0.0890548	0.490254
																						01JH-13b 2.5NM 8-1_LR-4	1004.03	7.38805	0.83	7.28572	0.102328	0.416833
																						01JH-13b 2.5NM 8-1_LR-5	1002.11	8.71854	0.83	8.63166	0.0868761	0.50503
472	4	01JH-13b 2.5NM 8-1 2		6.31108	0.209465	0.344745	6.658	0.275	2.71501	1.8331	1.48111	09:01	-2786	4445	-19	14	-1836628	-52499	0.000806978	0.000282718		01JH-13b 2.5NM 8-1_LR-1	1002.13	10.5447	0.83	10.4727	0.0719611	0.633544	10.0364	0.602596	0.633544	0.571648	0.0618962	10.2716		2.5NM 8-1-2	3	core	142	58	0.41	0.06	4e-05	0.46462	0.00232	0.2126	0.0023	0.0977	0.0005
																						01JH-13b 2.5NM 8-1_LR-2	1002.49	9.67849	0.83	9.60015	0.0783407	0.571648
473	4	01JH-13b 2.5NM 8-1 3, on crack				0.344745	5.811	0.241	2.69899	1.81624	1.48604	09:05	-2759	4420	-19	14	-1836628	-52499	0.00187259			01JH-13b 2.5NM 8-1_LR-5	1002.11	8.71854	0.83	8.63166	0.0868761	0.50503	9.27001	0.549246	0.593463	0.50503	0.0884327	16.1007
																						01JH-13b 2.5NM 8-1_LR-6	1001.71	9.98432	0.83	9.90836	0.075963	0.593463
43	1	2.5nm 11-1.1 core		6.38363	0.282021		7.583	0.259	2.23664	2.27647	0.982501	14:01	-5783	2621							4098
44	1	2.5nm 11-1.2 core		6.45263	0.282021		7.652	0.184	2.24002	2.30119	0.973418	14:04	-5779	2591
45	1	2.5nm 11-1.3 rim		6.84763	0.282021		8.047	0.225	2.25568	2.29791	0.981623	14:08	-5912	2574
474	4	01JH-13b 2.5NM 11-1		6.60098	0.209465	0.344745	6.948	0.202	2.68195	1.79148	1.49706	09:09	-4443	3977	-16	10	-1836628	-52499	0.000658061	0.000133801		01JH-13b 2.5NM 11-1_LR-1	1006.1	4.47981	0.83	4.31239	0.167419	0.234777	4.86483	0.267629	0.300482	0.234777	0.0657052	24.5508
																						01JH-13b 2.5NM 11-1_LR-2	1006.05	5.55287	0.83	5.41728	0.135595	0.300482
475	4	01JH-13b 2.5NM 11-1 2 Cs-Res=162		6.43404	0.209465	0.344745	6.781	0.212	2.8698	1.9125	1.50055	09:15	-4424	3951	-16	9	-1836628	-52499	0.000600608	7.63487e-05		01JH-13b 2.5NM 11-1_LR-3	1006.27	4.83342	0.83	4.67802	0.1554	0.256416	4.68574	0.256845	0.271184	0.242935	0.0282499	10.9988		2.5NM 11-1-2	3	core	104	78	0.75	0.03	2e-05	0.45394	0.00146	0.2306	0.0024	0.1940	0.0011
																						01JH-13b 2.5NM 11-1_LR-4	1005.83	5.07766	0.83	4.9296	0.148058	0.271184
																						01JH-13b 2.5NM 11-1_LR-5	1006.17	4.6123	0.83	4.4496	0.162704	0.242935
53	1	2.5nm 16-2.1		6.579	0.356819		7.703	0.234	2.2061	2.27405	0.97012	14:37	-5489	1449							4035
54	1	2.5nm 16-2.2		6.751	0.356819		7.875	0.235	2.24952	2.28257	0.985519	14:40	-5464	1488
476	4	01JH-13b 2.5NM 16-2		6.57999	0.209465	0.344745	6.927	0.205	2.9116	1.93785	1.50249	09:19	-4294	2788	-17	11	-1836628	-52499	0.000658151	0.000133892		01JH-13b 2.5NM 16-2_LR-3	1005.13	6.7174	0.83	6.60499	0.112406	0.373032	6.5513	0.369901	0.373032	0.36677	0.00626159	1.69277
																						01JH-13b 2.5NM 16-2_LR-4	1005.22	6.61179	0.83	6.49761	0.114177	0.36677
477	4	01JH-13b 2.5NM 16-2 2		6.39805	0.209465	0.344745	6.745	0.197	2.88395	1.9393	1.48711	09:23	-4254	2790	-17	11	-1836628	-52499	0.000690627	0.000166368		01JH-13b 2.5NM 16-2_LR-1	1005.25	6.52163	0.83	6.4059	0.115734	0.361153	6.45456	0.363962	0.36677	0.361153	0.00561708	1.54332
																						01JH-13b 2.5NM 16-2_LR-2	1005.08	6.6173	0.83	6.50322	0.114083	0.36677
55	1	2.5nm 17-1.1		7.353	0.356819		8.477	0.269	2.22294	2.27663	0.976419	14:45	-2005	1598							4010
56	1	2.5nm 17-1.2		6.835	0.356819		7.959	0.287	2.21056	2.28915	0.96567	14:48	-1979	1562
57	1	2.5nm 17-1.3		7.092	0.356819		8.216	0.214	2.22656	2.28023	0.976463	14:52	-2061	1530
478	4	01JH-13b 2.5NM 17-1		6.77092	0.209465	0.344745	7.118	0.275	2.8767	1.92494	1.49444	09:27	-785	2475	-24	13	-1836628	-52499	0.000655849	0.00013159		01JH-13b 2.5NM 17-1_LR-5	1005.66	6.18782	0.83	6.06593	0.121885	0.340088	5.77357	0.322095	0.340088	0.304102	0.0359858	11.1724		2.5NM 17-1-2	3	core	80	51	0.63	0.1	6e-05	0.42775	0.00129	0.2245	0.0026	0.1672	0.0009
																						01JH-13b 2.5NM 17-1_LR-6	1005.68	5.61532	0.83	5.48121	0.134111	0.304102
479	4	01JH-13b 2.5NM 17-1 2		6.80791	0.209465	0.344745	7.155	0.216	2.86304	1.91852	1.49232	09:31	-810	2482	-23	13	-1836628	-52499	0.000644608	0.000120349		01JH-13b 2.5NM 17-1_LR-3	1005.64	5.81743	0.83	5.68791	0.129524	0.316829	5.98576	0.33495	0.35307	0.316829	0.0362407	10.8197
																						01JH-13b 2.5NM 17-1_LR-4	1005.01	6.40149	0.83	6.28362	0.117875	0.35307
480	4	01JH-13b 2.5NM 17-1 3		6.85389	0.209465	0.344745	7.201	0.182	2.86085	1.90945	1.49826	09:34	-836	2485	-23	13	-1836628	-52499	0.000654536	0.000130276		01JH-13b 2.5NM 17-1_LR-1	1005.84	5.11995	0.83	4.97309	0.146857	0.273559	5.35534	0.296716	0.319873	0.273559	0.0463142	15.609
																						01JH-13b 2.5NM 17-1_LR-2	1005.66	5.86606	0.83	5.73759	0.128467	0.319873
58	1	2.5nm 18-1.1		6.442	0.356819		7.566	0.191	2.22709	2.27952	0.976996	14:56	-2546	1272							3925
59	1	2.5nm 18-1.2		6.927	0.356819		8.051	0.193	2.24828	2.29247	0.980725	14:59	-2574	1342
485	4	01JH-13b 2.5NM 18-1		6.69697	0.254994	0.328826	7.028	0.2	2.78256	1.84819	1.50556	09:53	-1431	2254	-22	14	-1836628	-52499	0.000751937	0.000188167		01JH-13b 2.5NM 18-1_LR-1	1003.83	7.8443	0.83	7.74785	0.0964458	0.446631	8.06766	0.467774	0.488916	0.446631	0.0422854	9.03971
																						01JH-13b 2.5NM 18-1_LR-2	1003.67	8.4768	0.83	8.38747	0.0893269	0.488916
486	4	01JH-13b 2.5NM 18-1 2		6.57301	0.254994	0.328826	6.904	0.227	2.74974	1.83885	1.49536	09:56	-1464	2252	-23	13	-1836628	-52499	0.000704077	0.000140307		01JH-13b 2.5NM 18-1_LR-3	1003.59	9.12197	0.83	9.0389	0.0830723	0.532891	8.06299	0.46846	0.532891	0.404029	0.128863	27.5078
																						01JH-13b 2.5NM 18-1_LR-4	1004.96	7.19217	0.83	7.08709	0.10508	0.404029
62	1	2.5nm 18-2.1		6.515	0.356819		7.639	0.226	2.22319	2.2832	0.973715	15:11	-1726	1373
63	1	2.5nm 18-2.2		6.234	0.356819		7.358	0.192	2.22362	2.29259	0.969918	15:14	-1679	1347
487	4	01JH-13b 2.5NM 18-2		5.9892	0.254994	0.328826	6.32	0.235	2.73895	1.82703	1.49913	10:00	-597	2214	-25	14	-1836628	-52499	0.000656068	9.22972e-05		01JH-13b 2.5NM 18-2_LR-5	1006.89	4.53129	0.83	4.36574	0.165555	0.238269	4.3753	0.23856	0.238851	0.238269	0.000582598	0.244215
	4																					01JH-13b 2.5NM 18-2_LR-6	1007.22	4.54977	0.83	4.38487	0.164896	0.238851
488		01JH-13b 2.5NM 18-2 2		5.96721	0.254994	0.328826	6.298	0.195	2.73459	1.82281	1.5002	10:03	-577	2216	-25	14	-1836628	-52499	0.000666227	0.000102456		01JH-13b 2.5NM 18-2_LR-3	1006.57	4.66004	0.83	4.49897	0.161069	0.245857	4.41604	0.240898	0.245857	0.23594	0.00991688	4.11662
																						01JH-13b 2.5NM 18-2_LR-4	1006.71	4.4998	0.83	4.33311	0.16669	0.23594
489	4	01JH-13b 2.5NM 18-2 3		6.0022	0.254994	0.328826	6.333	0.209	2.71009	1.81393	1.49405	10:07	-561	2212	-24	14	-1836628	-52499	0.000720152	0.000156382		01JH-13b 2.5NM 18-2_LR-1	1005.8	6.09748	0.83	5.97382	0.123664	0.333938	5.59718	0.311203	0.333938	0.288467	0.0454715	14.6115
																						01JH-13b 2.5NM 18-2_LR-2	1006.15	5.36091	0.83	5.22054	0.140368	0.288467
60	1	2.5nm 18-3.1		6.446	0.356819		7.57	0.277	2.23937	2.27808	0.983009	15:04	-2304	1336							4126
61	1	2.5nm 18-3.2		6.45	0.356819		7.574	0.17	2.21662	2.29001	0.967954	15:07	-2220	1334
490	4	01JH-13b 2.5NM 18-3		6.08417	0.254994	0.328826	6.415	0.253	2.69804	1.80388	1.49569	10:11	-1113	2250	-23	13	-1836628	-52499	0.0006945	0.000130729		01JH-13b 2.5NM 18-3_LR-3	1005.15	6.97679	0.83	6.86851	0.108282	0.390046	5.80357	0.324998	0.390046	0.25995	0.130097	40.0299
																						01JH-13b 2.5NM 18-3_LR-4	1005.98	4.89219	0.83	4.73862	0.153568	0.25995
491	4	01JH-13b 2.5NM 18-3 2		6.10317	0.254994	0.328826	6.434	0.297	2.68831	1.79425	1.49829	10:15	-1144	2247	-23	13	-1836628	-52499	0.000711465	0.000147694		01JH-13b 2.5NM 18-3_LR-1	1005.04	6.75815	0.83	6.64641	0.111738	0.376171	6.32524	0.355976	0.376171	0.335781	0.0403895	11.3461
																						01JH-13b 2.5NM 18-3_LR-2	1005.3	6.12714	0.83	6.00407	0.123074	0.335781
76	1	2.5nm 19-1.1		6.0055	0.297225		7.303	0.209	2.24161	2.2737	0.985891	16:08	-4350	883							4066
77	1	2.5nm 19-1.2		5.7565	0.297225		7.054	0.282	2.23625	2.29325	0.975141	16:11	-4481	856
492	4	01JH-13b 2.5NM 19-1 Cs-Res=163, on crack				0.328826	6.27	0.236	2.90789	1.91825	1.51591	10:20	-3219	2104	-19	11	-1836628	-52499	0.00092624			01JH-13b 2.5NM 19-1_LR-1	1005.5	6.10239	0.83	5.97882	0.123566	0.334552	5.70708	0.31812	0.334552	0.301688	0.0328645	10.3308
																						01JH-13b 2.5NM 19-1_LR-2	1005.88	5.57051	0.83	5.43534	0.135172	0.301688
493	4	01JH-13b 2.5NM 19-1 2		6.05518	0.254994	0.328826	6.386	0.195	2.92422	1.95768	1.49372	10:24	-3231	2055	-20	12	-1836628	-52499	0.000666736	0.000102966		01JH-13b 2.5NM 19-1_LR-5	1005.57	6.15455	0.83	6.03202	0.122534	0.337626	5.67487	0.316045	0.337626	0.294465	0.0431611	13.6566
																						01JH-13b 2.5NM 19-1_LR-6	1005.95	5.4557	0.83	5.31773	0.13797	0.294465
494	4	01JH-13b 2.5NM 19-1 3		5.91723	0.254994	0.328826	6.248	0.222	2.95114	1.97203	1.4965	10:27	-3251	2090	-20	12	-1836628	-52499	0.000648471	8.47004e-05		01JH-13b 2.5NM 19-1_LR-3	1005.68	5.96853	0.83	5.84223	0.126295	0.325975	5.47316	0.303635	0.325975	0.281296	0.0446792	14.7148
																						01JH-13b 2.5NM 19-1_LR-4	1005.96	5.24744	0.83	5.10409	0.143351	0.281296
68	1	2.5nm 19-2.1 core		7.065	0.350878		8.209	0.25	2.21892	2.27651	0.974704	15:32	-1625	1134							4010
69	1	2.5nm 19-2.2 rim		7.053	0.350878		8.197	0.152	2.21808	2.28613	0.970231	15:36	-1760	1183
495	4	01JH-13b 2.5NM 19-2		6.63999	0.254994	0.328826	6.971	0.226	2.95585	1.97868	1.49385	10:31	-506	1970	-25	13	-1836628	-52499	0.000697867	0.000134097		01JH-13b 2.5NM 19-2_LR-1	1005.03	7.04383	0.83	6.93657	0.107264	0.394484	6.93405	0.394166	0.394484	0.393849	0.000634556	0.160987
																						01JH-13b 2.5NM 19-2_LR-2	1004.95	7.03888	0.83	6.93154	0.107339	0.393849
496	4	01JH-13b 2.5NM 19-2 2		6.67698	0.254994	0.328826	7.008	0.243	2.95953	1.97947	1.49511	10:34	-583	1987	-25	13	-1836628	-52499	0.000701295	0.000137525		01JH-13b 2.5NM 19-2_LR-3	1005.33	6.57358	0.83	6.45875	0.114832	0.364272	6.38887	0.359912	0.364272	0.355553	0.00871828	2.42233		2.5NM 19-2-2	3	core	71	84	1.19	0.03	2e-05	0.42799	0.00142	0.2241	0.0024	0.3172	0.0015
																						01JH-13b 2.5NM 19-2_LR-4	1005.26	6.43623	0.83	6.31898	0.117247	0.355553
70	1	2.5nm 19-4.1		6.722	0.350878		7.866	0.231	2.22307	2.28707	0.972014	15:39	-3093	1004							4090
497	4	01JH-13b 2.5NM 19-4		6.58001	0.254994	0.328826	6.911	0.188	2.94768	1.97325	1.49382	10:39	-1965	2006	-23	14	-1836628	-52499	0.000683638	0.000119868		01JH-13b 2.5NM 19-4_LR-3	1003.89	9.9245	0.83	9.84808	0.0764167	0.58922	8.72606	0.512436	0.58922	0.454485	0.134735	26.2931
																						01JH-13b 2.5NM 19-4_LR-3b	1003.99	7.96833	0.83	7.87337	0.0949618	0.454485
																						01JH-13b 2.5NM 19-4_LR-4	1003.62	8.54535	0.83	8.45673	0.088618	0.493601
498	4	01JH-13b 2.5NM 19-4 2		6.35708	0.254994	0.328826	6.688	0.243	2.934	1.96926	1.4899	10:42	-1999	1997	-23	14	-1836628	-52499	0.000748688	0.000184918		01JH-13b 2.5NM 19-4_LR-5	1003.48	9.25249	0.83	9.17058	0.081912	0.541815	8.7465	0.513029	0.541815	0.484243	0.057572	11.222
																						01JH-13b 2.5NM 19-4_LR-6	1004.05	8.41242	0.83	8.32242	0.0900031	0.484243
499	4	01JH-13b 2.5NM 19-4 3		6.3041	0.254994	0.328826	6.635	0.226	2.92106	1.96159	1.48913	10:46	-1953	2008	-23	13	-1836628	-52499	0.000762041	0.00019827		01JH-13b 2.5NM 19-4_LR-1	1003.65	10.2648	0.83	10.1909	0.0739058	0.613393	9.26599	0.549176	0.613393	0.478917	0.134476	24.4868
																						01JH-13b 2.5NM 19-4_LR-1b	1003.75	8.86913	0.83	8.78371	0.0854162	0.515174
																						01JH-13b 2.5NM 19-4_LR-2	1003.6	8.33213	0.83	8.24127	0.0908609	0.478917
																						01JH-13b 2.5NM 19-4_LR-3	1003.89	9.9245	0.83	9.84808	0.0764167	0.58922
83	1	2.5nm 20-3.1		6.7485	0.297225		8.046	0.184	2.22969	2.27237	0.981219	16:34	-4815	673							4083
84	1	2.5nm 20-3.2 core		6.3155	0.297225		7.613	0.182	2.20924	2.27546	0.9709	16:37	-4705	635
504	4	01JH-13b 2.5NM 20-3		6.38572	0.254483	0.31328	6.701	0.211	2.8998	1.92349	1.50757	11:05	-3761	1956	-20	12	-1836628	-52499	0.000680779	0.000103709		01JH-13b 2.5NM 20-3_LR-1	1005.77	6.14018	0.83	6.01736	0.122817	0.337011	5.61827	0.312739	0.337011	0.288467	0.0485437	15.5221
																						01JH-13b 2.5NM 20-3_LR-2	1006.05	5.35958	0.83	5.21918	0.140402	0.288467
505	4	01JH-13b 2.5NM 20-3 2		6.40771	0.254483	0.31328	6.723	0.234	2.864	1.91497	1.49559	11:08	-3720	1912	-19	13	-1836628	-52499	0.000634582	5.75118e-05		01JH-13b 2.5NM 20-3_LR-3	1006.38	4.56229	0.83	4.39784	0.164452	0.240017	4.35458	0.237397	0.240017	0.234777	0.00524004	2.20729		2.5NM 20-3-2	3	core	41	19	0.45	0.1	6e-05	0.44935	0.00368	0.2260	0.0040	0.1183	0.0011
																						01JH-13b 2.5NM 20-3_LR-4	1006.43	4.47877	0.83	4.31131	0.167457	0.234777
78	1	2.5nm 20-2.1		8.0585	0.297225		9.356	0.263	2.20413	2.28782	0.963421	16:15	-4444	679							3875
79	1	2.5nm 20-2.2 rim?		8.2315	0.297225		9.529	0.253	2.22095	2.28727	0.971004	16:18	-4400	690
80	1	2.5nm 20-2.3		8.2145	0.297225		9.512	0.259	2.23753	2.29192	0.976266	16:21	-4470	674
81	1	2.5nm 20-2.4		8.1305	0.297225		9.428	0.334	2.21624	2.28496	0.969926	16:25	-4484	713
82	1	2.5nm 20-2.5		8.2645	0.297225		9.562	0.197	2.23384	2.27573	0.981592	16:29	-4418	664
506	4	(01JH-13b 2.5NM 20-2)		8.15616	0.254483	0.31328	8.472	0.189	2.86681	1.91051	1.50055	11:12	-3337	1859	-19	13	-1836628	-52499	0.000598789	2.17187e-05		01JH-13b 2.5NM 20-4_LR-1	1007.51	3.20687	0.83	2.97485	0.232017	0.158491	2.94141	0.15682	0.158491	0.155148	0.00334219	2.13123
																						01JH-13b 2.5NM 20-4_LR-2	1007.59	3.14446	0.83	2.90797	0.23649	0.155148
507	4	(01JH-13b 2.5NM 20-2 2)		8.07019	0.254483	0.31328	8.386	0.21	2.84235	1.90534	1.49178	11:16	-3382	1867	-20	13	-1836628	-52499	0.000642255	6.5185e-05		01JH-13b 2.5NM 20-4_LR-3	1007.48	3.05699	0.83	2.81393	0.243059	0.149592	2.86947	0.152927	0.156262	0.149592	0.00667011	4.36164		2.5NM 20-2-2	3	core	30	6	0.2	0	0	0.39111	0.00349	0.2200	0.0052	0.0549	0.0008
																						01JH-13b 2.5NM 20-4_LR-4	1007.57	3.16034	0.83	2.925	0.235336	0.156262
508	4	(01JH-13b 2.5NM 20-2 3, on crack)				0.31328	8.527	0.248	2.83813	1.89353	1.49886	11:19	-3395	1840	-20	12	-1836628	-52499	0.00110286			01JH-13b 2.5NM 20-4_LR-5	1007.26	3.56549	0.83	3.35622	0.209269	0.180366	3.34653	0.179802	0.180366	0.179237	0.00112821	0.627475
																						01JH-13b 2.5NM 20-4_LR-6	1007.07	3.54716	0.83	3.33684	0.210323	0.179237
85	1	2.5nm 22-6.1 rim		6.3905	0.297225		7.688	0.257	2.21185	2.26661	0.975838	16:41	-2050	487							4115
86	1	2.5nm 22-6.2		6.5135	0.297225		7.811	0.178	2.19911	2.27929	0.964825	16:45	-2178	452
509	4	01JH-13b 2.5NM 22-6, on crack				0.31328	6.264	0.237	2.83884	1.88156	1.50877	11:25	-1065	1386	-25	13	-1836628	-52499	0.000717358			01JH-13b 2.5NM 22-6_LR-3	1006.33	4.97715	0.83	4.82616	0.150994	0.265263	4.87402	0.267927	0.270591	0.265263	0.00532861	1.98883
																						01JH-13b 2.5NM 22-6_LR-4	1006.32	5.07016	0.83	4.92189	0.148273	0.270591
510	4	01JH-13b 2.5NM 22-6 2		6.36473	0.254483	0.31328	6.68	0.245	2.80734	1.87898	1.49408	11:28	-1099	1386	-25	13	-1836628	-52499	0.000664201	8.71306e-05		01JH-13b 2.5NM 22-6_LR-1	1005.96	4.92027	0.83	4.76756	0.152707	0.261719	4.71518	0.25848	0.261719	0.25524	0.00647905	2.5066
																						01JH-13b 2.5NM 22-6_LR-2	1006.14	4.81866	0.83	4.66279	0.155867	0.25524
87	1	2.5nm 23-2.1		6.0165	0.297225		7.314	0.256	2.2001	2.26724	0.970385	16:49	-2623	274							4060
88	1	2.5nm 23-2.2		6.1655	0.297225		7.463	0.207	2.21035	2.27276	0.972542	16:52	-2682	184
89	1	2.5nm 23-2.3		6.2735	0.297225		7.571	0.296	2.19467	2.27166	0.966108	16:56	-2486	200
511	4	01JH-13b 2.5NM 23-2		6.33274	0.254483	0.31328	6.648	0.245	2.81003	1.86365	1.50782	11:32	-1612	1197	-24	13	-1836628	-52499	0.000766497	0.000189427		01JH-13b 2.5NM 23-2_LR-3	1003.18	9.03588	0.83	8.95202	0.0838558	0.526739	9.57981	0.570545	0.605537	0.526739	0.0787984	13.8111
																						01JH-13b 2.5NM 23-2_LR-4	1002.57	10.1512	0.83	10.0765	0.0747255	0.605537
																						01JH-13b 2.5NM 23-2_LR-5	1002.59	9.78841	0.83	9.71094	0.0774692	0.579359
512	4	01JH-13b 2.5NM 23-2 2		6.08581	0.254483	0.31328	6.401	0.249	2.80292	1.85508	1.51094	11:36	-1570	1195	-25	13	-1836628	-52499	0.000722818	0.000145748		01JH-13b 2.5NM 23-2_LR-1	1003.39	8.7746	0.83	8.68827	0.0863268	0.509081	8.7305	0.511788	0.514496	0.509081	0.00541507	1.05807		2.5NM 23-2-2	3	core	120	18	0.15	0.04	3e-05	0.44241	0.00104	0.2264	0.0035	0.0393	0.0003
																						01JH-13b 2.5NM 23-2_LR-2	1003.24	8.85824	0.83	8.77272	0.0855201	0.514496
513	4	01JH-13b 2.5NM 23-2 3, on crack				0.31328	6.568	0.231	2.79491	1.85473	1.50691	11:39	-1599	1167	-24	13	-1836628	-52499	0.00111309			01JH-13b 2.5NM 23-2_LR-6	1003.36	8.61253	0.83	8.5246	0.0879341	0.497627	8.46478	0.493606	0.497627	0.489585	0.00804193	1.62922
																						01JH-13b 2.5NM 23-2_LR-7	1003.64	8.49411	0.83	8.40496	0.0891468	0.489585
97	1	2.5nm 24-1.1		6.62838	0.352662		7.91	0.233	2.18751	2.25918	0.968277	17:26	-2816	-106							4062
98	1	2.5nm 24-1.2		6.60438	0.352662		7.886	0.255	2.20853	2.26556	0.974829	17:29	-3020	-172
514	4	01JH-13b 2.5NM 24-1		6.50168	0.254483	0.31328	6.817	0.218	2.77878	1.84624	1.5051	11:43	-1965	894	-24	15	-1836628	-52499	0.000691947	0.000114877		01JH-13b 2.5NM 24-1_LR-1	1006.44	4.09829	0.83	3.91563	0.182661	0.212243	3.98284	0.215983	0.219723	0.212243	0.00748048	3.46346		2.5NM 24-1-2	3	core	26	13	0.5	0.11	7e-05	0.44303	0.00470	0.2123	0.0046	0.1284	0.0016
																						01JH-13b 2.5NM 24-1_LR-2	1006.54	4.22726	0.83	4.05005	0.177207	0.219723
515	4	01JH-13b 2.5NM 24-1 2		6.64964	0.254483	0.31328	6.965	0.184	2.75461	1.83689	1.4996	11:46	-1988	886	-24	15	-1836628	-52499	0.000664673	8.7603e-05		01JH-13b 2.5NM 24-1_LR-3	1006.62	4.34088	0.83	4.16821	0.172666	0.226656	4.19335	0.228104	0.229552	0.226656	0.00289632	1.26974		2.5NM 24-1-2	3	core	26	13	0.5	0.11	7e-05	0.44303	0.00470	0.2123	0.0046	0.1284	0.0016
																						01JH-13b 2.5NM 24-1_LR-4	1006.51	4.38928	0.83	4.21848	0.170801	0.229552
99	1	2.5nm 24-2.1		5.12538	0.352662		6.407	0.24	2.19463	2.25226	0.974411	17:33	-4017	-197							4019
100	1	2.5nm 24-2.2		5.38938	0.352662		6.671	0.228	2.20207	2.2618	0.973588	17:37	-3924	-177
101	1	2.5nm 24-2.3		4.90038	0.352662		6.182	0.191	2.18902	2.26751	0.965385	17:40	-3977	-249
102	1	2.5nm 24-2.4		5.39438	0.352662		6.676	0.163	2.20336	2.26278	0.973739	17:44	-3973	-192
516	4	01JH-13b 2.5NM 24-2		5.08313	0.254483	0.31328	5.398	0.261	2.74514	1.83094	1.4993	11:50	-3033	919	-22	14	-1836628	-52499	0.000657696	8.06259e-05		01JH-13b 2.5NM 24-2_LR-5	1006.94	4.16571	0.83	3.98594	0.179769	0.216267	4.40964	0.241149	0.304102	0.203078	0.101024	41.8929		2.5NM 24-2-2	3	core	49	14	0.29	0.04	3e-05	0.43032	0.00461	0.2110	0.0100	0.0736	0.0032
																						01JH-13b 2.5NM 24-2_LR-6	1007.08	3.95344	0.83	3.76424	0.189201	0.203078
																						01JH-13b 2.5NM 24-2_LR-7	1005.02	5.61291	0.83	5.47874	0.134168	0.304102
517	4	01JH-13b 2.5NM 24-2 2		4.90418	0.254483	0.31328	5.219	0.283	2.73209	1.8275	1.49499	11:54	-3071	944	-23	14	-1836628	-52499	0.000688843	0.000111773		01JH-13b 2.5NM 24-2_LR-8	1004.94	7.60042	0.83	7.50092	0.0995035	0.430376	5.72604	0.320957	0.430376	0.228393	0.0446792	14.7148
																						01JH-13b 2.5NM 24-2_LR-9	1006.2	4.36844	0.83	4.19684	0.171599	0.228393
																						01JH-13b 2.5NM 24-2_LR-10	1005.73	5.61449	0.83	5.48036	0.134131	0.304102
518	4	01JH-13b 2.5NM 24-2 3		5.45801	0.254483	0.31328	5.773	0.213	2.72574	1.82246	1.49564	11:57	-3003	954	-22	13	-1836628	-52499	0.000697645	0.000120575		01JH-13b 2.5NM 24-2_LR-1	1006.25	4.45833	0.83	4.29012	0.168209	0.233614	4.69181	0.257273	0.284878	0.233614	0.0446792	14.7148
																						01JH-13b 2.5NM 24-2_LR-2	1006.39	4.57473	0.83	4.41072	0.164014	0.2406
																						01JH-13b 2.5NM 24-2_LR-3	1006.07	5.05969	0.83	4.91112	0.148575	0.269999
																						01JH-13b 2.5NM 24-2_LR-4	1005.87	5.29732	0.83	5.1553	0.142024	0.284878
94	1	2.5nm 24-4.1		4.77738	0.352662		6.059	0.244	2.19157	2.24933	0.974321	17:15	-1995	-39							3846
95	1	2.5nm 24-4.2		4.58938	0.352662		5.871	0.301	2.19094	2.26575	0.966981	17:18	-2064	-33
96	1	2.5nm 24-4.3		4.71837	0.352662		6	0.334	2.19283	2.26928	0.966312	17:22	-1918	20
523	4	01JH-13b 2.5NM 24-4		4.37941	0.142882	0.39984	4.781	0.238	2.70336	1.79402	1.50687	12:15	-1007	845	-27	14	-1836628	-52499	0.000647518	7.32363e-05		01JH-13b 2.5NM 24-4_LR-4	1007.17	3.44193	0.83	3.22534	0.216585	0.173045	3.29775	0.176987	0.18093	0.173045	0.00788527	4.45527		2.5NM 24-4-2	4	core	37	25	0.67	0.11	7e-05	0.38353	0.00207	0.2081	0.0037	0.1758	0.0016
																						01JH-13b 2.5NM 24-4_LR-5	1007.1	3.57868	0.83	3.37016	0.208517	0.18093
524	4	01JH-13b 2.5NM 24-4 2 Cs-Res=164		4.80524	0.142882	0.39984	5.207	0.284	2.90433	1.90609	1.52371	12:21	-988	859	-27	14	-1836628	-52499	0.000651646	7.73637e-05		01JH-13b 2.5NM 24-4_LR-1	1007.09	3.58127	0.83	3.3729	0.20837	0.18093	3.50435	0.18848	0.192822	0.18093	0.0118923	6.30958
																						01JH-13b 2.5NM 24-4_LR-2	1007	3.75497	0.83	3.55601	0.198962	0.191686
																						01JH-13b 2.5NM 24-4_LR-3	1007.02	3.78174	0.83	3.58415	0.197587	0.192822
525	4	01JH-13b 2.5NM 24-4 3		4.47737	0.142882	0.39984	4.879	0.214	2.91325	1.93554	1.50514	12:24	-1030	870	-27	14	-1836628	-52499	0.000622096	4.78145e-05		01JH-13b 2.5NM 24-4_LR-6	1007.24	3.4223	0.83	3.20451	0.217795	0.17136	3.3975	0.182375	0.193391	0.17136	0.022031	12.0801		2.5NM 24-4-2	4	core	37	25	0.67	0.11	7e-05	0.38353	0.00207	0.2081	0.0037	0.1758	0.0016
																						01JH-13b 2.5NM 24-4_LR-7	1007.05	3.78777	0.83	3.59049	0.19728	0.193391
103	1	2.5nm 24-7.1		6.64438	0.352662		7.926	0.214	2.20671	2.25339	0.979282	17:47	-4577	-270							3931
104	1	2.5nm 24-7.2		6.54638	0.352662		7.828	0.202	2.20726	2.25496	0.978849	17:51	-4668	-261
526	4	01JH-13b 2.5NM 24-7		6.26066	0.142882	0.39984	6.663	0.202	2.91443	1.94567	1.49791	12:28	-3597	938	-22	12	-1836628	-52499	0.000672729	9.84473e-05		01JH-13b 2.5NM 24-7_LR-1	1005.71	6.35876	0.83	6.2401	0.118655	0.35059	5.94287	0.332494	0.35059	0.314398	0.0361918	10.885		2.5NM 24-7-2	4	core	59	34	0.57	0.09	6e-05	0.40575	0.00235	0.2124	0.0033	0.1486	0.0011
																						01JH-13b 2.5NM 24-7_LR-2	1006.03	5.77608	0.83	5.64564	0.130437	0.314398
527	4	01JH-13b 2.5NM 24-7 2		6.27865	0.142882	0.39984	6.681	0.245	2.91778	1.94677	1.49878	12:31	-3643	945	-22	13	-1836628	-52499	0.000721539	0.000147257		01JH-13b 2.5NM 24-7_LR-3	1006.04	5.19635	0.83	5.05161	0.144736	0.278316	5.17716	0.28579	0.293263	0.278316	0.0149475	5.23025		2.5NM 24-7-2	4	core	59	34	0.57	0.09	6e-05	0.40575	0.00235	0.2124	0.0033	0.1486	0.0011
																						01JH-13b 2.5NM 24-7_LR-4	1006.17	5.44105	0.83	5.30272	0.138335	0.293263
109	1	2.5nm 25-5.1		6.11437	0.352662		7.396	0.212	2.18032	2.25347	0.96754	18:11	-2799	-328							4034
110	1	2.5nm 25-5.2		6.03238	0.352662		7.314	0.203	2.19422	2.26392	0.969216	18:14	-2665	-364
528	4	01JH-13b 2.5NM 25-5		5.95178	0.142882	0.39984	6.354	0.242	2.90096	1.93945	1.49577	12:35	-1883	652	-25	14	-1836628	-52499	0.000661703	8.74206e-05		01JH-13b 2.5NM 25-5_LR-3	1005.42	5.93575	0.83	5.80877	0.126982	0.324142	5.68962	0.316838	0.324142	0.310758	0.0133844	4.22439		2.5NM 25-5-2	4	core	77	41	0.53	0.01	0	0.43469	0.00143	0.2200	0.0033	0.1399	0.0012
																						01JH-13b 2.5NM 25-5_LR-4	1005.58	5.72533	0.83	5.59375	0.131575	0.310758
																						01JH-13b 2.5NM 25-5_LR-5	1005.42	5.79633	0.83	5.66634	0.129989	0.315613
529	4	01JH-13b 2.5NM 25-5 2		5.94778	0.142882	0.39984	6.35	0.286	2.90776	1.93589	1.50202	12:39	-1838	650	-25	14	-1836628	-52499	0.00067349	9.92075e-05		01JH-13b 2.5NM 25-5_LR-1	1004.81	6.68997	0.83	6.57711	0.112861	0.371778	6.347	0.357474	0.371778	0.34317	0.0286072	8.00259		2.5NM 25-5-2	4	core	77	41	0.53	0.01	0	0.43469	0.00143	0.2200	0.0033	0.1399	0.0012
																						01JH-13b 2.5NM 25-5_LR-2	1004.88	6.23781	0.83	6.11689	0.120923	0.34317
107	1	2.5nm 25-7.1		6.21237	0.352662		7.494	0.228	2.19047	2.24631	0.97514	18:03	-3413	-436							3927
108	1	2.5nm 25-7.2		6.17438	0.352662		7.456	0.242	2.19942	2.25723	0.974388	18:07	-3515	-384
530	4	01JH-13b 2.5NM 25-7		5.78885	0.142882	0.39984	6.191	0.297	2.90279	1.9256	1.50747	12:44	-2579	663	-24	14	-1836628	-52499	0.000745806	0.000171524
531	4	01JH-13b 2.5NM 25-7 2		5.98777	0.142882	0.39984	6.39	0.23	2.87787	1.91657	1.50157	12:47	-2575	644	-24	13	-1836628	-52499	0.000696284	0.000122002
532	4	01JH-13b 2.5NM 25-7 3		5.67689	0.142882	0.39984	6.079	0.226	2.87211	1.91274	1.50157	12:50	-2552	658	-25	14	-1836628	-52499	0.000710843	0.000136561
105	1	2.5nm 25-8.1 core		6.66937	0.352662		7.951	0.292	2.20402	2.2523	0.978563	17:55	-5378	-670							3821
106	1	2.5nm 25-8.2 rim		6.69838	0.352662		7.98	0.205	2.19809	2.26407	0.970858	17:58	-5306	-580
533	4	01JH-13b 2.5NM 25-8		6.34862	0.142882	0.39984	6.751	0.257	2.88	1.90624	1.51082	12:54	-4448	682	-19	12	-1836628	-52499	0.000614608	4.03261e-05		01JH-13b 2.5NM 25-8_LR-1	1005.87	5.06069	0.83	4.91214	0.148546	0.269999	4.78659	0.262619	0.269999	0.25524	0.0147586	5.61976		2.5NM 25-8-2	4	core	93	69	0.75	0.03	2e-05	0.37730	0.00148	0.2042	0.0029	0.1975	0.0010
																						01JH-13b 2.5NM 25-8_LR-2	1005.76	4.81695	0.83	4.66103	0.155921	0.25524
534	4	01JH-13b 2.5NM 25-8 2		6.27665	0.142882	0.39984	6.679	0.198	2.88197	1.90526	1.51264	12:57	-4482	676	-19	12	-1836628	-52499	0.000640298	6.60155e-05		01JH-13b 2.5NM 25-8_LR-3	1005.18	6.16657	0.83	6.04427	0.122299	0.338241	5.69647	0.317254	0.338241	0.296268	0.0419732	13.2301		2.5NM 25-8-2	4	core	93	69	0.75	0.03	2e-05	0.37730	0.00148	0.2042	0.0029	0.1975	0.0010
																						01JH-13b 2.5NM 25-8_LR-4	1005.44	5.48589	0.83	5.34867	0.137223	0.296268
115	1	2.5M 1-3.1		6.14663	0.227189		7.324	0.389	2.16772	2.24307	0.96641	18:33	-1958	-1159							4069
116	1	2.5M 1-3.2		6.17963	0.227189		7.357	0.24	2.17113	2.25613	0.962323	18:36	-2032	-1184
535	4	01JH-13b 2.5M 1-3		6.17169	0.142882	0.39984	6.574	0.277	2.83778	1.89869	1.4946	13:01	-1132	-244	-28	14	-1836628	-52499	0.000678298	0.000104016		01JH-13b 2.5M 1-3_LR-3	1005.24	5.9509	0.83	5.82424	0.126664	0.324753	5.74561	0.320183	0.324753	0.315613	0.00913948	2.85445		2.5M 1-3-2	4	core	45	16	0.36	0.16	0.0001	0.44507	0.00191	0.2117	0.0049	0.0890	0.0009
																						01JH-13b 2.5M 1-3_LR-4	1005.6	5.79695	0.83	5.66698	0.129975	0.315613
536	4	01JH-13b 2.5M 1-3 2		6.10772	0.142882	0.39984	6.51	0.293	2.84113	1.89701	1.49769	13:04	-1163	-232	-28	14	-1836628	-52499	0.000643334	6.90517e-05		01JH-13b 2.5M 1-3_LR-5	1006.06	4.40633	0.83	4.23618	0.170154	0.230712	4.18437	0.227444	0.234777	0.216842	0.0179345	7.88525
																						01JH-13b 2.5M 1-3_LR-6	1006.42	4.48004	0.83	4.31263	0.16741	0.234777
																						01JH-13b 2.5M 1-3_LR-7	1006.3	4.18334	0.83	4.00431	0.179028	0.216842
537	4	01JH-13b 2.5M 1-3 3		6.1457	0.142882	0.39984	6.548	0.225	2.84686	1.88688	1.50876	13:08	-1119	-222	-28	14	-1836628	-52499	0.000644977	7.06952e-05		01JH-13b 2.5M 1-3_LR-1	1005.56	5.2797	0.83	5.13721	0.14249	0.283683	4.83099	0.265355	0.283683	0.247027	0.0366558	13.8139		2.5M 1-3-2	4	core	45	16	0.36	0.16	0.0001	0.44507	0.00191	0.2117	0.0049	0.0890	0.0009
																						01JH-13b 2.5M 1-3_LR-2	1005.68	4.68499	0.83	4.52476	0.160228	0.247027
117	1	2.5M 2-1.1		6.30663	0.227189		7.484	0.202	2.16291	2.25109	0.960828	18:40	-1993	-1442							4125
118	1	2.5M 2-1.2		6.23963	0.227189		7.417	0.232	2.17857	2.24956	0.968445	18:44	-1952	-1484
542	4	01JH-13b 2.5M 2-1		6.31478	0.121851	0.381807	6.699	0.232	2.78735	1.85156	1.50541	13:28	-1087	-527	-21	14	-1836628	-52499	0.000672677	0.00011183		01JH-13b 2.5M 2-1_LR-4	1006.41	4.49098	0.83	4.32397	0.167011	0.235358	4.65541	0.255053	0.274747	0.235358	0.0393884	15.4432
																						01JH-13b 2.5M 2-1_LR-5	1005.86	5.13333	0.83	4.98685	0.146481	0.274747
543	4	01JH-13b 2.5M 2-1 2		6.50871	0.121851	0.381807	6.893	0.23	2.7769	1.85101	1.50021	13:31	-1038	-531	-21	14	-1836628	-52499	0.00065522	9.43737e-05		01JH-13b 2.5M 2-1_LR-1	1006.96	4.08031	0.83	3.89686	0.183448	0.211095	4.12503	0.223982	0.234196	0.211095	0.0231011	10.3138
																						01JH-13b 2.5M 2-1_LR-2	1006.97	4.34697	0.83	4.17454	0.172429	0.226656
																						01JH-13b 2.5M 2-1_LR-3	1006.8	4.47141	0.83	4.30368	0.167727	0.234196
121	1	2.5M 5-2.1		6.50463	0.227189		7.682	0.249	2.15421	2.24099	0.961275	18:56	-4415	-2441							4017
122	1	2.5M 5-2.2		6.88063	0.227189		8.058	0.21	2.04219	2.24209	0.910843	19:00	-4368	-2424
128	2	01JH-13b 2.5M 5-2 zrc		6.61095	0.40522	1.18024	7.799	0.238	2.63312	1.80173	1.46144	12:02	-3680	-1002	-20	2	-2635140	-51733	0.000752433	4.94227e-05
544	4	01JH-13b 2.5M 5-2		6.81959	0.121851	0.381807	7.204	0.265	2.76432	1.85046	1.49385	13:36	-3736	-1203	-17	13	-1836628	-52499	0.000627622	6.67757e-05		01JH-13b 2.5M 5-2_LR-3	1006.67	4.07954	0.83	3.89606	0.183482	0.211095	4.23112	0.230404	0.252303	0.211095	0.0412081	17.8852		2.5M 5-2-2	4	core	26	14	0.53	0.12	8e-05	0.42983	0.00290	0.2230	0.0046	0.1407	0.0015
																						01JH-13b 2.5M 5-2_LR-3b	1006.77	4.3601	0.83	4.18818	0.17192	0.227814
																						01JH-13b 2.5M 5-2_LR-4	1006.68	4.76666	0.83	4.60912	0.157535	0.252303
545	4	01JH-13b 2.5M 5-2 2		6.62366	0.121851	0.381807	7.008	0.244	2.75741	1.84647	1.49334	13:39	-3739	-1187	-17	13	-1836628	-52499	0.000644928	8.40817e-05		01JH-13b 2.5M 5-2_LR-3b	1006.77	4.3601	0.83	4.18818	0.17192	0.227814	4.39865	0.240058	0.252303	0.227814	0.0244891	10.2013		2.5M 5-2-2	4	core	26	14	0.53	0.12	8e-05	0.42983	0.00290	0.2230	0.0046	0.1407	0.0015
																						01JH-13b 2.5M 5-2_LR-4	1006.68	4.76666	0.83	4.60912	0.157535	0.252303
546	4	01JH-13b 2.5M 5-2 3		6.77561	0.121851	0.381807	7.16	0.248	2.73416	1.83994	1.486	13:43	-3758	-1215	-17	13	-1836628	-52499	0.000636111	7.52644e-05		01JH-13b 2.5M 5-2_LR-1	1006.75	3.94716	0.83	3.75766	0.189495	0.203078	3.89422	0.210824	0.21857	0.203078	0.0154924	7.3485		2.5M 5-2-2	4	core	26	14	0.53	0.12	8e-05	0.42983	0.00290	0.2230	0.0046	0.1407	0.0015
																						01JH-13b 2.5M 5-2_LR-2	1006.66	4.20874	0.83	4.03077	0.177971	0.21857
119	1	2.5M 5-3.1		6.50063	0.227189		7.678	0.221	2.1808	2.23916	0.973937	18:48	-2940	-2220							3996
120	1	2.5M 5-3.2		6.67963	0.227189		7.857	0.214	2.16941	2.25113	0.963701	18:52	-2789	-2206
547	4	01JH-13b 2.5M 5-3		6.68764	0.121851	0.381807	7.072	0.25	2.74854	1.83368	1.49892	13:47	-2262	-1214	-20	12	-1836628	-52499	0.000720597	0.00015975		01JH-13b 2.5M 5-3_LR-3	1004.57	6.64743	0.83	6.53386	0.113573	0.368646	6.46349	0.364277	0.368646	0.359907	0.00873919	2.39905
																						01JH-13b 2.5M 5-3_LR-4	1004.92	6.50907	0.83	6.39312	0.115954	0.359907
548	4	01JH-13b 2.5M 5-3 2		6.71363	0.121851	0.381807	7.098	0.188	2.73122	1.82351	1.49778	13:50	-2226	-1194	-20	12	-1836628	-52499	0.000715318	0.000154471		01JH-13b 2.5M 5-3_LR-1	1003.91	7.54687	0.83	7.44667	0.100201	0.427143	6.84263	0.388866	0.427143	0.35059	0.0765526	19.6861		2.5M 5-3-2	4	core	72	15	0.21	0.02	1e-05	0.42396	0.00702	0.2211	0.0053	0.0568	0.0007
																						01JH-13b 2.5M 5-3_LR-2	1004.36	6.35728	0.83	6.2386	0.118683	0.35059
123	1	2.5M 6-3.1 rim		6.62063	0.227189		7.798	0.23	2.18593	2.23947	0.976095	19:04	-3338	-2494							4089
124	1	2.5M 6-3.2 core		5.68263	0.227189		6.86	0.274	2.16716	2.24197	0.966632	19:08	-3407	-2496
125	1	2.5M 6-3.3 rim		6.65763	0.227189		7.835	0.259	2.1804	2.24385	0.971723	19:12	-3362	-2464
126	1	2.5M 6-3.4 core		6.06762	0.227189		7.245	0.257	2.10652	2.24495	0.938338	19:16	-3431	-2486
549	4	01JH-13b 2.5M 6-3, on crack				0.381807	5.893	0.234	2.82266	1.8187	1.55202	13:54	-2659	-1408	-19	13	-1836628	-52499	0.00264517			01JH-13b 2.5M 6-3_LR-1	1001.71	11.4892	0.83	11.4231	0.0660924	0.703625	11.7262	0.726911	0.740853	0.703625	0.0372289	5.12152
																						01JH-13b 2.5M 6-3_LR-2	1001.4	11.9707	0.83	11.9072	0.0634543	0.740853
																						01JH-13b 2.5M 6-3_LR-3	1001.27	11.9121	0.83	11.8483	0.0637641	0.736254
550	4	01JH-13b 2.5M 6-3 2		6.38576	0.121851	0.381807	6.77	0.259	2.71179	1.81671	1.4927	13:58	-2638	-1416	-20	13	-1836628	-52499	0.000757731	0.000196885		01JH-13b 2.5M 6-3_LR-3	1001.27	11.9121	0.83	11.8483	0.0637641	0.736254	11.6169	0.718894	0.736254	0.684175	0.0520786	7.24426		2.5M 6-3-2	4	core	164	63	0.38	0.04	3e-05	0 45122	0.00163	0.2251	0.0027	0.1014	0.0005
																						01JH-13b 2.5M 6-3_LR-4	1001.24	11.9102	0.83	11.8464	0.0637742	0.736254
																						01JH-13b 2.5M 6-3_LR-5	1001.75	11.2236	0.83	11.156	0.0676437	0.684175
551	4	01JH-13b 2.5M 6-3 3		6.55369	0.121851	0.381807	6.938	0.257	2.70299	1.81107	1.49248	14:02	-2643	-1396	-20	13	-1836628	-52499	0.00139808	0.000837232		01JH-13b 2.5M 6-3_LR-2	1001.4	11.9707	0.83	11.9072	0.0634543	0.740853	11.6365	0.720427	0.740853	0.684175	0.0566783	7.86732
																						01JH-13b 2.5M 6-3_LR-4	1001.24	11.9102	0.83	11.8464	0.0637742	0.736254
																						01JH-13b 2.5M 6-3_LR-5	1001.75	11.2236	0.83	11.156	0.0676437	0.684175
127	1	2.5M 8.4.1 rim		5.80763	0.227189		6.985	0.286	2.17042	2.23211	0.972359	19:21	-2414	-2773							4007
128	1	2.5M 8.4.2 core		4.09262	0.227189		5.27	0.202	2.17101	2.24029	0.969073	19:25	-2404	-2722
129	1	2.5M 8.4.3 rim		5.95363	0.227189		7.131	0.228	2.16868	2.24436	0.966279	19:28	-2358	-2718
130	1	2.5M 8.4.4 rim		5.84463	0.227189		7.022	0.203	2.1565	2.24549	0.960369	19:32	-2542	-2748
129	2	01JH-13b 2.5M 8-4 zrc		5.90579	0.40522	1.18024	7.093	0.247	2.64966	1.80787	1.46563	12:06	-1796	-1504	-26	4	-2635140	-51733	0.000969618	0.000266607
552	4	01JH-13b 2.5M 8-4		5.88095	0.121851	0.381807	6.265	0.253	2.69855	1.79883	1.50017	14:06	-1749	-1833	-22	12	-1836628	-52499	0.000951602	0.000390755		01JH-13b 2.5M 8-4_LR-7	1002.87	9.06937	0.83	8.98582	0.0835493	0.529471	9.48697	0.564303	0.599135	0.529471	0.0696641	12.3452		2.5M 8-4-2	2	core	157	17	0.11	0.14	9e-05	0.42695	0.00641	0.1689	0.0065	0.0237	0 0004
																						01JH-13b 2.5M 8-4_LR-8	1003.27	10.0635	0.83	9.98813	0.0753708	0.599135
553	4	01JH-13b 2.5M 8-4 2 Cs-Res=165, on crack				0.381807	4.953	0.19	2.92892	1.91876	1.52646	14:12	-1796	-1804	-23	13	-1836628	-52499	0.00205974			01JH-13b 2.5M 8-4_LR-3	997.208	19.5534	0.83	19.5144	0.0389626	1.44406	19.6711	1.46231	1.48056	1.44406	0.0364995	2.49602
																						01JH-13b 2.5M 8-4_LR-4	996.977	19.8662	0.83	19.8278	0.038352	1.48056
554	4	01JH-13b 2.5M 8-4 3, too close to EIB liEt out				0.381807	5.769	0.172	2.88532	1.95557	1.47544	14:15	-1808	-1819	-22	12	-1836628	-52499	0.00283575			01JH-13b 2.5M 8-4_LR-5	1001.28	13.2727	0.83	13.2154	0.0572726	0.84429	11.9203	0.744725	0.84429	0.64516	0.19913	26.7387
																						01JH-13b 2.5M 8-4_LR-6	1001.64	10.6962	0.83	10.6252	0.0709505	0.64516
131	1	2.5M 10-3.1		6.48563	0.227189		7.663	0.193	2.18725	2.2264	0.982414	19:36	-5438	-3566							4096
132	1	2.5M 10-3.2		6.30663	0.227189		7.484	0.252	2.1835	2.24557	0.972359	19:39	-5533	-3584
555	4	01JH-13b 2.5M 10-3		5.91194	0.121851	0.381807	6.296	0.263	2.96674	1.96523	1.50962	14:20	-4987	-2214	-17	12	-1836628	-52499	0.000640705	7.98583e-05		01JH-13b 2.5M 10-3_LR-2	1005.6	5.37382	0.83	5.23378	0.140036	0.289066	5.47033	0.303529	0.314398	0.289066	0.0253324	8.34596
																						01JH-13b 2.5M 10-3_LR-3	1005.52	5.77579	0.83	5.64535	0.130444	0.314398
																						01JH-13b 2.5M 10-3_LR-4	1005.53	5.66483	0.83	5.53187	0.132958	0.307124
556	4	01JH-13b 2.5M 10-3 2		6.0069	0.121851	0.381807	6.391	0.237	2.93833	1.96609	1.49451	14:23	-4973	-2204	-17	12	-1836628	-52499	0.000627484	6.6637e-05		01JH-13b 2.5M 10-3_LR-1	1005.66	5.27324	0.83	5.13058	0.142661	0.283086	5.33657	0.295517	0.314398	0.283086	0.0313124	10.5958
																						01JH-13b 2.5M 10-3_LR-2	1005.6	5.37382	0.83	5.23378	0.140036	0.289066
																						01JH-13b 2.5M 10-3_LR-3	1005.52	5.77579	0.83	5.64535	0.130444	0.314398
133	1	2.5M 10-4.1 core		6.25263	0.227189		7.43	0.29	2.18941	2.2264	0.983385	19:44	-5155	-3478							3752
134	1	2.5M 10-4.2 rim		6.23863	0.227189		7.416	0.192	2.16551	2.24714	0.963674	19:47	-5056	-3462
127	2	01JH-13b 2.5M 10-4 zrc		6.00367	0.40522	1.18024	7.191	0.244	2.63922	1.80337	1.46349	11:57	-4552	-2002	-19	3	-2635140	-51733	0.0008827	0.000179689
139	1	2.5M 13-2.1 core		6.40925	0.318844		7.698	0.238	2.15986	2.22934	0.968836	20:04	-5115	-3978							4081
140	1	2.5M 13-2.2 rim		6.70425	0.318844		7.993	0.239	2.16157	2.23	0.969313	20:08	-5027	-3951
557	4	01JH-13b 2.5M 13-2		6.30978	0.121851	0.381807	6.694	0.172	2.94524	1.96229	1.50091	14:27	-4651	-2674	-19	12	-1836628	-52499	0.000678557	0.00011771		01JH-13b 2.5M 13-2_LR-1	1003.85	8.6106	0.83	8.52265	0.0879536	0.497627	8.50544	0.496562	0.51314	0.478917	0.0342232	6.89204		2.5M 13-2-2	4	core	112	87	0.78	0.08	5e-05	0.44883	0.00341	0.2216	0.0027	0.2032	0.0009
																						01JH-13b 2.5M 13-2_LR-2	1003.73	8.33221	0.83	8.24135	0.0908601	0.478917
																						01JH-13b 2.5M 13-2_LR-3	1003.7	8.83803	0.83	8.75232	0.0857136	0.51314
558	4	01JH-13b 2.5M 13-2 2, on crack		6.47672	0.121851	0.381807	6.861	0.187	2.93983	1.95572	1.50319	14:30	-4597	-2687	-18	12	-1836628	-52499	0.000750335	0.000189488		01JH-13b 2.5M 13-2_LR-4	1003.5	7.85564	0.83	7.75933	0.0963082	0.447284	7.75998	0.447284	0.447284	0.447284	0	0
																						01JH-13b 2.5M 13-2_LR-5	1004.21	7.85693	0.83	7.76064	0.0962926	0.447284
141	1	2.5M 16-1.1		5.94625	0.318844		7.235	0.25	2.16962	2.21303	0.980385	20:13	-3398	-4190							4054
563	4	01JH-13b 2.5M 16-1		5.62053	0.285519	0.411157	6.034	0.24	2.88043	1.91806	1.50174	14:51	-2961	-3099	-23	13	-1836628	-52499	0.000745885	4.20085e-05		01JH-13b 2.5M 16-1_LR-3	1002.85	9.44314	0.83	9.36287	0.0802743	0.554937	9.12342	0.538452	0.554937	0.521968	0.0329691	6.12294
																						01JH-13b 2.5M 16-1_LR-4	1003.73	8.96845	0.83	8.88397	0.0844799	0.521968
564	4	01JH-13b 2.5M 16-1 2		5.7015	0.285519	0.411157	6.115	0.254	2.88276	1.91477	1.50554	14:54	-2930	-3112	-23	13	-1836628	-52499	0.00120186	0.000497982		01JH-13b 2.5M 16-1_LR-1	1002.64	10.3453	0.83	10.272	0.0733358	0.619128	9.35686	0.555695	0.619128	0.492262	0.126866	22.8302		2.5M 16-1-2	4	core	171	63	0.36	0.08	5e-05	0.44080	0.00124	0.1184	0.0022	0.0520	0.0004
																						01JH-13b 2.5M 16-1_LR-2	1003.41	8.53052	0.83	8.44175	0.0887704	0.492262
565	4	01JH-13b 2.5M 16-1 3		6.29126	0.285519	0.411157	6.705	0.212	2.7929	1.91313	1.45986	14:58	-2983	-3091	-23	13	-1836628	-52499	0.00086708	0.000163204		01JH-13b 2.5M 16-1_LR-4	1003.73	8.96845	0.83	8.88397	0.0844799	0.521968	8.08131	0.477745	0.678232	0.233034	0.445199	93.1876
																						01JH-13b 2.5M 16-1_LR-5	1003.14	11.1435	0.83	11.0754	0.068126	0.678232
																						01JH-13b 2.5M 16-1_LR-6	1005.86	4.45298	0.83	4.28457	0.168407	0.233034
142	1	2.5M 16-2.2		6.05525	0.318844		7.344	0.201	2.15446	2.22425	0.968624	20:17	-3312	-4175
143	1	2.5M 18-1.1		6.24525	0.318844		7.534	0.277	2.10688	2.22222	0.948099	20:23	-1985	-4277							4116
144	1	2.5M 18-1.2		6.31625	0.318844		7.605	0.286	2.16849	2.24909	0.964163	20:27	-1837	-4273
566	4	01JH-13b 2.5M 18-1		6.23828	0.285519	0.411157	6.652	0.268	2.82997	1.89693	1.49187	15:03	-1411	-3373	-21	11	-1836628	-52499	0.000677928	0.000111156		01JH-13b 2.5M 18-1_LR-1	1006.2	4.65899	0.83	4.49788	0.161105	0.245857	4.5319	0.247906	0.249956	0.245857	0.00409917	1.65351		2.5M 18-1-2	2	core	42	24	0.57	0.06	4e-05	0.43390	0.00328	0.2075	0.0039	0.1449	0.0018
																						01JH-13b 2.5M 18-1_LR-2	1006.23	4.72481	0.83	4.56591	0.158904	0.249956
567	4	01JH-13b 2.5M 18-1 2		6.48518	0.285519	0.411157	6.899	0.25	2.79195	1.88895	1.47804	15:06	-1413	-3406	-21	11	-1836628	-52499	0.000647249	8.04772e-05		01JH-13b 2.5M 18-1_LR-3	1006.15	4.82494	0.83	4.66927	0.155668	0.255828	4.67213	0.255828	0.255828	0.255828	0	0		2.5M 18-1-2	2	core	42	24	0.57	0.06	4e-05	0.43390	0.00328	0.2075	0.0039	0.1449	0.0018
																						01JH-13b 2.5M 18-1_LR-4	1006.26	4.83048	0.83	4.67499	0.155493	0.255828
145	1	2.5M 19-3.1		6.84425	0.318844		8.133	0.251	2.19228	2.24002	0.978688	20:31	-3367	-4641							4187
146	1	2.5M 19-3.2		6.49825	0.318844		7.787	0.244	2.18481	2.24905	0.971435	20:35	-3263	-4639
147	1	2.5M 19-3.3		6.27425	0.318844		7.563	0.248	2.17218	2.26505	0.958997	20:38	-3400	-4651
568	4	01JH-13b 2.5M 19-3		6.61012	0.285519	0.411157	7.024	0.251	2.81674	1.88195	1.49671	15:10	-2950	-3544	-19	13	-1836628	-52499	0.000741328	3.74518e-05		01JH-13b 2.5M 19-3_LR-3	1002.11	10.9945	0.83	10.9255	0.0690415	0.667141	10.4955	0.635983	0.667141	0.604825	0.0623165	9.79846		2.5M 19-3-2	4	core	120	19	0.16	0.06	4e-05	0.48186	0.00124	0.2264	0.0041	0.0419	0.0004
																						01JH-13b 2.5M 19-3_LR-4	1002.59	10.1403	0.83	10.0655	0.0748051	0.604825
569	4	01JH-13b 2.5M 19-3 2, near crack		6.1803	0.285519	0.411157	6.594	0.249	2.81231	1.87362	1.501	15:14	-2972	-3537	-19	13	-1836628	-52499	0.000732991	2.91149e-05		01JH-13b 2.5M 19-3_LR-5	1002.4	9.84538	0.83	9.76835	0.0770251	0.583579	9.47267	0.563041	0.583579	0.542504	0.041075	7.2952		2.5M 19-3-2	4	core	120	19	0.16	0.06	4e-05	0.48186	0.00124	0.2264	0.0041	0.0419	0.0004
																						01JH-13b 2.5M 19-3_LR-6	1002.48	9.25884	0.83	9.17698	0.0818564	0.542504
570	4	01JH-13b 2.5M 19-3 3		6.30125	0.285519	0.411157	6.715	0.256	2.78541	1.86865	1.4906	15:17	-2950	-3567	-19	11	-1836628	-52499	0.000743883	4.00069e-05		01JH-13b 2.5M 19-3_LR-1_02	1002.27	10.4891	0.83	10.4168	0.0723392	0.629929	10.4059	0.62947	0.667141	0.59134	0.0758012	12.0421		2.5M 19-3-2	4	core	120	19	0.16	0.06	4e-05	0.48186	0.00124	0.2264	0.0041	0.0419	0.0004
																						01JH-13b 2.5M 19-3_LR-2	1002.83	9.95175	0.83	9.87554	0.0762093	0.59134
																						01JH-13b 2.5M 19-3_LR-3	1002.11	10.9945	0.83	10.9255	0.0690415	0.667141
148	1	2.5M 24.1.1		7.23925	0.318844		8.528	0.256	2.1793	2.24455	0.97093	20:43	-5352	-5689							4299
149	1	2.5M 24.1.2		7.53125	0.318844		8.82	0.239	2.18267	2.26443	0.963894	20:46	-5373	-5684
150	1	2.5M 24.1.3		6.90225	0.318844		8.191	0.224	2.19499	2.27225	0.965999	20:50	-5414	-5732
151	1	2.5M 24.1.4		7.47825	0.318844		8.767	0.199	2.20649	2.26998	0.972032	20:53	-5321	-5700
152	1	2.5M 24.1.5		6.86125	0.318844		8.15	0.217	2.1595	2.26396	0.953862	20:56	-5331	-5669
571	4	01JH-13b 2.5M 24-1		6.23628	0.285519	0.411157	6.65	0.195	2.76891	1.85293	1.49434	15:22	-5078	-4355	-16	14	-1836628	-52499	0.000867411	0.000163535		01JH-13b 2.5M 24-1_LR-1_02	1000.95	13.7311	0.83	13.6757	0.0553734	0.882051	14.2035	0.926673	0.971295	0.882051	0.0892443	9.63061		2.5M 24-1-2	2	core	174	16	0.09	0.09	6e-05	0.52007	0.00536	0.2291	0.0061	0.0232	0.0003
																						01JH-13b 2.5M 24-1_LR-2	999.609	14.7828	0.83	14.7313	0.0514584	0.971295
572	4	01JH-13b 2.5M 24-1 2		6.59213	0.285519	0.411157	7.006	0.254	2.77663	1.85465	1.49712	15:26	-5096	-4343	-16	14	-1836628	-52499	0.000755042	5.11661e-05		01JH-13b 2.5M 24-1_LR-3	999.959	15.6053	0.83	15.5565	0.0487621	1.04507	13.2426	0.851732	1.04507	0.703625	0.341447	40.0886		2.5M 24-1-2	2	core	174	16	0.09	0.09	6e-05	0.52007	0.00536	0.2291	0.0061	0.0232	0.0003
																						01JH-13b 2.5M 24-1_LR-3b	1001.11	11.4849	0.83	11.4188	0.066117	0.703625
																						01JH-13b 2.5M 24-1_LR-4	1000.93	12.8117	0.83	12.7524	0.0593187	0.8065
165	1	2.5M 25-3.1		5.92575	0.321473		7.162	0.343	2.11798	2.24933	0.941606	22:38	-1413	-5279							4154
166	1	2.5M 25-3.2		6.33675	0.321473		7.573	0.192	2.16506	2.25648	0.959482	22:42	-1369	-5261
573	4	01JH-13b 2.5M 25-3		6.15731	0.285519	0.411157	6.571	0.299	2.78973	1.85719	1.50213	15:30	-1170	-4435	-25	9	-1836628	-52499	0.000656871	9.00997e-05		01JH-13b 2.5M 25-3_LR-1	1004.2	8.24749	0.83	8.15571	0.0917831	0.473607	6.7907	0.387346	0.473607	0.301085	0.172522	44.5395
																						01JH-13b 2.5M 25-3_LR-2	1005.36	5.56109	0.83	5.42569	0.135398	0.301085
574	4	01JH-13b 2.5M 25-3 2		6.26627	0.285519	0.411157	6.68	0.3	2.78083	1.85367	1.50018	15:33	-1109	-4413	-25	10	-1836628	-52499	0.00062908	6.23081e-05		01JH-13b 2.5M 25-3_LR-3	1006.33	4.86213	0.83	4.70763	0.154499	0.258182	4.89135	0.268842	0.282489	0.258182	0.0243067	9.04127		2.5M 25-3-2	4	core	52	28	0.54	0.02	1e-05	0.47133	0.00356	0.2296	0.0036	0.1370	0.0011
																						01JH-13b 2.5M 25-3_LR-4	1006.3	4.99241	0.83	4.84187	0.150541	0.265854
																						01JH-13b 2.5M 25-3_LR-5	1005.97	5.26737	0.83	5.12455	0.142818	0.282489
575	4	01JH-13b 2.5M 25-3 3		6.11233	0.285519	0.411157	6.526	0.224	2.78366	1.84804	1.50628	15:37	-1084	-4419	-25	10	-1836628	-52499	0.000632793	6.60216e-05		01JH-13b 2.5M 25-3_LR-6	1005.62	5.76033	0.83	5.62954	0.130788	0.313184	5.62015	0.312577	0.313184	0.31197	0.00121352	0.388231		2.5M 25-3-2	4	core	52	28	0.54	0.02	1e-05	0.47133	0.00356	0.2296	0.0036	0.1370	0.0011
																						01JH-13b 2.5M 25-3_LR-7	1005.63	5.74196	0.83	5.61076	0.1312	0.31197
167	1	5M 2-1.1		5.29275	0.321473		6.529	0.163	2.14889	2.24401	0.957612	22:57	1238	-1071							4266
168	1	5M 2-1.2		5.01775	0.321473		6.254	0.233	2.14591	2.26118	0.949024	23:00	1190	-1092
169	1	5M 2-1.3		5.07275	0.321473		6.309	0.282	2.14369	2.26227	0.947583	23:04	1277	-1002
576	4	01JH-13b 5M 2-1		5.12274	0.285519	0.411157	5.536	0.285	2.72896	1.82203	1.49776	15:43	2087	-599	-24	16	-1836628	-52499	0.000747866	4.399e-05		01JH-13b 5M 2-1_LR-1	1005.86	4.88823	0.83	4.73454	0.15369	0.25936	4.93771	0.271522	0.283683	0.25936	0.0243225	8.95786
																						01JH-13b 5M 2-1_LR-2	1005.69	5.28327	0.83	5.14087	0.142395	0.283683
577	4	01JH-13b 5M 2-1 2		5.4436	0.285519	0.411157	5.857	0.299	2.69971	1.82023	1.48317	15:46	2036	-604	-24	17	-1836628	-52499	0.000703876	0.000137105		01JH-13b 5M 2-1_LR-3	1006.4	4.52667	0.83	4.36095	0.16572	0.237686	4.29705	0.233909	0.237686	0.230132	0.00755446	3.22966		5M 2-1-2	4	core	39	32	0.83	0.38	0.00024	0.50859	0.00240	0.1402	0.0032	0.1445	0.0014
																						01JH-13b 5M 2-1_LR-4	1006.32	4.40341	0.83	4.23315	0.170264	0.230132
170	1	5M 4-2.1 core		4.38175	0.321473		5.618	0.232	2.17013	2.2388	0.969325	23:08	346	-1603							3904
171	1	5M 4-2.2 rim		3.81275	0.321473		5.049	0.174	2.14192	2.24878	0.952481	23:12	225	-1592
172	1	5M 4-2.3 core		4.46175	0.321473		5.698	0.285	2.15123	2.24217	0.959441	23:16	310	-1601
173	1	5M 4-2.4 rim		3.75875	0.321473		4.995	0.292	2.1657	2.24749	0.963608	23:19	310	-1560
131	2	01JH-13b 5M 4-2 zrc		3.79528	0.40522	1.18024	4.98	0.209	2.64905	1.81901	1.45631	12:16	1143	-641	-15	2	-2635140	-51733	0.00122907	0.000526056
582	4	01JH-13b 5M 4-2 Cs-Res=166		4.47977	0.307309	0.436279	4.918	0.262	2.92004	1.94602	1.50052	16:07	1067	-997	-22	15	-1836628	-52499	0.000815992	0.000243502																5M 4-2-2	4	core	256	227	0.89	0.2	0.00013	0.39861	0.00078	0.1435	0.0017	0.1727	0.0006
583	4	01JH-13b 5M 4-2 2		4.27186	0.307309	0.436279	4.71	0.202	2.95786	1.98467	1.49036	16:12	1050	-999	-22	15	-1836628	-52499	0.000862598	0.000290108																5M 4-2-2	4	core	256	227	0.89	0.2	0.00013	0.39861	0.00078	0.1435	0.0017	0.1727	0.0006
584	4	01JH-13b 5M 4-2 3		4.00098	0.307309	0.436279	4.439	0.201	2.96316	1.98569	1.49226	16:16	1062	-988	-22	15	-1836628	-52499	0.000837796	0.000265307
174	1	5M 6-2.1		5.43775	0.321473		6.674	0.204	2.145	2.23231	0.960886	23:24	2575	-1698							4229
175	1	5M 6-2.2		5.44375	0.321473		6.68	0.255	2.14321	2.24854	0.953156	23:27	2546	-1685
585	4	01JH-13b 5M 6-2		5.04852	0.307309	0.436279	5.487	0.23	2.9317	1.97724	1.48272	16:20	3267	-1392	-30	19	-1836628	-52499	0.000617048	4.45588e-05		01JH-13b 5M 6-2_LR-1	1005.33	4.93215	0.83	4.7798	0.152346	0.262309	5.24808	0.290174	0.308335	0.262309	0.0460254	15.8613
																						01JH-13b 5M 6-2_LR-2	1005.12	5.54675	0.83	5.41101	0.135742	0.299879
																						01JH-13b 5M 6-2_LR-3	1004.78	5.68589	0.83	5.55342	0.132473	0.308335
586	4	01JH-13b 5M 6-2 2, on crack				0.436279	5.823	0.202	2.93654	1.97106	1.48983	16:24	3256	-1408	-30	18	-1836628	-52499	0.00117315			01JH-13b 5M 6-2_LR-2	1005.12	5.54675	0.83	5.41101	0.135742	0.299879	5.94259	0.332542	0.389413	0.299879	0.0895339	26.924
																						01JH-13b 5M 6-2_LR-3	1004.78	5.68589	0.83	5.55342	0.132473	0.308335
																						01JH-13b 5M 6-2_LR-4	1004.33	6.97169	0.83	6.86333	0.10836	0.389413
180	1	5M 10-2.1 core		6.15075	0.321473		7.387	0.189	2.10115	2.22179	0.945704	23:49	1624	-2761							4265
181	1	5M 10-2.2 core		5.32175	0.321473		6.558	0.163	2.12868	2.23309	0.953245	23:52	1606	-2767
182	1	5M 10-2.3 rim?		5.49275	0.321473		6.729	0.25	2.13806	2.23258	0.95766	23:56	1680	-2764
587	4	01JH-13b 5M 10-2		5.05751	0.307309	0.436279	5.496	0.258	2.93105	1.95486	1.49936	16:29	2219	-2347	-26	15	-1836628	-52499	0.000850086	0.000277596		01JH-13b 5M 10-2_LR-1_02	998.219	14.9204	0.83	14.8694	0.0509867	0.983532	13.5446	0.872849	0.983532	0.769478	0.214054	24.5236		5M 10-2-2	4	core	170	184	1.08	0.05	3e-05	0.50811	0.00147	0.2222	0.0029	0.2627	0.0018
																						01JH-13b 5M 10-2_LR-2	998.843	13.5392	0.83	13.483	0.0561529	0.865537
																						01JH-13b 5M 10-2_LR-3	1000.32	12.343	0.83	12.2814	0.0615545	0.769478
588	4	01JH-13b 5M 10-2 2, phase overlap				0.436279	5.047	0.243	3.00655	1.9495	1.54221	16:34	2229	-2300	-26	16	-1836628	-52499	0.00184646			01JH-13b 5M 10-2_LR-4	998.766	17.7023	0.83	17.6593	0.0430157	1.24628	15.6325	1.05837	1.24628	0.865537	0.380745	35.9745
																						01JH-13b 5M 10-2_LR-5	999.561	15.8061	0.83	15.758	0.0481462	1.0633
																						01JH-13b 5M 10-2_LR-6	1000	13.5364	0.83	13.4802	0.0561645	0.865537
191	1	5M 12-4.1		6.18975	0.297711		7.503	0.261	2.10739	2.22977	0.945117	00:27	2572	-3035							4081
192	1	5M 12-4.2		6.18775	0.297711		7.501	0.266	2.11258	2.23094	0.946943	00:31	2468	-3048
133	2	01JH-13b 5M 12-4 zrc		6.27136	0.40522	1.18024	7.459	0.279	2.63425	1.8002	1.46331	12:30	3149	-2261	-23	3	-2635140	-51733	0.000857134	0.000154124
589	4	01JH-13b 5M 12-4		6.31397	0.307309	0.436279	6.753	0.243	2.93126	1.95635	1.49833	16:38	3115	-2719	-27	18	-1836628	-52499	0.000617277	4.47873e-05		01JH-13b 5M 12-4_LR-3	1003	7.40697	0.83	7.3049	0.10207	0.417476	6.99413	0.397766	0.417476	0.378057	0.0394196	9.91023		5M 12-4-2	4	core	77	78	1.02	0.83	0.00052	0.44879	0.00206	0.1066	0.0026	0.1484	0.0016
																						01JH-13b 5M 12-4_LR-4	1003.36	6.7945	0.83	6.68335	0.111148	0.378057
590	4	01JH-13b 5M 12-4 2		6.25299	0.307309	0.436279	6.692	0.239	2.91038	1.94328	1.49766	16:42	3145	-2717	-26	18	-1836628	-52499	0.000654869	8.2379e-05		01JH-13b 5M 12-4_LR-1	1002.11	9.31971	0.83	9.23838	0.081327	0.546639	7.47254	0.432342	0.546639	0.318046	0.228593	52.873		5M 12-4-2	4	core	77	78	1.02	0.83	0.00052	0.44879	0.00206	0.1066	0.0026	0.1484	0.0016
																						01JH-13b 5M 12-4_LR-2	1004.03	5.83581	0.83	5.70669	0.129123	0.318046
591	4	01JH-13b 5M 12-4 3		6.35895	0.307309	0.436279	6.798	0.231	2.88943	1.93339	1.49449	16:45	3105	-2675	-26	18	-1836628	-52499	0.000638505	6.60153e-05		01JH-13b 5M 12-4_LR-5	1003.02	8.05436	0.83	7.9604	0.093959	0.460398	7.31764	0.418913	0.460398	0.377428	0.0829703	19.8061
																						01JH-13b 5M 12-4_LR-6	1003.44	6.78617	0.83	6.67489	0.111282	0.377428
197	1	5M 14-4.1 core		6.58675	0.297711		7.9	0.361	2.15676	2.2153	0.973578	00:52	279	-3563							4033
198	1	5M 14-4.2 rim		6.32475	0.297711		7.638	0.24	2.14412	2.23528	0.959214	00:55	392	-3554
199	1	5M 14-4.3 core		6.58075	0.297711		7.894	0.258	2.15092	2.22108	0.96841	01:00	314	-3554
592	4	01JH-13b 5M 14-4		6.13105	0.307309	0.436279	6.57	0.221	2.88937	1.92877	1.49804	16:50	896	-2939	-24	13	-1836628	-52499	0.000745342	0.000172853		01JH-13b 5M 14-4_LR-3	999.026	15.7262	0.83	15.6778	0.0483894	1.05599	14.4527	0.952441	1.05599	0.761697	0.294292	30.8988
																						01JH-13b 5M 14-4_LR-4	999.108	15.5531	0.83	15.5042	0.0489248	1.03964
																						01JH-13b 5M 14-4_LR-5	1000.55	12.2383	0.83	12.1762	0.0620772	0.761697
593	4	01JH-13b 5M 14-4 2, not on CL domain		3.93101	0.307309	0.436279	4.369	0.169	2.8858	1.9249	1.49919	16:53	874	-2936	-23	12	-1836628	-52499	0.000834541	0.000262051		01JH-13b 5M 14-4_LR-1_02	998.427	16.8726	0.83	16.8275	0.0451195	1.16408	16.7021	1.15343	1.24021	1.05599	0.184224	15.9718
																						01JH-13b 5M 14-4_LR-2	998.453	17.6442	0.83	17.601	0.0431566	1.24021
																						01JH-13b 5M 14-4_LR-3	999.026	15.7262	0.83	15.6778	0.0483894	1.05599
594	4	01JH-13b 5M 14-4 3, not on CL domain		5.44335	0.307309	0.436279	5.882	0.239	2.89386	1.92705	1.50171	16:57	874	-2954	-23	11	-1836628	-52499	0.000802533	0.000230044		01JH-13b 5M 14-4_LR-1_02	998.427	16.8726	0.83	16.8275	0.0451195	1.16408	16.6442	1.14798	1.24021	1.03964	0.200576	17.4722
																						01JH-13b 5M 14-4_LR-2	998.453	17.6442	0.83	17.601	0.0431566	1.24021
																						01JH-13b 5M 14-4_LR-4	999.108	15.5531	0.83	15.5042	0.0489248	1.03964
195	1	5M 14-1.1		5.73075	0.297711		7.044	0.223	2.14148	2.22335	0.963176	00:43	-701	-3726							4068
196	1	5M 14-1.2		5.88775	0.297711		7.201	0.231	2.14449	2.23047	0.961452	00:46	-606	-3655
595	4	01JH-13b 5M 14-1		6.09206	0.307309	0.436279	6.531	0.226	2.8832	1.91661	1.50433	17:01	-207	-3012	-23	11	-1836628	-52499	0.00093625	0.00036376		01JH-13b 5M 14-1_LR-3	1003.48	8.92462	0.83	8.83973	0.0848905	0.519247	7.61875	0.438971	0.519247	0.370524	0.148723	33.8798		5M 14-1-2	4	core	78	20	0.26	5.82	0.00363	0.44369	0.00853	0.1612	0.0620	0.0681	0.0065
																						01JH-13b 5M 14-1_LR-4	1004.23	7.55373	0.83	7.45362	0.100111	0.427143
																						01JH-13b 5M 14-1_LR-5	1004.56	6.676	0.83	6.56291	0.113094	0.370524
596	4	01JH-13b 5M 14-1 2		6.10006	0.307309	0.436279	6.539	0.244	2.87745	1.91062	1.50603	17:04	-191	-3005	-23	10	-1836628	-52499	0.00085468	0.00028219		01JH-13b 5M 14-1_LR-1	1001.58	14.1221	0.83	14.0682	0.0538502	0.914691	10.5543	0.655435	0.914691	0.334552	0.580138	88.512		5M 14-1-2	4	core	78	20	0.26	5.82	0.00363	0.44369	0.00853	0.1612	0.0620	0.0681	0.0065
																						01JH-13b 5M 14-1_LR-1B	1001.57	13.3854	0.83	13.3286	0.0567937	0.853249
																						01JH-13b 5M 14-1_LR-2	1004.51	6.10404	0.83	5.98051	0.123533	0.334552
																						01JH-13b 5M 14-1_LR-3	1003.48	8.92462	0.83	8.83973	0.0848905	0.519247
200	1	5M 20-1.1		5.84275	0.297711		7.156	0.238	2.10521	2.22163	0.947596	01:04	3228	-4332							4133
201	1	5M 20-1.2		4.41675	0.297711		5.73	0.22	2.11951	2.24268	0.945082	01:07	3301	-4299
202	1	5M 20-1.3 core		4.29375	0.297711		5.607	0.281	2.13863	2.25097	0.950092	01:11	3255	-4317
203	1	5M 20-1.4 rim?		6.18175	0.297711		7.495	0.309	2.18159	2.25328	0.968183	01:14	3194	-4327
601	4	01JH-13b 5M 20-1		6.77001	0.280908	0.43802	7.211	0.198	2.84711	1.89376	1.50341	17:23	3586	-4070	-27	19	-1836628	-52499	0.000760975	0.000213848		01JH-13b 5M 20-1_LR-3	1000.91	13.3931	0.83	13.3363	0.0567613	0.854065	11.9997	0.750706	0.854065	0.647346	0.206719	27.5366
																						01JH-13b 5M 20-1_LR-4	1001.08	10.7337	0.83	10.663	0.0707048	0.647346
602	4	01JH-13b 5M 20-1 2, on crack				0.43802	6.718	0.271	2.89745	1.89228	1.5312	17:27	3602	-4067	-18	19	-1836628	-52499	0.00166252			01JH-13b 5M 20-1_LR-1	1001	11.7481	0.83	11.6835	0.0646473	0.723284	13.0442	0.831807	0.918072	0.723284	0.194788	23.4174
																						01JH-13b 5M 20-1_LR-2	1000.36	14.1666	0.83	14.1129	0.0536822	0.918072
																						01JH-13b 5M 20-1_LR-3	1000.91	13.3931	0.83	13.3363	0.0567613	0.854065
603	4	01JH-13b 5M 20-1 3		6.59209	0.280908	0.43802	7.033	0.226	2.85726	1.89122	1.5108	17:30	3595	-4078	-18	17	-1836628	-52499	0.00137228	0.000825153		01JH-13b 5M 20-1_LR-5	999.17	15.6542	0.83	15.6056	0.0486107	1.04961	14.7339	0.973328	1.04961	0.897043	0.15257	15.6751
																						01JH-13b 5M 20-1_LR-6	1000.69	13.9168	0.83	13.8622	0.0546394	0.897043
204	1	5M 22-1.1 core: Z-Eocus		6.17175	0.297711		7.485	0.309	2.00341	2.22335	0.901077	01:19	-634	-5123							4113
205	1	5M 22-1.2 rim low yield					6.942	0.238	1.90702	2.2451	0.849415	01:22	-689	-5144
206	1	5M 22-1.3 core		6.16875	0.297711		7.482	0.263	2.08256	2.23747	0.930763	01:26	-513	-5137
137	2	01JH-13b 5M 22-1 zrc		6.18646	0.40522	1.18024	7.374	0.222	2.60885	1.8074	1.44343	12:49	-148	-4130	-20	-4	-2635140	-51733	0.000859103	0.000156092
604	4	01JH-13b 5M 22-1		6.21626	0.280908	0.43802	6.657	0.274	2.79681	1.8701	1.49554	17:37	-262	-4420	-17	8	-1836628	-52499	0.00129664	0.000749515		01JH-13b 5M 22-1_LR-5	1002.33	14.1672	0.83	14.1135	0.0536799	0.918072	11.1413	0.696171	0.918072	0.47427	0.443802	63.749
																						01JH-13b 5M 22-1_LR-6	1003.38	8.26072	0.83	8.16908	0.0916377	0.47427
605	4	01JH-13b 5M 22-1 2		5.99335	0.280908	0.43802	6.434	0.265	2.75571	1.86091	1.48084	17:41	-272	-4437	-17	6	-1836628	-52499	0.0006889	0.000141773		01JH-13b 5M 22-1_LR-3	1003.53	8.74494	0.83	8.65832	0.0866165	0.507054	7.84574	0.453629	0.507054	0.400205	0.10685	23.5544		5M 22-1-3	4	core	138	70	0.51	0.01	0	0.45857	0.00117	0.2301	0.0028	0.1355	0 0006
																						01JH-13b 5M 22-1_LR-4	1004.23	7.139	0.83	7.03315	0.105853	0.400205
606	4	01JH-13b 5M 22-1 3, on crack				0.43802	6.962	0.262	2.76659	1.85512	1.49133	17:44	-253	-4441	-17	6	-1836628	-52499	0.00164446			01JH-13b 5M 22-1_LR-1	1003.03	10.1571	0.83	10.0824	0.0746824	0.605537	8.92516	0.525867	0.605537	0.46501	0.140527	26.7229
																						01JH-13b 5M 22-1_LR-2	1003.78	8.12786	0.83	8.03474	0.0931188	0.46501
																						01JH-13b 5M 22-1_LR-3	1003.53	8.74494	0.83	8.65832	0.0866165	0.507054
207	1	5M 22-2.1		5.89875	0.297711		7.212	0.194	2.12803	2.22386	0.956906	01:30	367	-4998							4128
208	1	5M 22-2.2		5.71175	0.297711		7.025	0.215	1.95762	2.21889	0.882248	01:34	492	-4956
607	4	01JH-13b 5M 22-2 near large hole		5.8954	0.280908	0.43802	6.336	0.271	2.5812	1.65516	1.55948	17:48	827	-4399	-24	4	-1836628	-52499	0.000602162	5.50348e-05		01JH-13b 5M 22-2_LR-1	1002.77	8.29087	0.83	8.19956	0.0913081	0.47626	8.45404	0.493347	0.510433	0.47626	0.0341729	6.92674
																						01JH-13b 5M 22-2_LR-2	1002.43	8.79466	0.83	8.70853	0.0861319	0.510433
37	1	2.5nm 7-2.1 core		6.66263	0.282021		7.862	0.2	2.22858	2.28164	0.976746	13:38	-4207	3541							3625
38	1	2.5nm 7-2.2 rim		7.02262	0.282021		8.222	0.198	2.13948	2.28789	0.935131	13:42	-4102	3539
300	8	01JH-13b 2.5NM 7-2 core CL dark		6.37968	0.185539	-1.10662	5.266	0.219	2.73351	1.61561	1.69194	0.896528	-3494	3648	22	-6	-1858188	-190192	0.000650001	0.000131327		01JH-13b 2.5NM 7-2_LR-3	1001.58	11.3456	0.83	11.2787	0.0669222	0.693126	11.0057	0.672792	0.693126	0.652458	0.0406683	6.0447		2.5NM 7-2-2	3	core	98	30	0.3	0.09	6e-05	0.33162	0.00136	0.1980	0.0032	0.0806	0.0006
																						01JH-13b 2.5NM 7-2_LR-4	1002.44	10.803	0.83	10.7327	0.0702551	0.652458
301	8	01JH-13b 2.5NM 7-2 rim oscillatory		6.4938	0.185539	-1.10662	5.38	0.219	2.74487	1.62582	1.6883	0.899306	-3574	3669	22	-5	-1858188	-190192	0.000540657	2.19828e-05		01JH-13b 2.5NM 7-2_LR-5	1003.5	9.34735	0.83	9.26626	0.0810889	0.54871	7.75415	0.449235	0.54871	0.333325	0.215385	47.9449
																						01JH-13b 2.5NM 7-2_LR-6	1004.63	6.08195	0.83	5.95797	0.123975	0.333325
																						01JH-13b 2.5NM 7-2_LR-7	1003.91	8.13128	0.83	8.0382	0.0930801	0.46567
302	8	01JH-13b 2.5NM 7-2 sector zone bright core		5.95321	0.185539	-1.10662	4.84	0.27	2.71895	1.61221	1.68647	0.901389	-3445	3652	25	-6	-1858188	-190192	0.000637288	0.000118614		01JH-13b 2.5NM 7-2_LR-1	1003.04	8.83997	0.83	8.75427	0.085695	0.51314	8.13873	0.472406	0.51314	0.431671	0.0814692	17.2456
																						01JH-13b 2.5NM 7-2_LR-2	1003.5	7.6224	0.83	7.52318	0.09922	0.431671
50	1	2.5nm 12-1.1 core		6.808	0.356819		7.932	0.163	2.24982	2.27944	0.987003	14:25	-5230	2401							3731
51	1	2.5nm 12-1.2 rim		6.127	0.356819		7.251	0.196	2.23567	2.2922	0.975339	14:28	-5129	2368
52	1	2.5nm 12-1.3 core		6.669	0.356819		7.793	0.207	2.24795	2.29783	0.978294	14:32	-5197	2402
303	8	01JH-13b 2.5NM 12-1 remnant oscillatory rim		6.0413	0.185539	-1.10662	4.928	0.222	2.69554	1.59656	1.68834	0.904861	-4617	2538	16	-8	-1858188	-190192	0.000527202	8.52777e-06		01JH-13b 2.5NM 12-1_LR-3	1006.72	4.23219	0.83	4.05518	0.177005	0.2203	4.17092	0.226957	0.233614	0.2203	0.0133146	5.86659
																						01JH-13b 2.5NM 12-1_LR-4	1006.55	4.45498	0.83	4.28665	0.168333	0.233614
304	8	01JH-13b 2.5NM 12-1 core little CL		6.24753	0.185539	-1.10662	5.134	0.22	2.70525	1.60094	1.68978	0.906944	-4612	2575	16	-8	-1858188	-190192	0.000562264	4.35905e-05		01JH-13b 2.5NM 12-1_LR-1	1006.89	4.49061	0.83	4.32359	0.167024	0.235358	4.5669	0.24972	0.264081	0.235358	0.0287225	11.5019		2.5NM 12-1-2	3	core	59	50	0.85	0.04	3e-05	0.35566	0.00145	0.2015	0.0025	0.2264	0.0014
																						01JH-13b 2.5NM 12-1_LR-2	1006.5	4.96167	0.83	4.81021	0.151456	0.264081
305	8	01JH-13b 5M 9-1 CL dark core		9.33995	0.185539	-1.10662	8.223	0.259	2.68057	1.57309	1.70401	0.9125	2986	-2966	23	-18	-1858188	-190192	0.000735253	0.000216579	3643	01JH-13b 5M 9-1_LR-6	997.999	17.3716	0.83	17.3278	0.0438303	1.21315	17.2521	1.20572	1.21315	1.19829	0.0148613	1.23257
																						01JH-13b 5M 9-1_LR-7	998.247	17.2206	0.83	17.1764	0.0442126	1.19829
306	8	01JH-13b 5M 9-1 CL medium mantle		9.88456	0.185539	-1.10662	8.767	0.311	2.62657	1.55886	1.68493	0.915278	3035	-2962	23	-18	-1858188	-190192	0.000611564	9.28897e-05		01JH-13b 5M 9-1_LR-4	1004.18	6.08123	0.83	5.95724	0.12399	0.333325	6.27883	0.353178	0.373032	0.333325	0.0397072	11.2428		5M 9-1-2	4	core	110	100	0.9	0.17	0.0001	0.33555	0.00164	0.1326	0.0018	0.1870	0.0010
																						01JH-13b 5M 9-1_LR-5	1003.6	6.7129	0.83	6.60042	0.112481	0.373032
307	8	01JH-13b 5M 9-1 CL dark oscillatory rim		5.92618	0.185539	-1.10662	4.813	0.243	2.62913	1.55005	1.69615	0.917361	3057	-2964	22	-18	-1858188	-190192	0.000589068	7.03944e-05		01JH-13b 5M 9-1_LR-1	1002.8	8.09463	0.83	8.00113	0.0934968	0.463032	7.07391	0.403451	0.463032	0.371151	0.0918811	22.7738
																						01JH-13b 5M 9-1_LR-2	1003.48	6.6846	0.83	6.57165	0.11295	0.371151
																						01JH-13b 5M 9-1_LR-3	1003.85	6.76065	0.83	6.64895	0.111697	0.376171
189	1	5M 10-4.1		4.70675	0.297711		6.02	0.202	2.143	2.2379	0.957592	00:19	543	-2933							3631
190	1	5M 10-4.2		4.98775	0.297711		6.301	0.218	2.14844	2.24514	0.95693	00:23	599	-2900
308	8	01JH-13b 5M 10-4 no good CL		5.12229	0.185539	-1.10662	4.01	0.205	2.5766	1.54078	1.67226	0.920833	655	-3257	34	-20	-1858188	-190192	0.000520201	1.52728e-06		01JH-13b 5M 10-4_LR-3	1005.47	4.77462	0.83	4.61734	0.157277	0.25289	4.84571	0.266198	0.279507	0.25289	0.0266175	9.99913		5M 10-4-2	4	core	23	5	0.21	0.04	3e-05	0.33306	0.00228	0.1981	0.0061	0.0561	0.0010
																						01JH-13b 5M 10-4_LR-4	1005.37	5.21821	0.83	5.07407	0.14414	0.279507
309	8	01JH-13b 5M 10-4 no good CL rim		5.02518	0.185539	-1.10662	3.913	0.248	2.56392	1.53171	1.67389	0.922917	705	-3237	34	-20	-1858188	-190192	0.000515603	-3.07062e-06		01JH-13b 5M 10-4_LR-1	1006.31	4.13506	0.83	3.95399	0.181072	0.213966	3.92374	0.212243	0.213966	0.210521	0.00344545	1.62335
																						01JH-13b 5M 10-4_LR-2	1006.19	4.07709	0.83	3.8935	0.18359	0.210521
134	2	01JH-13b 5M 12-2 zrc		5.95373	0.40522	1.18024	7.141	0.221	2.63755	1.79973	1.46552	12:35	298	-2344	-17	0	-2635140	-51733	0.00103218	0.000329167	3395
314	8	01JH-13b 5M 12-2 intruding dark CL		6.11784	0.232029	-1.1836	4.927	0.277	2.49482	1.48242	1.68293	0.9375	-273	-3621	33	-22	-1858188	-190192	0.000662708	0.000127628		01JH-13b 5M 12-2_LR-5	1001.13	13.2925	0.83	13.2353	0.0571879	0.845916	13.2282	0.845103	0.845916	0.84429	0.00162561	0.192356
																						01JH-13b 5M 12-2_LR-6	1001.34	13.2783	0.83	13.2211	0.0572487	0.84429
315	8	01JH-13b 5M 12-2 CL darker oscillatory rim		6.0848	0.232029	-1.1836	4.894	0.237	2.49368	1.47832	1.68683	0.939583	-210	-3576	32	-21	-1858188	-190192	0.000898727	0.000363647		01JH-13b 5M 12-2_LR-1	1002.28	10.184	0.83	10.1095	0.0744869	0.607676	10.5996	0.643325	0.678974	0.607676	0.0712976	11.0827
																						01JH-13b 5M 12-2_LR-2	1001.42	11.1578	0.83	11.0898	0.0680394	0.678974
316	8	01JH-13b 5M 12-2 CL unintruded core		6.32609	0.232029	-1.1836	5.135	0.234	2.46018	1.47824	1.66427	0.942361	-338	-3583	33	-21	-1858188	-190192	0.000728599	0.000193518		01JH-13b 5M 12-2_LR-7	1003.89	8.41676	0.83	8.3268	0.0899572	0.48491	8.80313	0.517155	0.549401	0.48491	0.0644904	12.4702
																						01JH-13b 5M 12-2_LR-8	1003.19	9.36044	0.83	9.27946	0.0809766	0.549401
317	8	01JH-13b 5M 12-2 intruding dark CL core 2		5.87555	0.232029	-1.1836	4.685	0.249	2.44761	1.46955	1.66554	0.944444	-262	-3612	33	-21	-1858188	-190192	0.000758194	0.000223114		01JH-13b 5M 12-2_LR-3	1003.8	8.11385	0.83	8.02057	0.0932778	0.464351	10.5401	0.647844	0.831337	0.464351	0.366987	56.6474
																						01JH-13b 5M 12-2_LR-4	1002.11	13.1176	0.83	13.0597	0.0579451	0.831337
193	1	5M 13-2.1		5.71675	0.297711		7.03	0.246	2.14378	2.22343	0.964178	00:35	356	-3413							3738
194	1	5M 13-2.2		5.73775	0.297711		7.051	0.216	2.13074	2.23403	0.953765	00:39	458	-3407
135	2	01JH-13b 5M 13-2 zrc		5.81689	0.40522	1.18024	7.004	0.245	2.642	1.80806	1.46123	12:39	1009	-2443	-18	0	-2635140	-51733	0.000959675	0.000256664
318	8	01JH-13b 5M 13-2 CL darker rim		6.52833	0.232029	-1.1836	5.337	0.267	2.46194	1.47112	1.67352	0.947222	361	-3759	31	-25	-1858188	-190192	0.00063296	9.78788e-05
319	8	01JH-13b 5M 13-2 CL brighter core		6.01071	0.232029	-1.1836	4.82	0.251	2.48319	1.46537	1.69459	0.95	386	-3706	31	-22	-1858188	-190192	0.000666816	0.000131735																5M 13-2-2	4	core	64	36	0.56	0.25	0.00015	0.35715	0.00158	0.2011	0.0033	0.1470	0.0010
320	8	01JH-13b 5M 13-2 CL brighter core but more muddled		6.28504	0.232029	-1.1836	5.094	0.289	2.47309	1.46404	1.68923	0.952083	453	-3718	31	-22	-1858188	-190192	0.00054952	1.44391e-05
209	1	5M 22-4.1 core		6.35575	0.297711		7.669	0.304	2.15595	2.22523	0.968868	01:37	2417	-4777							3743
210	1	5M 22-4.2 rim		6.74475	0.297711		8.058	0.233	2.16997	2.24127	0.968191	01:41	2492	-4798
211	1	5M 22-4.3 core		6.01275	0.297711		7.326	0.17	2.14111	2.24893	0.952053	01:44	2379	-4773
212	1	5M 22-4.4 rim: burned out?		5.89575	0.297711		7.209	0.269	2.15773	2.24772	0.959962	01:47	2339	-4750
321	8	01JH-13b 5M 22-4 damaged rim?		6.48728	0.232029	-1.1836	5.296	0.25	2.46626	1.46138	1.68763	0.955556	2353	-5294	36	-34	-1858188	-190192	0.000539505	4.42414e-06		01JH-13b 5M 22-4_LR-1	1004.93	6.10394	0.83	5.9804	0.123535	0.334552	6.2825	0.353165	0.371778	0.334552	0.0372253	10.5405
																						01JH-13b 5M 22-4_LR-2	1004.1	6.69733	0.83	6.58459	0.112739	0.371778
322	8	01JH-13b 5M 22-4 brighter remnant oscillatory		6.38115	0.232029	-1.1836	5.19	0.232	2.48322	1.46189	1.69864	0.958333	2247	-5253	36	-33	-1858188	-190192	0.0015248	0.00098972		01JH-13b 5M 22-4_LR-5	1004.58	6.86244	0.83	6.75238	0.110062	0.382465	10.5195	0.6477	0.842666	0.382465	0.460201	71.0516
																						01JH-13b 5M 22-4_LR-6	1001.18	13.2537	0.83	13.1963	0.0573542	0.842666
																						01JH-13b 5M 22-4_LR-7	1000.65	11.6748	0.83	11.6098	0.06505	0.71797
323	8	01JH-13b 5M 22-4 no discernible CL change		6.48928	0.232029	-1.1836	5.298	0.286	2.50737	1.47018	1.70548	0.961111	2288	-5263	36	-33	-1858188	-190192	0.00173132	0.00119624		01JH-13b 5M 22-4_LR-3	1003.77	6.72625	0.83	6.61399	0.11226	0.373659	9.47581	0.573911	0.774163	0.373659	0.400503	69.785		5M 22-4-2	4	core	50	39	0.77	0.21	0.00013	0.35838	0.00166	0.2012	0.0033	0.1995	0.0014
																						01JH-13b 5M 22-4_LR-4	1001.79	12.3989	0.83	12.3376	0.0612791	0.774163
Mount: 01JH-36
428	1	115.1		5.6831	0.320974		7.172	0.222	2.17344	2.20102	0.987472	22:11	2649	-1972							4129
429	1	115.2		5.3121	0.320974		6.801	0.315	2.13958	2.23176	0.958694	22:14	2668	-1940
430	1	115.3		5.8001	0.320974		7.289	0.179	2.17561	2.23845	0.971924	22:17	2679	-1966
29	7	01JH-36 115 CsRes=120		5.4607	0.191111	-1.88341	3.567	0.17	2.3629	1.51743	1.55717	19:40	2961	-1570	8	-9	-2663124	-190544	0.000279023	0.000115439		01JH-36 115_LR-3	1002.73	10.0486	0.83	9.97312	0.0754815	0.597715	9.99312	0.599135	0.600556	0.597715	0.00284054	0.474106
																						01JH-36 115_LR-4	1002.44	10.0883	0.83	10.0131	0.0751871	0.600556
30	7	01JH-36 115 hit crack				-1.88341	3.668	0.174	2.37582	1.52408	1.55885	19:44	2947	-1560	8	-11	-2663124	-190544	0.00102668			01JH-36 115_LR-6	1001.69	12.194	0.83	12.1317	0.062301	0.757819	13.1059	0.856431	1.24122	0.57025	0.670974	78.3454
																						01JH-36 115_LR-7	1001.69	9.65918	0.83	9.58068	0.0784958	0.57025
																						01JH-36 115_LR-8_02	1000.2	17.6484	0.83	17.6053	0.0431464	1.24122
31	7	01JH-36 115		5.41261	0.191111	-1.88341	3.519	0.165	2.3748	1.52377	1.5585	19:48	2969	-1588	8	-11	-2663124	-190544	0.000271865	0.000108282		01JH-36 115_LR-1	1002.9	9.73097	0.83	9.65305	0.0779222	0.575149	9.70118	0.57866	0.582171	0.575149	0.00702196	1.21349
																						01JH-36 115_LR-2	1002.8	9.82649	0.83	9.74932	0.0771718	0.582171
32	7	01JH-36 115 hit inclusion				-1.88341	3.446	0.156	2.34982	1.5129	1.5532	19:51	2986	-1560	8	-12	-2663124	-190544	0.00033227			01JH-36 115_LR-3	1002.73	10.0486	0.83	9.97312	0.0754815	0.597715	10.0767	0.605082	0.616975	0.597715	0.0192601	3.18306
																						01JH-36 115_LR-4	1002.44	10.0883	0.83	10.0131	0.0751871	0.600556
																						01JH-36 115_LR-5	1002.3	10.3173	0.83	10.2438	0.0735331	0.616975
431	1	5.1		5.9271	0.320974		7.416	0.205	2.1755	2.21271	0.983184	22:21	2448	-2305							3652
432	1	5.2		6.2491	0.320974		7.738	0.242	2.10307	2.24166	0.938177	22:25	2412	-2336
87	6	01JH-36 5		5.97565	0.219206	-0.172621	5.802	0.185	2.77004	1.88172	1.47208	23:08	2711	-892	-8	9	-2650892	-52622	0.00231318	0.000272494		01JH-36 5_LR-7	1003.34	9.47689	0.83	9.3969	0.0799912	0.557712	9.17197	0.542536	0.584987	0.48491	0.100077	18.4462
																						01JH-36 5_LR-10	1002.98	9.86859	0.83	9.79174	0.0768456	0.584987
																						01JH-36 5_LR-11	1004.14	8.41723	0.83	8.32728	0.0899523	0.48491
88	6	01JH-36 5		5.89664	0.219206	-0.172621	5.723	0.213	2.78111	1.88821	1.47288	23:12	2666	-890	-9	8	-2650892	-52622	0.00229833	0.000257637		01JH-36 5_LR-4	1002.84	11.0658	0.83	10.9972	0.0686004	0.672309	9.17162	0.544665	0.672309	0.434264	0.238045	43.7048
																						01JH-36 5_LR-5	1003.53	9.04234	0.83	8.95854	0.0837965	0.527421
																						01JH-36 5_LR-6	1004.52	7.65787	0.83	7.5591	0.0987658	0.434264
89	6	01JH-36 5		5.85263	0.219206	-0.172621	5.679	0.182	2.76896	1.88817	1.46648	23:15	2690	-926	-9	8	-2650892	-52622	0.00258829	0.000547597		01JH-36 5_LR-1	1000.62	15.1512	0.83	15.101	0.0502147	1.00381	15.3284	1.03434	1.28312	0.816074	0.467048	45.1543
																						01JH-36 5_LR-2	1000.72	12.9243	0.83	12.8655	0.0588056	0.816074
																						01JH-36 5_LR-3	999.546	18.061	0.83	18.0188	0.0421658	1.28312
33	7	01JH-36 5		6.10391	0.191111	-1.88341	4.209	0.193	2.30221	1.48305	1.55235	19:55	2739	-1937	10	-12	-2663124	-190544	0.000342211	0.000178627		01JH-36 5_LR-7	1003.34	9.47689	0.83	9.3969	0.0799912	0.557712	8.80001	0.517348	0.557712	0.452518	0.105193	20.3331
																						01JH-36 5_LR-8	1003.46	9.24992	0.83	9.16799	0.0819346	0.541815
																						01JH-36 5_LR-9	1004.52	7.93056	0.83	7.83515	0.0954089	0.452518
34	7	01JH-36 5		5.73822	0.191111	-1.88341	3.844	0.136	2.29442	1.46776	1.56321	19:59	2773	-1943	10	-14	-2663124	-190544	0.000254838	9.12546e-05		01JH-36 5_LR-9	1004.52	7.93056	0.83	7.83515	0.0954089	0.452518	7.59425	0.437238	0.48491	0.374287	0.110624	25.3005
																						01JH-36 5_LR-11	1004.14	8.41723	0.83	8.32728	0.0899523	0.48491
																						01JH-36 5_LR-12	1004.95	6.73248	0.83	6.62032	0.112158	0.374287
35	7	01JH-36 5		5.96565	0.191111	-1.88341	4.071	0.214	2.27494	1.45712	1.56126	20:02	2750	-1962	10	-14	-2663124	-190544	0.00114307	0.000979483		01JH-36 5_LR-10	1002.98	9.86859	0.83	9.79174	0.0768456	0.584987	12.6902	0.817961	1.15924	0.584987	0.574257	70.206
																						01JH-36 5_LR-13_02	1000.11	16.8225	0.83	16.7772	0.0452531	1.15924
																						01JH-36 5_LR-14	1001.72	11.5672	0.83	11.5015	0.0656503	0.709651
437	1	69.1 core		4.72512	0.343976		6.091	0.219	2.14398	2.20818	0.970929	23:19	3546	-1062							4383
438	1	69.2 core		4.47212	0.343976		5.838	0.2	2.13712	2.2063	0.968645	23:23	3623	-1039
439	1	69.3 core		4.94412	0.343976		6.31	0.202	2.15668	2.21647	0.973027	23:26	3605	-1072
440	1	69.4 core		4.78012	0.343976		6.146	0.251	2.1407	2.21107	0.968175	23:30	3489	-1083
441	1	69.5 rim		5.72612	0.343976		7.092	0.196	2.13827	2.20998	0.967552	23:34	3578	-836
442	1	69.6 rim		5.35712	0.343976		6.723	0.316	2.09586	2.20657	0.949826	23:39	3667	-965
443	1	69.7 rim		5.86812	0.343976		7.234	0.245	2.12647	2.20395	0.964845	23:43	3611	-864
444	1	69.8 rim		5.46812	0.343976		6.834	0.236	2.12822	2.19734	0.968543	23:48	3470	-903
445	1	69.9		3.53612	0.343976		4.902	0.21	2.13783	2.18702	0.97751	23:53	3598	-902
446	1	69.1		4.99612	0.343976		6.362	0.22	2.12812	2.19374	0.970086	23:57	3496	-1142
447	1	69.11		4.81412	0.343976		6.18	0.267	2.09575	2.18342	0.959849	00:02	3666	-1035
90	6	01JH-36 69 U-Pb domain		4.67143	0.219206	-0.172621	4.498	0.227	2.76466	1.87788	1.47222	23:19	3864	277	-8	12	-2650892	-52622	0.00241364	0.000372952		01JH-36 5M 69_LR-18	1003.16	8.59986	0.83	8.5118	0.0880623	0.496955	13.0833	0.874737	1.34089	0.475596	0.865289	98.9199
																						01JH-36 5M 69_LR-18b	1002.98	8.28613	0.83	8.19477	0.0913598	0.475596
																						01JH-36 5M 69_LR-19_02	998.963	17.0986	0.83	17.0541	0.0445263	1.18551
																						01JH-36 5M 69_LR-19b	998.09	18.6136	0.83	18.5727	0.0409201	1.34089
91	6	01JH-36 69 dark CL domain		3.23218	0.219206	-0.172621	3.059	0.231	2.77445	1.87863	1.47685	23:23	3773	482	-8	8	-2650892	-52622	0.0024541	0.000413411		01JH-36 5M 69_LR-3	1000.9	12.9892	0.83	12.9307	0.0585139	0.82088	12.9867	0.825302	0.829724	0.82088	0.00884417	1.07163
																						01JH-36 5M 69_LR-4	1000.46	13.1008	0.83	13.0428	0.0580189	0.829724
24	7	01JH-36 69		4.37866	0.191111	-1.88341	2.487	0.174	2.32011	1.47945	1.56823	19:16	3850	-649	5	-7	-2663124	-190544	0.000392091	0.000228507		01JH-36 5M 69_LR-9	1001.45	11.9801	0.83	11.9167	0.0634049	0.741621	12.0696	0.753213	0.764806	0.741621	0.0231844	3.07806		69-2	1	core	136	94	0.69	0.11	7e-05	0.54424	0.00193	0.2421	0.0029	0.1793	0.0014
																						01JH-36 5M 69_LR-10	1001.48	12.2844	0.83	12.2226	0.061846	0.764806
25	7	01JH-36 69		4.18329	0.191111	-1.88341	2.292	0.204	2.2917	1.4692	1.55982	19:20	3856	-599	4	-9	-2663124	-190544	0.000443793	0.00028021		01JH-36 5M 69_LR-13	1000.83	12.4891	0.83	12.4283	0.0608397	0.781212	12.681	0.801046	0.82088	0.781212	0.0396682	4.95205
																						01JH-36 5M 69_LR-14	1000.54	12.9922	0.83	12.9337	0.0585004	0.82088
26	7	01JH-36 69		4.36564	0.191111	-1.88341	2.474	0.209	2.25121	1.45082	1.55169	19:23	3874	-594	4	-9	-2663124	-190544	0.000493191	0.000329608		01JH-36 5M 69_LR-14	1000.54	12.9922	0.83	12.9337	0.0585004	0.82088	13.2957	0.850975	0.923155	0.808889	0.114266	13.4277
																						01JH-36 5M 69_LR-15_02	1000.68	12.8392	0.83	12.78	0.0591926	0.808889
																						01JH-36 5M 69_LR-15b	1001.25	14.2268	0.83	14.1733	0.0534565	0.923155
27	7	01JH-36 69		4.5039	0.191111	-1.88341	2.612	0.216	2.21363	1.42606	1.55227	19:27	3869	-679	5	-8	-2663124	-190544	0.000549844	0.000386261		01JH-36 5M 69_LR-7	1001.84	10.8991	0.83	10.8295	0.0696408	0.659785	10.9109	0.665677	0.67157	0.659785	0.0117849	1.77036		69-2	1	core	136	94	0.69	0.11	7e-05	0.54424	0.00193	0.2421	0.0029	0.1793	0.0014
																						01JH-36 5M 69_LR-8	1002.56	11.0609	0.83	10.9923	0.0686305	0.67157
28	7	01JH-36 69		4.71129	0.191111	-1.88341	2.819	0.108	2.16351	1.39625	1.54951	19:31	3864	-696	4	-9	-2663124	-190544	0.000436437	0.000272853		01JH-36 5M 69_LR-5	1001.45	11.6913	0.83	11.6263	0.0649589	0.719487	12.2131	0.764985	0.810483	0.719487	0.0909964	11.8952		69-2	1	core	136	94	0.69	0.11	7e-05	0.54424	0.00193	0.2421	0.0029	0.1793	0.0014
																						01JH-36 5M 69_LR-6	1001.13	12.859	0.83	12.7999	0.0591021	0.810483
338	8	01JH-36 5M 69 relatively CL dark disc rim		4.52643	0.148947	-1.00986	3.512	0.223	2.29273	1.38976	1.64973	0.0111111	4904	-667	4	17	-1858188	-190192	0.000824004	0.000537916		01JH-36 5M 69_LR-1_02	1001.94	11.865	0.83	11.801	0.0640152	0.732429	11.8331	0.735108	0.737786	0.732429	0.00535621	0.72863
																						01JH-36 5M 69_LR-2	1001.94	11.9288	0.83	11.8651	0.0636755	0.737786
339	8	01JH-36 5M 69 relatively CL dark bleb		3.9048	0.148947	-1.00986	2.891	0.262	2.24752	1.3589	1.65393	0.0138889	4916	-368	5	16	-1858188	-190192	0.000799626	0.000513538		01JH-36 5M 69_LR-16	1002.41	9.80456	0.83	9.72722	0.0773428	0.580764	11.0041	0.674893	0.800938	0.580764	0.220174	32.6235
																						01JH-36 5M 69_LR-16b	1001.38	12.7426	0.83	12.683	0.0596381	0.800938
																						01JH-36 5M 69_LR-17	1001.94	10.6733	0.83	10.6022	0.0711015	0.642976
340	8	01JH-36 10M 56-2 oscillatory core, Cs-res 124		5.25316	0.148947	-1.00986	4.238	0.193	2.45334	1.4489	1.69324	0.0243056	-1453	-1355	0	15	-1858188	-190192	0.00125188	0.000965788	3586
341	8	01JH-36 10M 56-2 oscillatory rim		5.86178	0.148947	-1.00986	4.846	0.251	2.43739	1.44562	1.68606	0.0270833	-1364	-1388	-2	14	-1858188	-190192	0.00265711	0.00237102
342	8	01JH-36 10M 57 bright CL core remnant?		4.83975	0.148947	-1.00986	3.825	0.266	2.41842	1.44088	1.67843	0.0291667	-1381	-1143	-1	15	-1858188	-190192	0.000669856	0.000383768		01JH-36 10M 57_LR-3	1002.13	10.1396	0.83	10.0648	0.0748102	0.604113	10.0858	0.605895	0.607676	0.604113	0.00356387	0.5882
																						01JH-36 10M 57_LR-4_03	1002.14	10.1814	0.83	10.1069	0.0745058	0.607676
343	8	01JH-36 10M 57 darker CL remnant banding		4.86077	0.148947	-1.00986	3.846	0.29	2.42363	1.44131	1.68154	0.0319444	-1426	-1119	-2	15	-1858188	-190192	0.000885248	0.000599159		01JH-36 10M 57_LR-1_03	998.314	17.6158	0.83	17.5726	0.0432259	1.23719	20.3906	1.57793	1.91868	1.23719	0.681494	43.189
																						01JH-36 10M 57_LR-2	996.54	23.2414	0.83	23.2086	0.0328044	1.91868
344	8	01JH-36 10M 57 CL damaged core?		4.9939	0.148947	-1.00986	3.979	0.214	2.42202	1.43615	1.68647	0.0340278	-1453	-1149	-2	15	-1858188	-190192	0.00105871	0.000772624		01JH-36 10M 57_LR-5_02	997.292	20.0355	0.83	19.9975	0.0380294	1.50025	18.7731	1.36771	1.50025	1.23517	0.265078	19.3811
																						01JH-36 10M 57_LR-6	998.687	17.5921	0.83	17.5488	0.0432838	1.23517
345	8	01JH-36 10M 59 oscillatory rim		5.4904	0.148947	-1.00986	4.475	0.214	2.41589	1.43423	1.68445	0.0368056	-1888	-906	0	15	-1858188	-190192	0.000834215	0.000548126
346	8	01JH-36 10M 59 less oscillatory core		5.63555	0.148947	-1.00986	4.62	0.272	2.40724	1.4297	1.68375	0.0388889	-1894	-835	0	15	-1858188	-190192	0.000882363	0.000596275
347	8	01JH-36 10M 60 heavily damaged core		7.96891	0.148947	-1.00986	6.951	0.186	2.44753	1.41929	1.72447	0.0416667	-1821	44	1	17	-1858188	-190192	0.0124478	0.0121617		01JH-36 10M 60_LR-3_02	1000.13	20.064	0.83	20.026	0.0379756	1.50375	21.6318	1.71341	1.92308	1.50375	0.419336	24.4737
																						01JH-36 10M 60_LR-4	997.569	23.2703	0.83	23.2375	0.0327638	1.92308
348	8	01JH-36 10M 60 CL bright lower portion		4.9889	0.148947	-1.00986	3.974	0.191	2.37445	1.41823	1.67423	0.0444444	-1808	-100	0	17	-1858188	-190192	0.000614109	0.000328021		01JH-36 10M 60_LR-1	1002.68	9.9492	0.83	9.87297	0.0762287	0.590633	9.24503	0.547494	0.590633	0.504356	0.0862774	15.7586
																						01JH-36 10M 60_LR-2	1003.17	8.70411	0.83	8.61709	0.0870186	0.504356
349	8	01JH-36 10M 60 CL dark not as damaged		5.46538	0.148947	-1.00986	4.45	0.23	2.37735	1.41749	1.67715	0.0465278	-1863	60	1	17	-1858188	-190192	0.00164462	0.00135853		01JH-36 10M 60_LR-5	996.551	22.4088	0.83	22.3748	0.0340182	1.79957	22.1825	1.77385	1.79957	1.74814	0.0514275	2.89919
																						01JH-36 10M 60_LR-6	996.216	22.0248	0.83	21.9902	0.0346088	1.74814
350	8	01JH-36 10M 225 mottled core		6.54947	0.148947	-1.00986	5.533	0.323	2.33174	1.40963	1.65415	0.0493056	-1822	503	2	19	-1858188	-190192	0.00999344	0.00970735		01JH-36 10M 225_LR-3	998.518	20.9645	0.83	20.9281	0.0363515	1.61191	22.0979	1.7697	1.92749	1.61191	0.31558	17.8323
																						01JH-36 10M 225_LR-4	996.949	23.3004	0.83	23.2677	0.0327216	1.92749
351	8	01JH-36 10M 225 oscillatory rim		5.3863	0.148947	-1.00986	4.371	0.199	2.36173	1.40642	1.67925	0.0513889	-1894	460	2	19	-1858188	-190192	0.000865713	0.000579625		01JH-36 10M 225_LR-1	999.571	15.6717	0.83	15.6231	0.0485567	1.05052	17.9159	1.28707	1.60944	1.05052	0.558917	43.4255
																						01JH-36 10M 225_LR-2	998.655	17.2578	0.83	17.2137	0.0441178	1.20125
																						01JH-36 10M 225_LR-2b	998.786	20.9474	0.83	20.911	0.0363811	1.60944
372	8	01JH-36 2.5M 174 oscillatory core		5.61553	0.288765	-1.00986	4.6	0.173	2.49759	1.48692	1.6797	0.124306	5314	-3291	10	16	-1858188	-190192	0.000731027	0.000452592		01JH-36 2.5M 174_LR-1_02	1000.4	15.3129	0.83	15.2632	0.0496877	1.01806	15.4121	1.03157	1.04507	1.01806	0.0270123	2.61857
																						01JH-36 2.5M 174_LR-2	1000.22	15.6097	0.83	15.561	0.0487485	1.04507
373	8	01JH-36 2.5M 174 less oscillatory core		5.4864	0.288765	-1.00986	4.471	0.225	2.48148	1.48172	1.67473	0.126389	5343	-3364	11	17	-1858188	-190192	0.00067794	0.000399505		01JH-36 2.5M 174_LR-3	1002.81	10.2331	0.83	10.159	0.0741327	0.611247	10.652	0.646967	0.682688	0.611247	0.0714403	11.0423
																						01JH-36 2.5M 174_LR-4	1002.35	11.2127	0.83	11.145	0.067709	0.682688
374	8	01JH-36 2.5M 35 oscillatory core		5.63755	0.288765	-1.00986	4.622	0.215	2.46631	1.47155	1.67599	0.129167	5209	-4246	13	16	-1858188	-190192	0.00055479	0.000276355		01JH-36 2.5M 35_LR-3	1002.59	8.99169	0.83	8.90743	0.0842637	0.524011	9.55425	0.56906	0.614109	0.524011	0.090098	15.8328
																						01JH-36 2.5M 35_LR-4_02	1001.81	10.2749	0.83	10.2011	0.0738338	0.614109
375	8	01JH-36 2.5M 35 oscillatory rim		5.6846	0.288765	-1.00986	4.669	0.22	2.45255	1.46568	1.67331	0.131944	5317	-4185	14	16	-1858188	-190192	0.000455822	0.000177387		01JH-36 2.5M 35_LR-1	1004.86	6.43895	0.83	6.32175	0.117199	0.355553	6.82999	0.387801	0.420049	0.355553	0.0644956	16.6311
																						01JH-36 2.5M 35_LR-2	1005.13	7.43986	0.83	7.33824	0.101625	0.420049
376	8	01JH-36 2.5M Un 2 oscillatory core (mineralized fracture)		6.09001	0.288765	-1.00986	5.074	0.197	2.43023	1.45645	1.6686	0.134028	5628	-4265	15	19	-1858188	-190192	0.000541502	0.000263067		01JH-36 2.5M Un 2_LR-1_02	1005.59	5.7756	0.83	5.64515	0.130448	0.314398	5.66706	0.315614	0.316829	0.314398	0.00243109	0.770274
																						01JH-36 2.5M Un 2_LR-2	1005.79	5.81847	0.83	5.68897	0.129502	0.316829
378	8	01JH-36 2.5M31 relatively oscillatory core		4.66357	0.288765	-1.00986	3.649	0.237	2.42449	1.43646	1.68782	0.140278	4609	-3262	7	14	-1858188	-190192	0.000690666	0.000412231		01JH-36 2.5M 31_LR-1	1003.04	10.001	0.83	9.92516	0.0758375	0.594879	10.0723	0.60521	0.615542	0.594879	0.0206626	3.41412
																						01JH-36 2.5M 31_LR-2	1002.85	10.2932	0.83	10.2195	0.0737037	0.615542
379	8	01JH-36 2.5M31 relatively oscillatory rim		5.52744	0.288765	-1.00986	4.512	0.216	2.40109	1.43416	1.67422	0.142361	4510	-3222	7	13	-1858188	-190192	0.00129228	0.00101384		01JH-36 2.5M 31_LR-3	1003.01	10.0469	0.83	9.97141	0.0754942	0.597715	10.0123	0.600728	0.632821	0.571648	0.0611727	10.1831
																						01JH-36 2.5M 31_LR-3b	1002.97	10.5344	0.83	10.4624	0.0720308	0.632821
																						01JH-36 2.5M 31_LR-4	1002.59	9.68139	0.83	9.60307	0.0783175	0.571648
380	8	01JH-36 10M 224 very damaged area		5.46938	0.288765	-1.00986	4.454	0.21	2.40537	1.43118	1.68068	0.145833	-1872	697	-2	20	-1858188	-190192	0.00132815	0.00104972		01JH-36 10M 224_LR-1	996.388	24.3314	0.83	24.3001	0.0313403	2.08585	24.3422	2.0923	2.09875	2.08585	0.0128956	0.616336
																						01JH-36 10M 224_LR-2	995.53	24.4156	0.83	24.3844	0.0312327	2.09875
381	8	01JH-36 10M 224 equally bad area		5.40932	0.288765	-1.00986	4.394	0.21	2.40223	1.42743	1.68291	0.148611	-1823	719	-1	20	-1858188	-190192	0.000915	0.000636565		01JH-36 10M 224_LR-3	995.639	23.3119	0.83	23.2792	0.0327055	1.92897	20.4724	1.58813	1.92897	1.24729	0.681673	42.9229
																						01JH-36 10M 224_LR-4	996.695	17.7086	0.83	17.6656	0.0430005	1.24729
382	8	01JH-36 5M 86-2 CL dark core		4.97188	0.288765	-1.00986	3.957	0.251	2.39958	1.42046	1.68929	0.151389	593	1115	-4	19	-1858188	-190192	0.00105737	0.000778938	3681	01JH-36 5M 86_LR-1_02	997.832	18.5579	0.83	18.5169	0.0410423	1.33556	18.5731	1.34143	1.3473	1.33556	0.0117413	0.875282
																						01JH-36 5M 86_LR-2	997.83	18.6702	0.83	18.6294	0.0407967	1.3473
383	8	01JH-36 5M 86-2 CL oscillatory area		5.11302	0.288765	-1.00986	4.098	0.226	2.36284	1.41581	1.6689	0.153472	530	1190	-3	20	-1858188	-190192	0.000603588	0.000325153		01JH-36 5M 86_LR-3_02	1001.71	11.9265	0.83	11.8628	0.0636877	0.73702	11.1168	0.681671	0.73702	0.626322	0.110698	16.2392
																						01JH-36 5M 86_LR-4	1001.62	10.4435	0.83	10.3708	0.0726523	0.626322
Mount: 01JH-42
406	8	01JH-42a 2.5NM Un 3 dark CL sector zoned		6.7856	0.345131	-1.97619	4.796	0.225	2.36784	1.40904	1.68046	0.231944	-1983	135	7	9	-1858188	-190192	0.00090011	0.000388627		01JH-42 2.5NM Un 3b_LR-5	995.582	19.6886	0.83	19.6499	0.0386963	1.4599	20.0545	1.50725	1.5546	1.4599	0.0947	6.28297
																						01JH-42 2.5NM Un 3b_LR-6	996.081	20.4962	0.83	20.459	0.0371784	1.5546
407	8	01JH-42a 2.5NM Un 3 bright remnant oscillatory Cs-res 127		7.04612	0.345131	-1.97619	5.056	0.227	2.49776	1.47088	1.69814	0.236111	-2118	223	7	9	-1858188	-190192	0.000802508	0.000291024		01JH-42 2.5NM Un 3b_LR-3	1000.71	12.3483	0.83	12.2868	0.0615283	0.7703	13.0076	0.82825	0.8862	0.7703	0.1159	13.9934
																						01JH-42 2.5NM Un 3b_LR-4	999.176	13.7836	0.83	13.7284	0.0551639	0.8862
408	8	01JH-42a 2.5NM Un 3 medium dark CL sector zoned				-1.97619	5.152	20.785	0.0129025	0.740391	0.0174267	0.238889	-2161	191	-1	8	-1858188	-190192	0.0300976			01JH-42 2.5NM Un 3b_LR-1_02	998.449	16.2857	0.83	16.239	0.0467364	1.1078	16.5183	1.1345	1.1612	1.1078	0.0534	4.70692
																						01JH-42 2.5NM Un 3b_LR-2_02	998.473	16.8429	0.83	16.7977	0.0451986	1.1612
410	8	01JH-42a 2.5NM 75 non-damaged area		6.55815	0.345131	-1.97619	4.569	0.239	2.03491	1.19567	1.7019	0.253472	-1777	86	1	10	-1858188	-190192	0.000966917	0.000455434	3948	01JH-42 2.5NM 75_LR-1_02	995.753	21.564	0.83	21.5287	0.0353452	1.6878	19.3968	1.4475	1.6878	1.2072	0.4806	33.2021		75b	7	u	217	66	0.3	0.13	7e-05	0.41039	0.00246	0.1290	0.0028	0.0771	0.0012
																						01JH-42 2.5NM 75_LR-2_02	997.797	17.309	0.83	17.265	0.043988	1.2072
411	8	01JH-42a 2.5NM 69 oscillatory core Cs-res 129		6.75454	0.345131	-1.97619	4.765	0.268	2.43926	1.42371	1.71331	0.258333	-1808	472	2	11	-1858188	-190192	0.000738884	0.0002274	3940	01JH-42 2.5NM 69_LR-3	1000.11	14.0994	0.83	14.0455	0.0539364	0.913	14.049	0.913267	0.9155	0.9113	0.0042	0.459888		69d	7	c	306	112	0.37	0	0	0.40830	0.00122	0.1724	0.0014	0.0955	0.0006
																						01JH-42 2.5NM 69_LR-4	1000.32	14.1298	0.83	14.076	0.0538211	0.9155
																						01JH-42 2.5NM 69_LR-5	1000.2	14.0796	0.83	14.0256	0.0540117	0.9113
412	8	01JH-42a 2.5NM 69 non-oscillatory rim		6.79562	0.345131	-1.97619	4.806	0.26	2.53692	1.50632	1.68418	0.260417	-1705	499	3	12	-1858188	-190192	0.000637754	0.000126271		01JH-42 2.5NM 69_LR-1	1001.66	12.4414	0.83	12.3803	0.0610713	0.7773	12.0767	0.7537	0.7773	0.7301	0.0472	6.26244		69b	7	c	176	58	0.33	0	0	0.40308	0.00161	0.1692	0.0020	0.0829	0.0008
																						01JH-42 2.5NM 69_LR-2	1001.53	11.8373	0.83	11.7731	0.0641639	0.7301
413	8	01JH-42a 2.5NM Un 1 oscillatory mantle		7.05614	0.345131	-1.97619	5.066	0.217	2.69476	1.58197	1.70342	0.263194	-1239	863	1	13	-1858188	-190192	0.000630938	0.000119454		01JH-42 2.5NM Un 1_LR-6	1004.96	6.42697	0.83	6.30956	0.117414	0.3549
																						01JH-42 2.5NM Un 1_LR-7	1004.34	7.56867	0.83	7.46875	0.0999158	0.4284
																						01JH-42 2.5NM Un 1_LR-8	1003.86	8.56176	0.83	8.47331	0.08845	0.4943
414	8	01JH-42a 2.5NM Un 1 wavy intrusion into oscillatory		6.71246	0.345131	-1.97619	4.723	0.27	2.82406	1.66099	1.70023	0.265972	-1226	688	1	12	-1858188	-190192	0.000610814	9.933e-05		01JH-42 2.5NM Un 1_LR-1	1003.46	7.54002	0.83	7.43973	0.100291	0.4265	8.64833	0.508733	0.6393	0.4265	0.2128	41.8294
																						01JH-42 2.5NM Un 1_LR-2	1003.75	8.05111	0.83	7.95711	0.0939965	0.4604
																						01JH-42 2.5NM Un 1_LR-3	1002.64	10.6196	0.83	10.5481	0.0714579	0.6393
415	8	01JH-42a 2.5NM Un 1 CL darker core		6.92387	0.345131	-1.97619	4.934	0.21	2.94977	1.73891	1.69634	0.268056	-1218	816	1	13	-1858188	-190192	0.000644846	0.000133362		01JH-42 2.5NM Un 1_LR-4	1004.79	7.16708	0.83	7.06164	0.105443	0.4021	6.86378	0.38975	0.4021	0.3774	0.0247	6.3374
																						01JH-42 2.5NM Un 1_LR-5	1004.88	6.77734	0.83	6.66591	0.111426	0.3774
416	8	01JH-42a 2.5NM Un 3 darker CL core Cs-Res 128		6.50805	0.345131	-1.97619	4.519	0.261	3.05638	1.81463	1.68429	0.272917	-1658	2155	4	17	-1858188	-190192	0.000621709	0.000110225		01JH-42 2.5NM Un 3_LR-5	1001.61	11.91	0.83	11.8462	0.0637752	0.7363	10.7593	0.656433	0.7363	0.5473	0.189	28.792
																						01JH-42 2.5NM Un 3_LR-6	1002.34	9.33528	0.83	9.25409	0.0811927	0.5473
																						01JH-42 2.5NM Un 3_LR-7	1001.7	11.2452	0.83	11.1777	0.0675149	0.6857
417	8	01JH-42a 2.5NM Un 3 oscillatory rim		6.39683	0.345131	-1.97619	4.408	0.301	3.15797	1.87026	1.68852	0.275	-1615	2143	4	16	-1858188	-190192	0.000663953	0.000152469		01JH-42 2.5NM Un 3_LR-1_02	1001.06	12.6197	0.83	12.5595	0.0602147	0.7914	12.0073	0.7498	0.8402	0.6466	0.1936	25.8202
																						01JH-42 2.5NM Un 3_LR-2	1001.22	13.2277	0.83	13.1702	0.0574661	0.8402
																						01JH-42 2.5NM Un 3_LR-3	1001.21	11.7121	0.83	11.6473	0.0648444	0.721
																						01JH-42 2.5NM Un 3_LR-4	1001.16	10.723	0.83	10.6522	0.0707747	0.6466
Mount: 01JH-47/113
356	8	01JH-113 un 1 mottled core		4.95586	0.319074	-1.00986	3.941	0.289	2.35893	1.42207	1.6588	0.0701389	-1000	205	13	-5	-1858188	-190192	0.00337265	0.00309297		01JH-47/113 un1_LR-5_02	994.22	25.7075	0.83	25.6778	0.0296687	2.3222	25.7879	2.34257	2.3723	2.3222	0.0501	2.13868
																						01JH-47/113 un1_LR-6	994.175	25.9751	0.83	25.9457	0.0293641	2.3723
																						01JH-47/113 un1_LR-7	995.125	25.7696	0.83	25.74	0.0295975	2.3332
357	8	01JH-113 un 1 mottled rim		5.4834	0.319074	-1.00986	4.468	0.219	2.34977	1.37	1.71515	0.0729167	-926	151	9	-8	-1858188	-190192	0.00172369	0.00144402		01JH-47/113 un1_LR-1_02	996.01	32.509	0.83	32.4855	0.023479	4.4191	27.9902	3.03097	4.4191	2.2365	2.1826	72.01
																						01JH-47/113 un1_LR-1b	993.654	26.314	0.83	26.285	0.0289873	2.4373
																						01JH-47/113 un1_LR-2	993.173	25.2302	0.83	25.2	0.0302279	2.2365
358	8	01JH-113 un 1 mottled core 2		5.60152	0.319074	-1.00986	4.586	0.186	2.35753	1.38315	1.70446	0.075	-954	177	9	-8	-1858188	-190192	0.00107277	0.000793103		01JH-47/113 un1_LR-3	996.258	18.3581	0.83	18.3166	0.0414868	1.3144	18.4743	1.33085	1.3473	1.3144	0.0329	2.4721
																						01JH-47/113 un1_LR-4	998.229	18.6727	0.83	18.6319	0.0407912	1.3473
359	8	01JH-113 un 2 intruding CL into core Cs-res 125		4.60151	0.319074	-1.00986	3.587	0.288	2.53245	1.46689	1.72641	0.0791667	-1155	-10	9	-8	-1858188	-190192	0.000976512	0.000696841		01JH-47/113 un2_LR-1	996.961	23.5588	0.83	23.5264	0.0323641	1.9662	22.7986	1.8625	1.9662	1.7588	0.2074	11.1356
																						01JH-47/113 un2_LR-2_03	996.096	22.1053	0.83	22.0708	0.0344833	1.7588
360	8	01JH-113 un 2 bright oscillatory rim		5.41433	0.319074	-1.00986	4.399	0.239	2.56735	1.4994	1.71225	0.08125	-1142	81	9	-8	-1858188	-190192	0.000805341	0.00052567		01JH-47/113 un2_LR-3	1001.59	11.2714	0.83	11.204	0.0673592	0.6872	11.6103	0.720433	0.8492	0.6249	0.2243	31.134
																						01JH-47/113 un2_LR-4	1000.57	13.3343	0.83	13.2773	0.0570099	0.8492
																						01JH-47/113 un2_LR-5	1001.78	10.4224	0.83	10.3496	0.0727981	0.6249
361	8	01JH-113 un 3 damaged core		5.1881	0.319074	-1.00986	4.173	0.262	2.5798	1.51344	1.70459	0.0847222	-1522	-720	12	-11	-1858188	-190192	0.00263472	0.00235504		01JH-47/113 un3_LR-3_02	994.81	22.48	0.83	22.4461	0.0339109	1.8106	20.068	1.52995	1.8106	1.2493	0.5613	36.6875
																						01JH-47/113 un3_LR-4	996.453	17.7328	0.83	17.6899	0.0429421	1.2493
362	8	01JH-113 un 3 heavily damaged rim		4.9959	0.319074	-1.00986	3.981	0.256	2.61062	1.52342	1.71366	0.0868056	-1473	-780	12	-11	-1858188	-190192	0.00291698	0.00263731		01JH-47/113 un3_LR-1	995.597	23.0805	0.83	23.0475	0.0330321	1.8954	23.8501	2.0192	2.143	1.8954	0.2476	12.2623
																						01JH-47/113 un3_LR-2	994.924	24.6836	0.83	24.6527	0.0308948	2.143
363	8	01JH-113 un 3 relatively oscillatory area		5.27018	0.319074	-1.00986	4.255	0.196	2.60488	1.52338	1.70994	0.0895833	-1580	-682	12	-11	-1858188	-190192	0.0012238	0.00094413		01JH-47/113 un3_LR-5	996.425	22.9688	0.83	22.9356	0.0331921	1.8795	21.1704	1.65615	1.8795	1.4328	0.4467	26.9722
																						01JH-47/113 un3_LR-6	997.27	19.4443	0.83	19.4051	0.0391802	1.4328
364	8	(01JH-47b 2 relatively damaged area)		1.38826	0.319074	-1.00986	0.377	0.16	2.61889	1.52893	1.71288	0.0944444	-461	1567	5	-4	-1858188	-190192	0.00540465	0.00512498	2724	01JH-47b 2_LR-4_02	995.454	21.4009	0.83	21.3653	0.0356135	1.6672	22.8194	1.8741	2.081	1.6672	0.4138	22.0799
																						01JH-47b 2_LR-5	996.629	24.3049	0.83	24.2735	0.0313744	2.081
365	8	(01JH-47b 2 relatively oscillatory area)		0.880749	0.319074	-1.00986	-0.13	0.237	2.56411	1.52776	1.67835	0.0972222	-478	1532	5	-4	-1858188	-190192	0.000625467	0.000345796		01JH-47b 2_LR-1_02	1000.81	12.2742	0.83	12.2123	0.061897	0.764	11.3405	0.698867	0.764	0.6063	0.1577	22.5651
																						01JH-47b 2_LR-2	1000.48	11.783	0.83	11.7185	0.0644573	0.7263
																						01JH-47b 2_LR-3	1001.67	10.1653	0.83	10.0907	0.0746227	0.6063
366	8	(01JH-47b 3 relatively oscillatory area)		4.50441	0.319074	-1.00986	3.49	0.237	2.57996	1.52631	1.69033	0.1	-277	1602	5	-4	-1858188	-190192	0.000717976	0.000438306	2504	01JH-47b 3_LR-1	1000.47	11.3023	0.83	11.2351	0.0671765	0.6901	12.3564	0.777333	0.8895	0.6901	0.1994	25.6518
																						01JH-47b 3_LR-2	999.294	12.1275	0.83	12.0649	0.0626401	0.7524
																						01JH-47b 3_LR-3	999.536	13.8241	0.83	13.7691	0.0550034	0.8895
367	8	(01JH-47b 3 no CL zoning)		3.88478	0.319074	-1.00986	2.871	0.204	2.58476	1.52252	1.69769	0.102778	-267	1622	4	-4	-1858188	-190192	0.00078915	0.000509479		01JH-47b 3_LR-4	999.872	13.0584	0.83	13.0002	0.0582059	0.8265	16.0147	1.10855	1.3906	0.8265	0.5641	50.8863
																						01JH-47b 3_LR-5	997.112	19.0691	0.83	19.0292	0.0399474	1.3906
Mount: 01JH-54a
396	4	01JH-54a 10M D2		6.42267	0.285266	0.342134	6.767	0.292	2.91419	1.9486	1.49553	15:59	2600	-826	-22	-2	-1826420	-51742	0.000873343	0.000137976	4042
397	4	01JH-54a 10M D2 2		6.3177	0.285266	0.342134	6.662	0.232	2.90207	1.94923	1.48883	16:03	2590	-813	-23	0	-1826420	-51742	0.000834857	9.94904e-05
398	4	01JH-54a 10M D7		5.26507	0.285266	0.342134	5.609	0.247	2.83123	1.94066	1.4589	16:07	3635	-130	-23	-3	-1826420	-51742	0.00118213	0.000446763	4348
399	4	01JH-54a 10M D7 2, on crack + high OH/O				0.342134	5.794	0.277	2.8575	1.93413	1.47741	16:11	3644	-116	-23	-2	-1826420	-51742	0.00177777
174	2	01JH-54a 10M D90 zrc		5.61412	0.157407	0.961481	6.581	0.236	2.75997	1.90018	1.45248	16:05	3481	-780	-22	-1	-2635140	-51733	0.000951578	0.000262268
400	4	01JH-54a 10M D90 outside CL domain		5.39702	0.285266	0.342134	5.741	0.247	2.86359	1.89932	1.50769	16:15	2881	-11	-18	0	-1826420	-51742	0.00171423	0.000978864
401	4	01JH-54a 2.5NM 10		6.51964	0.285266	0.342134	6.864	0.246	2.82871	1.92529	1.46924	16:21	3841	3233	-20	0	-1826420	-51742	0.000857723	0.000122357	4123
402	4	01JH-54a 2.5NM 10 2		6.66858	0.285266	0.342134	7.013	0.307	2.81906	1.92619	1.46354	16:24	3846	3215	-20	0	-1826420	-51742	0.000861127	0.000125761
403	4	01JH-54a 2.5NM 10 3		6.78355	0.285266	0.342134	7.128	0.171	2.8073	1.91919	1.46275	16:28	3856	3229	-20	-1	-1826420	-51742	0.00100039	0.000265025
404	4	01JH-54a 2.5NM 17		5.23807	0.285266	0.342134	5.582	0.293	2.80559	1.90213	1.47497	16:32	3537	2849	-19	-1	-1826420	-51742	0.00094937	0.000214003	4178
405	4	01JH-54a 2.5NM 17 2		5.06913	0.285266	0.342134	5.413	0.207	2.82977	1.89998	1.48937	16:36	3501	2854	-20	0	-1826420	-51742	0.00110838	0.000373012
406	4	01JH-54a 2.5NM 20		6.78954	0.285266	0.342134	7.134	0.3	2.79952	1.88708	1.48352	16:42	3110	3736	-17	1	-1826420	-51742	0.000890554	0.000155187	4110
407	4	01JH-54a 2.5NM 20 2		6.98048	0.285266	0.342134	7.325	0.201	2.78446	1.88078	1.48049	16:46	3102	3749	-16	1	-1826420	-51742	0.000924857	0.00018949
408	4	01JH-54a 2.5NM 20 3		6.66958	0.285266	0.342134	7.014	0.243	2.77889	1.86498	1.49004	16:50	3089	3724	-17	1	-1826420	-51742	0.000885512	0.000150145
169	2	01JH-54a 2.5NM 34 zrc		5.62911	0.157407	0.961481	6.596	0.214	2.87443	1.96186	1.46515	15:37	3125	2205	3	-4	-2635140	-51733	0.000834145	0.000144834	4167
409	4	01JH-54a 2.5NM 34		6.13377	0.285266	0.342134	6.478	0.346	2.75145	1.85633	1.4822	16:54	2291	3064	-16	1	-1826420	-51742	0.000889677	0.000154311
410	4	01JH-54a 2.5NM 34 2		6.42867	0.285266	0.342134	6.773	0.271	2.71869	1.84796	1.47119	16:58	2313	3057	-15	0	-1826420	-51742	0.000932787	0.00019742
415	4	01JH-54a 2.5M 37		10.1442	0.175892	0.4027	10.551	0.31	2.6933	1.80658	1.49083	17:18	1638	2388	-26	1	-1826420	-51742	0.000899832	0.000148356	3904
416	4	01JH-54a 2.5M 37 2		10.2832	0.175892	0.4027	10.69	0.264	2.66916	1.79719	1.48519	17:24	1635	2372	-26	2	-1826420	-51742	0.000938411	0.000186935
417	4	01JH-54a 2.5M 37 3 Cs-Res=161 outside CL domain		9.90631	0.175892	0.4027	10.313	0.26	2.84526	1.9186	1.48299	17:30	1542	2493	-28	1	-1826420	-51742	0.000839983	8.85065e-05
418	4	01JH-54a 2.5M 40		6.03687	0.175892	0.4027	6.442	0.25	2.92276	1.96382	1.4883	17:35	1202	4186	-21	5	-1826420	-51742	0.00089806	0.000146584	4078
419	4	01JH-54a 2.5M 40 2		6.06886	0.175892	0.4027	6.474	0.27	2.94095	1.97778	1.48699	17:38	1211	4173	-21	5	-1826420	-51742	0.000914191	0.000162715
171	2	01JH-54a 2.5M 58 zrc		6.66211	0.157407	0.961481	7.63	0.214	2.80755	1.93135	1.45367	15:48	658	1760	-5	-5	-2635140	-51733	0.000789096	9.9785e-05	4063
420	4	01JH-54a 2.5M 58		6.29876	0.175892	0.4027	6.704	0.234	2.90787	1.98248	1.46678	17:44	-130	2361	-21	4	-1826420	-51742	0.00083434	8.28639e-05
421	4	01JH-54a 2.5M 58 2, on crack				0.4027	7.643	0.291	3.06268	1.98138	1.54573	17:47	-109	2365	-20	3	-1826420	-51742	0.010202
422	4	01JH-54a 2.5M 58 3		6.87653	0.175892	0.4027	7.282	0.193	2.86273	1.97223	1.45152	17:51	-149	2367	-21	3	-1826420	-51742	0.000884562	0.000133086
173	2	01JH-54a 5M 66 zrc		6.32744	0.157407	0.961481	7.295	0.204	2.79033	1.91864	1.45432	15:59	-525	2491	-1	-3	-2635140	-51733	0.000921438	0.000232127	4195
423	4	01JH-54a 5M 66		6.33875	0.175892	0.4027	6.744	0.234	2.87147	1.95416	1.46941	17:56	-1294	3049	-16	1	-1826420	-51742	0.000830909	7.94332e-05
424	4	01JH-54a 5M 66 2		6.51967	0.175892	0.4027	6.925	0.201	2.85868	1.94731	1.46801	18:00	-1284	3059	-16	0	-1826420	-51742	0.000848638	9.71616e-05
425	4	01JH-54a 5M 68		6.31876	0.175892	0.4027	6.724	0.268	2.8787	1.94579	1.47945	18:04	-1226	3572	-16	4	-1826420	-51742	0.000836648	8.51723e-05	4176
426	4	01JH-54a 5M 68 2		6.47669	0.175892	0.4027	6.882	0.243	2.8496	1.93034	1.47622	18:08	-1243	3586	-16	4	-1826420	-51742	0.000853675	0.000102199
427	4	01JH-54a 5M 78		7.11044	0.175892	0.4027	7.516	0.281	2.82673	1.89279	1.49342	18:13	-2892	2608	-17	4	-1826420	-51742	0.00114481	0.000393338	4135
428	4	01JH-54a 5M 78 2		7.05146	0.175892	0.4027	7.457	0.32	2.78784	1.88367	1.48	18:16	-2862	2638	-17	4	-1826420	-51742	0.000925032	0.000173556
429	4	01JH-54a 5M 81		6.50468	0.175892	0.4027	6.91	0.262	2.74476	1.87374	1.46486	18:20	-2944	3533	-16	8	-1826420	-51742	0.000868388	0.000116912	4103
430	4	01JH-54a 5M 81 2		6.39972	0.175892	0.4027	6.805	0.23	2.73478	1.86298	1.46796	18:24	-2940	3546	-16	8	-1826420	-51742	0.000882726	0.00013125
Mount: 01JH-54b
457	1	2.5NM1_1-2.1		6.7986	0.301841		8.491	0.268	2.13081	2.19812	0.969375	01:03	-118	-893							4001
458	1	2.5NM1_1-2.2		6.8566	0.301841		8.549	0.229	2.15007	2.2167	0.969941	01:07	-191	-870
459	1	2.5NM1_1-2.3 rim?		6.1026	0.301841		7.795	0.28	2.10986	2.21643	0.951919	01:10	-143	-1040
460	1	2.5NM1_1-2.4		6.5766	0.301841		8.269	0.196	2.10382	2.22132	0.947105	01:14	-143	-966
618	5	01JH-54b 2.5NM-1 1-2		6.8719	0.310339	-1.55919	5.302	0.168	2.62773	1.98936	1.32089	05:25	1209	290	-35	15	-2646404	-52516	0.000375291	5.98799e-05		01JH-54b-2.5NM-1 1-2_LR-3	1004.11	6.37242	0.83	6.25402	0.118405	0.3512	6.24072	0.3506	0.3543	0.3463	0.008	2.2818		2.5NM1 1-2-1	1	core	68	34	0.51	0.11	7e-05	0.42520	0.00238	0.2149	0.0037	0.1313	0.0014
																						01JH-54b-2.5NM-1 1-2_LR-4	1004.27	6.41678	0.83	6.29918	0.117598	0.3543
																						01JH-54b-2.5NM-1 1-2_LR-5	1004.53	6.28892	0.83	6.16897	0.119954	0.3463
619	5	01JH-54b 2.5NM-1 1-2		7.15735	0.310339	-1.55919	5.587	0.381	2.61452	1.98537	1.31689	05:28	1202	267	-34	13	-2646404	-52516	0.000386432	7.10217e-05		01JH-54b-2.5NM-1 1-2_LR-4	1004.27	6.41678	0.83	6.29918	0.117598	0.3543	6.21833	0.349367	0.3543	0.3463	0.008	2.28986
																						01JH-54b-2.5NM-1 1-2_LR-5	1004.53	6.28892	0.83	6.16897	0.119954	0.3463
																						01JH-54b-2.5NM-1 1-2_LR-6	1004.65	6.30648	0.83	6.18686	0.119625	0.3475
620	5	01JH-54b 2.5NM-1 1-2		7.21844	0.310339	-1.55919	5.648	0.232	2.63802	1.98307	1.33027	05:32	1167	284	-35	12	-2646404	-52516	0.000392432	7.7021e-05		01JH-54b-2.5NM-1 1-2_LR-1	1003.86	7.79873	0.83	7.70173	0.0970028	0.4434	7.22055	0.4126	0.4434	0.3818	0.0616	14.9297		2.5NM1 1-2-1	1	core	68	34	0.51	0.11	7e-05	0.42520	0.00238	0.2149	0.0037	0.1313	0.0014
																						01JH-54b-2.5NM-1 1-2_LR-2	1004.02	6.84964	0.83	6.73937	0.110265	0.3818
461	1	2.5NM1_4-1.1		6.1626	0.301841		7.855	0.195	2.08202	2.2088	0.942603	01:18	590	-3054							4200
462	1	2.5NM1_4-1.2		6.2796	0.301841		7.972	0.201	2.13155	2.21975	0.960263	01:21	582	-2740
463	1	2.5NM1_4-1.3		5.5266	0.301841		7.219	0.261	2.12115	2.22726	0.952356	01:25	615	-2956
464	1	2.5NM1_4-1.4		5.6466	0.301841		7.339	0.248	2.12817	2.24013	0.95002	01:28	805	-2921
465	1	2.5NM1_4-1.5		6.1956	0.301841		7.888	0.234	2.11158	2.22101	0.95073	01:32	624	-3003
621	5	01JH-54b 2.5NM-1 4-1		6.33206	0.310339	-1.55919	4.763	0.188	2.63666	1.98412	1.32888	05:36	1904	-1758	-32	23	-2646404	-52516	0.000502741	0.000187331		01JH-54b-2.5NM-1 4-1_LR-1	1001.98	10.9155	0.83	10.846	0.069537	0.6613	12.032	0.7528	0.8443	0.6613	0.183	24.3092
																						01JH-54b-2.5NM-1 4-1_LR-2	1001.97	13.2752	0.83	13.2179	0.0572619	0.8443
622	5	01JH-54b 2.5NM-1 4-1		7.00912	0.310339	-1.55919	5.439	0.178	2.63312	1.98295	1.32788	05:40	1936	-1818	-31	25	-2646404	-52516	0.0003549	3.94893e-05		01JH-54b-2.5NM-1 4-1_LR-6	1004.35	6.92021	0.83	6.81105	0.109155	0.3863	5.76346	0.32255	0.3863	0.2588	0.1275	39.5288		2.5NM1 4-1-2	1	rim	58	31	0.54	0	0	0.48634	0.00342	0.2360	0.0042	0.1447	0.0016
																						01JH-54b-2.5NM-1 4-1_LR-7	1005.66	4.87011	0.83	4.71586	0.154251	0.2588
623	5	01JH-54b 2.5NM-1 4-1		6.86189	0.310339	-1.55919	5.292	0.17	2.60707	1.97067	1.32294	05:43	1963	-1771	-31	26	-2646404	-52516	0.000431405	0.000115994		01JH-54b-2.5NM-1 4-1_LR-3	1003.53	8.22159	0.83	8.12952	0.092069	0.4716	8.52717	0.498167	0.5125	0.4716	0.0409	8.2101
																						01JH-54b-2.5NM-1 4-1_LR-4	1003.38	8.82972	0.83	8.74393	0.0857935	0.5125
																						01JH-54b-2.5NM-1 4-1_LR-5	1003.25	8.7942	0.83	8.70806	0.0861364	0.5104
482	1	2.5M_1-2.1		5.90878	0.257918		7.547	0.269	2.13412	2.17923	0.979299	02:34	-3830	-965							3844
483	1	2.5M_1-2.2		5.98978	0.257918		7.628	0.242	2.12046	2.20118	0.963333	02:37	-3896	-1060
484	1	2.5M_1-2.3		6.18078	0.257918		7.819	0.218	2.12289	2.21314	0.959219	02:40	-3749	-875
627	5	01JH-54b 2.5M 1-2		6.96204	0.310339	-1.55919	5.392	0.193	2.59655	1.95193	1.33025	06:02	-2540	249	3	-16	-2646404	-52516	0.000538826	0.000223415		01JH-54b-2.5M 1-2_LR-1_02	1004.98	5.93745	0.83	5.8105	0.126946	0.3241	5.92151	0.331067	0.337	0.3241	0.0129	3.8965		2.5M 1-2-2	2	core	64	28	0.44	0.07	4e-05	0.38299	0.00153	0.2023	0.0021	0.1163	0.0008
																						01JH-54b-2.5M 1-2_LR-2	1004.97	6.14024	0.83	6.01742	0.122816	0.337
																						01JH-54b-2.5M 1-2_LR-3	1004.88	6.06099	0.83	5.93659	0.124398	0.3321
628	5	01JH-54b 2.5M 1-2		7.23647	0.310339	-1.55919	5.666	0.185	2.60438	1.95995	1.3288	06:05	-2503	265	2	-15	-2646404	-52516	0.000390246	7.48351e-05		01JH-54b-2.5M 1-2_LR-4	1004.57	6.14806	0.83	6.0254	0.122662	0.3376	5.91681	0.3309	0.3419	0.3132	0.0287	8.67332
																						01JH-54b-2.5M 1-2_LR-4b	1004.59	6.21779	0.83	6.09648	0.121306	0.3419
																						01JH-54b-2.5M 1-2_LR-5	1004.93	5.75937	0.83	5.62856	0.13081	0.3132
629	5	01JH-54b 2.5M 1-2		7.20642	0.310339	-1.55919	5.636	0.154	2.62692	1.97297	1.33145	06:08	-2472	276	2	-15	-2646404	-52516	0.000404586	8.91748e-05		01JH-54b-2.5M 1-2_LR-6	1005.24	5.11188	0.83	4.9648	0.147085	0.273	5.31046	0.293933	0.3083	0.273	0.0353	12.0095
																						01JH-54b-2.5M 1-2_LR-7	1005.11	5.5528	0.83	5.4172	0.135596	0.3005
																						01JH-54b-2.5M 1-2_LR-8	1004.99	5.68195	0.83	5.54939	0.132563	0.3083
485		2.5M_5-1.1		6.70078	0.257918		8.339	0.286	2.0851	2.1752	0.958577	02:46	-5067	-2960							4043
486		2.5M_5-1.2		6.54878	0.257918		8.187	0.244	2.11872	2.20008	0.963021	02:49	-4988	-2998
630	5	01JH-54b 2.5M 5-1		7.35466	0.310339	-1.55919	5.784	0.196	2.55092	1.97305	1.29288	06:14	-3769	-1760	41	-31	-2646404	-52516	0.000340564	2.51531e-05		01JH-54b-2.5M 5-1_LR-1_02	1006.07	3.99934	0.83	3.81226	0.187079	0.2059	3.99747	0.216633	0.2249	0.2059	0.019	8.77058
																						01JH-54b-2.5M 5-1_LR-2	1005.93	4.22184	0.83	4.04441	0.17743	0.2191
																						01JH-54b-2.5M 5-1_LR-3	1005.87	4.30964	0.83	4.13575	0.173891	0.2249
631	5	01JH-54b 2.5M 5-1		7.65112	0.310339	-1.55919	6.08	0.156	2.56483	1.98651	1.29113	06:17	-3788	-1750	42	-32	-2646404	-52516	0.000345606	3.01955e-05		01JH-54b-2.5M 5-1_LR-4	1005.81	4.46471	0.83	4.29674	0.167974	0.2342	4.34113	0.236533	0.2383	0.2342	0.0041	1.73337		2.5M 5-1-2	2	core	35	20	0.58	0	0	0.43731	0.00176	0.2245	0.0027	0.1523	0.0012
																						01JH-54b-2.5M 5-1_LR-5	1005.83	4.53994	0.83	4.37469	0.165246	0.2383
																						01JH-54b-2.5M 5-1_LR-6	1005.65	4.51799	0.83	4.35196	0.166032	0.2371
632	5	01JH-54b 2.5M 5-1		7.578	0.310339	-1.55919	6.007	0.192	2.57364	1.98944	1.29365	06:20	-3761	-1738	41	-31	-2646404	-52516	0.000368159	5.27486e-05		01JH-54b-2.5M 5-1_LR-2	1005.93	4.22184	0.83	4.04441	0.17743	0.2191	4.15897	0.226067	0.2342	0.2191	0.0151	6.67945		2.5M 5-1-2	2	core	35	20	0.58	0	0	0.43731	0.00176	0.2245	0.0027	0.1523	0.0012
																						01JH-54b-2.5M 5-1_LR-3	1005.87	4.30964	0.83	4.13575	0.173891	0.2249
																						01JH-54b-2.5M 5-1_LR-4	1005.81	4.46471	0.83	4.29674	0.167974	0.2342
491		2.5M_8-1.1		6.59578	0.257918		8.234	0.323	2.11237	2.17861	0.969599	03:09	-3103	-4237							4054
492		2.5M_8-1.2		6.66678	0.257918		8.305	0.282	2.11498	2.19116	0.965234	03:12	-3175	-4324
493		2.5M_8-1.3		6.67578	0.257918		8.314	0.235	2.10551	2.1914	0.960806	03:16	-3053	-4205
637	5	01JH-54b 2.5M 8-1		7.3788	0.429774	-1.60695	5.76	0.164	2.59794	1.96836	1.31985	06:40	-1828	-3049	16	-17	-2646404	-52516	0.000380364	3.77344e-05		01JH-54b-2.5M 8-1_LR-3	1004.72	5.93465	0.83	5.80764	0.127005	0.3241	5.79106	0.3231	0.3241	0.3223	0.0018	0.557103		2.5M 8-1-2	2	core	60	28	0.46	0	0	0.44062	0.00245	0.2267	0.0023	0.1222	0.0008
																						01JH-54b-2.5M 8-1_LR-4	1004.8	5.91344	0.83	5.78599	0.127454	0.3229
																						01JH-54b-2.5M 8-1_LR-5	1004.54	5.90714	0.83	5.77955	0.127588	0.3223
638	5	01JH-54b 2.5M 8-1		7.3768	0.429774	-1.60695	5.758	0.227	2.67749	2.00591	1.3348	06:44	-1787	-3036	15	-17	-2646404	-52516	0.000376226	3.35967e-05		01JH-54b-2.5M 8-1_LR-6	1005.36	5.19065	0.83	5.04576	0.144892	0.2783	5.06978	0.2795	0.2807	0.2783	0.0024	0.858676		2.5M 8-1-2	2	core	60	28	0.46	0	0	0.44062	0.00245	0.2267	0.0023	0.1222	0.0008
																						01JH-54b-2.5M 8-1_LR-7	1005.28	5.23742	0.83	5.0938	0.14362	0.2807
639	5	01JH-54b 2.5M 8-1		7.41085	0.429774	-1.60695	5.792	0.224	2.62663	2.0065	1.30906	06:47	-1852	-3057	17	-16	-2646404	-52516	0.000391613	4.89838e-05		01JH-54b-2.5M 8-1_LR-1	1004.77	5.96619	0.83	5.83985	0.126344	0.326	5.86166	0.3272	0.3284	0.326	0.0024	0.733496
																						01JH-54b-2.5M 8-1_LR-2	1004.63	6.00893	0.83	5.88347	0.125459	0.3284
487	1	(2.5M_9-2.1)		6.62178	0.257918		8.26	0.153	2.09076	2.18021	0.958973	02:55	-5136	-4726							4074
488	1	(2.5M_9-2.2)		6.92978	0.257918		8.568	0.264	2.11569	2.19797	0.962567	02:58	-5156	-4784
489	1	(2.5M_9-2.3)		6.69178	0.257918		8.33	0.29	2.11743	2.20329	0.961033	03:01	-5126	-4869
490	1	(2.5M_9-2.4)		6.63378	0.257918		8.272	0.244	2.11055	2.18713	0.964985	03:05	-5186	-4616
640	5	01JH-54b 2.5M 9-2		7.3147	0.429774	-1.60695	5.696	0.252	2.46069	1.95525	1.2585	06:51	-3893	-3537	60	-33	-2646404	-52516	0.000434582	9.19522e-05		01JH-54b-2.5M 9-2_LR-5	1004.38	7.47779	0.83	7.37667	0.101115	0.4226	6.73609	0.38225	0.4226	0.3419	0.0807	21.1118		2.5M 9-2-1	1	core	75	38	0.51	0.08	5e-05	0.44660	0.00286	0.2116	0.0036	0.1308	0.0014
																						01JH-54b-2.5M 9-2_LR-6	1005.12	6.21683	0.83	6.09551	0.121325	0.3419
641	5	01JH-54b 2.5M 9-2		7.35877	0.429774	-1.60695	5.74	0.225	2.45149	1.93249	1.26856	06:54	-3870	-3517	59	-33	-2646404	-52516	0.000443619	0.00010099		01JH-54b-2.5M 9-2_LR-3	1004.45	7.62909	0.83	7.52996	0.099134	0.4323	7.55891	0.43425	0.4362	0.4323	0.0039	0.8981
																						01JH-54b-2.5M 9-2_LR-4	1004.44	7.68627	0.83	7.58786	0.0984052	0.4362
642	5	01JH-54b 2.5M 9-2		7.33073	0.429774	-1.60695	5.712	0.243	2.4553	1.92619	1.27469	06:58	-3843	-3542	59	-33	-2646404	-52516	0.000441028	9.83983e-05		01JH-54b-2.5M 9-2_LR-1	1004.17	7.92826	0.83	7.83282	0.0954362	0.4519	7.76453	0.44765	0.4519	0.4434	0.0085	1.8988		2.5M 9-2-1	1	core	75	38	0.51	0.08	5e-05	0.44660	0.00286	0.2116	0.0036	0.1308	0.0014
																						01JH-54b-2.5M 9-2_LR-2	1004.27	7.7933	0.83	7.69623	0.0970696	0.4434
503	1	5M_4-1.1 core		5.87956	0.333684		7.572	0.268	2.23801	2.29388	0.975644	03:54	-5466	3105							4130
504	1	5M_4-1.2 core		7.16156	0.333684		8.854	0.236	2.23375	2.31586	0.964546	03:57	-5483	3062
505	1	5M_4-1.3 rim		7.80056	0.333684		9.493	0.208	2.24089	2.31516	0.967923	04:01	-5574	3115
506	1	5M_4-1.4 core		6.59156	0.333684		8.284	0.16	2.2403	2.31727	0.966783	04:04	-5478	3087
507	1	5M_4-1.5 rim		7.48656	0.333684		9.179	0.214	2.25138	2.32279	0.96926	04:08	-5571	3145
508	1	5M_4-1.6 core		7.54856	0.333684		9.241	0.197	2.24738	2.33135	0.963983	04:11	-5431	3082
509	1	5M_4-1.7 core		6.72756	0.333684		8.42	0.248	2.24522	2.33041	0.963443	04:14	-5512	3118
510	1	5M_4-1.8 core		6.53756	0.333684		8.23	0.268	2.26194	2.33163	0.970113	04:18	-5527	3091
511	1	5M_4-1.9 rim		7.62856	0.333684		9.321	0.189	2.25483	2.32791	0.968608	04:21	-5570	3097
643	5	01JH-54b 5M 4-1		6.95813	0.429774	-1.60695	5.34	0.226	2.53771	1.92353	1.3193	07:02	-4190	4245	8	-6	-2646404	-52516	0.000416949	7.43198e-05		01JH-54b-5M 4-1_LR-1	1003.16	8.09806	0.83	8.0046	0.0934576	0.463	7.49597	0.4301	0.463	0.4098	0.0532	12.3692		5M 4-1-3	1	core	132	140	1.06	0.35	0.00022	0.43922	0 00238	0.0446	0.0011	0.1017	0.0011
																						01JH-54b-5M 4-1_LR-2	1003.79	7.28535	0.83	7.1816	0.103753	0.4098
																						01JH-54b-5M 4-1_LR-3	1003.77	7.40381	0.83	7.3017	0.102113	0.4175
644	5	01JH-54b 5M 4-1		8.01182	0.429774	-1.60695	6.392	0.26	2.5241	1.91387	1.31885	07:05	-4242	4245	8	-6	-2646404	-52516	0.000446131	0.000103502		01JH-54b-5M 4-1_LR-4	1001.66	11.252	0.83	11.1845	0.0674744	0.6857	10.7452	0.6538	0.6857	0.6027	0.083	12.695
																						01JH-54b-5M 4-1_LR-5	1001.86	10.1178	0.83	10.0428	0.0749699	0.6027
																						01JH-54b-5M 4-1_LR-6	1000.95	11.0768	0.83	11.0083	0.0685328	0.673
494		5M_4-2.1 rim		6.03078	0.257918		7.669	0.328	2.1116	2.16601	0.97488	03:23	-5730	3109							4166
495		5M_4-2.2 core		5.67078	0.257918		7.309	0.2	2.11612	2.18889	0.966753	03:26	-5759	3134
496		5M_4-2.3 rim		6.24778	0.257918		7.886	0.308	2.09967	2.19973	0.954514	03:30	-5835	3114
497		5M_4-2.4 core		5.08078	0.257918		6.719	0.205	2.08106	2.18807	0.951091	03:33	-5799	3145
498		5M_4-2.5 rim		5.95078	0.257918		7.589	0.256	2.18044	2.23102	0.977331	03:37	-5691	3146
645	5	01JH-54b 5M 4-2		6.7538	0.429774	-1.60695	5.136	0.198	2.50733	1.9001	1.31958	07:09	-4496	4284	13	-8	-2646404	-52516	0.000514758	0.000172129		01JH-54b-5M 4-2_LR-1	1002.62	9.42676	0.83	9.34635	0.0804124	0.5542	10.1104	0.6088	0.6872	0.5542	0.133	21.8463		5M 4-2-1	1	core	204	92	0.45	0.18	0.00011	0.42149	0.00221	0.0797	0.0025	0.0507	0.0006
																						01JH-54b-5M 4-2_LR-2	1001.92	11.2669	0.83	11.1995	0.0673859	0.6872
																						01JH-54b-5M 4-2_LR-3	1002.9	9.86223	0.83	9.78534	0.0768947	0.585
646	5	01JH-54b 5M 4-2		6.91606	0.429774	-1.60695	5.298	0.18	2.48635	1.89376	1.31291	07:12	-4518	4317	13	-7	-2646404	-52516	0.000426896	8.4267e-05		01JH-54b-5M 4-2_LR-4	1005.86	4.02906	0.83	3.84333	0.18573	0.2077	6.43531	0.36995	0.5322	0.2077	0.3245	87.7146		5M 4-2-2	1	core	124	69	0.56	0.17	0.00011	0.47507	0.00265	0.1763	0.0029	0.1173	0.0010
																						01JH-54b-5M 4-2_LR-5	1003.43	9.11046	0.83	9.02728	0.0831762	0.5322
392	8	01JH-54b 2.5NM-2 1-1		6.65853	0.352671	-2.01114	4.634	0.195	2.93291	1.77477	1.65255	0.185417	3875	1647	-19	28	-1858188	-190192	0.000580243	0.000172123		01JH-54b-2.5NM-2 1-1_LR-1	1003.97	9.56488	0.83	9.48562	0.0792623	0.564	7.81397	0.452967	0.564	0.3593	0.2047	45.191
																						01JH-54b-2.5NM-2 1-1_LR-2	1004.4	6.49436	0.83	6.37815	0.116213	0.3593
																						01JH-54b-2.5NM-2 1-1_LR-3	1004.05	7.67668	0.83	7.57815	0.0985267	0.4356
393	8	01JH-54b 2.5NM-2 1-1 a little brighter oscillatory Cs-res 125		6.65653	0.352671	-2.01114	4.632	0.192	2.80512	1.70002	1.65005	0.190278	3919	1487	-18	28	-1858188	-190192	0.000525213	0.000117093		01JH-54b-2.5NM-2 1-1_LR-4	1005.12	6.03694	0.83	5.91205	0.124886	0.3303	6.02156	0.337267	0.3463	0.3303	0.016	4.74402
																						01JH-54b-2.5NM-2 1-1_LR-5	1005.08	6.2858	0.83	6.16579	0.120013	0.3463
																						01JH-54b-2.5NM-2 1-1_LR-6	1005.18	6.11026	0.83	5.98685	0.123409	0.3352
394	8	01JH-54b 2.5NM-2 14-3 straight in CL dark core		7.41806	0.352671	-2.01114	5.392	0.255	2.66663	1.58295	1.6846	0.193056	-357	1933	20	-14	-1858188	-190192	0.000614088	0.000205968	3591	01JH-54b-2.5NM-2 14-3_LR-4	1002.83	10.2547	0.83	10.1807	0.073978	0.6127	10.0743	0.605067	0.6127	0.5977	0.015	2.47907
																						01JH-54b-2.5NM-2 14-3_LR-5	1002.92	10.0465	0.83	9.971	0.0754971	0.5977
																						01JH-54b-2.5NM-2 14-3_LR-6	1002.92	10.146	0.83	10.0712	0.0747634	0.6048
395	8	01JH-54b 2.5NM-2 14-3 oscillatory mantle		7.4892	0.352671	-2.01114	5.463	0.241	2.55981	1.51403	1.69073	0.195833	-347	1988	20	-13	-1858188	-190192	0.000564437	0.000156318		01JH-54b-2.5NM-2 14-3_LR-1	1004.38	6.71305	0.83	6.60057	0.112478	0.373	6.97611	0.3969	0.4188	0.373	0.0458	11.5394
																						01JH-54b-2.5NM-2 14-3_LR-2	1004.02	7.11699	0.83	7.01081	0.106176	0.3989
																						01JH-54b-2.5NM-2 14-3_LR-3	1003.69	7.41885	0.83	7.31694	0.101909	0.4188
396	8	01JH-54b 2.5NM-2 14-3 darker rim		7.53128	0.352671	-2.01114	5.505	0.184	2.48809	1.47241	1.68981	0.198611	-318	1800	21	-15	-1858188	-190192	0.000646035	0.000237915		01JH-54b-2.5NM-2 14-3_LR-7	1004.58	7.56564	0.83	7.46568	0.0999554	0.4284	8.56066	0.5022	0.6105	0.4284	0.1821	36.2605
																						01JH-54b-2.5NM-2 14-3_LR-8	1004.16	8.16014	0.83	8.06739	0.0927546	0.4677
																						01JH-54b-2.5NM-2 14-3_LR-9	1002.87	10.2231	0.83	10.1489	0.0742046	0.6105
466	1	(2.5NM2_7-1.1 rim)		5.9736	0.301841		7.666	0.193	2.15034	2.20419	0.97557	01:38	1973	3777							4164
467	1	(2.5NM2_7-1.2 core)		6.7356	0.301841		8.428	0.225	2.16147	2.21647	0.975188	01:42	2038	3678
468	1	(2.5NM2_7-1.3 core)		6.7126	0.301841		8.405	0.233	2.16986	2.21659	0.978919	01:45	1988	3705
469	1	(2.5NM2_7-1.4 rim)		6.1536	0.301841		7.846	0.251	2.17599	2.21588	0.981998	01:49	1980	3743
470	1	(2.5NM2_7-1.5 core)		6.7856	0.301841		8.478	0.219	2.17844	2.22699	0.978199	01:52	1984	3724
471	1	(2.5NM2_7-1.6 core)		6.6946	0.301841		8.387	0.276	2.15025	2.23564	0.961808	01:55	2030	3709
472	1	(2.5NM2_7-1.7 core)		6.5726	0.301841		8.265	0.288	2.17707	2.23481	0.974163	01:59	2057	3642
473	1	(2.5NM2_7-1.8 rim)		6.0346	0.301841		7.727	0.309	2.08947	2.22539	0.938922	02:02	1993	3776
474	1	(2.5NM2_7-1.9 rim?)		6.0896	0.301841		7.782	0.247	2.16826	2.22625	0.973953	02:05	1971	3648
475	1	(2.5NM2_7-1.10 core)		6.7346	0.301841		8.427	0.195	2.14898	2.23587	0.961136	02:08	2000	3673
476	1	(2.5NM2_7-1.11 rim)		6.2826	0.301841		7.975	0.313	2.14458	2.2117	0.969653	02:12	2037	3744
624	5	01JH-54b 2.5NM-2 7-1		6.1638	0.310339	-1.55919	4.595	0.221	2.39277	1.97297	1.21277	05:50	3331	4912	-72	40	-2646404	-52516	0.000376949	6.1538e-05		01JH-54b-2.5NM-2 7-1_LR-6	1004.82	6.22285	0.83	6.10164	0.121209	0.3419	7.52043	0.433275	0.5536	0.3419	0.2117	48.8604		2.5NM2 7-1-1	1	core	70	29	0.42	0.15	9e-05	0.47254	0.00472	0.2246	0.0037	0.1109	0.0012
																						01JH-54b-2.5NM-2 7-1_LR-7	1004.36	6.89277	0.83	6.78319	0.109584	0.3844
																						01JH-54b-2.5NM-2 7-1_LR-7b	1004.06	7.94835	0.83	7.85315	0.0951978	0.4532
																						01JH-54b-2.5NM-2 7-1_LR-8	1003.39	9.42416	0.83	9.34373	0.0804344	0.5536
625	5	01JH-54b 2.5NM-2 7-1		6.25895	0.310339	-1.55919	4.69	0.199	2.43358	1.9675	1.23689	05:53	3263	4918	-71	40	-2646404	-52516	0.000335261	1.985e-05		01JH-54b-2.5NM-2 7-1_LR-3	1005.37	5.38127	0.83	5.24142	0.139846	0.2897	5.21365	0.2881	0.2897	0.2855	0.0042	1.45783		2.5NM2 7-1-2	1	core	63	23	0.37	0.11	1e-05	0.47462	0.00775	0.2270	0.0045	0.0970	0.0012
																						01JH-54b-2.5NM-2 7-1_LR-4	1005.88	5.37408	0.83	5.23405	0.14003	0.2891
																						01JH-54b-2.5NM-2 7-1_LR-5	1005.66	5.30723	0.83	5.16547	0.141763	0.2855
626	5	01JH-54b 2.5NM-2 7-1		6.41319	0.310339	-1.55919	4.844	0.204	2.4481	1.9702	1.24257	05:56	3256	4935	-71	41	-2646404	-52516	0.000385454	7.00428e-05		01JH-54b-2.5NM-2 7-1_LR-1	1003.64	9.39418	0.83	9.31349	0.0806886	0.5515	7.96594	0.464933	0.5536	0.2897	0.2639	56.7608
																						01JH-54b-2.5NM-2 7-1_LR-2	1004.04	9.42334	0.83	9.3429	0.0804413	0.5536
																						01JH-54b-2.5NM-2 7-1_LR-3	1005.37	5.38127	0.83	5.24142	0.139846	0.2897
397	8	01JH-54b 2.5NM-1 7-1 oscillatory core	mineralized fracture			-2.01114	5.461	0.239	2.37635	1.41245	1.68244	0.202083	405	-2908	58	-11	-1858188	-190192	0.00201501			01JH-54b-2.5NM-1 7-1_LR-1	1002.43	10.6143	0.83	10.5428	0.0714933	0.6386	10.4099	0.6293	0.6495	0.5998	0.0497	7.89766
																						01JH-54b-2.5NM-1 7-1_LR-2	1002.57	10.7606	0.83	10.6901	0.0705295	0.6495
																						01JH-54b-2.5NM-1 7-1_LR-3	1002.8	10.072	0.83	9.99669	0.0753077	0.5998
398	8	01JH-54b 2.5NM-1 7-1 bright spot Cs-res 126		7.26575	0.352671	-2.01114	5.24	0.312	2.50023	1.46126	1.71101	0.20625	516	-2861	53	-8	-1858188	-190192	0.00056339	0.000155271		01JH-54b-2.5NM-1 7-1_LR-4	1005.39	4.90938	0.83	4.75634	0.15304	0.2611	5.12466	0.2828	0.3108	0.2611	0.0497	17.5743
																						01JH-54b-2.5NM-1 7-1_LR-5	1005.03	5.16964	0.83	5.02417	0.14547	0.2765
																						01JH-54b-2.5NM-1 7-1_LR-6	1004.62	5.72506	0.83	5.59348	0.131581	0.3108
399	8	01JH-54b 2.5NM-1 9-2 CL dark core		6.76875	0.352671	-2.01114	4.744	0.218	2.57732	1.50214	1.71577	0.210417	3660	-3758	3	11	-1858188	-190192	0.000650428	0.000242308	4074	01JH-54b-2.5NM-1 9-2_LR-4	1001.61	10.2775	0.83	10.2037	0.0738153	0.6141	13.2952	0.86805	1.122	0.6141	0.5079	58.5105
																						01JH-54b-2.5NM-1 9-2_LR-5	999.829	16.433	0.83	16.3867	0.0463198	1.122
400	8	01JH-54b 2.5NM-1 9-2 oscillatory mantle		6.67055	0.352671	-2.01114	4.646	0.248	2.52807	1.49662	1.68919	0.213194	3730	-3689	28	10	-1858188	-190192	0.000521867	0.000113747		01JH-54b-2.5NM-1 9-2_LR-1	1005.34	5.21359	0.83	5.06932	0.144265	0.2795	5.0063	0.275767	0.2819	0.2659	0.016	5.80201
																						01JH-54b-2.5NM-1 9-2_LR-2	1005.28	5.25442	0.83	5.11126	0.143164	0.2819
																						01JH-54b-2.5NM-1 9-2_LR-3	1005.3	4.98895	0.83	4.83831	0.150643	0.2659
401	8	01JH-54b 2.5NM-1 9-2 darker rim		6.78779	0.352671	-2.01114	4.763	0.241	2.51667	1.49103	1.68788	0.215278	3866	-3843	26	10	-1858188	-190192	0.000564188	0.000156068		01JH-54b-2.5NM-1 9-2_LR-6	1004.12	7.06979	0.83	6.96291	0.106876	0.3958	7.01593	0.3993	0.4028	0.3958	0.007	1.75307
																						01JH-54b-2.5NM-1 9-2_LR-7	1004.07	7.17428	0.83	7.06894	0.105339	0.4028
422	8	01JH-54b 5M 3-1 dark core		6.71585	0.260353	-1.98154	4.721	0.225	2.58832	1.53707	1.68394	0.296528	-1615	4548	11	12	-1858188	-190192	0.00128638	0.00080084		01JH-54b-5M 3-1_LR-1	1001.75	11.7969	0.83	11.7325	0.0643819	0.7271	11.8184	0.7336	0.7401	0.7271	0.013	1.77208
																						01JH-54b-5M 3-1_LR-2	1000.09	11.9677	0.83	11.9042	0.0634701	0.7401
424	8	01JH-54b 5M 3-1 oscillatory mantle		6.76094	0.260353	-1.98154	4.766	0.279	2.49006	1.48845	1.67293	0.301389	-1550	4501	11	11	-1858188	-190192	0.000599037	0.0001135		01JH-54b-5M 3-1_LR-3	998.493	15.4837	0.83	15.4346	0.0491428	1.0333	12.2701	0.777433	1.0333	0.6148	0.4185	53.831
																						01JH-54b-5M 3-1_LR-4	1001.46	11.2287	0.83	11.1611	0.0676133	0.6842
																						01JH-54b-5M 3-1_LR-5	1001.71	10.2883	0.83	10.2146	0.0737385	0.6148
425	8	01JH-54b 5M 3-1 wavy intruding rim		6.77997	0.260353	-1.98154	4.785	0.27	2.44508	1.47131	1.66183	0.304167	-1503	4480	11	12	-1858188	-190192	0.000503219	1.76823e-05		01JH-54b-5M 3-1_LR-6	1004.89	5.29263	0.83	5.15048	0.142148	0.2843	5.92984	0.331967	0.3881	0.2843	0.1038	31.2682
																						01JH-54b-5M 3-1_LR-7	1004.12	6.94446	0.83	6.83568	0.108779	0.3881
																						01JH-54b-5M 3-1_LR-8	1005.12	5.93044	0.83	5.80335	0.127094	0.3235
426	8	01JH-54b 5M 3-2 oscillatory core (fracture)				-1.98154	4.724	0.269	2.40834	1.42727	1.68738	0.30625	-2864	4424	36	-2	-1858188	-190192	0.00501061			01JH-54b-5M 3-2_LR-1	1002.43	9.84966	0.83	9.77267	0.0769919	0.5836	8.99336	0.53025	0.5836	0.4769	0.1067	20.1226
																						01JH-54b-5M 3-2_LR-2	1003.15	8.30521	0.83	8.21406	0.0911522	0.4769
427	8	01JH-54b 5M 3-2 oscillatory darker rim		7.07556	0.260353	-1.98154	5.08	0.232	2.36833	1.39966	1.69208	0.309028	-2914	4421	37	-2	-1858188	-190192	0.00116622	0.000680685		01JH-54b-5M 3-2_LR-3	998.208	16.2998	0.83	16.2531	0.0466962	1.1088	17.619	1.24415	1.3345	1.1088	0.2257	18.1409
																						01JH-54b-5M 3-2_LR-4	997.837	18.5513	0.83	18.5102	0.0410569	1.3345
																						01JH-54b-5M 3-2_LR-4b	997.939	17.969	0.83	17.9266	0.0423805	1.2738
																						01JH-54b-5M 3-2_LR-5	998.174	17.8286	0.83	17.7859	0.0427126	1.2595
429	8	01JH-54b 5M 6-2 CL dark core		7.05452	0.260353	-1.98154	5.059	0.305	2.2949	1.35084	1.69887	0.313889	-2424	3633	35	-11	-1858188	-190192	0.000651985	0.000166448		01JH-54b-5M 6-2_LR-4	1001.55	8.79849	0.83	8.7124	0.0860948	0.5104	9.48145	0.56405	0.6177	0.5104	0.1073	19.0231
																						01JH-54b-5M 6-2_LR-5	1001.29	10.324	0.83	10.2505	0.0734858	0.6177
430	8	01JH-54b 5M 6-2 CL oscillatory rim		6.94731	0.260353	-1.98154	4.952	0.272	2.25587	1.33394	1.69113	0.315972	-2441	3686	35	-10	-1858188	-190192	0.00059628	0.000110743		01JH-54b-5M 6-2_LR-1	1003.31	7.86863	0.83	7.77248	0.0961511	0.4479	8.76415	0.5149	0.5857	0.4479	0.1378	26.7625
																						01JH-54b-5M 6-2_LR-2	1002.01	9.87833	0.83	9.80156	0.0767705	0.5857
																						01JH-54b-5M 6-2_LR-3	1002.43	8.80446	0.83	8.71842	0.0860371	0.5111
433	8	01JH-54b 5M 6-2 another oscillatory spot, Cs-res = 128		7.17776	0.260353	-1.98154	5.182	0.199	2.35122	1.3754	1.70948	0.326389	-2383	3625	35	-11	-1858188	-190192	0.000873705	0.000388168		01JH-54b-5M 6-2_LR-6	1001.02	10.7429	0.83	10.6723	0.0706447	0.6481	9.79869	0.586	0.6481	0.5473	0.1008	17.2014
																						01JH-54b-5M 6-2_LR-7	1002.24	9.33237	0.83	9.25115	0.0812178	0.5473
																						01JH-54b-5M 6-2_LR-8	1001.78	9.55203	0.83	9.47266	0.0793679	0.5626
Mount: 01JH-60a
[truncated: 527 more rows]
[truncated: 24 more columns]
